# Supplementary material for: rMATS-turbo: an efficient and flexible computational tool for alternative splicing analysis of large-scale RNA-seq data
Source: Springer Nature journal article supplement (doi:10.1038/s41596-023-00944-2), 2024-02-23
Supplement: MOESM3 [file 41596_2023_944_MOESM3_ESM9.xlsx]

## Sheet: Supplementary Table 1
Supplementary Table 1. Full list of SRA accession numbers and sample information for Example 1 (PC3E and GS689 cell lines; BioProject PRJNA438990)
Run	Assay Type	AvgSpotLen	Bases	BioProject	BioSample	Bytes	Cell_Line	Center Name	Consent	DATASTORE filetype	DATASTORE provider	DATASTORE region	Experiment	Genotype	GEO_Accession (exp)	Instrument	LibraryLayout	LibrarySelection	LibrarySource	media	Organism	Platform	ReleaseDate	Sample Name	source_name	SRA Study	Tissue
SRR6862379	RNA-Seq	202	25615006728	PRJNA438990	SAMN08737633	11223661601	PC3E	GEO	public	sra fastq	gs ncbi s3	s3.us-east-1 ncbi.public gs.US	SRX3817280	wild type	GSM3053696	Illumina HiSeq 4000	PAIRED	cDNA	TRANSCRIPTOMIC	DMEM/F12 with 10% FBS 1%NEAA and 400 µg/ml G418	Homo sapiens	ILLUMINA	2019-01-23T00:00:00Z	GSM3053696	PC3E prostate cancer cell line	SRP136023	prostate cancer
SRR6862380	RNA-Seq	202	25680116176	PRJNA438990	SAMN08737632	11177648985	PC3E	GEO	public	fastq sra	ncbi gs s3	gs.US ncbi.public s3.us-east-1	SRX3817282	wild type	GSM3053697	Illumina HiSeq 4000	PAIRED	cDNA	TRANSCRIPTOMIC	DMEM/F12 with 10% FBS 1%NEAA and 400 µg/ml G418	Homo sapiens	ILLUMINA	2019-01-23T00:00:00Z	GSM3053697	PC3E prostate cancer cell line	SRP136023	prostate cancer
SRR6862381	RNA-Seq	202	27043065928	PRJNA438990	SAMN08737634	11796331451	PC3E	GEO	public	sra fastq	s3 ncbi gs	s3.us-east-1 ncbi.public gs.US	SRX3817283	wild type	GSM3053698	Illumina HiSeq 4000	PAIRED	cDNA	TRANSCRIPTOMIC	DMEM/F12 with 10% FBS 1%NEAA and 400 µg/ml G418	Homo sapiens	ILLUMINA	2019-01-23T00:00:00Z	GSM3053698	PC3E prostate cancer cell line	SRP136023	prostate cancer
SRR6862382	RNA-Seq	202	23831426518	PRJNA438990	SAMN08737631	10427066701	GS689	GEO	public	fastq sra	ncbi s3 gs	s3.us-east-1 gs.US ncbi.public	SRX3817284	wild type	GSM3053699	Illumina HiSeq 4000	PAIRED	cDNA	TRANSCRIPTOMIC	DMEM/F12 with 10% FBS 1%NEAA and 400 µg/ml G418	Homo sapiens	ILLUMINA	2019-01-23T00:00:00Z	GSM3053699	GS689.Li prostate cancer cell line	SRP136023	prostate cancer
SRR6862383	RNA-Seq	202	25533250864	PRJNA438990	SAMN08737630	11132809538	GS689	GEO	public	sra fastq	s3 gs ncbi	ncbi.public gs.US s3.us-east-1	SRX3817285	wild type	GSM3053700	Illumina HiSeq 4000	PAIRED	cDNA	TRANSCRIPTOMIC	DMEM/F12 with 10% FBS 1%NEAA and 400 µg/ml G418	Homo sapiens	ILLUMINA	2019-01-23T00:00:00Z	GSM3053700	GS689.Li prostate cancer cell line	SRP136023	prostate cancer
SRR6862384	RNA-Seq	202	23356818630	PRJNA438990	SAMN08737629	10235846650	GS689	GEO	public	sra fastq	s3 ncbi gs	gs.US s3.us-east-1 ncbi.public	SRX3817286	wild type	GSM3053701	Illumina HiSeq 4000	PAIRED	cDNA	TRANSCRIPTOMIC	DMEM/F12 with 10% FBS 1%NEAA and 400 µg/ml G418	Homo sapiens	ILLUMINA	2019-01-23T00:00:00Z	GSM3053701	GS689.Li prostate cancer cell line	SRP136023	prostate cancer

## Sheet: Supplementary Table 2
Supplementary Table 2. Full list of SRA accession numbers and sample information for Example 2 (1,019 cancer cell lines from CCLE; BioProject PRJNA523380)
Run	AGE	Assay Type	AssemblyName	AvgSpotLen	Bases	Biomaterial_provider	BioProject	BioSample	BioSampleModel	Bytes	Cell_Line	Center Name	Consent	DATASTORE filetype	DATASTORE provider	DATASTORE region	disease	disease_stage	Ethnicity	Experiment	Instrument	Isolate	Library Name	LibraryLayout	LibrarySelection	LibrarySource	Organism	Platform	ReleaseDate	Sample Name	SAMPLE_TYPE	sex	SRA Study	Tissue
SRR8615223	NA	RNA-Seq	GCA_000001405.13	202	17348945134	NA	PRJNA523380	SAMN10989616	Human	9345709222	OCIMY5	BROAD INSTITUTE	public	bam,sra	s3,ncbi,gs	gs.US,s3.us-east-1,ncbi.public	NA	NA	NA	SRX5414530	Illumina HiSeq 2500	cell line	RNASeq-OCIMY5_HAEMATOPOIETIC_AND_LYMPHOID_TISSUE	PAIRED	cDNA	TRANSCRIPTOMIC	Homo sapiens	ILLUMINA	2019-03-27T00:00:00Z	OCIMY5_HAEMATOPOIETIC_AND_LYMPHOID_TISSUE	cell culture	NA	SRP186687	haematopoietic_and_lymphoid_tissue
SRR8615226	72	RNA-Seq	GCA_000001405.13	202	18687851634	HPACC	PRJNA523380	SAMN10988362	Human	9880139166	OE19	BROAD INSTITUTE	public	bam,sra	ncbi,gs,s3	ncbi.public,s3.us-east-1,gs.US	carcinoma (adenocarcinoma)	primary	Caucasian	SRX5414527	Illumina HiSeq 2500	cell line	RNASeq-OE19_OESOPHAGUS	PAIRED	cDNA	TRANSCRIPTOMIC	Homo sapiens	ILLUMINA	2019-03-27T00:00:00Z	OE19_OESOPHAGUS	cell culture	male	SRP186687	oesophagus
SRR8615227	74	RNA-Seq	GCA_000001405.13	202	19905236752	HPACC	PRJNA523380	SAMN10989579	Human	10506160474	OE21	BROAD INSTITUTE	public	bam,sra	ncbi,gs,s3	s3.us-east-1,gs.US,ncbi.public	carcinoma (squamous_cell_carcinoma)	primary	Caucasian	SRX5414526	Illumina HiSeq 2500	cell line	RNASeq-OE21_OESOPHAGUS	PAIRED	cDNA	TRANSCRIPTOMIC	Homo sapiens	ILLUMINA	2019-03-27T00:00:00Z	OE21_OESOPHAGUS	cell culture	male	SRP186687	oesophagus
SRR8615228	73	RNA-Seq	GCA_000001405.13	202	19152015920	HPACC	PRJNA523380	SAMN10987775	Human	9623553754	OE33	BROAD INSTITUTE	public	bam,sra	ncbi,s3,gs	gs.US,s3.us-east-1,ncbi.public	other (metaplasia)	primary	Caucasian	SRX5414525	Illumina HiSeq 2500	cell line	RNASeq-OE33_OESOPHAGUS	PAIRED	cDNA	TRANSCRIPTOMIC	Homo sapiens	ILLUMINA	2019-03-27T00:00:00Z	OE33_OESOPHAGUS	cell culture	female	SRP186687	oesophagus
SRR8615229	NA	RNA-Seq	GCA_000001405.13	202	17238188938	NA	PRJNA523380	SAMN10988391	Human	9208697171	OELE	BROAD INSTITUTE	public	sra,bam	ncbi,gs,s3	ncbi.public,gs.US,s3.us-east-1	other (immortalized_epithelial)	NA	Caucasian	SRX5414524	Illumina HiSeq 2500	cell line	RNASeq-OELE_OVARY	PAIRED	cDNA	TRANSCRIPTOMIC	Homo sapiens	ILLUMINA	2019-03-27T00:00:00Z	OELE_OVARY	cell culture	NA	SRP186687	ovary
SRR8615230	60	RNA-Seq	GCA_000001405.13	202	23191527484	DSMZ:ONCO-DG-1	PRJNA523380	SAMN10988512	Human	12185589821	ONCO-DG-1	BROAD INSTITUTE	public	bam,sra	gs,ncbi,s3	s3.us-east-1,gs.US,ncbi.public	carcinoma (adenocarcinoma)	metastasis	Caucasian	SRX5414523	Illumina HiSeq 2500	cell line	RNASeq-ONCODG1_OVARY	PAIRED	cDNA	TRANSCRIPTOMIC	Homo sapiens	ILLUMINA	2019-03-27T00:00:00Z	ONCODG1_OVARY	cell culture	female	SRP186687	ovary
SRR8615231	56	RNA-Seq	GCA_000001405.13	202	12270092868	ATCC:MES-SA	PRJNA523380	SAMN10987906	Human	5874936339	MES-SA	BROAD INSTITUTE	public	sra,bam	gs,ncbi,s3	gs.US,ncbi.public,s3.us-east-1	sarcoma	primary	Caucasian	SRX5414522	Illumina HiSeq 2500	cell line	RNASeq-MESSA_SOFT_TISSUE	PAIRED	cDNA	TRANSCRIPTOMIC	Homo sapiens	ILLUMINA	2019-03-27T00:00:00Z	MESSA_SOFT_TISSUE	cell culture	female	SRP186687	soft_tissue
SRR8615232	58	RNA-Seq	GCA_000001405.13	202	14880243948	DSMZ:MEL-JUSO	PRJNA523380	SAMN10988249	Human	7050390110	MEL-JUSO	BROAD INSTITUTE	public	sra,bam	s3,gs,ncbi	ncbi.public,s3.us-east-1,gs.US	malignant_melanoma	primary	Caucasian	SRX5414521	Illumina HiSeq 2500	cell line	RNASeq-MELJUSO_SKIN	PAIRED	cDNA	TRANSCRIPTOMIC	Homo sapiens	ILLUMINA	2019-03-27T00:00:00Z	MELJUSO_SKIN	cell culture	female	SRP186687	skin
SRR8615234	55	RNA-Seq	GCA_000001405.13	202	15870447544	NIBRI	PRJNA523380	SAMN10988184	Human	7922717507	MEG-01	BROAD INSTITUTE	public	sra,bam	ncbi,s3,gs	ncbi.public,s3.us-east-1,gs.US	haematopoietic_neoplasm (blast_phase_chronic_myeloid_leukaemia)	primary	Asian	SRX5414519	Illumina HiSeq 2500	cell line	RNASeq-MEG01_HAEMATOPOIETIC_AND_LYMPHOID_TISSUE	PAIRED	cDNA	TRANSCRIPTOMIC	Homo sapiens	ILLUMINA	2019-03-27T00:00:00Z	MEG01_HAEMATOPOIETIC_AND_LYMPHOID_TISSUE	cell culture	male	SRP186687	haematopoietic_and_lymphoid_tissue
SRR8615236	68	RNA-Seq	GCA_000001405.13	202	20984597694	NA	PRJNA523380	SAMN10987797	Human	10420460406	MFE-296	BROAD INSTITUTE	public	sra,bam	gs,s3,ncbi	s3.us-east-1,ncbi.public,gs.US	carcinoma (adenocarcinoma)	primary	Caucasian	SRX5414517	Illumina HiSeq 2500	cell line	RNASeq-MFE296_ENDOMETRIUM	PAIRED	cDNA	TRANSCRIPTOMIC	Homo sapiens	ILLUMINA	2019-03-27T00:00:00Z	MFE296_ENDOMETRIUM	cell culture	female	SRP186687	endometrium
SRR8615237	77	RNA-Seq	GCA_000001405.13	202	15046230176	NIBRI	PRJNA523380	SAMN10987795	Human	7097671191	MFE-280	BROAD INSTITUTE	public	sra,bam	ncbi,s3,gs	s3.us-east-1,ncbi.public,gs.US	carcinoma (adenocarcinoma)	primary	Caucasian	SRX5414516	Illumina HiSeq 2500	cell line	RNASeq-MFE280_ENDOMETRIUM	PAIRED	cDNA	TRANSCRIPTOMIC	Homo sapiens	ILLUMINA	2019-03-27T00:00:00Z	MFE280_ENDOMETRIUM	cell culture	female	SRP186687	endometrium
SRR8615238	78	RNA-Seq	GCA_000001405.13	202	14955530560	GNF	PRJNA523380	SAMN10987991	Human	7026945192	MeWo	BROAD INSTITUTE	public	bam,sra	ncbi,gs,s3	gs.US,s3.us-east-1,ncbi.public	malignant_melanoma	metastasis	Caucasian	SRX5414515	Illumina HiSeq 2500	cell line	RNASeq-MEWO_SKIN	PAIRED	cDNA	TRANSCRIPTOMIC	Homo sapiens	ILLUMINA	2019-03-27T00:00:00Z	MEWO_SKIN	cell culture	male	SRP186687	skin
SRR8615239	15	RNA-Seq	GCA_000001405.13	202	23454153340	DSMZ:MHH-CALL-2	PRJNA523380	SAMN10988567	Human	12389082905	MHH-CALL-2	BROAD INSTITUTE	public	bam,sra	gs,ncbi,s3	s3.us-east-1,ncbi.public,gs.US	lymphoid_neoplasm (acute_lymphoblastic_B_cell_leukaemia)	primary	Caucasian	SRX5414514	Illumina HiSeq 2500	cell line	RNASeq-MHHCALL2_HAEMATOPOIETIC_AND_LYMPHOID_TISSUE	PAIRED	cDNA	TRANSCRIPTOMIC	Homo sapiens	ILLUMINA	2019-03-27T00:00:00Z	MHHCALL2_HAEMATOPOIETIC_AND_LYMPHOID_TISSUE	cell culture	female	SRP186687	haematopoietic_and_lymphoid_tissue
SRR8615240	14	RNA-Seq	GCA_000001405.13	202	14113585268	NIBRI	PRJNA523380	SAMN10988146	Human	6659072614	MG-63	BROAD INSTITUTE	public	bam,sra	gs,ncbi,s3	s3.us-east-1,gs.US,ncbi.public	osteosarcoma	primary	Caucasian	SRX5414513	Illumina HiSeq 2500	cell line	RNASeq-MG63_BONE	PAIRED	cDNA	TRANSCRIPTOMIC	Homo sapiens	ILLUMINA	2019-03-27T00:00:00Z	MG63_BONE	cell culture	male	SRP186687	bone
SRR8615241	64	RNA-Seq	GCA_000001405.13	202	20745498576	NIBRI	PRJNA523380	SAMN10987902	Human	10985245996	Panc 02.13	BROAD INSTITUTE	public	sra,bam	s3,ncbi,gs	ncbi.public,s3.us-east-1,gs.US	carcinoma	primary	Caucasian	SRX5414512	Illumina HiSeq 2500	cell line	RNASeq-PANC0213_PANCREAS	PAIRED	cDNA	TRANSCRIPTOMIC	Homo sapiens	ILLUMINA	2019-03-27T00:00:00Z	PANC0213_PANCREAS	cell culture	female	SRP186687	pancreas
SRR8615243	NA	RNA-Seq	GCA_000001405.13	202	22042853272	ECACC:OAW28	PRJNA523380	SAMN10988017	Human	11587966858	OAW28	BROAD INSTITUTE	public	sra,bam	gs,ncbi,s3	gs.US,ncbi.public,s3.us-east-1	carcinoma	primary	Caucasian	SRX5414510	Illumina HiSeq 2500	cell line	RNASeq-OAW28_OVARY	PAIRED	cDNA	TRANSCRIPTOMIC	Homo sapiens	ILLUMINA	2019-03-27T00:00:00Z	OAW28_OVARY	cell culture	female	SRP186687	ovary
SRR8615244	35	RNA-Seq	GCA_000001405.13	202	14085065696	GNF	PRJNA523380	SAMN10987867	Human	7142241080	NUGC-4	BROAD INSTITUTE	public	sra,bam	s3,ncbi,gs	gs.US,ncbi.public,s3.us-east-1	carcinoma (signet_ring_adenocarcinoma)	metastasis	Asian	SRX5414509	Illumina HiSeq 2500	cell line	RNASeq-NUGC4_STOMACH	PAIRED	cDNA	TRANSCRIPTOMIC	Homo sapiens	ILLUMINA	2019-03-27T00:00:00Z	NUGC4_STOMACH	cell culture	female	SRP186687	stomach
SRR8615247	40	RNA-Seq	GCA_000001405.13	202	18927313342	ATCC:Capan-1	PRJNA523380	SAMN10987884	Human	10637759172	Capan-1	BROAD INSTITUTE	public	bam,sra	gs,s3,ncbi	gs.US,ncbi.public,s3.us-east-1	carcinoma (ductal_carcinoma)	metastasis	Caucasian	SRX5414506	Illumina HiSeq 2500	cell line	RNASeq-CAPAN1_PANCREAS	PAIRED	cDNA	TRANSCRIPTOMIC	Homo sapiens	ILLUMINA	2019-03-27T00:00:00Z	CAPAN1_PANCREAS	cell culture	male	SRP186687	pancreas
SRR8615249	63	RNA-Seq	GCA_000001405.13	202	17511403230	ICLC	PRJNA523380	SAMN10987869	Human	9320949121	CAS-1	BROAD INSTITUTE	public	bam,sra	ncbi,s3,gs	s3.us-east-1,ncbi.public,gs.US	glioma (astrocytoma_Grade_IV\, glioblastoma_multiforme)	primary	Caucasian	SRX5414504	Illumina HiSeq 2500	cell line	RNASeq-CAS1_CENTRAL_NERVOUS_SYSTEM	PAIRED	cDNA	TRANSCRIPTOMIC	Homo sapiens	ILLUMINA	2019-03-27T00:00:00Z	CAS1_CENTRAL_NERVOUS_SYSTEM	cell culture	male	SRP186687	central_nervous_system
SRR8615250	26	RNA-Seq	GCA_000001405.13	202	18152352664	NA	PRJNA523380	SAMN10987887	Human	9633205088	CFPAC-1	BROAD INSTITUTE	public	bam,sra	s3,gs,ncbi	gs.US,s3.us-east-1,ncbi.public	carcinoma (ductal_carcinoma)	metastasis	Caucasian	SRX5414503	Illumina HiSeq 2500	cell line	RNASeq-CFPAC1_PANCREAS	PAIRED	cDNA	TRANSCRIPTOMIC	Homo sapiens	ILLUMINA	2019-03-27T00:00:00Z	CFPAC1_PANCREAS	cell culture	male	SRP186687	pancreas
SRR8615252	47	RNA-Seq	GCA_000001405.13	202	20902416620	ATCC:NCI-H2073	PRJNA523380	SAMN10989581	Human	11114970587	NCI-H2073	BROAD INSTITUTE	public	bam,sra	s3,ncbi,gs	gs.US,s3.us-east-1,ncbi.public	carcinoma (adenocarcinoma)	primary	Caucasian	SRX5414501	Illumina HiSeq 2500	cell line	RNASeq-NCIH2073_LUNG	PAIRED	cDNA	TRANSCRIPTOMIC	Homo sapiens	ILLUMINA	2019-03-27T00:00:00Z	NCIH2073_LUNG	cell culture	female	SRP186687	lung
SRR8615253	70	RNA-Seq	GCA_000001405.13	202	17711333336	ATCC:NCI-H2066	PRJNA523380	SAMN10987642	Human	8498583989	NCI-H2066	BROAD INSTITUTE	public	sra,bam	gs,s3,ncbi	ncbi.public,gs.US,s3.us-east-1	carcinoma (small_cell_carcinoma)	primary	Caucasian	SRX5414500	Illumina HiSeq 2500	cell line	RNASeq-NCIH2066_LUNG	PAIRED	cDNA	TRANSCRIPTOMIC	Homo sapiens	ILLUMINA	2019-03-27T00:00:00Z	NCIH2066_LUNG	cell culture	female	SRP186687	lung
SRR8615254	65	RNA-Seq	GCA_000001405.13	202	19073141788	ATCC:NCI-H2052	PRJNA523380	SAMN10987937	Human	9201205653	NCI-H2052	BROAD INSTITUTE	public	bam,sra	gs,s3,ncbi	gs.US,ncbi.public,s3.us-east-1	mesothelioma	metastasis	Caucasian	SRX5414499	Illumina HiSeq 2500	cell line	RNASeq-NCIH2052_PLEURA	PAIRED	cDNA	TRANSCRIPTOMIC	Homo sapiens	ILLUMINA	2019-03-27T00:00:00Z	NCIH2052_PLEURA	cell culture	male	SRP186687	pleura
SRR8615255	NA	RNA-Seq	GCA_000001405.13	202	21363941574	ATCC:NCI-H2030	PRJNA523380	SAMN10988239	Human	11254186250	NCI-H2030	BROAD INSTITUTE	public	sra,bam	ncbi,s3,gs	gs.US,ncbi.public,s3.us-east-1	carcinoma (non_small_cell_carcinoma)	metastasis	Caucasian	SRX5414498	Illumina HiSeq 2500	cell line	RNASeq-NCIH2030_LUNG	PAIRED	cDNA	TRANSCRIPTOMIC	Homo sapiens	ILLUMINA	2019-03-27T00:00:00Z	NCIH2030_LUNG	cell culture	male	SRP186687	lung
SRR8615257	26	RNA-Seq	GCA_000001405.13	202	19371139258	ATCC:NCI-H2023	PRJNA523380	SAMN10988117	Human	10216004126	NCI-H2023	BROAD INSTITUTE	public	sra,bam	ncbi,gs,s3	ncbi.public,gs.US,s3.us-east-1	carcinoma (adenocarcinoma)	metastasis	Caucasian	SRX5414496	Illumina HiSeq 2500	cell line	RNASeq-NCIH2023_LUNG	PAIRED	cDNA	TRANSCRIPTOMIC	Homo sapiens	ILLUMINA	2019-03-27T00:00:00Z	NCIH2023_LUNG	cell culture	male	SRP186687	lung
SRR8615258	68	RNA-Seq	GCA_000001405.13	202	16425596266	ATCC:NCI-H2009	PRJNA523380	SAMN10988519	Human	8228424417	NCI-H2009	BROAD INSTITUTE	public	sra,bam	gs,ncbi,s3	gs.US,s3.us-east-1,ncbi.public	carcinoma (adenocarcinoma)	metastasis	Caucasian	SRX5414495	Illumina HiSeq 2500	cell line	RNASeq-NCIH2009_LUNG	PAIRED	cDNA	TRANSCRIPTOMIC	Homo sapiens	ILLUMINA	2019-03-27T00:00:00Z	NCIH2009_LUNG	cell culture	female	SRP186687	lung
SRR8615260	NA	RNA-Seq	GCA_000001405.13	202	17407564726	ATCC:NCI-H1975	PRJNA523380	SAMN10988259	Human	9316763692	NCI-H1975	BROAD INSTITUTE	public	bam,sra	gs,ncbi,s3	s3.us-east-1,gs.US,ncbi.public	carcinoma (non_small_cell_carcinoma)	primary	Caucasian	SRX5414493	Illumina HiSeq 2500	cell line	RNASeq-NCIH1975_LUNG	PAIRED	cDNA	TRANSCRIPTOMIC	Homo sapiens	ILLUMINA	2019-03-27T00:00:00Z	NCIH1975_LUNG	cell culture	female	SRP186687	lung
SRR8615262	62	RNA-Seq	GCA_000001405.13	202	15646113818	DSMZ:OCI-M1	PRJNA523380	SAMN10989554	Human	7839582387	OCI-M1	BROAD INSTITUTE	public	bam,sra	gs,s3,ncbi	s3.us-east-1,gs.US,ncbi.public	haematopoietic_neoplasm (acute_myeloid_leukaemia\, M6)	primary	Caucasian	SRX5414491	Illumina HiSeq 2500	cell line	RNASeq-OCIM1_HAEMATOPOIETIC_AND_LYMPHOID_TISSUE	PAIRED	cDNA	TRANSCRIPTOMIC	Homo sapiens	ILLUMINA	2019-03-27T00:00:00Z	OCIM1_HAEMATOPOIETIC_AND_LYMPHOID_TISSUE	cell culture	NA	SRP186687	haematopoietic_and_lymphoid_tissue
SRR8615263	NA	RNA-Seq	GCA_000001405.13	202	36788032748	ACADEMIC	PRJNA523380	SAMN10988130	Human	18333190558	OCI-LY3	BROAD INSTITUTE	public	bam,sra	ncbi,gs,s3	ncbi.public,s3.us-east-1,gs.US	lymphoid_neoplasm (diffuse_large_B_cell_lymphoma)	primary	Caucasian	SRX5414490	Illumina HiSeq 2500	cell line	RNASeq-OCILY3_HAEMATOPOIETIC_AND_LYMPHOID_TISSUE	PAIRED	cDNA	TRANSCRIPTOMIC	Homo sapiens	ILLUMINA	2019-03-27T00:00:00Z	OCILY3_HAEMATOPOIETIC_AND_LYMPHOID_TISSUE	cell culture	NA	SRP186687	haematopoietic_and_lymphoid_tissue
SRR8615264	45	RNA-Seq	GCA_000001405.13	202	16384377560	DSMZ:CAL-51	PRJNA523380	SAMN10988576	Human	8714690439	CAL-51	BROAD INSTITUTE	public	sra,bam	gs,s3,ncbi	gs.US,ncbi.public,s3.us-east-1	carcinoma	metastasis	Caucasian	SRX5414489	Illumina HiSeq 2500	cell line	RNASeq-CAL51_BREAST	PAIRED	cDNA	TRANSCRIPTOMIC	Homo sapiens	ILLUMINA	2019-03-27T00:00:00Z	CAL51_BREAST	cell culture	female	SRP186687	breast
SRR8615265	69	RNA-Seq	GCA_000001405.13	202	26010077520	DSMZ:CAL-33	PRJNA523380	SAMN10988048	Human	14626618790	CAL-33	BROAD INSTITUTE	public	sra,bam	gs,s3,ncbi	gs.US,s3.us-east-1,ncbi.public	carcinoma (squamous_cell_carcinoma)	primary	Caucasian	SRX5414488	Illumina HiSeq 2500	cell line	RNASeq-CAL33_UPPER_AERODIGESTIVE_TRACT	PAIRED	cDNA	TRANSCRIPTOMIC	Homo sapiens	ILLUMINA	2019-03-27T00:00:00Z	CAL33_UPPER_AERODIGESTIVE_TRACT	cell culture	male	SRP186687	upper_aerodigestive_tract
SRR8615266	80	RNA-Seq	GCA_000001405.13	202	22686728474	DSMZ:CAL-29	PRJNA523380	SAMN10988514	Human	12678947866	CAL-29	BROAD INSTITUTE	public	bam,sra	s3,gs,ncbi	ncbi.public,s3.us-east-1,gs.US	carcinoma (transitional_cell_carcinoma)	primary	Caucasian	SRX5414487	Illumina HiSeq 2500	cell line	RNASeq-CAL29_URINARY_TRACT	PAIRED	cDNA	TRANSCRIPTOMIC	Homo sapiens	ILLUMINA	2019-03-27T00:00:00Z	CAL29_URINARY_TRACT	cell culture	female	SRP186687	urinary_tract
SRR8615269	NA	RNA-Seq	GCA_000001405.13	202	18197054658	GNF	PRJNA523380	SAMN10987846	Human	10207438571	CAL-12T	BROAD INSTITUTE	public	bam,sra	s3,ncbi,gs	ncbi.public,s3.us-east-1,gs.US	carcinoma (non_small_cell_carcinoma)	primary	Caucasian	SRX5414484	Illumina HiSeq 2500	cell line	RNASeq-CAL12T_LUNG	PAIRED	cDNA	TRANSCRIPTOMIC	Homo sapiens	ILLUMINA	2019-03-27T00:00:00Z	CAL12T_LUNG	cell culture	male	SRP186687	lung
SRR8615271	69	RNA-Seq	GCA_000001405.13	202	21369432136	NIBRI	PRJNA523380	SAMN10988361	Human	12029003654	Caki-2	BROAD INSTITUTE	public	bam,sra	ncbi,s3,gs	s3.us-east-1,ncbi.public,gs.US	carcinoma (clear_cell_renal_cell_carcinoma)	primary	Caucasian	SRX5414482	Illumina HiSeq 2500	cell line	RNASeq-CAKI2_KIDNEY	PAIRED	cDNA	TRANSCRIPTOMIC	Homo sapiens	ILLUMINA	2019-03-27T00:00:00Z	CAKI2_KIDNEY	cell culture	male	SRP186687	kidney
SRR8615274	65	RNA-Seq	GCA_000001405.13	202	22082180450	RIKEN:EC-GI-10	PRJNA523380	SAMN10987728	Human	12377733102	EC-GI-10	BROAD INSTITUTE	public	bam,sra	ncbi,gs,s3	s3.us-east-1,ncbi.public,gs.US	carcinoma	primary	Asian	SRX5414479	Illumina HiSeq 2500	cell line	RNASeq-ECGI10_OESOPHAGUS	PAIRED	cDNA	TRANSCRIPTOMIC	Homo sapiens	ILLUMINA	2019-03-27T00:00:00Z	ECGI10_OESOPHAGUS	cell culture	male	SRP186687	oesophagus
SRR8615275	71	RNA-Seq	GCA_000001405.13	202	18984062414	NIBRI	PRJNA523380	SAMN10988293	Human	10113984519	HEC-1-A	BROAD INSTITUTE	public	bam,sra	s3,ncbi,gs	s3.us-east-1,gs.US,ncbi.public	carcinoma (adenocarcinoma)	primary	Asian	SRX5414478	Illumina HiSeq 2500	cell line	RNASeq-HEC1A_ENDOMETRIUM	PAIRED	cDNA	TRANSCRIPTOMIC	Homo sapiens	ILLUMINA	2019-03-27T00:00:00Z	HEC1A_ENDOMETRIUM	cell culture	female	SRP186687	endometrium
SRR8615276	NA	RNA-Seq	GCA_000001405.13	202	18399478050	HSSRB	PRJNA523380	SAMN10987651	Human	9047652756	HEC-151	BROAD INSTITUTE	public	sra,bam	gs,ncbi,s3	gs.US,ncbi.public,s3.us-east-1	carcinoma (adenocarcinoma)	primary	Asian	SRX5414477	Illumina HiSeq 2500	cell line	RNASeq-HEC151_ENDOMETRIUM	PAIRED	cDNA	TRANSCRIPTOMIC	Homo sapiens	ILLUMINA	2019-03-27T00:00:00Z	HEC151_ENDOMETRIUM	cell culture	female	SRP186687	endometrium
SRR8615277	NA	RNA-Seq	GCA_000001405.13	202	19740738860	HSSRB	PRJNA523380	SAMN10987841	Human	9790575952	HEC-108	BROAD INSTITUTE	public	bam,sra	ncbi,s3,gs	gs.US,ncbi.public,s3.us-east-1	carcinoma (adenocarcinoma)	primary	Asian	SRX5414476	Illumina HiSeq 2500	cell line	RNASeq-HEC108_ENDOMETRIUM	PAIRED	cDNA	TRANSCRIPTOMIC	Homo sapiens	ILLUMINA	2019-03-27T00:00:00Z	HEC108_ENDOMETRIUM	cell culture	female	SRP186687	endometrium
SRR8615278	50	RNA-Seq	GCA_000001405.13	202	18577600640	DSMZ:HDQ-P1	PRJNA523380	SAMN10988509	Human	9171920555	HDQ-P1	BROAD INSTITUTE	public	sra,bam	s3,ncbi,gs	ncbi.public,s3.us-east-1,gs.US	carcinoma (ductal_carcinoma)	primary	Caucasian	SRX5414475	Illumina HiSeq 2500	cell line	RNASeq-HDQP1_BREAST	PAIRED	cDNA	TRANSCRIPTOMIC	Homo sapiens	ILLUMINA	2019-03-27T00:00:00Z	HDQP1_BREAST	cell culture	female	SRP186687	breast
SRR8615281	NA	RNA-Seq	GCA_000001405.13	202	17097595726	NIBRI	PRJNA523380	SAMN10987770	Human	8460067159	HCT-15	BROAD INSTITUTE	public	sra,bam	ncbi,gs,s3	s3.us-east-1,ncbi.public,gs.US	carcinoma (adenocarcinoma)	primary	Caucasian	SRX5414472	Illumina HiSeq 2500	cell line	RNASeq-HCT15_LARGE_INTESTINE	PAIRED	cDNA	TRANSCRIPTOMIC	Homo sapiens	ILLUMINA	2019-03-27T00:00:00Z	HCT15_LARGE_INTESTINE	cell culture	male	SRP186687	large_intestine
SRR8615284	39	RNA-Seq	GCA_000001405.13	202	20508601864	ATCC:HCC827	PRJNA523380	SAMN10988440	Human	10868868900	HCC827	BROAD INSTITUTE	public	bam,sra	s3,gs,ncbi	ncbi.public,s3.us-east-1,gs.US	carcinoma (adenocarcinoma)	primary	Caucasian	SRX5414469	Illumina HiSeq 2500	cell line	RNASeq-HCC827_LUNG	PAIRED	cDNA	TRANSCRIPTOMIC	Homo sapiens	ILLUMINA	2019-03-27T00:00:00Z	HCC827_LUNG	cell culture	female	SRP186687	lung
SRR8615287	36	RNA-Seq	GCA_000001405.13	202	14595824514	NIBRI	PRJNA523380	SAMN10988215	Human	7266665898	EFO-27	BROAD INSTITUTE	public	bam,sra	ncbi,s3,gs	ncbi.public,s3.us-east-1,gs.US	carcinoma (mucinous_carcinoma)	metastasis	Caucasian	SRX5414466	Illumina HiSeq 2500	cell line	RNASeq-EFO27_OVARY	PAIRED	cDNA	TRANSCRIPTOMIC	Homo sapiens	ILLUMINA	2019-03-27T00:00:00Z	EFO27_OVARY	cell culture	female	SRP186687	ovary
SRR8615288	69	RNA-Seq	GCA_000001405.13	202	21129342006	DSMZ:EHEB	PRJNA523380	SAMN10988486	Human	11931034302	EHEB	BROAD INSTITUTE	public	sra,bam	s3,gs,ncbi	ncbi.public,s3.us-east-1,gs.US	lymphoid_neoplasm (chronic_lymphocytic_leukaemia-small_lymphocytic_lymphoma)	primary	Caucasian	SRX5414465	Illumina HiSeq 2500	cell line	RNASeq-EHEB_HAEMATOPOIETIC_AND_LYMPHOID_TISSUE	PAIRED	cDNA	TRANSCRIPTOMIC	Homo sapiens	ILLUMINA	2019-03-27T00:00:00Z	EHEB_HAEMATOPOIETIC_AND_LYMPHOID_TISSUE	cell culture	female	SRP186687	haematopoietic_and_lymphoid_tissue
SRR8615296	NA	RNA-Seq	GCA_000001405.13	202	16595930342	RIKEN:PK-1	PRJNA523380	SAMN10988147	Human	8293823915	PK-1	BROAD INSTITUTE	public	sra,bam	gs,s3,ncbi	ncbi.public,s3.us-east-1,gs.US	carcinoma	primary	Asian	SRX5414457	Illumina HiSeq 2500	cell line	RNASeq-PK1_PANCREAS	PAIRED	cDNA	TRANSCRIPTOMIC	Homo sapiens	ILLUMINA	2019-03-27T00:00:00Z	PK1_PANCREAS	cell culture	NA	SRP186687	pancreas
SRR8615297	62	RNA-Seq	GCA_000001405.13	202	17281331694	ATCC:DU4475	PRJNA523380	SAMN10987660	Human	8668131709	DU4475	BROAD INSTITUTE	public	sra,bam	s3,gs,ncbi	gs.US,s3.us-east-1,ncbi.public	carcinoma (ductal_carcinoma)	metastasis	Caucasian	SRX5414456	Illumina HiSeq 2500	cell line	RNASeq-DU4475_BREAST	PAIRED	cDNA	TRANSCRIPTOMIC	Homo sapiens	ILLUMINA	2019-03-27T00:00:00Z	DU4475_BREAST	cell culture	female	SRP186687	breast
SRR8615301	NA	RNA-Seq	GCA_000001405.13	202	20043657050	NA	PRJNA523380	SAMN10989619	Human	10688262627	PC9	BROAD INSTITUTE	public	bam,sra	gs,s3,ncbi	gs.US,ncbi.public,s3.us-east-1	NA	NA	NA	SRX5414452	Illumina HiSeq 2500	cell line	RNASeq-PC9_LUNG	PAIRED	cDNA	TRANSCRIPTOMIC	Homo sapiens	ILLUMINA	2019-03-27T00:00:00Z	PC9_LUNG	cell culture	NA	SRP186687	lung
SRR8615311	41	RNA-Seq	GCA_000001405.13	202	15622913512	ATCC:SNU-387	PRJNA523380	SAMN10987947	Human	7878715597	SNU-387	BROAD INSTITUTE	public	bam,sra	gs,ncbi,s3	gs.US,s3.us-east-1,ncbi.public	carcinoma (hepatocellular_carcinoma)	primary	Asian	SRX5414442	Illumina HiSeq 2500	cell line	RNASeq-SNU387_LIVER	PAIRED	cDNA	TRANSCRIPTOMIC	Homo sapiens	ILLUMINA	2019-03-27T00:00:00Z	SNU387_LIVER	cell culture	female	SRP186687	liver
SRR8615312	68	RNA-Seq	GCA_000001405.13	202	22565708456	KCLB:SNU-349	PRJNA523380	SAMN10988037	Human	12117472831	SNU-349	BROAD INSTITUTE	public	bam,sra	ncbi,s3,gs	ncbi.public,gs.US,s3.us-east-1	carcinoma (clear_cell_renal_cell_carcinoma)	primary	Asian	SRX5414441	Illumina HiSeq 2500	cell line	RNASeq-SNU349_KIDNEY	PAIRED	cDNA	TRANSCRIPTOMIC	Homo sapiens	ILLUMINA	2019-03-27T00:00:00Z	SNU349_KIDNEY	cell culture	male	SRP186687	kidney
SRR8615313	50	RNA-Seq	GCA_000001405.13	202	24185515954	KCLB:SNU-324	PRJNA523380	SAMN10987733	Human	13026281161	SNU-324	BROAD INSTITUTE	public	bam,sra	gs,ncbi,s3	s3.us-east-1,gs.US,ncbi.public	carcinoma	primary	Asian	SRX5414440	Illumina HiSeq 2500	cell line	RNASeq-SNU324_PANCREAS	PAIRED	cDNA	TRANSCRIPTOMIC	Homo sapiens	ILLUMINA	2019-03-27T00:00:00Z	SNU324_PANCREAS	cell culture	male	SRP186687	pancreas
SRR8615316	53	RNA-Seq	GCA_000001405.13	202	21454590690	KCLB:SNU-410	PRJNA523380	SAMN10988085	Human	11515923661	SNU-410	BROAD INSTITUTE	public	bam,sra	ncbi,gs,s3	ncbi.public,gs.US,s3.us-east-1	carcinoma	primary	Asian	SRX5414437	Illumina HiSeq 2500	cell line	RNASeq-SNU410_PANCREAS	PAIRED	cDNA	TRANSCRIPTOMIC	Homo sapiens	ILLUMINA	2019-03-27T00:00:00Z	SNU410_PANCREAS	cell culture	male	SRP186687	pancreas
SRR8615320	46	RNA-Seq	GCA_000001405.13	202	15285803792	NIBRI	PRJNA523380	SAMN10988214	Human	8099614603	Hs 766T	BROAD INSTITUTE	public	sra,bam	ncbi,gs,s3	gs.US,ncbi.public,s3.us-east-1	carcinoma (ductal_carcinoma)	metastasis	Caucasian	SRX5414433	Illumina HiSeq 2500	cell line	RNASeq-HS766T_PANCREAS	PAIRED	cDNA	TRANSCRIPTOMIC	Homo sapiens	ILLUMINA	2019-03-27T00:00:00Z	HS766T_PANCREAS	cell culture	male	SRP186687	pancreas
SRR8615323	9	RNA-Seq	GCA_000001405.13	202	18184076966	NIBRI	PRJNA523380	SAMN10988161	Human	8906771822	Hs 822.T	BROAD INSTITUTE	public	sra,bam	gs,s3,ncbi	ncbi.public,s3.us-east-1,gs.US	Ewings_sarcoma-peripheral_primitive_neuroectodermal_tumour	primary	Caucasian	SRX5414430	Illumina HiSeq 2500	cell line	RNASeq-HS822T_FIBROBLAST	PAIRED	cDNA	TRANSCRIPTOMIC	Homo sapiens	ILLUMINA	2019-03-27T00:00:00Z	HS822T_FIBROBLAST	cell culture	female	SRP186687	bone
SRR8615324	NA	RNA-Seq	GCA_000001405.13	202	15868148986	NA	PRJNA523380	SAMN10988445	Human	7793079429	Hs 834.T	BROAD INSTITUTE	public	sra,bam	gs,s3,ncbi	ncbi.public,s3.us-east-1,gs.US	malignant_melanoma	metastasis	Caucasian	SRX5414429	Illumina HiSeq 2500	cell line	RNASeq-HS834T_FIBROBLAST	PAIRED	cDNA	TRANSCRIPTOMIC	Homo sapiens	ILLUMINA	2019-03-27T00:00:00Z	HS834T_FIBROBLAST	cell culture	NA	SRP186687	skin
SRR8615325	60	RNA-Seq	GCA_000001405.13	202	18031715032	NIBRI	PRJNA523380	SAMN10988131	Human	8836827939	Hs 819.T	BROAD INSTITUTE	public	bam,sra	ncbi,s3,gs	gs.US,s3.us-east-1,ncbi.public	chondrosarcoma	primary	Caucasian	SRX5414428	Illumina HiSeq 2500	cell line	RNASeq-HS819T_FIBROBLAST	PAIRED	cDNA	TRANSCRIPTOMIC	Homo sapiens	ILLUMINA	2019-03-27T00:00:00Z	HS819T_FIBROBLAST	cell culture	male	SRP186687	bone
SRR8615326	31	RNA-Seq	GCA_000001405.13	202	20100999800	GNF	PRJNA523380	SAMN10988537	Human	9926228493	Hs 821.T	BROAD INSTITUTE	public	bam,sra	gs,ncbi,s3	s3.us-east-1,gs.US,ncbi.public	giant_cell_tumour	primary	Caucasian	SRX5414427	Illumina HiSeq 2500	cell line	RNASeq-HS821T_FIBROBLAST	PAIRED	cDNA	TRANSCRIPTOMIC	Homo sapiens	ILLUMINA	2019-03-27T00:00:00Z	HS821T_FIBROBLAST	cell culture	female	SRP186687	bone
SRR8615329	73	RNA-Seq	GCA_000001405.13	202	17514431008	ATCC:NCI-H1105	PRJNA523380	SAMN10987999	Human	8584437207	NCI-H1105	BROAD INSTITUTE	public	sra,bam	gs,s3,ncbi	gs.US,s3.us-east-1,ncbi.public	carcinoma (small_cell_carcinoma)	metastasis	Caucasian	SRX5414424	Illumina HiSeq 2500	cell line	RNASeq-NCIH1105_LUNG	PAIRED	cDNA	TRANSCRIPTOMIC	Homo sapiens	ILLUMINA	2019-03-27T00:00:00Z	NCIH1105_LUNG	cell culture	male	SRP186687	lung
SRR8615330	NA	RNA-Seq	GCA_000001405.13	202	18323353946	NA	PRJNA523380	SAMN10988409	Human	9816253118	SF767	BROAD INSTITUTE	public	sra,bam	ncbi,gs,s3	gs.US,ncbi.public,s3.us-east-1	glioma (astrocytoma_Grade_III-IV)	NA	Caucasian	SRX5414423	Illumina HiSeq 2500	cell line	RNASeq-SF767_CERVIX	PAIRED	cDNA	TRANSCRIPTOMIC	Homo sapiens	ILLUMINA	2019-03-27T00:00:00Z	SF767_CERVIX	cell culture	female	SRP186687	central_nervous_system
SRR8615333	NA	RNA-Seq	GCA_000001405.13	202	14373721474	Garraway Lab	PRJNA523380	SAMN10989590	Human	7142807544	UO-31	BROAD INSTITUTE	public	sra,bam	gs,s3,ncbi	gs.US,s3.us-east-1,ncbi.public	carcinoma (renal_cell_carcinoma)	primary	Caucasian	SRX5414420	Illumina HiSeq 2500	cell line	RNASeq-UO31_KIDNEY	PAIRED	cDNA	TRANSCRIPTOMIC	Homo sapiens	ILLUMINA	2019-03-27T00:00:00Z	UO31_KIDNEY	cell culture	male	SRP186687	kidney
SRR8615335	NA	RNA-Seq	GCA_000001405.13	202	12424224726	ECACC:UM-UC-1	PRJNA523380	SAMN10988038	Human	5966185868	UM-UC-1	BROAD INSTITUTE	public	bam,sra	gs,ncbi,s3	ncbi.public,s3.us-east-1,gs.US	carcinoma (transitional_cell_carcinoma)	primary	African_american	SRX5414418	Illumina HiSeq 2500	cell line	RNASeq-UMUC1_URINARY_TRACT	PAIRED	cDNA	TRANSCRIPTOMIC	Homo sapiens	ILLUMINA	2019-03-27T00:00:00Z	UMUC1_URINARY_TRACT	cell culture	male	SRP186687	urinary_tract
SRR8615336	NA	RNA-Seq	GCA_000001405.13	202	11605688406	ECACC:U-BLC1	PRJNA523380	SAMN10987727	Human	5493859425	U-BLC1	BROAD INSTITUTE	public	bam,sra	s3,ncbi,gs	ncbi.public,s3.us-east-1,gs.US	carcinoma (transitional_cell_carcinoma)	primary	African_american	SRX5414417	Illumina HiSeq 2500	cell line	RNASeq-UBLC1_URINARY_TRACT	PAIRED	cDNA	TRANSCRIPTOMIC	Homo sapiens	ILLUMINA	2019-03-27T00:00:00Z	UBLC1_URINARY_TRACT	cell culture	female	SRP186687	urinary_tract
SRR8615337	57	RNA-Seq	GCA_000001405.13	202	19189302090	ATCC:UACC-893	PRJNA523380	SAMN10988479	Human	9600967818	UACC-893	BROAD INSTITUTE	public	sra,bam	ncbi,gs,s3	gs.US,s3.us-east-1,ncbi.public	carcinoma (ductal_carcinoma)	primary	Caucasian	SRX5414416	Illumina HiSeq 2500	cell line	RNASeq-UACC893_BREAST	PAIRED	cDNA	TRANSCRIPTOMIC	Homo sapiens	ILLUMINA	2019-03-27T00:00:00Z	UACC893_BREAST	cell culture	female	SRP186687	breast
SRR8615338	43	RNA-Seq	GCA_000001405.13	202	16717514748	ATCC:UACC-812	PRJNA523380	SAMN10988448	Human	8093108678	UACC-812	BROAD INSTITUTE	public	sra,bam	ncbi,gs,s3	s3.us-east-1,ncbi.public,gs.US	carcinoma (ductal_carcinoma)	primary	Caucasian	SRX5414415	Illumina HiSeq 2500	cell line	RNASeq-UACC812_BREAST	PAIRED	cDNA	TRANSCRIPTOMIC	Homo sapiens	ILLUMINA	2019-03-27T00:00:00Z	UACC812_BREAST	cell culture	female	SRP186687	breast
SRR8615339	NA	RNA-Seq	GCA_000001405.13	202	17436431132	NA	PRJNA523380	SAMN10987794	Human	8615754130	UACC-62	BROAD INSTITUTE	public	bam,sra	s3,ncbi,gs	gs.US,ncbi.public,s3.us-east-1	malignant_melanoma	primary	Caucasian	SRX5414414	Illumina HiSeq 2500	cell line	RNASeq-UACC62_SKIN	PAIRED	cDNA	TRANSCRIPTOMIC	Homo sapiens	ILLUMINA	2019-03-27T00:00:00Z	UACC62_SKIN	cell culture	NA	SRP186687	skin
SRR8615340	NA	RNA-Seq	GCA_000001405.13	202	14275173552	NCI/DCTD	PRJNA523380	SAMN10988377	Human	7176097972	UACC-257	BROAD INSTITUTE	public	sra,bam	gs,s3,ncbi	s3.us-east-1,ncbi.public,gs.US	malignant_melanoma	primary	Caucasian	SRX5414413	Illumina HiSeq 2500	cell line	RNASeq-UACC257_SKIN	PAIRED	cDNA	TRANSCRIPTOMIC	Homo sapiens	ILLUMINA	2019-03-27T00:00:00Z	UACC257_SKIN	cell culture	NA	SRP186687	skin
SRR8615341	NA	RNA-Seq	GCA_000001405.13	202	17925385262	ATCC:NCI-H1048	PRJNA523380	SAMN10988119	Human	8902894814	NCI-H1048	BROAD INSTITUTE	public	sra,bam	ncbi,gs,s3	s3.us-east-1,ncbi.public,gs.US	carcinoma (small_cell_carcinoma)	metastasis	African_american	SRX5414412	Illumina HiSeq 2500	cell line	RNASeq-NCIH1048_LUNG	PAIRED	cDNA	TRANSCRIPTOMIC	Homo sapiens	ILLUMINA	2019-03-27T00:00:00Z	NCIH1048_LUNG	cell culture	female	SRP186687	lung
SRR8615343	23	RNA-Seq	GCA_000001405.13	202	19783351366	DSMZ:NB-4	PRJNA523380	SAMN10988571	Human	10418670918	NB-4	BROAD INSTITUTE	public	bam,sra	gs,s3,ncbi	s3.us-east-1,gs.US,ncbi.public	haematopoietic_neoplasm (acute_myeloid_leukaemia\, M3)	primary	Caucasian	SRX5414410	Illumina HiSeq 2500	cell line	RNASeq-NB4_HAEMATOPOIETIC_AND_LYMPHOID_TISSUE	PAIRED	cDNA	TRANSCRIPTOMIC	Homo sapiens	ILLUMINA	2019-03-27T00:00:00Z	NB4_HAEMATOPOIETIC_AND_LYMPHOID_TISSUE	cell culture	female	SRP186687	haematopoietic_and_lymphoid_tissue
SRR8615345	3	RNA-Seq	GCA_000001405.13	202	23457414226	JCRB:NAMALWA	PRJNA523380	SAMN10988039	Human	12648787351	NAMALWA	BROAD INSTITUTE	public	bam,sra	gs,s3,ncbi	ncbi.public,s3.us-east-1,gs.US	lymphoid_neoplasm (Burkitt_lymphoma)	primary	African_american	SRX5414408	Illumina HiSeq 2500	cell line	RNASeq-NAMALWA_HAEMATOPOIETIC_AND_LYMPHOID_TISSUE	PAIRED	cDNA	TRANSCRIPTOMIC	Homo sapiens	ILLUMINA	2019-03-27T00:00:00Z	NAMALWA_HAEMATOPOIETIC_AND_LYMPHOID_TISSUE	cell culture	female	SRP186687	haematopoietic_and_lymphoid_tissue
SRR8615346	19	RNA-Seq	GCA_000001405.13	202	16390251922	DSMZ:NALM-6	PRJNA523380	SAMN10988491	Human	8723027229	NALM-6	BROAD INSTITUTE	public	sra,bam	gs,ncbi,s3	s3.us-east-1,gs.US,ncbi.public	lymphoid_neoplasm (acute_lymphoblastic_B_cell_leukaemia)	primary	Caucasian	SRX5414407	Illumina HiSeq 2500	cell line	RNASeq-NALM6_HAEMATOPOIETIC_AND_LYMPHOID_TISSUE	PAIRED	cDNA	TRANSCRIPTOMIC	Homo sapiens	ILLUMINA	2019-03-27T00:00:00Z	NALM6_HAEMATOPOIETIC_AND_LYMPHOID_TISSUE	cell culture	male	SRP186687	haematopoietic_and_lymphoid_tissue
SRR8615349	65	RNA-Seq	GCA_000001405.13	202	22790990976	NA	PRJNA523380	SAMN10988070	Human	11445268731	KMS-20	BROAD INSTITUTE	public	sra,bam	s3,ncbi,gs	gs.US,ncbi.public,s3.us-east-1	lymphoid_neoplasm (plasma_cell_myeloma)	primary	Asian	SRX5414404	Illumina HiSeq 2500	cell line	RNASeq-KMS20_HAEMATOPOIETIC_AND_LYMPHOID_TISSUE	PAIRED	cDNA	TRANSCRIPTOMIC	Homo sapiens	ILLUMINA	2019-03-27T00:00:00Z	KMS20_HAEMATOPOIETIC_AND_LYMPHOID_TISSUE	cell culture	female	SRP186687	haematopoietic_and_lymphoid_tissue
SRR8615350	62	RNA-Seq	GCA_000001405.13	202	16195329194	HSSRB	PRJNA523380	SAMN10987817	Human	7725138375	KMS-21BM	BROAD INSTITUTE	public	bam,sra	s3,ncbi,gs	s3.us-east-1,ncbi.public,gs.US	lymphoid_neoplasm (plasma_cell_myeloma)	primary	Asian	SRX5414403	Illumina HiSeq 2500	cell line	RNASeq-KMS21BM_HAEMATOPOIETIC_AND_LYMPHOID_TISSUE	PAIRED	cDNA	TRANSCRIPTOMIC	Homo sapiens	ILLUMINA	2019-03-27T00:00:00Z	KMS21BM_HAEMATOPOIETIC_AND_LYMPHOID_TISSUE	cell culture	male	SRP186687	haematopoietic_and_lymphoid_tissue
SRR8615353	NA	RNA-Seq	GCA_000001405.13	202	14388822792	HSSRB	PRJNA523380	SAMN10988116	Human	6788408973	KMRC-3	BROAD INSTITUTE	public	sra,bam	s3,gs,ncbi	ncbi.public,gs.US,s3.us-east-1	carcinoma (clear_cell_renal_cell_carcinoma)	primary	Asian	SRX5414400	Illumina HiSeq 2500	cell line	RNASeq-KMRC3_KIDNEY	PAIRED	cDNA	TRANSCRIPTOMIC	Homo sapiens	ILLUMINA	2019-03-27T00:00:00Z	KMRC3_KIDNEY	cell culture	male	SRP186687	kidney
SRR8615354	67	RNA-Seq	GCA_000001405.13	202	12945609350	HSRRB	PRJNA523380	SAMN10987857	Human	6476829263	KMS-11	BROAD INSTITUTE	public	bam,sra	ncbi,s3,gs	ncbi.public,gs.US,s3.us-east-1	lymphoid_neoplasm (plasma_cell_myeloma)	primary	Asian	SRX5414399	Illumina HiSeq 2500	cell line	RNASeq-KMS11_HAEMATOPOIETIC_AND_LYMPHOID_TISSUE	PAIRED	cDNA	TRANSCRIPTOMIC	Homo sapiens	ILLUMINA	2019-03-27T00:00:00Z	KMS11_HAEMATOPOIETIC_AND_LYMPHOID_TISSUE	cell culture	female	SRP186687	haematopoietic_and_lymphoid_tissue
SRR8615355	NA	RNA-Seq	GCA_000001405.13	202	14700002580	HSSRB	PRJNA523380	SAMN10987836	Human	6898246004	KMRC-20	BROAD INSTITUTE	public	bam,sra	s3,gs,ncbi	ncbi.public,gs.US,s3.us-east-1	carcinoma (renal_cell_carcinoma)	primary	Asian	SRX5414398	Illumina HiSeq 2500	cell line	RNASeq-KMRC20_KIDNEY	PAIRED	cDNA	TRANSCRIPTOMIC	Homo sapiens	ILLUMINA	2019-03-27T00:00:00Z	KMRC20_KIDNEY	cell culture	NA	SRP186687	kidney
SRR8615356	NA	RNA-Seq	GCA_000001405.13	202	14726427008	HSRRB	PRJNA523380	SAMN10988363	Human	6888207864	KMRC-2	BROAD INSTITUTE	public	sra,bam	s3,gs,ncbi	gs.US,ncbi.public,s3.us-east-1	carcinoma (clear_cell_renal_cell_carcinoma)	primary	Asian	SRX5414397	Illumina HiSeq 2500	cell line	RNASeq-KMRC2_KIDNEY	PAIRED	cDNA	TRANSCRIPTOMIC	Homo sapiens	ILLUMINA	2019-03-27T00:00:00Z	KMRC2_KIDNEY	cell culture	male	SRP186687	kidney
SRR8615357	NA	RNA-Seq	GCA_000001405.13	202	12439687624	NA	PRJNA523380	SAMN10988299	Human	5912991608	KELLY	BROAD INSTITUTE	public	sra,bam	gs,s3,ncbi	s3.us-east-1,gs.US,ncbi.public	neuroblastoma	primary	Caucasian	SRX5414396	Illumina HiSeq 2500	cell line	RNASeq-KELLY_AUTONOMIC_GANGLIA	PAIRED	cDNA	TRANSCRIPTOMIC	Homo sapiens	ILLUMINA	2019-03-27T00:00:00Z	KELLY_AUTONOMIC_GANGLIA	cell culture	NA	SRP186687	autonomic_ganglia
SRR8615358	52	RNA-Seq	GCA_000001405.13	202	16472803060	RIKEN:KE-97	PRJNA523380	SAMN10987861	Human	8241923780	KE-97	BROAD INSTITUTE	public	sra,bam	s3,ncbi,gs	s3.us-east-1,gs.US,ncbi.public	lymphoid_neoplasm (plasma_cell_myeloma)	primary	Asian	SRX5414395	Illumina HiSeq 2500	cell line	RNASeq-KE97_HAEMATOPOIETIC_AND_LYMPHOID_TISSUE	PAIRED	cDNA	TRANSCRIPTOMIC	Homo sapiens	ILLUMINA	2019-03-27T00:00:00Z	KE97_HAEMATOPOIETIC_AND_LYMPHOID_TISSUE	cell culture	male	SRP186687	haematopoietic_and_lymphoid_tissue
SRR8615359	64	RNA-Seq	GCA_000001405.13	202	19304476430	GNF	PRJNA523380	SAMN10988386	Human	9597655733	PA-TU-8988T	BROAD INSTITUTE	public	bam,sra	s3,gs,ncbi	gs.US,s3.us-east-1,ncbi.public	carcinoma (ductal_carcinoma)	metastasis	Caucasian	SRX5414394	Illumina HiSeq 2500	cell line	RNASeq-PATU8988T_PANCREAS	PAIRED	cDNA	TRANSCRIPTOMIC	Homo sapiens	ILLUMINA	2019-03-27T00:00:00Z	PATU8988T_PANCREAS	cell culture	female	SRP186687	pancreas
SRR8615362	55	RNA-Seq	GCA_000001405.13	202	15126348426	ATCC:KATO III	PRJNA523380	SAMN10988331	Human	7541379313	KATO III	BROAD INSTITUTE	public	bam,sra	gs,ncbi,s3	ncbi.public,s3.us-east-1,gs.US	carcinoma (adenocarcinoma)	metastasis	Asian	SRX5414391	Illumina HiSeq 2500	cell line	RNASeq-KATOIII_STOMACH	PAIRED	cDNA	TRANSCRIPTOMIC	Homo sapiens	ILLUMINA	2019-03-27T00:00:00Z	KATOIII_STOMACH	cell culture	male	SRP186687	stomach
SRR8615363	64	RNA-Seq	GCA_000001405.13	202	14901990056	ATCC:Kasumi-6	PRJNA523380	SAMN10988477	Human	7005917681	Kasumi-6	BROAD INSTITUTE	public	bam,sra	gs,ncbi,s3	gs.US,s3.us-east-1,ncbi.public	haematopoietic_neoplasm (acute_myeloid_leukaemia\, M2)	primary	Asian	SRX5414390	Illumina HiSeq 2500	cell line	RNASeq-KASUMI6_HAEMATOPOIETIC_AND_LYMPHOID_TISSUE	PAIRED	cDNA	TRANSCRIPTOMIC	Homo sapiens	ILLUMINA	2019-03-27T00:00:00Z	KASUMI6_HAEMATOPOIETIC_AND_LYMPHOID_TISSUE	cell culture	male	SRP186687	haematopoietic_and_lymphoid_tissue
SRR8615366	77	RNA-Seq	GCA_000001405.13	202	19129438784	RIKEN:KE-39	PRJNA523380	SAMN10987859	Human	9588503743	KE-39	BROAD INSTITUTE	public	sra,bam	s3,gs,ncbi	s3.us-east-1,ncbi.public,gs.US	carcinoma	metastasis	Asian	SRX5414387	Illumina HiSeq 2500	cell line	RNASeq-KE39_STOMACH	PAIRED	cDNA	TRANSCRIPTOMIC	Homo sapiens	ILLUMINA	2019-03-27T00:00:00Z	KE39_STOMACH	cell culture	male	SRP186687	stomach
SRR8615367	27	RNA-Seq	GCA_000001405.13	202	14931186934	DSMZ:KE-37	PRJNA523380	SAMN10988503	Human	7013473223	KE-37	BROAD INSTITUTE	public	bam,sra	s3,ncbi,gs	s3.us-east-1,gs.US,ncbi.public	lymphoid_neoplasm (acute_lymphoblastic_T_cell_leukaemia)	primary	Caucasian	SRX5414386	Illumina HiSeq 2500	cell line	RNASeq-KE37_HAEMATOPOIETIC_AND_LYMPHOID_TISSUE	PAIRED	cDNA	TRANSCRIPTOMIC	Homo sapiens	ILLUMINA	2019-03-27T00:00:00Z	KE37_HAEMATOPOIETIC_AND_LYMPHOID_TISSUE	cell culture	male	SRP186687	haematopoietic_and_lymphoid_tissue
SRR8615368	17	RNA-Seq	GCA_000001405.13	202	10129131026	DSMZ:SU-DHL-5	PRJNA523380	SAMN10989557	Human	4781051323	SU-DHL-5	BROAD INSTITUTE	public	bam,sra	ncbi,s3,gs	ncbi.public,s3.us-east-1,gs.US	lymphoid_neoplasm (diffuse_large_B_cell_lymphoma)	primary	Caucasian	SRX5414385	Illumina HiSeq 2500	cell line	RNASeq-SUDHL5_HAEMATOPOIETIC_AND_LYMPHOID_TISSUE	PAIRED	cDNA	TRANSCRIPTOMIC	Homo sapiens	ILLUMINA	2019-03-27T00:00:00Z	SUDHL5_HAEMATOPOIETIC_AND_LYMPHOID_TISSUE	cell culture	female	SRP186687	haematopoietic_and_lymphoid_tissue
SRR8615369	43	RNA-Seq	GCA_000001405.13	202	17851326204	DSMZ:SU-DHL-6	PRJNA523380	SAMN10989551	Human	8709222819	SU-DHL-6	BROAD INSTITUTE	public	bam,sra	s3,ncbi,gs	s3.us-east-1,gs.US,ncbi.public	lymphoid_neoplasm (diffuse_large_B_cell_lymphoma)	metastasis	Caucasian	SRX5414384	Illumina HiSeq 2500	cell line	RNASeq-SUDHL6_HAEMATOPOIETIC_AND_LYMPHOID_TISSUE	PAIRED	cDNA	TRANSCRIPTOMIC	Homo sapiens	ILLUMINA	2019-03-27T00:00:00Z	SUDHL6_HAEMATOPOIETIC_AND_LYMPHOID_TISSUE	cell culture	male	SRP186687	haematopoietic_and_lymphoid_tissue
SRR8615371	85	RNA-Seq	GCA_000001405.13	202	14669151928	NIBRI	PRJNA523380	SAMN10988145	Human	7334573772	Panc 08.13	BROAD INSTITUTE	public	bam,sra	gs,s3,ncbi	s3.us-east-1,ncbi.public,gs.US	carcinoma (ductal_carcinoma)	primary	Caucasian	SRX5414382	Illumina HiSeq 2500	cell line	RNASeq-PANC0813_PANCREAS	PAIRED	cDNA	TRANSCRIPTOMIC	Homo sapiens	ILLUMINA	2019-03-27T00:00:00Z	PANC0813_PANCREAS	cell culture	male	SRP186687	pancreas
SRR8615373	NA	RNA-Seq	GCA_000001405.13	202	24317896856	NIBRI	PRJNA523380	SAMN10988193	Human	11386760442	ST486	BROAD INSTITUTE	public	sra,bam	ncbi,gs,s3	gs.US,ncbi.public,s3.us-east-1	lymphoid_neoplasm (Burkitt_lymphoma)	metastasis	Caucasian	SRX5414380	Illumina HiSeq 2500	cell line	RNASeq-ST486_HAEMATOPOIETIC_AND_LYMPHOID_TISSUE	PAIRED	cDNA	TRANSCRIPTOMIC	Homo sapiens	ILLUMINA	2019-03-27T00:00:00Z	ST486_HAEMATOPOIETIC_AND_LYMPHOID_TISSUE	cell culture	female	SRP186687	haematopoietic_and_lymphoid_tissue
SRR8615375	57	RNA-Seq	GCA_000001405.13	202	17084076674	NIBRI	PRJNA523380	SAMN10987701	Human	8600959951	SU.86.86	BROAD INSTITUTE	public	bam,sra	gs,s3,ncbi	ncbi.public,gs.US,s3.us-east-1	carcinoma (ductal_carcinoma)	primary	Caucasian	SRX5414378	Illumina HiSeq 2500	cell line	RNASeq-SU8686_PANCREAS	PAIRED	cDNA	TRANSCRIPTOMIC	Homo sapiens	ILLUMINA	2019-03-27T00:00:00Z	SU8686_PANCREAS	cell culture	female	SRP186687	pancreas
SRR8615376	25	RNA-Seq	GCA_000001405.13	202	17948453864	DSMZ:SU-DHL-10	PRJNA523380	SAMN10988471	Human	8929152491	SU-DHL-10	BROAD INSTITUTE	public	bam,sra	ncbi,s3,gs	ncbi.public,gs.US,s3.us-east-1	lymphoid_neoplasm (diffuse_large_B_cell_lymphoma)	metastasis	Caucasian	SRX5414377	Illumina HiSeq 2500	cell line	RNASeq-SUDHL10_HAEMATOPOIETIC_AND_LYMPHOID_TISSUE	PAIRED	cDNA	TRANSCRIPTOMIC	Homo sapiens	ILLUMINA	2019-03-27T00:00:00Z	SUDHL10_HAEMATOPOIETIC_AND_LYMPHOID_TISSUE	cell culture	male	SRP186687	haematopoietic_and_lymphoid_tissue
SRR8615378	38	RNA-Seq	GCA_000001405.13	202	19045497078	DSMZ:SU-DHL-4	PRJNA523380	SAMN10988472	Human	9467754096	SU-DHL-4	BROAD INSTITUTE	public	bam,sra	gs,ncbi,s3	ncbi.public,gs.US,s3.us-east-1	lymphoid_neoplasm (diffuse_large_B_cell_lymphoma)	metastasis	Caucasian	SRX5414375	Illumina HiSeq 2500	cell line	RNASeq-SUDHL4_HAEMATOPOIETIC_AND_LYMPHOID_TISSUE	PAIRED	cDNA	TRANSCRIPTOMIC	Homo sapiens	ILLUMINA	2019-03-27T00:00:00Z	SUDHL4_HAEMATOPOIETIC_AND_LYMPHOID_TISSUE	cell culture	male	SRP186687	haematopoietic_and_lymphoid_tissue
SRR8615379	NA	RNA-Seq	GCA_000001405.13	202	17787671358	RIKEN:GSS	PRJNA523380	SAMN10987754	Human	8878176583	GSS	BROAD INSTITUTE	public	bam,sra	gs,ncbi,s3	s3.us-east-1,gs.US,ncbi.public	carcinoma (adenocarcinoma)	metastasis	Asian	SRX5414374	Illumina HiSeq 2500	cell line	RNASeq-GSS_STOMACH	PAIRED	cDNA	TRANSCRIPTOMIC	Homo sapiens	ILLUMINA	2019-03-27T00:00:00Z	GSS_STOMACH	cell culture	NA	SRP186687	stomach
SRR8615381	71	RNA-Seq	GCA_000001405.13	202	18956062790	ECACC:GP2d	PRJNA523380	SAMN10988004	Human	10156487651	GP2d	BROAD INSTITUTE	public	bam,sra	s3,ncbi,gs	ncbi.public,gs.US,s3.us-east-1	carcinoma (adenocarcinoma)	primary	Caucasian	SRX5414372	Illumina HiSeq 2500	cell line	RNASeq-GP2D_LARGE_INTESTINE	PAIRED	cDNA	TRANSCRIPTOMIC	Homo sapiens	ILLUMINA	2019-03-27T00:00:00Z	GP2D_LARGE_INTESTINE	cell culture	female	SRP186687	large_intestine
SRR8615384	61	RNA-Seq	GCA_000001405.13	202	17848380034	RIKEN:GI-1	PRJNA523380	SAMN10987799	Human	10055980561	GI-1	BROAD INSTITUTE	public	bam,sra	s3,ncbi,gs	ncbi.public,s3.us-east-1,gs.US	glioma (gliosarcoma)	primary	Asian	SRX5414369	Illumina HiSeq 2500	cell line	RNASeq-GI1_CENTRAL_NERVOUS_SYSTEM	PAIRED	cDNA	TRANSCRIPTOMIC	Homo sapiens	ILLUMINA	2019-03-27T00:00:00Z	GI1_CENTRAL_NERVOUS_SYSTEM	cell culture	male	SRP186687	central_nervous_system
SRR8615388	37	RNA-Seq	GCA_000001405.13	202	23067344954	NIBRI	PRJNA523380	SAMN10987915	Human	12915835792	H4	BROAD INSTITUTE	public	bam,sra	s3,gs,ncbi	s3.us-east-1,ncbi.public,gs.US	glioma	primary	Caucasian	SRX5414365	Illumina HiSeq 2500	cell line	RNASeq-H4_CENTRAL_NERVOUS_SYSTEM	PAIRED	cDNA	TRANSCRIPTOMIC	Homo sapiens	ILLUMINA	2019-03-27T00:00:00Z	H4_CENTRAL_NERVOUS_SYSTEM	cell culture	male	SRP186687	central_nervous_system
SRR8615390	NA	RNA-Seq	GCA_000001405.13	202	13991256088	RIKEN:TE-8	PRJNA523380	SAMN10987746	Human	6652676346	TE-8	BROAD INSTITUTE	public	sra,bam	ncbi,s3,gs	gs.US,ncbi.public,s3.us-east-1	carcinoma (squamous_cell_carcinoma)	primary	Asian	SRX5414363	Illumina HiSeq 2500	cell line	RNASeq-TE8_OESOPHAGUS	PAIRED	cDNA	TRANSCRIPTOMIC	Homo sapiens	ILLUMINA	2019-03-27T00:00:00Z	TE8_OESOPHAGUS	cell culture	NA	SRP186687	oesophagus
SRR8615391	1	RNA-Seq	GCA_000001405.13	202	17212940352	NIBRI	PRJNA523380	SAMN10988099	Human	8066933344	KYM-1	BROAD INSTITUTE	public	bam,sra	gs,s3,ncbi	s3.us-east-1,gs.US,ncbi.public	rhabdomyosarcoma	primary	Asian	SRX5414362	Illumina HiSeq 2500	cell line	RNASeq-KYM1_SOFT_TISSUE	PAIRED	cDNA	TRANSCRIPTOMIC	Homo sapiens	ILLUMINA	2019-03-27T00:00:00Z	KYM1_SOFT_TISSUE	cell culture	NA	SRP186687	soft_tissue
SRR8615392	63	RNA-Seq	GCA_000001405.13	202	18168392272	NA	PRJNA523380	SAMN10987976	Human	9127031450	LS513	BROAD INSTITUTE	public	bam,sra	s3,ncbi,gs	gs.US,ncbi.public,s3.us-east-1	carcinoma (adenocarcinoma)	primary	Caucasian	SRX5414361	Illumina HiSeq 2500	cell line	RNASeq-LS513_LARGE_INTESTINE	PAIRED	cDNA	TRANSCRIPTOMIC	Homo sapiens	ILLUMINA	2019-03-27T00:00:00Z	LS513_LARGE_INTESTINE	cell culture	male	SRP186687	large_intestine
SRR8615393	32	RNA-Seq	GCA_000001405.13	202	17584731654	ATCC:LS411N	PRJNA523380	SAMN10988286	Human	9402735376	LS411N	BROAD INSTITUTE	public	sra,bam	ncbi,s3,gs	s3.us-east-1,gs.US,ncbi.public	carcinoma (adenocarcinoma)	primary	Caucasian	SRX5414360	Illumina HiSeq 2500	cell line	RNASeq-LS411N_LARGE_INTESTINE	PAIRED	cDNA	TRANSCRIPTOMIC	Homo sapiens	ILLUMINA	2019-03-27T00:00:00Z	LS411N_LARGE_INTESTINE	cell culture	male	SRP186687	large_intestine
SRR8615394	63	RNA-Seq	GCA_000001405.13	202	16737921192	HSRRB	PRJNA523380	SAMN10987825	Human	7842091192	LU99	BROAD INSTITUTE	public	bam,sra	gs,ncbi,s3	s3.us-east-1,ncbi.public,gs.US	carcinoma (large_cell_carcinoma)	metastasis	Asian	SRX5414359	Illumina HiSeq 2500	cell line	RNASeq-LU99_LUNG	PAIRED	cDNA	TRANSCRIPTOMIC	Homo sapiens	ILLUMINA	2019-03-27T00:00:00Z	LU99_LUNG	cell culture	male	SRP186687	lung
SRR8615395	64	RNA-Seq	GCA_000001405.13	202	13721554778	JCRB:LU65	PRJNA523380	SAMN10987648	Human	6555404662	LU65	BROAD INSTITUTE	public	bam,sra	gs,s3,ncbi	s3.us-east-1,ncbi.public,gs.US	carcinoma (non_small_cell_carcinoma)	primary	Asian	SRX5414358	Illumina HiSeq 2500	cell line	RNASeq-LU65_LUNG	PAIRED	cDNA	TRANSCRIPTOMIC	Homo sapiens	ILLUMINA	2019-03-27T00:00:00Z	LU65_LUNG	cell culture	male	SRP186687	lung
SRR8615397	56	RNA-Seq	GCA_000001405.13	202	18306360090	HSRRB	PRJNA523380	SAMN10988493	Human	9770254513	LP-1	BROAD INSTITUTE	public	bam,sra	s3,gs,ncbi	ncbi.public,s3.us-east-1,gs.US	lymphoid_neoplasm (plasma_cell_myeloma)	primary	Caucasian	SRX5414356	Illumina HiSeq 2500	cell line	RNASeq-LP1_HAEMATOPOIETIC_AND_LYMPHOID_TISSUE	PAIRED	cDNA	TRANSCRIPTOMIC	Homo sapiens	ILLUMINA	2019-03-27T00:00:00Z	LP1_HAEMATOPOIETIC_AND_LYMPHOID_TISSUE	cell culture	female	SRP186687	haematopoietic_and_lymphoid_tissue
SRR8615398	58	RNA-Seq	GCA_000001405.13	202	15513614746	NA	PRJNA523380	SAMN10988327	Human	7795959727	LS 180	BROAD INSTITUTE	public	sra,bam	s3,ncbi,gs	s3.us-east-1,gs.US,ncbi.public	carcinoma (adenocarcinoma)	primary	Caucasian	SRX5414355	Illumina HiSeq 2500	cell line	RNASeq-LS180_LARGE_INTESTINE	PAIRED	cDNA	TRANSCRIPTOMIC	Homo sapiens	ILLUMINA	2019-03-27T00:00:00Z	LS180_LARGE_INTESTINE	cell culture	female	SRP186687	large_intestine
SRR8615399	65	RNA-Seq	GCA_000001405.13	202	13398299430	NA	PRJNA523380	SAMN10987696	Human	6349181210	LS123	BROAD INSTITUTE	public	sra,bam	s3,gs,ncbi	s3.us-east-1,ncbi.public,gs.US	carcinoma (adenocarcinoma)	primary	Caucasian	SRX5414354	Illumina HiSeq 2500	cell line	RNASeq-LS123_LARGE_INTESTINE	PAIRED	cDNA	TRANSCRIPTOMIC	Homo sapiens	ILLUMINA	2019-03-27T00:00:00Z	LS123_LARGE_INTESTINE	cell culture	female	SRP186687	large_intestine
SRR8615402	72	RNA-Seq	GCA_000001405.13	202	13069340006	ECAAC	PRJNA523380	SAMN10987864	Human	6227882383	LUDLU-1	BROAD INSTITUTE	public	bam,sra	gs,ncbi,s3	s3.us-east-1,ncbi.public,gs.US	carcinoma (squamous_cell_carcinoma)	primary	Caucasian	SRX5414351	Illumina HiSeq 2500	cell line	RNASeq-LUDLU1_LUNG	PAIRED	cDNA	TRANSCRIPTOMIC	Homo sapiens	ILLUMINA	2019-03-27T00:00:00Z	LUDLU1_LUNG	cell culture	male	SRP186687	lung
SRR8615405	22	RNA-Seq	GCA_000001405.13	202	16060014848	ATCC:ACHN	PRJNA523380	SAMN10988309	Human	8523583857	ACHN	BROAD INSTITUTE	public	sra,bam	s3,gs,ncbi	gs.US,ncbi.public,s3.us-east-1	carcinoma (renal_cell_carcinoma)	metastasis	Caucasian	SRX5414348	Illumina HiSeq 2500	cell line	RNASeq-ACHN_KIDNEY	PAIRED	cDNA	TRANSCRIPTOMIC	Homo sapiens	ILLUMINA	2019-03-27T00:00:00Z	ACHN_KIDNEY	cell culture	male	SRP186687	kidney
SRR8615407	47	RNA-Seq	GCA_000001405.13	202	15890492004	HSRRB	PRJNA523380	SAMN10988302	Human	7918945022	ABC-1	BROAD INSTITUTE	public	bam,sra	gs,s3,ncbi	ncbi.public,s3.us-east-1,gs.US	carcinoma (non_small_cell_carcinoma)	primary	Asian	SRX5414346	Illumina HiSeq 2500	cell line	RNASeq-ABC1_LUNG	PAIRED	cDNA	TRANSCRIPTOMIC	Homo sapiens	ILLUMINA	2019-03-27T00:00:00Z	ABC1_LUNG	cell culture	male	SRP186687	lung
SRR8615408	64	RNA-Seq	GCA_000001405.13	202	18633988940	DSMZ:AMO-1	PRJNA523380	SAMN10989573	Human	9440138781	AMO-1	BROAD INSTITUTE	public	bam,sra	gs,ncbi,s3	ncbi.public,gs.US,s3.us-east-1	lymphoid_neoplasm (plasma_cell_myeloma)	primary	Asian	SRX5414345	Illumina HiSeq 2500	cell line	RNASeq-AMO1_HAEMATOPOIETIC_AND_LYMPHOID_TISSUE	PAIRED	cDNA	TRANSCRIPTOMIC	Homo sapiens	ILLUMINA	2019-03-27T00:00:00Z	AMO1_HAEMATOPOIETIC_AND_LYMPHOID_TISSUE	cell culture	female	SRP186687	haematopoietic_and_lymphoid_tissue
SRR8615410	36	RNA-Seq	GCA_000001405.13	202	21744199100	HSSRB	PRJNA523380	SAMN10987853	Human	11560976525	AM-38	BROAD INSTITUTE	public	sra,bam	s3,ncbi,gs	ncbi.public,s3.us-east-1,gs.US	glioma (astrocytoma_Grade_IV\, glioblastoma_multiforme)	primary	Asian	SRX5414343	Illumina HiSeq 2500	cell line	RNASeq-AM38_CENTRAL_NERVOUS_SYSTEM	PAIRED	cDNA	TRANSCRIPTOMIC	Homo sapiens	ILLUMINA	2019-03-27T00:00:00Z	AM38_CENTRAL_NERVOUS_SYSTEM	cell culture	male	SRP186687	central_nervous_system
SRR8615412	62	RNA-Seq	GCA_000001405.13	202	17024423246	ATCC:AsPC-1	PRJNA523380	SAMN10988235	Human	9059086016	AsPC-1	BROAD INSTITUTE	public	sra,bam	ncbi,s3,gs	gs.US,s3.us-east-1,ncbi.public	carcinoma (ductal_carcinoma)	metastasis	Caucasian	SRX5414341	Illumina HiSeq 2500	cell line	RNASeq-ASPC1_PANCREAS	PAIRED	cDNA	TRANSCRIPTOMIC	Homo sapiens	ILLUMINA	2019-03-27T00:00:00Z	ASPC1_PANCREAS	cell culture	female	SRP186687	pancreas
SRR8615415	37	RNA-Seq	GCA_000001405.13	202	18613539874	GNF	PRJNA523380	SAMN10988524	Human	9107033421	Hs 281.T	BROAD INSTITUTE	public	bam,sra	gs,ncbi,s3	s3.us-east-1,gs.US,ncbi.public	carcinoma	primary	Caucasian	SRX5414338	Illumina HiSeq 2500	cell line	RNASeq-HS281T_FIBROBLAST	PAIRED	cDNA	TRANSCRIPTOMIC	Homo sapiens	ILLUMINA	2019-03-27T00:00:00Z	HS281T_FIBROBLAST	cell culture	female	SRP186687	breast
SRR8615416	66	RNA-Seq	GCA_000001405.13	202	11735359882	ATCC:Hs 274.T	PRJNA523380	SAMN10988532	Human	5362223356	Hs 274.T	BROAD INSTITUTE	public	sra,bam	s3,gs,ncbi	s3.us-east-1,gs.US,ncbi.public	carcinoma	primary	Caucasian	SRX5414337	Illumina HiSeq 2500	cell line	RNASeq-HS274T_FIBROBLAST	PAIRED	cDNA	TRANSCRIPTOMIC	Homo sapiens	ILLUMINA	2019-03-27T00:00:00Z	HS274T_FIBROBLAST	cell culture	female	SRP186687	breast
SRR8615419	NA	RNA-Seq	GCA_000001405.13	202	16152941716	GNF	PRJNA523380	SAMN10988168	Human	7919752734	Hs 600.T	BROAD INSTITUTE	public	bam,sra	gs,ncbi,s3	gs.US,s3.us-east-1,ncbi.public	malignant_melanoma	primary	Caucasian	SRX5414334	Illumina HiSeq 2500	cell line	RNASeq-HS600T_FIBROBLAST	PAIRED	cDNA	TRANSCRIPTOMIC	Homo sapiens	ILLUMINA	2019-03-27T00:00:00Z	HS600T_FIBROBLAST	cell culture	NA	SRP186687	skin
SRR8615420	74	RNA-Seq	GCA_000001405.13	202	16518492632	ATCC:Hs 578T	PRJNA523380	SAMN10987893	Human	8087138455	Hs 578T	BROAD INSTITUTE	public	sra,bam	gs,s3,ncbi	ncbi.public,gs.US,s3.us-east-1	carcinoma (ductal_carcinoma)	primary	Caucasian	SRX5414333	Illumina HiSeq 2500	cell line	RNASeq-HS578T_BREAST	PAIRED	cDNA	TRANSCRIPTOMIC	Homo sapiens	ILLUMINA	2019-03-27T00:00:00Z	HS578T_BREAST	cell culture	female	SRP186687	breast
SRR8615426	55	RNA-Seq	GCA_000001405.13	202	14070943068	ECACC:COR-L88	PRJNA523380	SAMN10988006	Human	7002634832	COR-L88	BROAD INSTITUTE	public	bam,sra	gs,ncbi,s3	s3.us-east-1,gs.US,ncbi.public	carcinoma (small_cell_carcinoma)	primary	Caucasian	SRX5414327	Illumina HiSeq 2500	cell line	RNASeq-CORL88_LUNG	PAIRED	cDNA	TRANSCRIPTOMIC	Homo sapiens	ILLUMINA	2019-03-27T00:00:00Z	CORL88_LUNG	cell culture	male	SRP186687	lung
SRR8615428	63	RNA-Seq	GCA_000001405.13	202	15554046258	ECACC:COR-L311	PRJNA523380	SAMN10987984	Human	7702995433	COR-L311	BROAD INSTITUTE	public	sra,bam	ncbi,s3,gs	gs.US,ncbi.public,s3.us-east-1	carcinoma (small_cell_carcinoma)	primary	Caucasian	SRX5414325	Illumina HiSeq 2500	cell line	RNASeq-CORL311_LUNG	PAIRED	cDNA	TRANSCRIPTOMIC	Homo sapiens	ILLUMINA	2019-03-27T00:00:00Z	CORL311_LUNG	cell culture	male	SRP186687	lung
SRR8615429	67	RNA-Seq	GCA_000001405.13	202	19789082308	ECACC:COR-L47	PRJNA523380	SAMN10987980	Human	9836544453	COR-L47	BROAD INSTITUTE	public	bam,sra	ncbi,s3,gs	gs.US,ncbi.public,s3.us-east-1	carcinoma (small_cell_carcinoma)	primary	Caucasian	SRX5414324	Illumina HiSeq 2500	cell line	RNASeq-CORL47_LUNG	PAIRED	cDNA	TRANSCRIPTOMIC	Homo sapiens	ILLUMINA	2019-03-27T00:00:00Z	CORL47_LUNG	cell culture	male	SRP186687	lung
SRR8615430	28	RNA-Seq	GCA_000001405.13	202	17618020850	NA	PRJNA523380	SAMN10987605	Human	8074929458	RVH-421	BROAD INSTITUTE	public	bam,sra	ncbi,s3,gs	gs.US,s3.us-east-1,ncbi.public	malignant_melanoma	metastasis	Caucasian	SRX5414323	Illumina HiSeq 2500	cell line	RNASeq-RVH421_SKIN	PAIRED	cDNA	TRANSCRIPTOMIC	Homo sapiens	ILLUMINA	2019-03-27T00:00:00Z	RVH421_SKIN	cell culture	male	SRP186687	skin
SRR8615434	32	RNA-Seq	GCA_000001405.13	202	15641763950	ATCC:RS4;11	PRJNA523380	SAMN10987766	Human	7811476943	RS4;11	BROAD INSTITUTE	public	sra,bam	gs,ncbi,s3	s3.us-east-1,gs.US,ncbi.public	lymphoid_neoplasm (acute_lymphoblastic_B_cell_leukaemia)	primary	Caucasian	SRX5414319	Illumina HiSeq 2500	cell line	RNASeq-RS411_HAEMATOPOIETIC_AND_LYMPHOID_TISSUE	PAIRED	cDNA	TRANSCRIPTOMIC	Homo sapiens	ILLUMINA	2019-03-27T00:00:00Z	RS411_HAEMATOPOIETIC_AND_LYMPHOID_TISSUE	cell culture	female	SRP186687	haematopoietic_and_lymphoid_tissue
SRR8615438	62	RNA-Seq	GCA_000001405.13	202	16444037452	NIBRI	PRJNA523380	SAMN10987616	Human	8255720671	RMUG-S	BROAD INSTITUTE	public	sra,bam	ncbi,s3,gs	s3.us-east-1,gs.US,ncbi.public	carcinoma (adenocarcinoma)	primary	Asian	SRX5414315	Illumina HiSeq 2500	cell line	RNASeq-RMUGS_OVARY	PAIRED	cDNA	TRANSCRIPTOMIC	Homo sapiens	ILLUMINA	2019-03-27T00:00:00Z	RMUGS_OVARY	cell culture	female	SRP186687	ovary
SRR8615439	34	RNA-Seq	GCA_000001405.13	202	14986453528	NIBRI	PRJNA523380	SAMN10988355	Human	7542889814	RMG-I	BROAD INSTITUTE	public	bam,sra	gs,ncbi,s3	ncbi.public,s3.us-east-1,gs.US	carcinoma (clear_cell_carcinoma)	primary	Asian	SRX5414314	Illumina HiSeq 2500	cell line	RNASeq-RMGI_OVARY	PAIRED	cDNA	TRANSCRIPTOMIC	Homo sapiens	ILLUMINA	2019-03-27T00:00:00Z	RMGI_OVARY	cell culture	female	SRP186687	ovary
SRR8615440	73	RNA-Seq	GCA_000001405.13	202	21967753712	DSMZ:NU-DHL-1	PRJNA523380	SAMN10988456	Human	11565698922	NU-DHL-1	BROAD INSTITUTE	public	sra,bam	gs,s3,ncbi	s3.us-east-1,ncbi.public,gs.US	lymphoid_neoplasm (diffuse_large_B_cell_lymphoma)	metastasis	Caucasian	SRX5414313	Illumina HiSeq 2500	cell line	RNASeq-NUDHL1_HAEMATOPOIETIC_AND_LYMPHOID_TISSUE	PAIRED	cDNA	TRANSCRIPTOMIC	Homo sapiens	ILLUMINA	2019-03-27T00:00:00Z	NUDHL1_HAEMATOPOIETIC_AND_LYMPHOID_TISSUE	cell culture	male	SRP186687	haematopoietic_and_lymphoid_tissue
SRR8615442	NA	RNA-Seq	GCA_000001405.13	202	18558624760	HSSRB	PRJNA523380	SAMN10987927	Human	9237746997	NMC-G1	BROAD INSTITUTE	public	sra,bam	s3,gs,ncbi	ncbi.public,gs.US,s3.us-east-1	glioma	primary	Asian	SRX5414311	Illumina HiSeq 2500	cell line	RNASeq-NMCG1_CENTRAL_NERVOUS_SYSTEM	PAIRED	cDNA	TRANSCRIPTOMIC	Homo sapiens	ILLUMINA	2019-03-27T00:00:00Z	NMCG1_CENTRAL_NERVOUS_SYSTEM	cell culture	NA	SRP186687	central_nervous_system
SRR8615443	31	RNA-Seq	GCA_000001405.13	202	21865767346	HSRRB	PRJNA523380	SAMN10988550	Human	11692347150	NOMO-1	BROAD INSTITUTE	public	sra,bam	ncbi,gs,s3	s3.us-east-1,ncbi.public,gs.US	haematopoietic_neoplasm (acute_myeloid_leukaemia\, M5)	primary	Asian	SRX5414310	Illumina HiSeq 2500	cell line	RNASeq-NOMO1_HAEMATOPOIETIC_AND_LYMPHOID_TISSUE	PAIRED	cDNA	TRANSCRIPTOMIC	Homo sapiens	ILLUMINA	2019-03-27T00:00:00Z	NOMO1_HAEMATOPOIETIC_AND_LYMPHOID_TISSUE	cell culture	female	SRP186687	haematopoietic_and_lymphoid_tissue
SRR8615446	35	RNA-Seq	GCA_000001405.13	202	25270778528	HSSRB	PRJNA523380	SAMN10987830	Human	13270103654	NCO2	BROAD INSTITUTE	public	sra,bam	ncbi,gs,s3	s3.us-east-1,ncbi.public,gs.US	haematopoietic_neoplasm (chronic_myeloid_leukaemia)	primary	Asian	SRX5414307	Illumina HiSeq 2500	cell line	RNASeq-NCO2_HAEMATOPOIETIC_AND_LYMPHOID_TISSUE	PAIRED	cDNA	TRANSCRIPTOMIC	Homo sapiens	ILLUMINA	2019-03-27T00:00:00Z	NCO2_HAEMATOPOIETIC_AND_LYMPHOID_TISSUE	cell culture	female	SRP186687	haematopoietic_and_lymphoid_tissue
SRR8615447	0.75	RNA-Seq	GCA_000001405.13	202	19295179784	HSSRB	PRJNA523380	SAMN10987623	Human	10138763907	NH-6	BROAD INSTITUTE	public	bam,sra	s3,ncbi,gs	gs.US,s3.us-east-1,ncbi.public	neuroblastoma	primary	Asian	SRX5414306	Illumina HiSeq 2500	cell line	RNASeq-NH6_AUTONOMIC_GANGLIA	PAIRED	cDNA	TRANSCRIPTOMIC	Homo sapiens	ILLUMINA	2019-03-27T00:00:00Z	NH6_AUTONOMIC_GANGLIA	cell culture	female	SRP186687	autonomic_ganglia
SRR8615448	10	RNA-Seq	GCA_000001405.13	202	19307622984	DSMZ:SU-DHL-1	PRJNA523380	SAMN10988544	Human	9606357657	SU-DHL-1	BROAD INSTITUTE	public	sra,bam	s3,ncbi,gs	ncbi.public,s3.us-east-1,gs.US	lymphoid_neoplasm (anaplastic_large_cell_lymphoma)	metastasis	Caucasian	SRX5414305	Illumina HiSeq 2500	cell line	RNASeq-SUDHL1_HAEMATOPOIETIC_AND_LYMPHOID_TISSUE	PAIRED	cDNA	TRANSCRIPTOMIC	Homo sapiens	ILLUMINA	2019-03-27T00:00:00Z	SUDHL1_HAEMATOPOIETIC_AND_LYMPHOID_TISSUE	cell culture	male	SRP186687	haematopoietic_and_lymphoid_tissue
SRR8615450	72	RNA-Seq	GCA_000001405.13	202	20087577708	JHSF	PRJNA523380	SAMN10988359	Human	10341223212	NUGC-3	BROAD INSTITUTE	public	bam,sra	ncbi,gs,s3	gs.US,s3.us-east-1,ncbi.public	carcinoma	primary	Asian	SRX5414303	Illumina HiSeq 2500	cell line	RNASeq-NUGC3_STOMACH	PAIRED	cDNA	TRANSCRIPTOMIC	Homo sapiens	ILLUMINA	2019-03-27T00:00:00Z	NUGC3_STOMACH	cell culture	male	SRP186687	stomach
SRR8615454	NA	RNA-Seq	GCA_000001405.13	202	16410385060	NA	PRJNA523380	SAMN10989604	Human	8748974941	HCC515	BROAD INSTITUTE	public	sra,bam	gs,ncbi,s3	s3.us-east-1,gs.US,ncbi.public	NA	NA	NA	SRX5414299	Illumina HiSeq 2500	cell line	RNASeq-HCC515_LUNG	PAIRED	cDNA	TRANSCRIPTOMIC	Homo sapiens	ILLUMINA	2019-03-27T00:00:00Z	HCC515_LUNG	cell culture	NA	SRP186687	lung
SRR8615457	80	RNA-Seq	GCA_000001405.13	202	17405335454	DSMZ:HCC-366	PRJNA523380	SAMN10988035	Human	8611133332	HCC-366	BROAD INSTITUTE	public	bam,sra	gs,ncbi,s3	ncbi.public,gs.US,s3.us-east-1	carcinoma (mixed_adenosquamous_carcinoma)	primary	Caucasian	SRX5414296	Illumina HiSeq 2500	cell line	RNASeq-HCC366_LUNG	PAIRED	cDNA	TRANSCRIPTOMIC	Homo sapiens	ILLUMINA	2019-03-27T00:00:00Z	HCC366_LUNG	cell culture	female	SRP186687	lung
SRR8615458	50	RNA-Seq	GCA_000001405.13	202	19523122846	ATCC:HCC38	PRJNA523380	SAMN10987659	Human	9601053388	HCC38	BROAD INSTITUTE	public	bam,sra	ncbi,gs,s3	gs.US,ncbi.public,s3.us-east-1	carcinoma (ductal_carcinoma)	primary	Caucasian	SRX5414295	Illumina HiSeq 2500	cell line	RNASeq-HCC38_BREAST	PAIRED	cDNA	TRANSCRIPTOMIC	Homo sapiens	ILLUMINA	2019-03-27T00:00:00Z	HCC38_BREAST	cell culture	female	SRP186687	breast
SRR8615459	51	RNA-Seq	GCA_000001405.13	202	17735420422	ATCC:SW620	PRJNA523380	SAMN10988250	Human	8863184844	SW620	BROAD INSTITUTE	public	sra,bam	ncbi,s3,gs	gs.US,ncbi.public,s3.us-east-1	carcinoma (adenocarcinoma)	metastasis	Caucasian	SRX5414294	Illumina HiSeq 2500	cell line	RNASeq-SW620_LARGE_INTESTINE	PAIRED	cDNA	TRANSCRIPTOMIC	Homo sapiens	ILLUMINA	2019-03-27T00:00:00Z	SW620_LARGE_INTESTINE	cell culture	male	SRP186687	large_intestine
SRR8615461	NA	RNA-Seq	GCA_000001405.13	202	17091533504	NA	PRJNA523380	SAMN10988418	Human	9170368425	HCC827 GR5	BROAD INSTITUTE	public	bam,sra	s3,ncbi,gs	ncbi.public,gs.US,s3.us-east-1	carcinoma (non_small_cell_carcinoma)	NA	Caucasian	SRX5414292	Illumina HiSeq 2500	cell line	RNASeq-HCC827GR5_LUNG	PAIRED	cDNA	TRANSCRIPTOMIC	Homo sapiens	ILLUMINA	2019-03-27T00:00:00Z	HCC827GR5_LUNG	cell culture	NA	SRP186687	lung
SRR8615462	69	RNA-Seq	GCA_000001405.13	202	15811281946	NIBRI	PRJNA523380	SAMN10988329	Human	7715511458	NCI-H747	BROAD INSTITUTE	public	sra,bam	s3,gs,ncbi	gs.US,s3.us-east-1,ncbi.public	carcinoma (adenocarcinoma)	metastasis	Caucasian	SRX5414291	Illumina HiSeq 2500	cell line	RNASeq-NCIH747_LARGE_INTESTINE	PAIRED	cDNA	TRANSCRIPTOMIC	Homo sapiens	ILLUMINA	2019-03-27T00:00:00Z	NCIH747_LARGE_INTESTINE	cell culture	male	SRP186687	large_intestine
SRR8615464	NA	RNA-Seq	GCA_000001405.13	202	21512938794	JCRB:TE-1	PRJNA523380	SAMN10988294	Human	10731939442	TE-1	BROAD INSTITUTE	public	bam,sra	gs,s3,ncbi	gs.US,s3.us-east-1,ncbi.public	carcinoma (squamous_cell_carcinoma)	primary	Asian	SRX5414289	Illumina HiSeq 2500	cell line	RNASeq-TE1_OESOPHAGUS	PAIRED	cDNA	TRANSCRIPTOMIC	Homo sapiens	ILLUMINA	2019-03-27T00:00:00Z	TE1_OESOPHAGUS	cell culture	male	SRP186687	oesophagus
SRR8615465	65	RNA-Seq	GCA_000001405.13	202	22340306958	ATCC:NCI-H727	PRJNA523380	SAMN10988551	Human	11797525092	NCI-H727	BROAD INSTITUTE	public	bam,sra	s3,ncbi,gs	gs.US,ncbi.public,s3.us-east-1	carcinoid-endocrine_tumour	primary	Caucasian	SRX5414288	Illumina HiSeq 2500	cell line	RNASeq-NCIH727_LUNG	PAIRED	cDNA	TRANSCRIPTOMIC	Homo sapiens	ILLUMINA	2019-03-27T00:00:00Z	NCIH727_LUNG	cell culture	female	SRP186687	lung
SRR8615467	NA	RNA-Seq	GCA_000001405.13	202	14862254636	RIKEN:TE-6	PRJNA523380	SAMN10987703	Human	7266218166	TE-6	BROAD INSTITUTE	public	sra,bam	ncbi,gs,s3	s3.us-east-1,gs.US,ncbi.public	carcinoma (squamous_cell_carcinoma)	primary	Asian	SRX5414286	Illumina HiSeq 2500	cell line	RNASeq-TE6_OESOPHAGUS	PAIRED	cDNA	TRANSCRIPTOMIC	Homo sapiens	ILLUMINA	2019-03-27T00:00:00Z	TE6_OESOPHAGUS	cell culture	NA	SRP186687	oesophagus
SRR8615470	NA	RNA-Seq	GCA_000001405.13	202	12096084008	RIKEN:TE-4	PRJNA523380	SAMN10987722	Human	5789228790	TE-4	BROAD INSTITUTE	public	sra,bam	gs,ncbi,s3	s3.us-east-1,gs.US,ncbi.public	carcinoma (squamous_cell_carcinoma)	primary	Asian	SRX5414283	Illumina HiSeq 2500	cell line	RNASeq-TE4_OESOPHAGUS	PAIRED	cDNA	TRANSCRIPTOMIC	Homo sapiens	ILLUMINA	2019-03-27T00:00:00Z	TE4_OESOPHAGUS	cell culture	NA	SRP186687	oesophagus
SRR8615473	45	RNA-Seq	GCA_000001405.13	202	16926656458	KCLB:SNU-840	PRJNA523380	SAMN10988093	Human	8511298441	SNU-840	BROAD INSTITUTE	public	bam,sra	ncbi,gs,s3	s3.us-east-1,ncbi.public,gs.US	carcinoma (Brenner_tumour)	primary	Asian	SRX5414280	Illumina HiSeq 2500	cell line	RNASeq-SNU840_OVARY	PAIRED	cDNA	TRANSCRIPTOMIC	Homo sapiens	ILLUMINA	2019-03-27T00:00:00Z	SNU840_OVARY	cell culture	female	SRP186687	ovary
SRR8615474	NA	RNA-Seq	GCA_000001405.13	202	30854078526	NA	PRJNA523380	SAMN10988091	Human	15449491831	SNU-869	BROAD INSTITUTE	public	sra,bam	gs,ncbi,s3	ncbi.public,gs.US,s3.us-east-1	carcinoma	primary	Asian	SRX5414279	Illumina HiSeq 2500	cell line	RNASeq-SNU869_BILIARY_TRACT	PAIRED	cDNA	TRANSCRIPTOMIC	Homo sapiens	ILLUMINA	2019-03-27T00:00:00Z	SNU869_BILIARY_TRACT	cell culture	NA	SRP186687	biliary_tract
SRR8615475	71	RNA-Seq	GCA_000001405.13	202	16721778564	NIBRI	PRJNA523380	SAMN10988188	Human	8370522876	SNU-C1	BROAD INSTITUTE	public	sra,bam	s3,ncbi,gs	s3.us-east-1,gs.US,ncbi.public	carcinoma (adenocarcinoma)	metastasis	Asian	SRX5414278	Illumina HiSeq 2500	cell line	RNASeq-SNUC1_LARGE_INTESTINE	PAIRED	cDNA	TRANSCRIPTOMIC	Homo sapiens	ILLUMINA	2019-03-27T00:00:00Z	SNUC1_LARGE_INTESTINE	cell culture	male	SRP186687	large_intestine
SRR8615476	43	RNA-Seq	GCA_000001405.13	202	17006596140	NIBRI	PRJNA523380	SAMN10987650	Human	8563152607	SNU-C2A	BROAD INSTITUTE	public	sra,bam	gs,ncbi,s3	gs.US,ncbi.public,s3.us-east-1	carcinoma (adenocarcinoma)	primary	Asian	SRX5414277	Illumina HiSeq 2500	cell line	RNASeq-SNUC2A_LARGE_INTESTINE	PAIRED	cDNA	TRANSCRIPTOMIC	Homo sapiens	ILLUMINA	2019-03-27T00:00:00Z	SNUC2A_LARGE_INTESTINE	cell culture	female	SRP186687	large_intestine
SRR8615479	34	RNA-Seq	GCA_000001405.13	202	15542995848	DSMZ:L-1236	PRJNA523380	SAMN10987806	Human	7305498943	L-1236	BROAD INSTITUTE	public	sra,bam	s3,gs,ncbi	gs.US,ncbi.public,s3.us-east-1	lymphoid_neoplasm (Hodgkin_lymphoma)	primary	Caucasian	SRX5414274	Illumina HiSeq 2500	cell line	RNASeq-L1236_HAEMATOPOIETIC_AND_LYMPHOID_TISSUE	PAIRED	cDNA	TRANSCRIPTOMIC	Homo sapiens	ILLUMINA	2019-03-27T00:00:00Z	L1236_HAEMATOPOIETIC_AND_LYMPHOID_TISSUE	cell culture	male	SRP186687	haematopoietic_and_lymphoid_tissue
SRR8615480	NA	RNA-Seq	GCA_000001405.13	202	19077068668	Academic Lab	PRJNA523380	SAMN10988255	Human	10219189435	L3.3	BROAD INSTITUTE	public	sra,bam	ncbi,gs,s3	gs.US,s3.us-east-1,ncbi.public	carcinoma	metastasis	African_american	SRX5414273	Illumina HiSeq 2500	cell line	RNASeq-L33_PANCREAS	PAIRED	cDNA	TRANSCRIPTOMIC	Homo sapiens	ILLUMINA	2019-03-27T00:00:00Z	L33_PANCREAS	cell culture	NA	SRP186687	pancreas
SRR8615483	50	RNA-Seq	GCA_000001405.13	202	14849920314	HSRRB	PRJNA523380	SAMN10987777	Human	7287174340	JHH-1	BROAD INSTITUTE	public	bam,sra	gs,s3,ncbi	s3.us-east-1,gs.US,ncbi.public	carcinoma (hepatocellular_carcinoma)	primary	Asian	SRX5414270	Illumina HiSeq 2500	cell line	RNASeq-JHH1_LIVER	PAIRED	cDNA	TRANSCRIPTOMIC	Homo sapiens	ILLUMINA	2019-03-27T00:00:00Z	JHH1_LIVER	cell culture	male	SRP186687	liver
SRR8615484	NA	RNA-Seq	GCA_000001405.13	202	16625606768	NA	PRJNA523380	SAMN10988422	Human	8972531697	JH-EsoAd1	BROAD INSTITUTE	public	sra,bam	ncbi,s3,gs	s3.us-east-1,ncbi.public,gs.US	carcinoma (barrett_associated_adenocarcinoma)	NA	NA	SRX5414269	Illumina HiSeq 2500	cell line	RNASeq-JHESOAD1_OESOPHAGUS	PAIRED	cDNA	TRANSCRIPTOMIC	Homo sapiens	ILLUMINA	2019-03-27T00:00:00Z	JHESOAD1_OESOPHAGUS	cell culture	male	SRP186687	oesophagus
SRR8615488	70	RNA-Seq	GCA_000001405.13	202	15566240190	GNF	PRJNA523380	SAMN10987671	Human	7792990291	IST-MES1	BROAD INSTITUTE	public	sra,bam	ncbi,s3,gs	ncbi.public,gs.US,s3.us-east-1	mesothelioma	primary	Caucasian	SRX5414265	Illumina HiSeq 2500	cell line	RNASeq-ISTMES1_PLEURA	PAIRED	cDNA	TRANSCRIPTOMIC	Homo sapiens	ILLUMINA	2019-03-27T00:00:00Z	ISTMES1_PLEURA	cell culture	female	SRP186687	pleura
SRR8615493	39	RNA-Seq	GCA_000001405.13	202	18186692664	NA	PRJNA523380	SAMN10988025	Human	9026381074	Ishikawa (Heraklio) 02 ER-	BROAD INSTITUTE	public	sra,bam	gs,ncbi,s3	ncbi.public,gs.US,s3.us-east-1	carcinoma (adenocarcinoma)	primary	Asian	SRX5414260	Illumina HiSeq 2500	cell line	RNASeq-ISHIKAWAHERAKLIO02ER_ENDOMETRIUM	PAIRED	cDNA	TRANSCRIPTOMIC	Homo sapiens	ILLUMINA	2019-03-27T00:00:00Z	ISHIKAWAHERAKLIO02ER_ENDOMETRIUM	cell culture	female	SRP186687	endometrium
SRR8615494	64	RNA-Seq	GCA_000001405.13	202	12162550694	DSMZ:IPC-298	PRJNA523380	SAMN10988211	Human	6106759610	IPC-298	BROAD INSTITUTE	public	bam,sra	s3,ncbi,gs	gs.US,s3.us-east-1,ncbi.public	malignant_melanoma	primary	Caucasian	SRX5414259	Illumina HiSeq 2500	cell line	RNASeq-IPC298_SKIN	PAIRED	cDNA	TRANSCRIPTOMIC	Homo sapiens	ILLUMINA	2019-03-27T00:00:00Z	IPC298_SKIN	cell culture	female	SRP186687	skin
SRR8615495	NA	RNA-Seq	GCA_000001405.13	202	34906883912	NA	PRJNA523380	SAMN10987913	Human	18595334368	NCI-N87	BROAD INSTITUTE	public	bam,sra	gs,ncbi,s3	gs.US,ncbi.public,s3.us-east-1	carcinoma	metastasis	African_american	SRX5414258	Illumina HiSeq 2500	cell line	RNASeq-NCIN87_STOMACH	PAIRED	cDNA	TRANSCRIPTOMIC	Homo sapiens	ILLUMINA	2019-03-27T00:00:00Z	NCIN87_STOMACH	cell culture	male	SRP186687	stomach
SRR8615499	NA	RNA-Seq	GCA_000001405.13	202	12618949494	NA	PRJNA523380	SAMN10989620	Human	5775185200	SKNEP1	BROAD INSTITUTE	public	sra,bam	ncbi,gs,s3	gs.US,s3.us-east-1,ncbi.public	NA	NA	NA	SRX5414254	Illumina HiSeq 2500	cell line	RNASeq-SKNEP1_BONE	PAIRED	cDNA	TRANSCRIPTOMIC	Homo sapiens	ILLUMINA	2019-03-27T00:00:00Z	SKNEP1_BONE	cell culture	NA	SRP186687	bone
SRR8615501	2.166667	RNA-Seq	GCA_000001405.13	202	21468270534	GNF	PRJNA523380	SAMN10988136	Human	11589607103	SK-N-BE(2)	BROAD INSTITUTE	public	bam,sra	gs,s3,ncbi	s3.us-east-1,gs.US,ncbi.public	neuroblastoma	metastasis	Caucasian	SRX5414252	Illumina HiSeq 2500	cell line	RNASeq-SKNBE2_AUTONOMIC_GANGLIA	PAIRED	cDNA	TRANSCRIPTOMIC	Homo sapiens	ILLUMINA	2019-03-27T00:00:00Z	SKNBE2_AUTONOMIC_GANGLIA	cell culture	male	SRP186687	autonomic_ganglia
SRR8615503	54	RNA-Seq	GCA_000001405.13	202	18402175356	DSMZ:SK-MM-2	PRJNA523380	SAMN10988476	Human	9246414098	SK-MM-2	BROAD INSTITUTE	public	sra,bam	gs,s3,ncbi	ncbi.public,s3.us-east-1,gs.US	lymphoid_neoplasm (plasma_cell_myeloma)	primary	Caucasian	SRX5414250	Illumina HiSeq 2500	cell line	RNASeq-SKMM2_HAEMATOPOIETIC_AND_LYMPHOID_TISSUE	PAIRED	cDNA	TRANSCRIPTOMIC	Homo sapiens	ILLUMINA	2019-03-27T00:00:00Z	SKMM2_HAEMATOPOIETIC_AND_LYMPHOID_TISSUE	cell culture	male	SRP186687	haematopoietic_and_lymphoid_tissue
SRR8615505	64	RNA-Seq	GCA_000001405.13	202	14020907466	NIBRI	PRJNA523380	SAMN10987874	Human	7045936790	SK-OV-3	BROAD INSTITUTE	public	bam,sra	ncbi,s3,gs	ncbi.public,s3.us-east-1,gs.US	carcinoma (adenocarcinoma)	metastasis	Caucasian	SRX5414248	Illumina HiSeq 2500	cell line	RNASeq-SKOV3_OVARY	PAIRED	cDNA	TRANSCRIPTOMIC	Homo sapiens	ILLUMINA	2019-03-27T00:00:00Z	SKOV3_OVARY	cell culture	female	SRP186687	ovary
SRR8615506	4	RNA-Seq	GCA_000001405.13	202	17167265122	ATCC:SK-N-SH	PRJNA523380	SAMN10987849	Human	7868653978	SK-N-SH	BROAD INSTITUTE	public	bam,sra	s3,ncbi,gs	s3.us-east-1,ncbi.public,gs.US	neuroblastoma	metastasis	Caucasian	SRX5414247	Illumina HiSeq 2500	cell line	RNASeq-SKNSH_AUTONOMIC_GANGLIA	PAIRED	cDNA	TRANSCRIPTOMIC	Homo sapiens	ILLUMINA	2019-03-27T00:00:00Z	SKNSH_AUTONOMIC_GANGLIA	cell culture	female	SRP186687	autonomic_ganglia
SRR8615508	45	RNA-Seq	GCA_000001405.13	202	21608072714	NA	PRJNA523380	SAMN10987815	Human	11568516098	Caov-4	BROAD INSTITUTE	public	bam,sra	s3,gs,ncbi	gs.US,ncbi.public,s3.us-east-1	carcinoma (adenocarcinoma)	metastasis	Caucasian	SRX5414245	Illumina HiSeq 2500	cell line	RNASeq-CAOV4_OVARY	PAIRED	cDNA	TRANSCRIPTOMIC	Homo sapiens	ILLUMINA	2019-03-27T00:00:00Z	CAOV4_OVARY	cell culture	female	SRP186687	ovary
SRR8615511	59	RNA-Seq	GCA_000001405.13	202	18299975476	GNF	PRJNA523380	SAMN10987615	Human	9050642134	KYSE-450	BROAD INSTITUTE	public	sra,bam	ncbi,s3,gs	s3.us-east-1,ncbi.public,gs.US	carcinoma (squamous_cell_carcinoma)	primary	Asian	SRX5414242	Illumina HiSeq 2500	cell line	RNASeq-KYSE450_OESOPHAGUS	PAIRED	cDNA	TRANSCRIPTOMIC	Homo sapiens	ILLUMINA	2019-03-27T00:00:00Z	KYSE450_OESOPHAGUS	cell culture	male	SRP186687	oesophagus
SRR8615513	39	RNA-Seq	GCA_000001405.13	202	17455006244	ICLC	PRJNA523380	SAMN10988194	Human	8774739090	OC 314	BROAD INSTITUTE	public	bam,sra	ncbi,gs,s3	gs.US,s3.us-east-1,ncbi.public	carcinoma (serous_carcinoma)	metastasis	Caucasian	SRX5414240	Illumina HiSeq 2500	cell line	RNASeq-OC314_OVARY	PAIRED	cDNA	TRANSCRIPTOMIC	Homo sapiens	ILLUMINA	2019-03-27T00:00:00Z	OC314_OVARY	cell culture	female	SRP186687	ovary
SRR8615514	NA	RNA-Seq	GCA_000001405.13	202	20120711970	ECACC:OAW42	PRJNA523380	SAMN10988015	Human	10704988669	OAW42	BROAD INSTITUTE	public	bam,sra	ncbi,s3,gs	gs.US,s3.us-east-1,ncbi.public	carcinoma	metastasis	Caucasian	SRX5414239	Illumina HiSeq 2500	cell line	RNASeq-OAW42_OVARY	PAIRED	cDNA	TRANSCRIPTOMIC	Homo sapiens	ILLUMINA	2019-03-27T00:00:00Z	OAW42_OVARY	cell culture	female	SRP186687	ovary
SRR8615515	62	RNA-Seq	GCA_000001405.13	202	19138886122	HSRRB	PRJNA523380	SAMN10988555	Human	9427433378	MKN-45	BROAD INSTITUTE	public	sra,bam	s3,ncbi,gs	gs.US,s3.us-east-1,ncbi.public	carcinoma (diffuse_adenocarcinoma)	metastasis	Asian	SRX5414238	Illumina HiSeq 2500	cell line	RNASeq-MKN45_STOMACH	PAIRED	cDNA	TRANSCRIPTOMIC	Homo sapiens	ILLUMINA	2019-03-27T00:00:00Z	MKN45_STOMACH	cell culture	female	SRP186687	stomach
SRR8615516	37	RNA-Seq	GCA_000001405.13	202	18549219640	HSSRB	PRJNA523380	SAMN10987828	Human	9203515580	MKN74	BROAD INSTITUTE	public	bam,sra	ncbi,gs,s3	gs.US,ncbi.public,s3.us-east-1	carcinoma (tubular_adenocarcinoma)	metastasis	Asian	SRX5414237	Illumina HiSeq 2500	cell line	RNASeq-MKN74_STOMACH	PAIRED	cDNA	TRANSCRIPTOMIC	Homo sapiens	ILLUMINA	2019-03-27T00:00:00Z	MKN74_STOMACH	cell culture	male	SRP186687	stomach
SRR8615518	72	RNA-Seq	GCA_000001405.13	202	20851476462	HSSRB	PRJNA523380	SAMN10987827	Human	11015581026	MKN1	BROAD INSTITUTE	public	bam,sra	gs,s3,ncbi	gs.US,s3.us-east-1,ncbi.public	carcinoma (mixed_adenosquamous_carcinoma)	metastasis	Asian	SRX5414235	Illumina HiSeq 2500	cell line	RNASeq-MKN1_STOMACH	PAIRED	cDNA	TRANSCRIPTOMIC	Homo sapiens	ILLUMINA	2019-03-27T00:00:00Z	MKN1_STOMACH	cell culture	male	SRP186687	stomach
SRR8615521	12	RNA-Seq	GCA_000001405.13	202	20773700200	DSMZ:MHH-ES-1	PRJNA523380	SAMN10988548	Human	10961032751	MHH-ES-1	BROAD INSTITUTE	public	bam,sra	gs,ncbi,s3	gs.US,ncbi.public,s3.us-east-1	Ewings_sarcoma-peripheral_primitive_neuroectodermal_tumour	metastasis	Caucasian	SRX5414232	Illumina HiSeq 2500	cell line	RNASeq-MHHES1_BONE	PAIRED	cDNA	TRANSCRIPTOMIC	Homo sapiens	ILLUMINA	2019-03-27T00:00:00Z	MHHES1_BONE	cell culture	male	SRP186687	bone
SRR8615524	10	RNA-Seq	GCA_000001405.13	202	15622277212	DSMZ:MHH-CALL-4	PRJNA523380	SAMN10988510	Human	8313643615	MHH-CALL-4	BROAD INSTITUTE	public	bam,sra	ncbi,s3,gs	gs.US,s3.us-east-1,ncbi.public	lymphoid_neoplasm (acute_lymphoblastic_B_cell_leukaemia)	primary	Caucasian	SRX5414229	Illumina HiSeq 2500	cell line	RNASeq-MHHCALL4_HAEMATOPOIETIC_AND_LYMPHOID_TISSUE	PAIRED	cDNA	TRANSCRIPTOMIC	Homo sapiens	ILLUMINA	2019-03-27T00:00:00Z	MHHCALL4_HAEMATOPOIETIC_AND_LYMPHOID_TISSUE	cell culture	male	SRP186687	haematopoietic_and_lymphoid_tissue
SRR8615525	60	RNA-Seq	GCA_000001405.13	202	21830836092	KCLB:SNU-1076	PRJNA523380	SAMN10988066	Human	11768990885	SNU-1076	BROAD INSTITUTE	public	sra,bam	gs,ncbi,s3	ncbi.public,s3.us-east-1,gs.US	carcinoma (squamous_cell_carcinoma)	primary	Asian	SRX5414228	Illumina HiSeq 2500	cell line	RNASeq-SNU1076_UPPER_AERODIGESTIVE_TRACT	PAIRED	cDNA	TRANSCRIPTOMIC	Homo sapiens	ILLUMINA	2019-03-27T00:00:00Z	SNU1076_UPPER_AERODIGESTIVE_TRACT	cell culture	male	SRP186687	upper_aerodigestive_tract
SRR8615526	1.166667	RNA-Seq	GCA_000001405.13	202	20409543892	DSMZ:CHP-126	PRJNA523380	SAMN10988481	Human	11448937461	CHP-126	BROAD INSTITUTE	public	bam,sra	ncbi,s3,gs	gs.US,s3.us-east-1,ncbi.public	neuroblastoma	primary	Caucasian	SRX5414227	Illumina HiSeq 2500	cell line	RNASeq-CHP126_AUTONOMIC_GANGLIA	PAIRED	cDNA	TRANSCRIPTOMIC	Homo sapiens	ILLUMINA	2019-03-27T00:00:00Z	CHP126_AUTONOMIC_GANGLIA	cell culture	female	SRP186687	autonomic_ganglia
SRR8615528	35	RNA-Seq	GCA_000001405.13	202	23362983064	DSMZ:CAL-85-1	PRJNA523380	SAMN10988345	Human	13065824333	CAL-85-1	BROAD INSTITUTE	public	bam,sra	gs,ncbi,s3	s3.us-east-1,ncbi.public,gs.US	carcinoma	primary	Caucasian	SRX5414225	Illumina HiSeq 2500	cell line	RNASeq-CAL851_BREAST	PAIRED	cDNA	TRANSCRIPTOMIC	Homo sapiens	ILLUMINA	2019-03-27T00:00:00Z	CAL851_BREAST	cell culture	female	SRP186687	breast
SRR8615529	32	RNA-Seq	GCA_000001405.13	202	21878895730	NIBRI	PRJNA523380	SAMN10988040	Human	11544158499	NCI-H292	BROAD INSTITUTE	public	bam,sra	s3,ncbi,gs	s3.us-east-1,ncbi.public,gs.US	carcinoma (mucoepidermoid_carcinoma)	metastasis	African_american	SRX5414224	Illumina HiSeq 2500	cell line	RNASeq-NCIH292_LUNG	PAIRED	cDNA	TRANSCRIPTOMIC	Homo sapiens	ILLUMINA	2019-03-27T00:00:00Z	NCIH292_LUNG	cell culture	female	SRP186687	lung
SRR8615532	51	RNA-Seq	GCA_000001405.13	202	24996646146	ATCC:CAMA-1	PRJNA523380	SAMN10987851	Human	14042823961	CAMA-1	BROAD INSTITUTE	public	bam,sra	ncbi,gs,s3	ncbi.public,gs.US,s3.us-east-1	carcinoma	metastasis	Caucasian	SRX5414221	Illumina HiSeq 2500	cell line	RNASeq-CAMA1_BREAST	PAIRED	cDNA	TRANSCRIPTOMIC	Homo sapiens	ILLUMINA	2019-03-27T00:00:00Z	CAMA1_BREAST	cell culture	female	SRP186687	breast
SRR8615533	47	RNA-Seq	GCA_000001405.13	202	17979498234	NIBRI	PRJNA523380	SAMN10988371	Human	8853780046	Calu-1	BROAD INSTITUTE	public	bam,sra	gs,ncbi,s3	gs.US,s3.us-east-1,ncbi.public	carcinoma (squamous_cell_carcinoma)	metastasis	Caucasian	SRX5414220	Illumina HiSeq 2500	cell line	RNASeq-CALU1_LUNG	PAIRED	cDNA	TRANSCRIPTOMIC	Homo sapiens	ILLUMINA	2019-03-27T00:00:00Z	CALU1_LUNG	cell culture	male	SRP186687	lung
SRR8615535	47	RNA-Seq	GCA_000001405.13	202	19470463062	NA	PRJNA523380	SAMN10988539	Human	10319916974	NCI-H2405	BROAD INSTITUTE	public	bam,sra	s3,ncbi,gs	s3.us-east-1,gs.US,ncbi.public	carcinoma (adenocarcinoma)	metastasis	Caucasian	SRX5414218	Illumina HiSeq 2500	cell line	RNASeq-NCIH2405_LUNG	PAIRED	cDNA	TRANSCRIPTOMIC	Homo sapiens	ILLUMINA	2019-03-27T00:00:00Z	NCIH2405_LUNG	cell culture	male	SRP186687	lung
SRR8615536	NA	RNA-Seq	GCA_000001405.13	202	22123502176	ATCC:NCI-H2444	PRJNA523380	SAMN10988376	Human	11628419642	NCI-H2444	BROAD INSTITUTE	public	bam,sra	ncbi,gs,s3	ncbi.public,s3.us-east-1,gs.US	carcinoma (non_small_cell_carcinoma)	primary	Caucasian	SRX5414217	Illumina HiSeq 2500	cell line	RNASeq-NCIH2444_LUNG	PAIRED	cDNA	TRANSCRIPTOMIC	Homo sapiens	ILLUMINA	2019-03-27T00:00:00Z	NCIH2444_LUNG	cell culture	male	SRP186687	lung
SRR8615537	54	RNA-Seq	GCA_000001405.13	202	20559176806	ATCC:NCI-H2347	PRJNA523380	SAMN10987629	Human	10873345911	NCI-H2347	BROAD INSTITUTE	public	bam,sra	ncbi,gs,s3	gs.US,s3.us-east-1,ncbi.public	carcinoma (adenocarcinoma)	primary	Caucasian	SRX5414216	Illumina HiSeq 2500	cell line	RNASeq-NCIH2347_LUNG	PAIRED	cDNA	TRANSCRIPTOMIC	Homo sapiens	ILLUMINA	2019-03-27T00:00:00Z	NCIH2347_LUNG	cell culture	female	SRP186687	lung
SRR8615538	51	RNA-Seq	GCA_000001405.13	202	20661716248	ATCC:NCI-H23	PRJNA523380	SAMN10988149	Human	11037837816	NCI-H23	BROAD INSTITUTE	public	bam,sra	s3,gs,ncbi	gs.US,ncbi.public,s3.us-east-1	carcinoma (non_small_cell_carcinoma)	primary	African_american	SRX5414215	Illumina HiSeq 2500	cell line	RNASeq-NCIH23_LUNG	PAIRED	cDNA	TRANSCRIPTOMIC	Homo sapiens	ILLUMINA	2019-03-27T00:00:00Z	NCIH23_LUNG	cell culture	male	SRP186687	lung
SRR8615539	NA	RNA-Seq	GCA_000001405.13	202	18047857458	NA	PRJNA523380	SAMN10989612	Human	9652523217	NCI-H2887	BROAD INSTITUTE	public	sra,bam	gs,s3,ncbi	s3.us-east-1,gs.US,ncbi.public	NA	NA	NA	SRX5414214	Illumina HiSeq 2500	cell line	RNASeq-NCIH2887_LUNG	PAIRED	cDNA	TRANSCRIPTOMIC	Homo sapiens	ILLUMINA	2019-03-27T00:00:00Z	NCIH2887_LUNG	cell culture	NA	SRP186687	lung
SRR8615540	48	RNA-Seq	GCA_000001405.13	202	19083502570	ATCC:NCI-H28	PRJNA523380	SAMN10987612	Human	10085115100	NCI-H28	BROAD INSTITUTE	public	bam,sra	ncbi,s3,gs	ncbi.public,gs.US,s3.us-east-1	mesothelioma	metastasis	African_american	SRX5414213	Illumina HiSeq 2500	cell line	RNASeq-NCIH28_PLEURA	PAIRED	cDNA	TRANSCRIPTOMIC	Homo sapiens	ILLUMINA	2019-03-27T00:00:00Z	NCIH28_PLEURA	cell culture	male	SRP186687	pleura
SRR8615541	NA	RNA-Seq	GCA_000001405.13	202	19907946784	ATCC:NCI-H2452	PRJNA523380	SAMN10988138	Human	10608523017	NCI-H2452	BROAD INSTITUTE	public	bam,sra	gs,ncbi,s3	ncbi.public,s3.us-east-1,gs.US	mesothelioma	metastasis	Caucasian	SRX5414212	Illumina HiSeq 2500	cell line	RNASeq-NCIH2452_PLEURA	PAIRED	cDNA	TRANSCRIPTOMIC	Homo sapiens	ILLUMINA	2019-03-27T00:00:00Z	NCIH2452_PLEURA	cell culture	male	SRP186687	pleura
SRR8615542	NA	RNA-Seq	GCA_000001405.13	202	19241478286	NA	PRJNA523380	SAMN10989611	Human	10271080957	NCIH2882	BROAD INSTITUTE	public	bam,sra	s3,ncbi,gs	gs.US,ncbi.public,s3.us-east-1	NA	NA	NA	SRX5414211	Illumina HiSeq 2500	cell line	RNASeq-NCIH2882_LUNG	PAIRED	cDNA	TRANSCRIPTOMIC	Homo sapiens	ILLUMINA	2019-03-27T00:00:00Z	NCIH2882_LUNG	cell culture	NA	SRP186687	lung
SRR8615543	NA	RNA-Seq	GCA_000001405.13	202	18344260340	NA	PRJNA523380	SAMN10989618	Human	9776570260	OPM-1	BROAD INSTITUTE	public	bam,sra	s3,gs,ncbi	gs.US,ncbi.public,s3.us-east-1	NA	NA	NA	SRX5414532	Illumina HiSeq 2500	cell line	RNASeq-OPM1_HAEMATOPOIETIC_AND_LYMPHOID_TISSUE	PAIRED	cDNA	TRANSCRIPTOMIC	Homo sapiens	ILLUMINA	2019-03-27T00:00:00Z	OPM1_HAEMATOPOIETIC_AND_LYMPHOID_TISSUE	cell culture	NA	SRP186687	haematopoietic_and_lymphoid_tissue
SRR8615544	NA	RNA-Seq	GCA_000001405.13	202	18440864416	NA	PRJNA523380	SAMN10988393	Human	9920727572	LN-428	BROAD INSTITUTE	public	sra,bam	ncbi,s3,gs	ncbi.public,s3.us-east-1,gs.US	glioma (astrocytoma_Grade_IV)	NA	Caucasian	SRX5414856	Illumina HiSeq 2500	cell line	RNASeq-LN428_CENTRAL_NERVOUS_SYSTEM	PAIRED	cDNA	TRANSCRIPTOMIC	Homo sapiens	ILLUMINA	2019-03-27T00:00:00Z	LN428_CENTRAL_NERVOUS_SYSTEM	cell culture	male	SRP186687	central_nervous_system
SRR8615546	NA	RNA-Seq	GCA_000001405.13	202	18928001960	NA	PRJNA523380	SAMN10988403	Human	10110792438	LN-464	BROAD INSTITUTE	public	bam,sra	gs,ncbi,s3	ncbi.public,gs.US,s3.us-east-1	glioma (astrocytoma_Grade_IV)	NA	Caucasian	SRX5414854	Illumina HiSeq 2500	cell line	RNASeq-LN464_CENTRAL_NERVOUS_SYSTEM	PAIRED	cDNA	TRANSCRIPTOMIC	Homo sapiens	ILLUMINA	2019-03-27T00:00:00Z	LN464_CENTRAL_NERVOUS_SYSTEM	cell culture	male	SRP186687	central_nervous_system
SRR8615547	50	RNA-Seq	GCA_000001405.13	202	14732501552	NIBRI	PRJNA523380	SAMN10988285	Human	6973140356	LNCaP clone FGC	BROAD INSTITUTE	public	bam,sra	gs,ncbi,s3	s3.us-east-1,gs.US,ncbi.public	carcinoma (adenocarcinoma)	metastasis	Caucasian	SRX5414853	Illumina HiSeq 2500	cell line	RNASeq-LNCAPCLONEFGC_PROSTATE	PAIRED	cDNA	TRANSCRIPTOMIC	Homo sapiens	ILLUMINA	2019-03-27T00:00:00Z	LNCAPCLONEFGC_PROSTATE	cell culture	male	SRP186687	prostate
SRR8615549	38	RNA-Seq	GCA_000001405.13	202	12771466766	NIBRI	PRJNA523380	SAMN10988140	Human	6006690002	Loucy	BROAD INSTITUTE	public	bam,sra	gs,s3,ncbi	gs.US,ncbi.public,s3.us-east-1	lymphoid_neoplasm (acute_lymphoblastic_T_cell_leukaemia)	primary	Caucasian	SRX5414851	Illumina HiSeq 2500	cell line	RNASeq-LOUCY_HAEMATOPOIETIC_AND_LYMPHOID_TISSUE	PAIRED	cDNA	TRANSCRIPTOMIC	Homo sapiens	ILLUMINA	2019-03-27T00:00:00Z	LOUCY_HAEMATOPOIETIC_AND_LYMPHOID_TISSUE	cell culture	female	SRP186687	haematopoietic_and_lymphoid_tissue
SRR8615550	64	RNA-Seq	GCA_000001405.13	202	13948253722	DSMZ:LOU-NH91	PRJNA523380	SAMN10988231	Human	6563311736	LOU-NH91	BROAD INSTITUTE	public	sra,bam	s3,ncbi,gs	s3.us-east-1,ncbi.public,gs.US	carcinoma (squamous_cell_carcinoma)	primary	Caucasian	SRX5414850	Illumina HiSeq 2500	cell line	RNASeq-LOUNH91_LUNG	PAIRED	cDNA	TRANSCRIPTOMIC	Homo sapiens	ILLUMINA	2019-03-27T00:00:00Z	LOUNH91_LUNG	cell culture	female	SRP186687	lung
SRR8615551	58	RNA-Seq	GCA_000001405.13	202	14751112014	GNF	PRJNA523380	SAMN10989576	Human	6977541212	JHUEM-7	BROAD INSTITUTE	public	sra,bam	s3,ncbi,gs	gs.US,ncbi.public,s3.us-east-1	carcinoma (adenocarcinoma)	primary	Asian	SRX5414849	Illumina HiSeq 2500	cell line	RNASeq-JHUEM7_ENDOMETRIUM	PAIRED	cDNA	TRANSCRIPTOMIC	Homo sapiens	ILLUMINA	2019-03-27T00:00:00Z	JHUEM7_ENDOMETRIUM	cell culture	female	SRP186687	endometrium
SRR8615552	NA	RNA-Seq	GCA_000001405.13	202	15468979412	RIKEN:JHUEM-3	PRJNA523380	SAMN10987748	Human	7276226737	JHUEM-3	BROAD INSTITUTE	public	bam,sra	ncbi,s3,gs	s3.us-east-1,gs.US,ncbi.public	carcinoma (adenocarcinoma)	primary	Asian	SRX5414848	Illumina HiSeq 2500	cell line	RNASeq-JHUEM3_ENDOMETRIUM	PAIRED	cDNA	TRANSCRIPTOMIC	Homo sapiens	ILLUMINA	2019-03-27T00:00:00Z	JHUEM3_ENDOMETRIUM	cell culture	NA	SRP186687	endometrium
SRR8615554	56	RNA-Seq	GCA_000001405.13	202	46960789916	RIKEN:JHUEM-1	PRJNA523380	SAMN10987934	Human	23511668068	JHUEM-1	BROAD INSTITUTE	public	bam,sra	s3,gs,ncbi	s3.us-east-1,gs.US,ncbi.public	carcinoma (adenocarcinoma)	primary	Asian	SRX5414846	Illumina HiSeq 2500	cell line	RNASeq-JHUEM1_ENDOMETRIUM	PAIRED	cDNA	TRANSCRIPTOMIC	Homo sapiens	ILLUMINA	2019-03-27T00:00:00Z	JHUEM1_ENDOMETRIUM	cell culture	female	SRP186687	endometrium
SRR8615557	57	RNA-Seq	GCA_000001405.13	202	16268112218	DSMZ:JJN-3	PRJNA523380	SAMN10988455	Human	8698626892	JJN-3	BROAD INSTITUTE	public	sra,bam	s3,ncbi,gs	s3.us-east-1,ncbi.public,gs.US	lymphoid_neoplasm (plasma_cell_myeloma)	primary	Caucasian	SRX5414843	Illumina HiSeq 2500	cell line	RNASeq-JJN3_HAEMATOPOIETIC_AND_LYMPHOID_TISSUE	PAIRED	cDNA	TRANSCRIPTOMIC	Homo sapiens	ILLUMINA	2019-03-27T00:00:00Z	JJN3_HAEMATOPOIETIC_AND_LYMPHOID_TISSUE	cell culture	female	SRP186687	haematopoietic_and_lymphoid_tissue
SRR8615558	62	RNA-Seq	GCA_000001405.13	202	14689020850	DSMZ:JIMT-1	PRJNA523380	SAMN10989571	Human	6934602563	JIMT-1	BROAD INSTITUTE	public	sra,bam	s3,gs,ncbi	gs.US,s3.us-east-1,ncbi.public	carcinoma (ductal_carcinoma)	metastasis	Caucasian	SRX5414842	Illumina HiSeq 2500	cell line	RNASeq-JIMT1_BREAST	PAIRED	cDNA	TRANSCRIPTOMIC	Homo sapiens	ILLUMINA	2019-03-27T00:00:00Z	JIMT1_BREAST	cell culture	female	SRP186687	breast
SRR8615559	75	RNA-Seq	GCA_000001405.13	202	16915157002	DSMZ:JMSU-1	PRJNA523380	SAMN10988102	Human	7952578817	JMSU-1	BROAD INSTITUTE	public	sra,bam	s3,gs,ncbi	s3.us-east-1,gs.US,ncbi.public	carcinoma	primary	Asian	SRX5414841	Illumina HiSeq 2500	cell line	RNASeq-JMSU1_URINARY_TRACT	PAIRED	cDNA	TRANSCRIPTOMIC	Homo sapiens	ILLUMINA	2019-03-27T00:00:00Z	JMSU1_URINARY_TRACT	cell culture	male	SRP186687	urinary_tract
SRR8615560	NA	RNA-Seq	GCA_000001405.13	202	26125451638	NIBRI	PRJNA523380	SAMN10987951	Human	13022800022	JM1	BROAD INSTITUTE	public	sra,bam	s3,ncbi,gs	s3.us-east-1,gs.US,ncbi.public	lymphoid_neoplasm (B_cell_lymphoma_unspecified)	primary	Caucasian	SRX5414840	Illumina HiSeq 2500	cell line	RNASeq-JM1_HAEMATOPOIETIC_AND_LYMPHOID_TISSUE	PAIRED	cDNA	TRANSCRIPTOMIC	Homo sapiens	ILLUMINA	2019-03-27T00:00:00Z	JM1_HAEMATOPOIETIC_AND_LYMPHOID_TISSUE	cell culture	NA	SRP186687	haematopoietic_and_lymphoid_tissue
SRR8615562	84	RNA-Seq	GCA_000001405.13	202	14839715072	DSMZ:SW-1710	PRJNA523380	SAMN10988432	Human	7261729670	SW-1710	BROAD INSTITUTE	public	bam,sra	ncbi,s3,gs	ncbi.public,s3.us-east-1,gs.US	carcinoma (transitional_cell_carcinoma)	primary	Caucasian	SRX5414838	Illumina HiSeq 2500	cell line	RNASeq-SW1710_URINARY_TRACT	PAIRED	cDNA	TRANSCRIPTOMIC	Homo sapiens	ILLUMINA	2019-03-27T00:00:00Z	SW1710_URINARY_TRACT	cell culture	female	SRP186687	urinary_tract
SRR8615563	53	RNA-Seq	GCA_000001405.13	202	12611978070	NIBRI	PRJNA523380	SAMN10988333	Human	6349439821	SW1417	BROAD INSTITUTE	public	bam,sra	s3,gs,ncbi	ncbi.public,s3.us-east-1,gs.US	carcinoma (adenocarcinoma)	primary	Caucasian	SRX5414837	Illumina HiSeq 2500	cell line	RNASeq-SW1417_LARGE_INTESTINE	PAIRED	cDNA	TRANSCRIPTOMIC	Homo sapiens	ILLUMINA	2019-03-27T00:00:00Z	SW1417_LARGE_INTESTINE	cell culture	female	SRP186687	large_intestine
SRR8615565	NA	RNA-Seq	GCA_000001405.13	202	20827350794	KCLB:SNU-1196	PRJNA523380	SAMN10988072	Human	11273107410	SNU-1196	BROAD INSTITUTE	public	bam,sra	gs,ncbi,s3	gs.US,ncbi.public,s3.us-east-1	carcinoma	primary	Asian	SRX5414835	Illumina HiSeq 2500	cell line	RNASeq-SNU1196_BILIARY_TRACT	PAIRED	cDNA	TRANSCRIPTOMIC	Homo sapiens	ILLUMINA	2019-03-27T00:00:00Z	SNU1196_BILIARY_TRACT	cell culture	NA	SRP186687	biliary_tract
SRR8615566	61	RNA-Seq	GCA_000001405.13	202	15645038976	NA	PRJNA523380	SAMN10988078	Human	7840232805	SNU-1105	BROAD INSTITUTE	public	sra,bam	s3,gs,ncbi	s3.us-east-1,gs.US,ncbi.public	glioma (astrocytoma_Grade_IV\, glioblastoma_multiforme)	primary	Asian	SRX5414834	Illumina HiSeq 2500	cell line	RNASeq-SNU1105_CENTRAL_NERVOUS_SYSTEM	PAIRED	cDNA	TRANSCRIPTOMIC	Homo sapiens	ILLUMINA	2019-03-27T00:00:00Z	SNU1105_CENTRAL_NERVOUS_SYSTEM	cell culture	male	SRP186687	central_nervous_system
SRR8615567	68	RNA-Seq	GCA_000001405.13	202	16295515336	NIBRI	PRJNA523380	SAMN10987670	Human	8185173588	SW 1783	BROAD INSTITUTE	public	sra,bam	ncbi,s3,gs	ncbi.public,gs.US,s3.us-east-1	glioma (astrocytoma_Grade_III\, anaplastic)	primary	Caucasian	SRX5414833	Illumina HiSeq 2500	cell line	RNASeq-SW1783_CENTRAL_NERVOUS_SYSTEM	PAIRED	cDNA	TRANSCRIPTOMIC	Homo sapiens	ILLUMINA	2019-03-27T00:00:00Z	SW1783_CENTRAL_NERVOUS_SYSTEM	cell culture	male	SRP186687	central_nervous_system
SRR8615569	70	RNA-Seq	GCA_000001405.13	202	18498664494	DSMZ:CAL-62	PRJNA523380	SAMN10988563	Human	9249594132	CAL-62	BROAD INSTITUTE	public	bam,sra	s3,ncbi,gs	s3.us-east-1,gs.US,ncbi.public	carcinoma (anaplastic_carcinoma)	primary	Caucasian	SRX5414831	Illumina HiSeq 2500	cell line	RNASeq-CAL62_THYROID	PAIRED	cDNA	TRANSCRIPTOMIC	Homo sapiens	ILLUMINA	2019-03-27T00:00:00Z	CAL62_THYROID	cell culture	female	SRP186687	thyroid
SRR8615571	NA	RNA-Seq	GCA_000001405.13	202	21100015242	NA	PRJNA523380	SAMN10988073	Human	11379066565	SNU-1079	BROAD INSTITUTE	public	sra,bam	ncbi,s3,gs	s3.us-east-1,gs.US,ncbi.public	carcinoma	primary	Asian	SRX5414829	Illumina HiSeq 2500	cell line	RNASeq-SNU1079_BILIARY_TRACT	PAIRED	cDNA	TRANSCRIPTOMIC	Homo sapiens	ILLUMINA	2019-03-27T00:00:00Z	SNU1079_BILIARY_TRACT	cell culture	NA	SRP186687	biliary_tract
SRR8615572	60	RNA-Seq	GCA_000001405.13	202	23803749286	KCLB:SNU-1077	PRJNA523380	SAMN10987741	Human	12767349205	SNU-1077	BROAD INSTITUTE	public	bam,sra	ncbi,s3,gs	gs.US,s3.us-east-1,ncbi.public	carcinoma (carcinosarcoma-malignant_mesodermal_mixed_tumour)	primary	Asian	SRX5414828	Illumina HiSeq 2500	cell line	RNASeq-SNU1077_ENDOMETRIUM	PAIRED	cDNA	TRANSCRIPTOMIC	Homo sapiens	ILLUMINA	2019-03-27T00:00:00Z	SNU1077_ENDOMETRIUM	cell culture	female	SRP186687	endometrium
SRR8615573	45	RNA-Seq	GCA_000001405.13	202	20784556084	KCLB:SNU-1033	PRJNA523380	SAMN10987752	Human	11248574983	SNU-1033	BROAD INSTITUTE	public	sra,bam	gs,s3,ncbi	gs.US,s3.us-east-1,ncbi.public	carcinoma	primary	Asian	SRX5414827	Illumina HiSeq 2500	cell line	RNASeq-SNU1033_LARGE_INTESTINE	PAIRED	cDNA	TRANSCRIPTOMIC	Homo sapiens	ILLUMINA	2019-03-27T00:00:00Z	SNU1033_LARGE_INTESTINE	cell culture	female	SRP186687	large_intestine
SRR8615574	52	RNA-Seq	GCA_000001405.13	202	15416451332	HSSRB	PRJNA523380	SAMN10987627	Human	7755617007	SNG-M	BROAD INSTITUTE	public	bam,sra	s3,gs,ncbi	gs.US,s3.us-east-1,ncbi.public	carcinoma (adenocarcinoma)	metastasis	Asian	SRX5414826	Illumina HiSeq 2500	cell line	RNASeq-SNGM_ENDOMETRIUM	PAIRED	cDNA	TRANSCRIPTOMIC	Homo sapiens	ILLUMINA	2019-03-27T00:00:00Z	SNGM_ENDOMETRIUM	cell culture	female	SRP186687	endometrium
SRR8615575	NA	RNA-Seq	GCA_000001405.13	202	20832394936	KCLB:SNU-1041	PRJNA523380	SAMN10987966	Human	11227995995	SNU-1041	BROAD INSTITUTE	public	sra,bam	s3,ncbi,gs	gs.US,s3.us-east-1,ncbi.public	carcinoma	primary	Asian	SRX5414825	Illumina HiSeq 2500	cell line	RNASeq-SNU1041_UPPER_AERODIGESTIVE_TRACT	PAIRED	cDNA	TRANSCRIPTOMIC	Homo sapiens	ILLUMINA	2019-03-27T00:00:00Z	SNU1041_UPPER_AERODIGESTIVE_TRACT	cell culture	NA	SRP186687	upper_aerodigestive_tract
SRR8615576	34	RNA-Seq	GCA_000001405.13	202	22294024718	KCLB:SNU-1040	PRJNA523380	SAMN10988065	Human	12013720222	SNU-1040	BROAD INSTITUTE	public	sra,bam	s3,ncbi,gs	ncbi.public,s3.us-east-1,gs.US	carcinoma	primary	Asian	SRX5414824	Illumina HiSeq 2500	cell line	RNASeq-SNU1040_LARGE_INTESTINE	PAIRED	cDNA	TRANSCRIPTOMIC	Homo sapiens	ILLUMINA	2019-03-27T00:00:00Z	SNU1040_LARGE_INTESTINE	cell culture	male	SRP186687	large_intestine
SRR8615577	48	RNA-Seq	GCA_000001405.13	202	12781082976	NIBRI	PRJNA523380	SAMN10988263	Human	6427604087	MDA-MB-453	BROAD INSTITUTE	public	bam,sra	s3,ncbi,gs	ncbi.public,s3.us-east-1,gs.US	carcinoma	metastasis	Caucasian	SRX5414823	Illumina HiSeq 2500	cell line	RNASeq-MDAMB453_BREAST	PAIRED	cDNA	TRANSCRIPTOMIC	Homo sapiens	ILLUMINA	2019-03-27T00:00:00Z	MDAMB453_BREAST	cell culture	female	SRP186687	breast
SRR8615579	63	RNA-Seq	GCA_000001405.13	202	13864872566	ATCC:MDA PCa 2b	PRJNA523380	SAMN10988222	Human	6529607978	MDA PCa 2b	BROAD INSTITUTE	public	sra,bam	ncbi,gs,s3	s3.us-east-1,ncbi.public,gs.US	carcinoma (adenocarcinoma)	metastasis	African_american	SRX5414821	Illumina HiSeq 2500	cell line	RNASeq-MDAPCA2B_PROSTATE	PAIRED	cDNA	TRANSCRIPTOMIC	Homo sapiens	ILLUMINA	2019-03-27T00:00:00Z	MDAPCA2B_PROSTATE	cell culture	male	SRP186687	prostate
SRR8615580	NA	RNA-Seq	GCA_000001405.13	202	14294924102	ECACC:MDST8	PRJNA523380	SAMN10988016	Human	6785961154	MDST8	BROAD INSTITUTE	public	sra,bam	ncbi,gs,s3	gs.US,ncbi.public,s3.us-east-1	carcinoma (adenocarcinoma)	primary	Caucasian	SRX5414820	Illumina HiSeq 2500	cell line	RNASeq-MDST8_LARGE_INTESTINE	PAIRED	cDNA	TRANSCRIPTOMIC	Homo sapiens	ILLUMINA	2019-03-27T00:00:00Z	MDST8_LARGE_INTESTINE	cell culture	NA	SRP186687	large_intestine
SRR8615582	38	RNA-Seq	GCA_000001405.13	202	15148447226	ATCC:MDA-MB-415	PRJNA523380	SAMN10988336	Human	7140286865	MDA-MB-415	BROAD INSTITUTE	public	sra,bam	gs,s3,ncbi	s3.us-east-1,ncbi.public,gs.US	carcinoma	metastasis	Caucasian	SRX5414818	Illumina HiSeq 2500	cell line	RNASeq-MDAMB415_BREAST	PAIRED	cDNA	TRANSCRIPTOMIC	Homo sapiens	ILLUMINA	2019-03-27T00:00:00Z	MDAMB415_BREAST	cell culture	female	SRP186687	breast
SRR8615584	43	RNA-Seq	GCA_000001405.13	202	15016877960	ATCC:MDA-MB-436	PRJNA523380	SAMN10987901	Human	7032768774	MDA-MB-436	BROAD INSTITUTE	public	sra,bam	gs,s3,ncbi	s3.us-east-1,ncbi.public,gs.US	carcinoma	metastasis	Caucasian	SRX5414816	Illumina HiSeq 2500	cell line	RNASeq-MDAMB436_BREAST	PAIRED	cDNA	TRANSCRIPTOMIC	Homo sapiens	ILLUMINA	2019-03-27T00:00:00Z	MDAMB436_BREAST	cell culture	female	SRP186687	breast
SRR8615585	40	RNA-Seq	GCA_000001405.13	202	13659577744	DSMZ:ME-1	PRJNA523380	SAMN10988452	Human	6445878410	ME-1	BROAD INSTITUTE	public	bam,sra	gs,ncbi,s3	s3.us-east-1,ncbi.public,gs.US	haematopoietic_neoplasm (acute_myeloid_leukaemia\, M4)	primary	Asian	SRX5414815	Illumina HiSeq 2500	cell line	RNASeq-ME1_HAEMATOPOIETIC_AND_LYMPHOID_TISSUE	PAIRED	cDNA	TRANSCRIPTOMIC	Homo sapiens	ILLUMINA	2019-03-27T00:00:00Z	ME1_HAEMATOPOIETIC_AND_LYMPHOID_TISSUE	cell culture	male	SRP186687	haematopoietic_and_lymphoid_tissue
SRR8615586	61	RNA-Seq	GCA_000001405.13	202	17086055062	DSMZ:MEC-1	PRJNA523380	SAMN10989555	Human	8551772489	MEC-1	BROAD INSTITUTE	public	sra,bam	ncbi,gs,s3	gs.US,ncbi.public,s3.us-east-1	lymphoid_neoplasm (chronic_lymphocytic_leukaemia-small_lymphocytic_lymphoma)	primary	Caucasian	SRX5414814	Illumina HiSeq 2500	cell line	RNASeq-MEC1_HAEMATOPOIETIC_AND_LYMPHOID_TISSUE	PAIRED	cDNA	TRANSCRIPTOMIC	Homo sapiens	ILLUMINA	2019-03-27T00:00:00Z	MEC1_HAEMATOPOIETIC_AND_LYMPHOID_TISSUE	cell culture	male	SRP186687	haematopoietic_and_lymphoid_tissue
SRR8615587	47	RNA-Seq	GCA_000001405.13	202	20309370476	DSMZ:S-117	PRJNA523380	SAMN10988560	Human	11324309482	S-117	BROAD INSTITUTE	public	sra,bam	s3,gs,ncbi	gs.US,ncbi.public,s3.us-east-1	sarcoma	primary	Caucasian	SRX5414813	Illumina HiSeq 2500	cell line	RNASeq-S117_THYROID	PAIRED	cDNA	TRANSCRIPTOMIC	Homo sapiens	ILLUMINA	2019-03-27T00:00:00Z	S117_THYROID	cell culture	female	SRP186687	soft_tissue
SRR8615588	NA	RNA-Seq	GCA_000001405.13	202	19681913632	HSSRB	PRJNA523380	SAMN10987854	Human	9676135148	HEC-50B	BROAD INSTITUTE	public	bam,sra	gs,ncbi,s3	s3.us-east-1,ncbi.public,gs.US	carcinoma (adenocarcinoma)	primary	Asian	SRX5414812	Illumina HiSeq 2500	cell line	RNASeq-HEC50B_ENDOMETRIUM	PAIRED	cDNA	TRANSCRIPTOMIC	Homo sapiens	ILLUMINA	2019-03-27T00:00:00Z	HEC50B_ENDOMETRIUM	cell culture	female	SRP186687	endometrium
SRR8615589	35	RNA-Seq	GCA_000001405.13	202	15310207008	ATCC:NCI-H1435	PRJNA523380	SAMN10988518	Human	7673807337	NCI-H1435	BROAD INSTITUTE	public	bam,sra	gs,ncbi,s3	s3.us-east-1,ncbi.public,gs.US	carcinoma (non_small_cell_carcinoma)	primary	Caucasian	SRX5414811	Illumina HiSeq 2500	cell line	RNASeq-NCIH1435_LUNG	PAIRED	cDNA	TRANSCRIPTOMIC	Homo sapiens	ILLUMINA	2019-03-27T00:00:00Z	NCIH1435_LUNG	cell culture	female	SRP186687	lung
SRR8615590	78	RNA-Seq	GCA_000001405.13	202	23327131498	HSSRB	PRJNA523380	SAMN10988172	Human	12516576514	RERF-LC-KJ	BROAD INSTITUTE	public	bam,sra	s3,gs,ncbi	s3.us-east-1,gs.US,ncbi.public	carcinoma (non_small_cell_carcinoma)	primary	Asian	SRX5414810	Illumina HiSeq 2500	cell line	RNASeq-RERFLCKJ_LUNG	PAIRED	cDNA	TRANSCRIPTOMIC	Homo sapiens	ILLUMINA	2019-03-27T00:00:00Z	RERFLCKJ_LUNG	cell culture	male	SRP186687	lung
SRR8615591	NA	RNA-Seq	GCA_000001405.13	202	19542922280	RIKEN:RERF-LC-AI	PRJNA523380	SAMN10987780	Human	10501702750	RERF-LC-AI	BROAD INSTITUTE	public	bam,sra	ncbi,s3,gs	s3.us-east-1,gs.US,ncbi.public	carcinoma (squamous_cell_carcinoma)	primary	Asian	SRX5414809	Illumina HiSeq 2500	cell line	RNASeq-RERFLCAI_LUNG	PAIRED	cDNA	TRANSCRIPTOMIC	Homo sapiens	ILLUMINA	2019-03-27T00:00:00Z	RERFLCAI_LUNG	cell culture	NA	SRP186687	lung
SRR8615593	73	RNA-Seq	GCA_000001405.13	202	20523909424	HSSRB	PRJNA523380	SAMN10988165	Human	11065778891	RCM-1	BROAD INSTITUTE	public	bam,sra	s3,ncbi,gs	s3.us-east-1,gs.US,ncbi.public	carcinoma (adenocarcinoma)	primary	Asian	SRX5414807	Illumina HiSeq 2500	cell line	RNASeq-RCM1_LARGE_INTESTINE	PAIRED	cDNA	TRANSCRIPTOMIC	Homo sapiens	ILLUMINA	2019-03-27T00:00:00Z	RCM1_LARGE_INTESTINE	cell culture	female	SRP186687	large_intestine
SRR8615594	61	RNA-Seq	GCA_000001405.13	202	22336689946	DSMZ:REC-1	PRJNA523380	SAMN10989553	Human	11989474680	REC-1	BROAD INSTITUTE	public	bam,sra	s3,gs,ncbi	s3.us-east-1,ncbi.public,gs.US	lymphoid_neoplasm (mantle_cell_lymphoma)	primary	Caucasian	SRX5414806	Illumina HiSeq 2500	cell line	RNASeq-REC1_HAEMATOPOIETIC_AND_LYMPHOID_TISSUE	PAIRED	cDNA	TRANSCRIPTOMIC	Homo sapiens	ILLUMINA	2019-03-27T00:00:00Z	REC1_HAEMATOPOIETIC_AND_LYMPHOID_TISSUE	cell culture	male	SRP186687	haematopoietic_and_lymphoid_tissue
SRR8615596	41	RNA-Seq	GCA_000001405.13	202	18060533968	NIBRI	PRJNA523380	SAMN10987634	Human	9090996957	RERF-GC-1B	BROAD INSTITUTE	public	sra,bam	s3,ncbi,gs	ncbi.public,s3.us-east-1,gs.US	carcinoma	metastasis	Asian	SRX5414804	Illumina HiSeq 2500	cell line	RNASeq-RERFGC1B_STOMACH	PAIRED	cDNA	TRANSCRIPTOMIC	Homo sapiens	ILLUMINA	2019-03-27T00:00:00Z	RERFGC1B_STOMACH	cell culture	male	SRP186687	stomach
SRR8615597	15	RNA-Seq	GCA_000001405.13	202	15265217972	ATCC:Reh	PRJNA523380	SAMN10988185	Human	7653377551	Reh	BROAD INSTITUTE	public	bam,sra	gs,s3,ncbi	ncbi.public,s3.us-east-1,gs.US	lymphoid_neoplasm (acute_lymphoblastic_B_cell_leukaemia)	primary	Caucasian	SRX5414803	Illumina HiSeq 2500	cell line	RNASeq-REH_HAEMATOPOIETIC_AND_LYMPHOID_TISSUE	PAIRED	cDNA	TRANSCRIPTOMIC	Homo sapiens	ILLUMINA	2019-03-27T00:00:00Z	REH_HAEMATOPOIETIC_AND_LYMPHOID_TISSUE	cell culture	female	SRP186687	haematopoietic_and_lymphoid_tissue
SRR8615598	NA	RNA-Seq	GCA_000001405.13	202	19682229156	HSSRB	PRJNA523380	SAMN10987625	Human	10600956535	RERF-LC-Ad2	BROAD INSTITUTE	public	bam,sra	gs,s3,ncbi	s3.us-east-1,ncbi.public,gs.US	carcinoma (adenocarcinoma)	primary	Asian	SRX5414802	Illumina HiSeq 2500	cell line	RNASeq-RERFLCAD2_LUNG	PAIRED	cDNA	TRANSCRIPTOMIC	Homo sapiens	ILLUMINA	2019-03-27T00:00:00Z	RERFLCAD2_LUNG	cell culture	male	SRP186687	lung
SRR8615599	70	RNA-Seq	GCA_000001405.13	202	23427422478	HSRRB	PRJNA523380	SAMN10988297	Human	12592392768	RERF-LC-Ad1	BROAD INSTITUTE	public	bam,sra	s3,gs,ncbi	gs.US,s3.us-east-1,ncbi.public	carcinoma (adenocarcinoma)	primary	Asian	SRX5414801	Illumina HiSeq 2500	cell line	RNASeq-RERFLCAD1_LUNG	PAIRED	cDNA	TRANSCRIPTOMIC	Homo sapiens	ILLUMINA	2019-03-27T00:00:00Z	RERFLCAD1_LUNG	cell culture	male	SRP186687	lung
SRR8615600	36	RNA-Seq	GCA_000001405.13	202	20229248590	ATCC:NCI-H1155	PRJNA523380	SAMN10988300	Human	10643197161	NCI-H1155	BROAD INSTITUTE	public	sra,bam	ncbi,gs,s3	s3.us-east-1,gs.US,ncbi.public	carcinoma (large_cell_carcinoma)	metastasis	Caucasian	SRX5414800	Illumina HiSeq 2500	cell line	RNASeq-NCIH1155_LUNG	PAIRED	cDNA	TRANSCRIPTOMIC	Homo sapiens	ILLUMINA	2019-03-27T00:00:00Z	NCIH1155_LUNG	cell culture	male	SRP186687	lung
SRR8615601	59	RNA-Seq	GCA_000001405.13	202	19906974558	NIBRI	PRJNA523380	SAMN10987993	Human	9865108683	NCI-H2081	BROAD INSTITUTE	public	sra,bam	ncbi,gs,s3	s3.us-east-1,gs.US,ncbi.public	carcinoma (small_cell_carcinoma)	metastasis	Caucasian	SRX5414799	Illumina HiSeq 2500	cell line	RNASeq-NCIH2081_LUNG	PAIRED	cDNA	TRANSCRIPTOMIC	Homo sapiens	ILLUMINA	2019-03-27T00:00:00Z	NCIH2081_LUNG	cell culture	female	SRP186687	lung
SRR8615602	56	RNA-Seq	GCA_000001405.13	202	16194675724	ATCC:NCI-H1963	PRJNA523380	SAMN10987786	Human	8015023694	NCI-H1963	BROAD INSTITUTE	public	bam,sra	gs,ncbi,s3	s3.us-east-1,gs.US,ncbi.public	carcinoma (small_cell_carcinoma)	primary	African_american	SRX5414798	Illumina HiSeq 2500	cell line	RNASeq-NCIH1963_LUNG	PAIRED	cDNA	TRANSCRIPTOMIC	Homo sapiens	ILLUMINA	2019-03-27T00:00:00Z	NCIH1963_LUNG	cell culture	male	SRP186687	lung
SRR8615604	55	RNA-Seq	GCA_000001405.13	202	19552552832	NA	PRJNA523380	SAMN10988204	Human	9683772450	NCI-H209	BROAD INSTITUTE	public	sra,bam	gs,s3,ncbi	ncbi.public,gs.US,s3.us-east-1	carcinoma (small_cell_carcinoma)	metastasis	Caucasian	SRX5414796	Illumina HiSeq 2500	cell line	RNASeq-NCIH209_LUNG	PAIRED	cDNA	TRANSCRIPTOMIC	Homo sapiens	ILLUMINA	2019-03-27T00:00:00Z	NCIH209_LUNG	cell culture	male	SRP186687	lung
SRR8615606	NA	RNA-Seq	GCA_000001405.13	202	22546632990	GNF	PRJNA523380	SAMN10987977	Human	11953723258	NCI-H2110	BROAD INSTITUTE	public	sra,bam	s3,gs,ncbi	ncbi.public,gs.US,s3.us-east-1	carcinoma (non_small_cell_carcinoma)	metastasis	African_american	SRX5414794	Illumina HiSeq 2500	cell line	RNASeq-NCIH2110_LUNG	PAIRED	cDNA	TRANSCRIPTOMIC	Homo sapiens	ILLUMINA	2019-03-27T00:00:00Z	NCIH2110_LUNG	cell culture	NA	SRP186687	lung
SRR8615607	50	RNA-Seq	GCA_000001405.13	202	19838559380	ATCC:NCI-H211	PRJNA523380	SAMN10988220	Human	9785020978	NCI-H211	BROAD INSTITUTE	public	bam,sra	s3,gs,ncbi	ncbi.public,s3.us-east-1,gs.US	carcinoma (small_cell_carcinoma)	metastasis	Caucasian	SRX5414793	Illumina HiSeq 2500	cell line	RNASeq-NCIH211_LUNG	PAIRED	cDNA	TRANSCRIPTOMIC	Homo sapiens	ILLUMINA	2019-03-27T00:00:00Z	NCIH211_LUNG	cell culture	female	SRP186687	lung
SRR8615612	56	RNA-Seq	GCA_000001405.13	202	16856972720	ATCC:NCI-H1373	PRJNA523380	SAMN10988153	Human	7789448959	NCI-H1373	BROAD INSTITUTE	public	sra,bam	ncbi,s3,gs	gs.US,s3.us-east-1,ncbi.public	carcinoma (adenocarcinoma)	primary	African_american	SRX5414788	Illumina HiSeq 2500	cell line	RNASeq-NCIH1373_LUNG	PAIRED	cDNA	TRANSCRIPTOMIC	Homo sapiens	ILLUMINA	2019-03-27T00:00:00Z	NCIH1373_LUNG	cell culture	male	SRP186687	lung
SRR8615615	58	RNA-Seq	GCA_000001405.13	202	23055539064	ATCC:NCI-H1869	PRJNA523380	SAMN10988520	Human	12194394303	NCI-H1869	BROAD INSTITUTE	public	bam,sra	ncbi,s3,gs	ncbi.public,gs.US,s3.us-east-1	carcinoma (squamous_cell_carcinoma)	metastasis	Caucasian	SRX5414785	Illumina HiSeq 2500	cell line	RNASeq-NCIH1869_LUNG	PAIRED	cDNA	TRANSCRIPTOMIC	Homo sapiens	ILLUMINA	2019-03-27T00:00:00Z	NCIH1869_LUNG	cell culture	male	SRP186687	lung
SRR8615616	NA	RNA-Seq	GCA_000001405.13	202	18081435716	NA	PRJNA523380	SAMN10988439	Human	9569221922	NCI-H1385	BROAD INSTITUTE	public	bam,sra	gs,s3,ncbi	gs.US,s3.us-east-1,ncbi.public	carcinoma (squamous_cell_carcinoma)	metastasis	African_american	SRX5414784	Illumina HiSeq 2500	cell line	RNASeq-NCIH1385_LUNG	PAIRED	cDNA	TRANSCRIPTOMIC	Homo sapiens	ILLUMINA	2019-03-27T00:00:00Z	NCIH1385_LUNG	cell culture	NA	SRP186687	lung
SRR8615618	14	RNA-Seq	GCA_000001405.13	202	20443752592	ATCC:COLO-800	PRJNA523380	SAMN10987785	Human	11507623355	COLO-800	BROAD INSTITUTE	public	sra,bam	ncbi,gs,s3	ncbi.public,gs.US,s3.us-east-1	malignant_melanoma	primary	Caucasian	SRX5414782	Illumina HiSeq 2500	cell line	RNASeq-COLO800_SKIN	PAIRED	cDNA	TRANSCRIPTOMIC	Homo sapiens	ILLUMINA	2019-03-27T00:00:00Z	COLO800_SKIN	cell culture	male	SRP186687	skin
SRR8615619	35	RNA-Seq	GCA_000001405.13	202	17783442488	KCLB:SNU-C4	PRJNA523380	SAMN10987757	Human	8738512823	SNU-C4	BROAD INSTITUTE	public	sra,bam	ncbi,s3,gs	gs.US,s3.us-east-1,ncbi.public	carcinoma (adenocarcinoma)	primary	Asian	SRX5414781	Illumina HiSeq 2500	cell line	RNASeq-SNUC4_LARGE_INTESTINE	PAIRED	cDNA	TRANSCRIPTOMIC	Homo sapiens	ILLUMINA	2019-03-27T00:00:00Z	SNUC4_LARGE_INTESTINE	cell culture	male	SRP186687	large_intestine
SRR8615620	6	RNA-Seq	GCA_000001405.13	202	26699582098	GNF	PRJNA523380	SAMN10988169	Human	13318029334	TE 159.T	BROAD INSTITUTE	public	bam,sra	s3,ncbi,gs	s3.us-east-1,gs.US,ncbi.public	rhabdomyosarcoma	primary	Caucasian	SRX5414780	Illumina HiSeq 2500	cell line	RNASeq-TE159T_FIBROBLAST	PAIRED	cDNA	TRANSCRIPTOMIC	Homo sapiens	ILLUMINA	2019-03-27T00:00:00Z	TE159T_FIBROBLAST	cell culture	male	SRP186687	soft_tissue
SRR8615621	71	RNA-Seq	GCA_000001405.13	202	20288625076	NIBRI	PRJNA523380	SAMN10987737	Human	9980796671	HEC-1-B	BROAD INSTITUTE	public	sra,bam	ncbi,gs,s3	s3.us-east-1,ncbi.public,gs.US	carcinoma (adenocarcinoma)	primary	Asian	SRX5414779	Illumina HiSeq 2500	cell line	RNASeq-HEC1B_ENDOMETRIUM	PAIRED	cDNA	TRANSCRIPTOMIC	Homo sapiens	ILLUMINA	2019-03-27T00:00:00Z	HEC1B_ENDOMETRIUM	cell culture	female	SRP186687	endometrium
SRR8615625	NA	RNA-Seq	GCA_000001405.13	202	15988809040	HSSRB	PRJNA523380	SAMN10988108	Human	7885796463	HEC-59	BROAD INSTITUTE	public	sra,bam	s3,ncbi,gs	s3.us-east-1,ncbi.public,gs.US	carcinoma (adenocarcinoma)	primary	Asian	SRX5414775	Illumina HiSeq 2500	cell line	RNASeq-HEC59_ENDOMETRIUM	PAIRED	cDNA	TRANSCRIPTOMIC	Homo sapiens	ILLUMINA	2019-03-27T00:00:00Z	HEC59_ENDOMETRIUM	cell culture	female	SRP186687	endometrium
SRR8615627	NA	RNA-Seq	GCA_000001405.13	202	16634109958	NA	PRJNA523380	SAMN10988406	Human	8892423625	HEK TE	BROAD INSTITUTE	public	sra,bam	gs,ncbi,s3	s3.us-east-1,ncbi.public,gs.US	other (immortalized_epithelial)	NA	Caucasian	SRX5414773	Illumina HiSeq 2500	cell line	RNASeq-HEKTE_KIDNEY	PAIRED	cDNA	TRANSCRIPTOMIC	Homo sapiens	ILLUMINA	2019-03-27T00:00:00Z	HEKTE_KIDNEY	cell culture	NA	SRP186687	kidney
SRR8615628	30	RNA-Seq	GCA_000001405.13	202	18371746480	NIBRI	PRJNA523380	SAMN10987842	Human	9019009512	HEL 92.1.7	BROAD INSTITUTE	public	bam,sra	gs,ncbi,s3	ncbi.public,gs.US,s3.us-east-1	haematopoietic_neoplasm (acute_myeloid_leukaemia\, M6)	primary	Caucasian	SRX5414772	Illumina HiSeq 2500	cell line	RNASeq-HEL9217_HAEMATOPOIETIC_AND_LYMPHOID_TISSUE	PAIRED	cDNA	TRANSCRIPTOMIC	Homo sapiens	ILLUMINA	2019-03-27T00:00:00Z	HEL9217_HAEMATOPOIETIC_AND_LYMPHOID_TISSUE	cell culture	male	SRP186687	haematopoietic_and_lymphoid_tissue
SRR8615629	NA	RNA-Seq	GCA_000001405.13	202	18114302732	NA	PRJNA523380	SAMN10989629	Human	9681909554	HELA	BROAD INSTITUTE	public	sra,bam	ncbi,s3,gs	ncbi.public,gs.US,s3.us-east-1	NA	NA	NA	SRX5414771	Illumina HiSeq 2500	cell line	RNASeq-HELA_CERVIX	PAIRED	cDNA	TRANSCRIPTOMIC	Homo sapiens	ILLUMINA	2019-03-27T00:00:00Z	HELA_CERVIX	cell culture	NA	SRP186687	cervix
SRR8615630	30	RNA-Seq	GCA_000001405.13	202	17378620752	DSMZ:HEL	PRJNA523380	SAMN10987697	Human	8513698198	HEL	BROAD INSTITUTE	public	bam,sra	ncbi,gs,s3	gs.US,s3.us-east-1,ncbi.public	haematopoietic_neoplasm (acute_myeloid_leukaemia\, M6)	primary	Caucasian	SRX5414770	Illumina HiSeq 2500	cell line	RNASeq-HEL_HAEMATOPOIETIC_AND_LYMPHOID_TISSUE	PAIRED	cDNA	TRANSCRIPTOMIC	Homo sapiens	ILLUMINA	2019-03-27T00:00:00Z	HEL_HAEMATOPOIETIC_AND_LYMPHOID_TISSUE	cell culture	male	SRP186687	haematopoietic_and_lymphoid_tissue
SRR8615631	60	RNA-Seq	GCA_000001405.13	202	23632550448	DSMZ:DOHH-2	PRJNA523380	SAMN10988489	Human	13307933108	DOHH-2	BROAD INSTITUTE	public	sra,bam	gs,ncbi,s3	gs.US,s3.us-east-1,ncbi.public	lymphoid_neoplasm (diffuse_large_B_cell_lymphoma)	metastasis	Caucasian	SRX5414769	Illumina HiSeq 2500	cell line	RNASeq-DOHH2_HAEMATOPOIETIC_AND_LYMPHOID_TISSUE	PAIRED	cDNA	TRANSCRIPTOMIC	Homo sapiens	ILLUMINA	2019-03-27T00:00:00Z	DOHH2_HAEMATOPOIETIC_AND_LYMPHOID_TISSUE	cell culture	male	SRP186687	haematopoietic_and_lymphoid_tissue
SRR8615633	NA	RNA-Seq	GCA_000001405.13	202	19988692042	RIKEN:ECC10	PRJNA523380	SAMN10987724	Human	11273205010	ECC10	BROAD INSTITUTE	public	sra,bam	s3,gs,ncbi	ncbi.public,gs.US,s3.us-east-1	carcinoma (small_cell_adenocarcinoma)	metastasis	Asian	SRX5414767	Illumina HiSeq 2500	cell line	RNASeq-ECC10_STOMACH	PAIRED	cDNA	TRANSCRIPTOMIC	Homo sapiens	ILLUMINA	2019-03-27T00:00:00Z	ECC10_STOMACH	cell culture	NA	SRP186687	stomach
SRR8615634	69	RNA-Seq	GCA_000001405.13	202	22618103014	RIKEN:EBC-1	PRJNA523380	SAMN10987674	Human	12691451160	EBC-1	BROAD INSTITUTE	public	bam,sra	s3,ncbi,gs	s3.us-east-1,ncbi.public,gs.US	carcinoma (squamous_cell_carcinoma)	primary	Asian	SRX5414766	Illumina HiSeq 2500	cell line	RNASeq-EBC1_LUNG	PAIRED	cDNA	TRANSCRIPTOMIC	Homo sapiens	ILLUMINA	2019-03-27T00:00:00Z	EBC1_LUNG	cell culture	male	SRP186687	lung
SRR8615635	9	RNA-Seq	GCA_000001405.13	202	20486568108	ATCC:EB1	PRJNA523380	SAMN10987945	Human	10236768879	EB1	BROAD INSTITUTE	public	sra,bam	s3,ncbi,gs	ncbi.public,gs.US,s3.us-east-1	lymphoid_neoplasm (Burkitt_lymphoma)	primary	African_american	SRX5414765	Illumina HiSeq 2500	cell line	RNASeq-EB1_HAEMATOPOIETIC_AND_LYMPHOID_TISSUE	PAIRED	cDNA	TRANSCRIPTOMIC	Homo sapiens	ILLUMINA	2019-03-27T00:00:00Z	EB1_HAEMATOPOIETIC_AND_LYMPHOID_TISSUE	cell culture	female	SRP186687	haematopoietic_and_lymphoid_tissue
SRR8615636	50	RNA-Seq	GCA_000001405.13	202	21004769818	DSMZ:DV-90	PRJNA523380	SAMN10988133	Human	11829539920	DV-90	BROAD INSTITUTE	public	sra,bam	ncbi,gs,s3	gs.US,ncbi.public,s3.us-east-1	carcinoma (adenocarcinoma)	metastasis	Caucasian	SRX5414764	Illumina HiSeq 2500	cell line	RNASeq-DV90_LUNG	PAIRED	cDNA	TRANSCRIPTOMIC	Homo sapiens	ILLUMINA	2019-03-27T00:00:00Z	DV90_LUNG	cell culture	male	SRP186687	lung
SRR8615639	47	RNA-Seq	GCA_000001405.13	202	20541344852	DSMZ:COLO-679	PRJNA523380	SAMN10988260	Human	11603291851	COLO-679	BROAD INSTITUTE	public	bam,sra	s3,ncbi,gs	ncbi.public,s3.us-east-1,gs.US	malignant_melanoma	metastasis	Caucasian	SRX5414761	Illumina HiSeq 2500	cell line	RNASeq-COLO679_SKIN	PAIRED	cDNA	TRANSCRIPTOMIC	Homo sapiens	ILLUMINA	2019-03-27T00:00:00Z	COLO679_SKIN	cell culture	female	SRP186687	skin
SRR8615640	NA	RNA-Seq	GCA_000001405.13	202	18089756096	RIKEN:PC-14	PRJNA523380	SAMN10987800	Human	9067975943	PC-14	BROAD INSTITUTE	public	bam,sra	ncbi,s3,gs	ncbi.public,gs.US,s3.us-east-1	carcinoma (non_small_cell_carcinoma)	primary	Asian	SRX5414760	Illumina HiSeq 2500	cell line	RNASeq-PC14_LUNG	PAIRED	cDNA	TRANSCRIPTOMIC	Homo sapiens	ILLUMINA	2019-03-27T00:00:00Z	PC14_LUNG	cell culture	NA	SRP186687	lung
SRR8615641	62	RNA-Seq	GCA_000001405.13	202	14349272808	ATCC:PC-3	PRJNA523380	SAMN10988356	Human	7227781413	PC-3	BROAD INSTITUTE	public	bam,sra	gs,s3,ncbi	s3.us-east-1,gs.US,ncbi.public	carcinoma (adenocarcinoma)	metastasis	Caucasian	SRX5414759	Illumina HiSeq 2500	cell line	RNASeq-PC3_PROSTATE	PAIRED	cDNA	TRANSCRIPTOMIC	Homo sapiens	ILLUMINA	2019-03-27T00:00:00Z	PC3_PROSTATE	cell culture	male	SRP186687	prostate
SRR8615642	58	RNA-Seq	GCA_000001405.13	202	15553515402	NIBRI	PRJNA523380	SAMN10988199	Human	7735542398	786-O	BROAD INSTITUTE	public	sra,bam	s3,ncbi,gs	ncbi.public,gs.US,s3.us-east-1	carcinoma (clear_cell_renal_cell_carcinoma)	primary	Caucasian	SRX5414758	Illumina HiSeq 2500	cell line	RNASeq-786O_KIDNEY	PAIRED	cDNA	TRANSCRIPTOMIC	Homo sapiens	ILLUMINA	2019-03-27T00:00:00Z	786O_KIDNEY	cell culture	male	SRP186687	kidney
SRR8615644	78	RNA-Seq	GCA_000001405.13	202	13832224114	HSRRB	PRJNA523380	SAMN10988556	Human	6902383891	8505C	BROAD INSTITUTE	public	bam,sra	gs,s3,ncbi	gs.US,ncbi.public,s3.us-east-1	carcinoma (anaplastic_carcinoma)	primary	Asian	SRX5414756	Illumina HiSeq 2500	cell line	RNASeq-8505C_THYROID	PAIRED	cDNA	TRANSCRIPTOMIC	Homo sapiens	ILLUMINA	2019-03-27T00:00:00Z	8505C_THYROID	cell culture	female	SRP186687	thyroid
SRR8615645	67	RNA-Seq	GCA_000001405.13	202	16914045194	DSMZ:8305C	PRJNA523380	SAMN10988447	Human	8450864990	8305C	BROAD INSTITUTE	public	sra,bam	gs,s3,ncbi	gs.US,ncbi.public,s3.us-east-1	carcinoma (anaplastic_carcinoma)	primary	Asian	SRX5414755	Illumina HiSeq 2500	cell line	RNASeq-8305C_THYROID	PAIRED	cDNA	TRANSCRIPTOMIC	Homo sapiens	ILLUMINA	2019-03-27T00:00:00Z	8305C_THYROID	cell culture	female	SRP186687	thyroid
SRR8615646	56	RNA-Seq	GCA_000001405.13	202	17889997488	GNF	PRJNA523380	SAMN10988170	Human	8960247133	A101D	BROAD INSTITUTE	public	sra,bam	ncbi,gs,s3	ncbi.public,s3.us-east-1,gs.US	malignant_melanoma	primary	Caucasian	SRX5414754	Illumina HiSeq 2500	cell line	RNASeq-A101D_SKIN	PAIRED	cDNA	TRANSCRIPTOMIC	Homo sapiens	ILLUMINA	2019-03-27T00:00:00Z	A101D_SKIN	cell culture	male	SRP186687	skin
SRR8615647	54	RNA-Seq	GCA_000001405.13	202	18920349998	DSMZ:8-MG-BA	PRJNA523380	SAMN10988303	Human	9483765811	8-MG-BA	BROAD INSTITUTE	public	sra,bam	gs,s3,ncbi	s3.us-east-1,gs.US,ncbi.public	glioma (astrocytoma_Grade_IV\, glioblastoma_multiforme)	primary	Caucasian	SRX5414753	Illumina HiSeq 2500	cell line	RNASeq-8MGBA_CENTRAL_NERVOUS_SYSTEM	PAIRED	cDNA	TRANSCRIPTOMIC	Homo sapiens	ILLUMINA	2019-03-27T00:00:00Z	8MGBA_CENTRAL_NERVOUS_SYSTEM	cell culture	female	SRP186687	central_nervous_system
SRR8615648	53	RNA-Seq	GCA_000001405.13	202	16245215114	ATCC:A172	PRJNA523380	SAMN10988258	Human	8622852164	A172	BROAD INSTITUTE	public	sra,bam	s3,ncbi,gs	ncbi.public,s3.us-east-1,gs.US	glioma (astrocytoma_Grade_IV\, glioblastoma_multiforme)	primary	Caucasian	SRX5414752	Illumina HiSeq 2500	cell line	RNASeq-A172_CENTRAL_NERVOUS_SYSTEM	PAIRED	cDNA	TRANSCRIPTOMIC	Homo sapiens	ILLUMINA	2019-03-27T00:00:00Z	A172_CENTRAL_NERVOUS_SYSTEM	cell culture	male	SRP186687	central_nervous_system
SRR8615649	NA	RNA-Seq	GCA_000001405.13	202	12577931374	NA	PRJNA523380	SAMN10988410	Human	6711232386	A1207	BROAD INSTITUTE	public	bam,sra	ncbi,s3,gs	s3.us-east-1,gs.US,ncbi.public	glioma	NA	Caucasian	SRX5414751	Illumina HiSeq 2500	cell line	RNASeq-A1207_CENTRAL_NERVOUS_SYSTEM	PAIRED	cDNA	TRANSCRIPTOMIC	Homo sapiens	ILLUMINA	2019-03-27T00:00:00Z	A1207_CENTRAL_NERVOUS_SYSTEM	cell culture	female	SRP186687	central_nervous_system
SRR8615650	43	RNA-Seq	GCA_000001405.13	202	17137084706	NIBRI	PRJNA523380	SAMN10987958	Human	8648389254	SNU-475	BROAD INSTITUTE	public	sra,bam	gs,s3,ncbi	ncbi.public,s3.us-east-1,gs.US	carcinoma (hepatocellular_carcinoma)	primary	Asian	SRX5414750	Illumina HiSeq 2500	cell line	RNASeq-SNU475_LIVER	PAIRED	cDNA	TRANSCRIPTOMIC	Homo sapiens	ILLUMINA	2019-03-27T00:00:00Z	SNU475_LIVER	cell culture	male	SRP186687	liver
SRR8615651	NA	RNA-Seq	GCA_000001405.13	202	17147241064	KCLB:SNU-478	PRJNA523380	SAMN10988084	Human	9239609915	SNU-478	BROAD INSTITUTE	public	sra,bam	s3,gs,ncbi	ncbi.public,s3.us-east-1,gs.US	carcinoma	primary	Asian	SRX5414749	Illumina HiSeq 2500	cell line	RNASeq-SNU478_BILIARY_TRACT	PAIRED	cDNA	TRANSCRIPTOMIC	Homo sapiens	ILLUMINA	2019-03-27T00:00:00Z	SNU478_BILIARY_TRACT	cell culture	NA	SRP186687	biliary_tract
SRR8615652	54	RNA-Seq	GCA_000001405.13	202	19686350562	KCLB:SNU-489	PRJNA523380	SAMN10988061	Human	10578745311	SNU-489	BROAD INSTITUTE	public	bam,sra	ncbi,s3,gs	s3.us-east-1,ncbi.public,gs.US	glioma (astrocytoma_Grade_IV\, glioblastoma_multiforme)	primary	Asian	SRX5414748	Illumina HiSeq 2500	cell line	RNASeq-SNU489_CENTRAL_NERVOUS_SYSTEM	PAIRED	cDNA	TRANSCRIPTOMIC	Homo sapiens	ILLUMINA	2019-03-27T00:00:00Z	SNU489_CENTRAL_NERVOUS_SYSTEM	cell culture	male	SRP186687	central_nervous_system
SRR8615654	40	RNA-Seq	GCA_000001405.13	202	15557858806	NIBRI	PRJNA523380	SAMN10987943	Human	7796146603	SNU-423	BROAD INSTITUTE	public	sra,bam	ncbi,gs,s3	gs.US,s3.us-east-1,ncbi.public	carcinoma (hepatocellular_carcinoma)	primary	Asian	SRX5414746	Illumina HiSeq 2500	cell line	RNASeq-SNU423_LIVER	PAIRED	cDNA	TRANSCRIPTOMIC	Homo sapiens	ILLUMINA	2019-03-27T00:00:00Z	SNU423_LIVER	cell culture	male	SRP186687	liver
SRR8615655	52	RNA-Seq	GCA_000001405.13	202	21325120406	NIBRI	PRJNA523380	SAMN10987611	Human	11468754972	SNU-449	BROAD INSTITUTE	public	sra,bam	gs,s3,ncbi	ncbi.public,s3.us-east-1,gs.US	carcinoma (hepatocellular_carcinoma)	primary	Asian	SRX5414745	Illumina HiSeq 2500	cell line	RNASeq-SNU449_LIVER	PAIRED	cDNA	TRANSCRIPTOMIC	Homo sapiens	ILLUMINA	2019-03-27T00:00:00Z	SNU449_LIVER	cell culture	male	SRP186687	liver
SRR8615656	61	RNA-Seq	GCA_000001405.13	202	18080116858	KCLB:SNU-466	PRJNA523380	SAMN10988076	Human	9734531452	SNU-466	BROAD INSTITUTE	public	bam,sra	s3,ncbi,gs	gs.US,s3.us-east-1,ncbi.public	glioma (astrocytoma_Grade_IV\, glioblastoma_multiforme)	primary	Asian	SRX5414744	Illumina HiSeq 2500	cell line	RNASeq-SNU466_CENTRAL_NERVOUS_SYSTEM	PAIRED	cDNA	TRANSCRIPTOMIC	Homo sapiens	ILLUMINA	2019-03-27T00:00:00Z	SNU466_CENTRAL_NERVOUS_SYSTEM	cell culture	male	SRP186687	central_nervous_system
SRR8615657	66	RNA-Seq	GCA_000001405.13	202	15967864872	KCLB:SNU-46	PRJNA523380	SAMN10988080	Human	7373107865	SNU-46	BROAD INSTITUTE	public	sra,bam	ncbi,gs,s3	s3.us-east-1,gs.US,ncbi.public	carcinoma (squamous_cell_carcinoma)	primary	Asian	SRX5414743	Illumina HiSeq 2500	cell line	RNASeq-SNU46_UPPER_AERODIGESTIVE_TRACT	PAIRED	cDNA	TRANSCRIPTOMIC	Homo sapiens	ILLUMINA	2019-03-27T00:00:00Z	SNU46_UPPER_AERODIGESTIVE_TRACT	cell culture	male	SRP186687	upper_aerodigestive_tract
SRR8615658	60	RNA-Seq	GCA_000001405.13	202	21528246960	KCLB:SNU-520	PRJNA523380	SAMN10987747	Human	11593853210	SNU-520	BROAD INSTITUTE	public	sra,bam	s3,ncbi,gs	s3.us-east-1,gs.US,ncbi.public	carcinoma	primary	Asian	SRX5414742	Illumina HiSeq 2500	cell line	RNASeq-SNU520_STOMACH	PAIRED	cDNA	TRANSCRIPTOMIC	Homo sapiens	ILLUMINA	2019-03-27T00:00:00Z	SNU520_STOMACH	cell culture	female	SRP186687	stomach
SRR8615659	33	RNA-Seq	GCA_000001405.13	202	22373259420	NIBRI	PRJNA523380	SAMN10987957	Human	12032210780	SNU-5	BROAD INSTITUTE	public	bam,sra	gs,ncbi,s3	s3.us-east-1,ncbi.public,gs.US	carcinoma (undifferentiated_adenocarcinoma)	metastasis	Asian	SRX5414741	Illumina HiSeq 2500	cell line	RNASeq-SNU5_STOMACH	PAIRED	cDNA	TRANSCRIPTOMIC	Homo sapiens	ILLUMINA	2019-03-27T00:00:00Z	SNU5_STOMACH	cell culture	female	SRP186687	stomach
SRR8615660	NA	RNA-Seq	GCA_000001405.13	202	18438999754	NIBRI	PRJNA523380	SAMN10987603	Human	9098667396	HuNS1	BROAD INSTITUTE	public	bam,sra	gs,s3,ncbi	gs.US,ncbi.public,s3.us-east-1	lymphoid_neoplasm (plasma_cell_myeloma)	primary	Caucasian	SRX5414740	Illumina HiSeq 2500	cell line	RNASeq-HUNS1_HAEMATOPOIETIC_AND_LYMPHOID_TISSUE	PAIRED	cDNA	TRANSCRIPTOMIC	Homo sapiens	ILLUMINA	2019-03-27T00:00:00Z	HUNS1_HAEMATOPOIETIC_AND_LYMPHOID_TISSUE	cell culture	male	SRP186687	haematopoietic_and_lymphoid_tissue
SRR8615661	57	RNA-Seq	GCA_000001405.13	202	18118600888	HSSRB	PRJNA523380	SAMN10987834	Human	8890602349	HuH-7	BROAD INSTITUTE	public	sra,bam	gs,ncbi,s3	gs.US,s3.us-east-1,ncbi.public	carcinoma (hepatocellular_carcinoma)	primary	Asian	SRX5414739	Illumina HiSeq 2500	cell line	RNASeq-HUH7_LIVER	PAIRED	cDNA	TRANSCRIPTOMIC	Homo sapiens	ILLUMINA	2019-03-27T00:00:00Z	HUH7_LIVER	cell culture	male	SRP186687	liver
SRR8615662	NA	RNA-Seq	GCA_000001405.13	202	16715160438	RIKEN:HuH-6	PRJNA523380	SAMN10987713	Human	8241113408	HuH-6	BROAD INSTITUTE	public	sra,bam	s3,ncbi,gs	gs.US,s3.us-east-1,ncbi.public	other (hepatoblastoma)	primary	Asian	SRX5414738	Illumina HiSeq 2500	cell line	RNASeq-HUH6_LIVER	PAIRED	cDNA	TRANSCRIPTOMIC	Homo sapiens	ILLUMINA	2019-03-27T00:00:00Z	HUH6_LIVER	cell culture	male	SRP186687	liver
SRR8615664	35	RNA-Seq	GCA_000001405.13	202	17720962474	HSRRB	PRJNA523380	SAMN10988262	Human	8745732022	huH-1	BROAD INSTITUTE	public	sra,bam	s3,ncbi,gs	gs.US,s3.us-east-1,ncbi.public	carcinoma (hepatocellular_carcinoma)	primary	Asian	SRX5414736	Illumina HiSeq 2500	cell line	RNASeq-HUH1_LIVER	PAIRED	cDNA	TRANSCRIPTOMIC	Homo sapiens	ILLUMINA	2019-03-27T00:00:00Z	HUH1_LIVER	cell culture	male	SRP186687	liver
SRR8615665	55	RNA-Seq	GCA_000001405.13	202	19766214292	GNF	PRJNA523380	SAMN10987865	Human	9724748543	HuG1-N	BROAD INSTITUTE	public	sra,bam	s3,ncbi,gs	ncbi.public,s3.us-east-1,gs.US	carcinoma	primary	Asian	SRX5414735	Illumina HiSeq 2500	cell line	RNASeq-HUG1N_STOMACH	PAIRED	cDNA	TRANSCRIPTOMIC	Homo sapiens	ILLUMINA	2019-03-27T00:00:00Z	HUG1N_STOMACH	cell culture	male	SRP186687	stomach
SRR8615666	NA	RNA-Seq	GCA_000001405.13	202	18183540656	HSSRB	PRJNA523380	SAMN10987837	Human	9056963250	HuCCT1	BROAD INSTITUTE	public	sra,bam	gs,s3,ncbi	gs.US,ncbi.public,s3.us-east-1	carcinoma	primary	Asian	SRX5414734	Illumina HiSeq 2500	cell line	RNASeq-HUCCT1_BILIARY_TRACT	PAIRED	cDNA	TRANSCRIPTOMIC	Homo sapiens	ILLUMINA	2019-03-27T00:00:00Z	HUCCT1_BILIARY_TRACT	cell culture	male	SRP186687	biliary_tract
SRR8615667	70	RNA-Seq	GCA_000001405.13	202	19998788608	NIBRI	PRJNA523380	SAMN10987949	Human	9869437781	HT	BROAD INSTITUTE	public	sra,bam	s3,ncbi,gs	s3.us-east-1,gs.US,ncbi.public	lymphoid_neoplasm (B_cell_lymphoma_unspecified)	metastasis	Caucasian	SRX5414733	Illumina HiSeq 2500	cell line	RNASeq-HT_HAEMATOPOIETIC_AND_LYMPHOID_TISSUE	PAIRED	cDNA	TRANSCRIPTOMIC	Homo sapiens	ILLUMINA	2019-03-27T00:00:00Z	HT_HAEMATOPOIETIC_AND_LYMPHOID_TISSUE	cell culture	male	SRP186687	haematopoietic_and_lymphoid_tissue
SRR8615668	60	RNA-Seq	GCA_000001405.13	202	18091727212	DSMZ:HUP-T4	PRJNA523380	SAMN10988380	Human	9037077319	HUP-T4	BROAD INSTITUTE	public	bam,sra	gs,s3,ncbi	ncbi.public,s3.us-east-1,gs.US	carcinoma	metastasis	Asian	SRX5414732	Illumina HiSeq 2500	cell line	RNASeq-HUPT4_PANCREAS	PAIRED	cDNA	TRANSCRIPTOMIC	Homo sapiens	ILLUMINA	2019-03-27T00:00:00Z	HUPT4_PANCREAS	cell culture	male	SRP186687	pancreas
SRR8615669	66	RNA-Seq	GCA_000001405.13	202	18921757938	DSMZ:HUP-T3	PRJNA523380	SAMN10987811	Human	9329937981	HUP-T3	BROAD INSTITUTE	public	bam,sra	ncbi,s3,gs	ncbi.public,s3.us-east-1,gs.US	carcinoma	metastasis	Asian	SRX5414731	Illumina HiSeq 2500	cell line	RNASeq-HUPT3_PANCREAS	PAIRED	cDNA	TRANSCRIPTOMIC	Homo sapiens	ILLUMINA	2019-03-27T00:00:00Z	HUPT3_PANCREAS	cell culture	male	SRP186687	pancreas
SRR8615670	45	RNA-Seq	GCA_000001405.13	202	17325178824	ECACC:PE/CA-PJ15	PRJNA523380	SAMN10988005	Human	9411168500	PE/CA-PJ15	BROAD INSTITUTE	public	bam,sra	s3,gs,ncbi	gs.US,s3.us-east-1,ncbi.public	carcinoma (squamous_cell_carcinoma)	primary	Caucasian	SRX5414730	Illumina HiSeq 2500	cell line	RNASeq-PECAPJ15_UPPER_AERODIGESTIVE_TRACT	PAIRED	cDNA	TRANSCRIPTOMIC	Homo sapiens	ILLUMINA	2019-03-27T00:00:00Z	PECAPJ15_UPPER_AERODIGESTIVE_TRACT	cell culture	male	SRP186687	upper_aerodigestive_tract
SRR8615671	80	RNA-Seq	GCA_000001405.13	202	30942671484	ATCC:SW 780	PRJNA523380	SAMN10988174	Human	14849400248	SW 780	BROAD INSTITUTE	public	sra,bam	gs,s3,ncbi	s3.us-east-1,gs.US,ncbi.public	carcinoma (transitional_cell_carcinoma)	primary	Caucasian	SRX5414729	Illumina HiSeq 2500	cell line	RNASeq-SW780_URINARY_TRACT	PAIRED	cDNA	TRANSCRIPTOMIC	Homo sapiens	ILLUMINA	2019-03-27T00:00:00Z	SW780_URINARY_TRACT	cell culture	female	SRP186687	urinary_tract
SRR8615673	63	RNA-Seq	GCA_000001405.13	202	17844209744	DSMZ:SIG-M5	PRJNA523380	SAMN10989556	Human	9592465662	SIG-M5	BROAD INSTITUTE	public	bam,sra	ncbi,s3,gs	ncbi.public,gs.US,s3.us-east-1	haematopoietic_neoplasm (acute_myeloid_leukaemia\, M5a)	primary	Caucasian	SRX5414727	Illumina HiSeq 2500	cell line	RNASeq-SIGM5_HAEMATOPOIETIC_AND_LYMPHOID_TISSUE	PAIRED	cDNA	TRANSCRIPTOMIC	Homo sapiens	ILLUMINA	2019-03-27T00:00:00Z	SIGM5_HAEMATOPOIETIC_AND_LYMPHOID_TISSUE	cell culture	male	SRP186687	haematopoietic_and_lymphoid_tissue
SRR8615674	54	RNA-Seq	GCA_000001405.13	202	17470110592	ATCC:SHP-77	PRJNA523380	SAMN10988529	Human	8807090367	SHP-77	BROAD INSTITUTE	public	bam,sra	gs,ncbi,s3	s3.us-east-1,gs.US,ncbi.public	carcinoma (small_cell_carcinoma)	primary	Caucasian	SRX5414726	Illumina HiSeq 2500	cell line	RNASeq-SHP77_LUNG	PAIRED	cDNA	TRANSCRIPTOMIC	Homo sapiens	ILLUMINA	2019-03-27T00:00:00Z	SHP77_LUNG	cell culture	male	SRP186687	lung
SRR8615675	1.6666	RNA-Seq	GCA_000001405.13	202	20457106610	DSMZ:SIMA	PRJNA523380	SAMN10988579	Human	10972783766	SIMA	BROAD INSTITUTE	public	bam,sra	s3,ncbi,gs	s3.us-east-1,gs.US,ncbi.public	neuroblastoma	primary	Caucasian	SRX5414725	Illumina HiSeq 2500	cell line	RNASeq-SIMA_AUTONOMIC_GANGLIA	PAIRED	cDNA	TRANSCRIPTOMIC	Homo sapiens	ILLUMINA	2019-03-27T00:00:00Z	SIMA_AUTONOMIC_GANGLIA	cell culture	male	SRP186687	autonomic_ganglia
SRR8615676	NA	RNA-Seq	GCA_000001405.13	202	19217495634	NA	PRJNA523380	SAMN10989623	Human	10257032643	SIHA	BROAD INSTITUTE	public	bam,sra	gs,ncbi,s3	s3.us-east-1,gs.US,ncbi.public	NA	NA	NA	SRX5414724	Illumina HiSeq 2500	cell line	RNASeq-SIHA_CERVIX	PAIRED	cDNA	TRANSCRIPTOMIC	Homo sapiens	ILLUMINA	2019-03-27T00:00:00Z	SIHA_CERVIX	cell culture	NA	SRP186687	cervix
SRR8615678	19	RNA-Seq	GCA_000001405.13	202	16014711500	ATCC:SJSA-1	PRJNA523380	SAMN10987778	Human	7998418454	SJSA-1	BROAD INSTITUTE	public	bam,sra	s3,ncbi,gs	ncbi.public,s3.us-east-1,gs.US	osteosarcoma	primary	African_american	SRX5414722	Illumina HiSeq 2500	cell line	RNASeq-SJSA1_BONE	PAIRED	cDNA	TRANSCRIPTOMIC	Homo sapiens	ILLUMINA	2019-03-27T00:00:00Z	SJSA1_BONE	cell culture	male	SRP186687	bone
SRR8615681	43	RNA-Seq	GCA_000001405.13	202	15755103322	NIBRI	PRJNA523380	SAMN10988181	Human	7912199968	SK-LMS-1	BROAD INSTITUTE	public	sra,bam	ncbi,gs,s3	ncbi.public,s3.us-east-1,gs.US	sarcoma	primary	Caucasian	SRX5414719	Illumina HiSeq 2500	cell line	RNASeq-SKLMS1_SOFT_TISSUE	PAIRED	cDNA	TRANSCRIPTOMIC	Homo sapiens	ILLUMINA	2019-03-27T00:00:00Z	SKLMS1_SOFT_TISSUE	cell culture	female	SRP186687	soft_tissue
SRR8615682	52	RNA-Seq	GCA_000001405.13	202	16952460948	ATCC:SK-HEP-1	PRJNA523380	SAMN10988022	Human	8529805672	SK-HEP-1	BROAD INSTITUTE	public	sra,bam	s3,ncbi,gs	ncbi.public,s3.us-east-1,gs.US	carcinoma (adenocarcinoma)	metastasis	Caucasian	SRX5414718	Illumina HiSeq 2500	cell line	RNASeq-SKHEP1_LIVER	PAIRED	cDNA	TRANSCRIPTOMIC	Homo sapiens	ILLUMINA	2019-03-27T00:00:00Z	SKHEP1_LIVER	cell culture	male	SRP186687	liver
SRR8615684	29	RNA-Seq	GCA_000001405.13	202	17926765326	DSMZ:LAMA-84	PRJNA523380	SAMN10988484	Human	9528856843	LAMA-84	BROAD INSTITUTE	public	sra,bam	s3,gs,ncbi	gs.US,ncbi.public,s3.us-east-1	haematopoietic_neoplasm (blast_phase_chronic_myeloid_leukaemia)	primary	Caucasian	SRX5414716	Illumina HiSeq 2500	cell line	RNASeq-LAMA84_HAEMATOPOIETIC_AND_LYMPHOID_TISSUE	PAIRED	cDNA	TRANSCRIPTOMIC	Homo sapiens	ILLUMINA	2019-03-27T00:00:00Z	LAMA84_HAEMATOPOIETIC_AND_LYMPHOID_TISSUE	cell culture	female	SRP186687	haematopoietic_and_lymphoid_tissue
SRR8615686	26	RNA-Seq	GCA_000001405.13	202	21681289836	DSMZ:MUTZ-5	PRJNA523380	SAMN10988511	Human	11491986570	MUTZ-5	BROAD INSTITUTE	public	sra,bam	gs,ncbi,s3	gs.US,ncbi.public,s3.us-east-1	lymphoid_neoplasm (acute_lymphoblastic_B_cell_leukaemia)	primary	Caucasian	SRX5414714	Illumina HiSeq 2500	cell line	RNASeq-MUTZ5_HAEMATOPOIETIC_AND_LYMPHOID_TISSUE	PAIRED	cDNA	TRANSCRIPTOMIC	Homo sapiens	ILLUMINA	2019-03-27T00:00:00Z	MUTZ5_HAEMATOPOIETIC_AND_LYMPHOID_TISSUE	cell culture	male	SRP186687	haematopoietic_and_lymphoid_tissue
SRR8615687	10	RNA-Seq	GCA_000001405.13	202	19848675742	ATCC:MV-4-11	PRJNA523380	SAMN10988366	Human	9933597749	MV-4-11	BROAD INSTITUTE	public	sra,bam	s3,gs,ncbi	gs.US,ncbi.public,s3.us-east-1	haematopoietic_neoplasm (acute_myeloid_leukaemia\, M5)	primary	Caucasian	SRX5414713	Illumina HiSeq 2500	cell line	RNASeq-MV411_HAEMATOPOIETIC_AND_LYMPHOID_TISSUE	PAIRED	cDNA	TRANSCRIPTOMIC	Homo sapiens	ILLUMINA	2019-03-27T00:00:00Z	MV411_HAEMATOPOIETIC_AND_LYMPHOID_TISSUE	cell culture	male	SRP186687	haematopoietic_and_lymphoid_tissue
SRR8615690	NA	RNA-Seq	GCA_000001405.13	202	15676185154	GNF	PRJNA523380	SAMN10988290	Human	7868884900	U-251 MG	BROAD INSTITUTE	public	bam,sra	s3,gs,ncbi	ncbi.public,s3.us-east-1,gs.US	glioma (astrocytoma)	primary	Caucasian	SRX5414710	Illumina HiSeq 2500	cell line	RNASeq-U251MG_CENTRAL_NERVOUS_SYSTEM	PAIRED	cDNA	TRANSCRIPTOMIC	Homo sapiens	ILLUMINA	2019-03-27T00:00:00Z	U251MG_CENTRAL_NERVOUS_SYSTEM	cell culture	male	SRP186687	central_nervous_system
SRR8615691	44	RNA-Seq	GCA_000001405.13	202	19619480482	DSMZ:PA-TU-8902	PRJNA523380	SAMN10987803	Human	9837669305	PA-TU-8902	BROAD INSTITUTE	public	bam,sra	gs,ncbi,s3	gs.US,s3.us-east-1,ncbi.public	carcinoma (ductal_carcinoma)	primary	Caucasian	SRX5414709	Illumina HiSeq 2500	cell line	RNASeq-PATU8902_PANCREAS	PAIRED	cDNA	TRANSCRIPTOMIC	Homo sapiens	ILLUMINA	2019-03-27T00:00:00Z	PATU8902_PANCREAS	cell culture	female	SRP186687	pancreas
SRR8615692	15	RNA-Seq	GCA_000001405.13	202	15528940486	ATCC:U-2 OS	PRJNA523380	SAMN10987914	Human	7816277728	U-2 OS	BROAD INSTITUTE	public	sra,bam	gs,s3,ncbi	ncbi.public,gs.US,s3.us-east-1	osteosarcoma	primary	Caucasian	SRX5414708	Illumina HiSeq 2500	cell line	RNASeq-U2OS_BONE	PAIRED	cDNA	TRANSCRIPTOMIC	Homo sapiens	ILLUMINA	2019-03-27T00:00:00Z	U2OS_BONE	cell culture	female	SRP186687	bone
SRR8615695	64	RNA-Seq	GCA_000001405.13	202	15835403978	DSMZ:MONO-MAC-1	PRJNA523380	SAMN10988495	Human	8432321741	MONO-MAC-1	BROAD INSTITUTE	public	sra,bam	ncbi,gs,s3	s3.us-east-1,ncbi.public,gs.US	haematopoietic_neoplasm (acute_myeloid_leukaemia\, M5)	primary	Caucasian	SRX5414705	Illumina HiSeq 2500	cell line	RNASeq-MONOMAC1_HAEMATOPOIETIC_AND_LYMPHOID_TISSUE	PAIRED	cDNA	TRANSCRIPTOMIC	Homo sapiens	ILLUMINA	2019-03-27T00:00:00Z	MONOMAC1_HAEMATOPOIETIC_AND_LYMPHOID_TISSUE	cell culture	male	SRP186687	haematopoietic_and_lymphoid_tissue
SRR8615696	64	RNA-Seq	GCA_000001405.13	202	19718415840	DSMZ:MONO-MAC-6	PRJNA523380	SAMN10988430	Human	10495952745	MONO-MAC-6	BROAD INSTITUTE	public	bam,sra	gs,s3,ncbi	ncbi.public,gs.US,s3.us-east-1	haematopoietic_neoplasm (acute_myeloid_leukaemia\, M5)	primary	Caucasian	SRX5414704	Illumina HiSeq 2500	cell line	RNASeq-MONOMAC6_HAEMATOPOIETIC_AND_LYMPHOID_TISSUE	PAIRED	cDNA	TRANSCRIPTOMIC	Homo sapiens	ILLUMINA	2019-03-27T00:00:00Z	MONOMAC6_HAEMATOPOIETIC_AND_LYMPHOID_TISSUE	cell culture	male	SRP186687	haematopoietic_and_lymphoid_tissue
SRR8615698	NA	RNA-Seq	GCA_000001405.13	202	15757422080	ECACC:MOR/CPR	PRJNA523380	SAMN10987872	Human	7916229548	MOR/CPR	BROAD INSTITUTE	public	bam,sra	s3,ncbi,gs	gs.US,ncbi.public,s3.us-east-1	carcinoma (adenocarcinoma)	primary	Caucasian	SRX5414702	Illumina HiSeq 2500	cell line	RNASeq-MORCPR_LUNG	PAIRED	cDNA	TRANSCRIPTOMIC	Homo sapiens	ILLUMINA	2019-03-27T00:00:00Z	MORCPR_LUNG	cell culture	NA	SRP186687	lung
SRR8615699	67	RNA-Seq	GCA_000001405.13	202	23625463278	GNF	PRJNA523380	SAMN10988144	Human	12423348728	MPP 89	BROAD INSTITUTE	public	sra,bam	ncbi,s3,gs	gs.US,ncbi.public,s3.us-east-1	mesothelioma	metastasis	Caucasian	SRX5414701	Illumina HiSeq 2500	cell line	RNASeq-MPP89_PLEURA	PAIRED	cDNA	TRANSCRIPTOMIC	Homo sapiens	ILLUMINA	2019-03-27T00:00:00Z	MPP89_PLEURA	cell culture	male	SRP186687	pleura
SRR8615703	16	RNA-Seq	GCA_000001405.13	202	14533266124	HSSRB	PRJNA523380	SAMN10987931	Human	6835661904	KNS-42	BROAD INSTITUTE	public	sra,bam	s3,ncbi,gs	ncbi.public,s3.us-east-1,gs.US	glioma	primary	Asian	SRX5414697	Illumina HiSeq 2500	cell line	RNASeq-KNS42_CENTRAL_NERVOUS_SYSTEM	PAIRED	cDNA	TRANSCRIPTOMIC	Homo sapiens	ILLUMINA	2019-03-27T00:00:00Z	KNS42_CENTRAL_NERVOUS_SYSTEM	cell culture	male	SRP186687	central_nervous_system
SRR8615704	73	RNA-Seq	GCA_000001405.13	202	13602600412	DSMZ:KARPAS-422	PRJNA523380	SAMN10988506	Human	6436617921	KARPAS-422	BROAD INSTITUTE	public	sra,bam	gs,ncbi,s3	ncbi.public,s3.us-east-1,gs.US	lymphoid_neoplasm (diffuse_large_B_cell_lymphoma)	metastasis	Caucasian	SRX5414696	Illumina HiSeq 2500	cell line	RNASeq-KARPAS422_HAEMATOPOIETIC_AND_LYMPHOID_TISSUE	PAIRED	cDNA	TRANSCRIPTOMIC	Homo sapiens	ILLUMINA	2019-03-27T00:00:00Z	KARPAS422_HAEMATOPOIETIC_AND_LYMPHOID_TISSUE	cell culture	female	SRP186687	haematopoietic_and_lymphoid_tissue
SRR8615707	46	RNA-Seq	GCA_000001405.13	202	16859141594	HSSRB	PRJNA523380	SAMN10987820	Human	7787846365	KO52	BROAD INSTITUTE	public	bam,sra	s3,ncbi,gs	s3.us-east-1,ncbi.public,gs.US	haematopoietic_neoplasm (acute_myeloid_leukaemia\, M2)	primary	Asian	SRX5414693	Illumina HiSeq 2500	cell line	RNASeq-KO52_HAEMATOPOIETIC_AND_LYMPHOID_TISSUE	PAIRED	cDNA	TRANSCRIPTOMIC	Homo sapiens	ILLUMINA	2019-03-27T00:00:00Z	KO52_HAEMATOPOIETIC_AND_LYMPHOID_TISSUE	cell culture	male	SRP186687	haematopoietic_and_lymphoid_tissue
SRR8615708	65	RNA-Seq	GCA_000001405.13	202	17979834160	HSSRB	PRJNA523380	SAMN10987823	Human	9505830653	KNS-81	BROAD INSTITUTE	public	sra,bam	ncbi,s3,gs	s3.us-east-1,gs.US,ncbi.public	glioma (astrocytoma_Grade_IV\, glioblastoma_multiforme)	primary	Asian	SRX5414692	Illumina HiSeq 2500	cell line	RNASeq-KNS81_CENTRAL_NERVOUS_SYSTEM	PAIRED	cDNA	TRANSCRIPTOMIC	Homo sapiens	ILLUMINA	2019-03-27T00:00:00Z	KNS81_CENTRAL_NERVOUS_SYSTEM	cell culture	male	SRP186687	central_nervous_system
SRR8615709	49	RNA-Seq	GCA_000001405.13	202	13190926432	ATCC:KNS-62	PRJNA523380	SAMN10987892	Human	6756302559	KNS-62	BROAD INSTITUTE	public	sra,bam	gs,s3,ncbi	ncbi.public,s3.us-east-1,gs.US	carcinoma (squamous_cell_carcinoma)	metastasis	Asian	SRX5414691	Illumina HiSeq 2500	cell line	RNASeq-KNS62_LUNG	PAIRED	cDNA	TRANSCRIPTOMIC	Homo sapiens	ILLUMINA	2019-03-27T00:00:00Z	KNS62_LUNG	cell culture	male	SRP186687	lung
SRR8615711	73	RNA-Seq	GCA_000001405.13	202	14869463006	DSMZ:JVM-3	PRJNA523380	SAMN10988549	Human	7018341730	JVM-3	BROAD INSTITUTE	public	bam,sra	ncbi,gs,s3	s3.us-east-1,gs.US,ncbi.public	lymphoid_neoplasm (chronic_lymphocytic_leukaemia-small_lymphocytic_lymphoma)	primary	Caucasian	SRX5414689	Illumina HiSeq 2500	cell line	RNASeq-JVM3_HAEMATOPOIETIC_AND_LYMPHOID_TISSUE	PAIRED	cDNA	TRANSCRIPTOMIC	Homo sapiens	ILLUMINA	2019-03-27T00:00:00Z	JVM3_HAEMATOPOIETIC_AND_LYMPHOID_TISSUE	cell culture	male	SRP186687	haematopoietic_and_lymphoid_tissue
SRR8615712	14	RNA-Seq	GCA_000001405.13	202	13907032794	DSMZ:JURKAT	PRJNA523380	SAMN10988565	Human	6611183216	JURKAT	BROAD INSTITUTE	public	bam,sra	s3,gs,ncbi	ncbi.public,gs.US,s3.us-east-1	lymphoid_neoplasm (acute_lymphoblastic_T_cell_leukaemia)	primary	Caucasian	SRX5414688	Illumina HiSeq 2500	cell line	RNASeq-JURKAT_HAEMATOPOIETIC_AND_LYMPHOID_TISSUE	PAIRED	cDNA	TRANSCRIPTOMIC	Homo sapiens	ILLUMINA	2019-03-27T00:00:00Z	JURKAT_HAEMATOPOIETIC_AND_LYMPHOID_TISSUE	cell culture	male	SRP186687	haematopoietic_and_lymphoid_tissue
SRR8615713	73	RNA-Seq	GCA_000001405.13	202	13615420746	DSMZ:JURL-MK1	PRJNA523380	SAMN10988501	Human	6417093046	JURL-MK1	BROAD INSTITUTE	public	sra,bam	s3,ncbi,gs	ncbi.public,s3.us-east-1,gs.US	haematopoietic_neoplasm (blast_phase_chronic_myeloid_leukaemia)	primary	Caucasian	SRX5414687	Illumina HiSeq 2500	cell line	RNASeq-JURLMK1_HAEMATOPOIETIC_AND_LYMPHOID_TISSUE	PAIRED	cDNA	TRANSCRIPTOMIC	Homo sapiens	ILLUMINA	2019-03-27T00:00:00Z	JURLMK1_HAEMATOPOIETIC_AND_LYMPHOID_TISSUE	cell culture	male	SRP186687	haematopoietic_and_lymphoid_tissue
SRR8615714	NA	RNA-Seq	GCA_000001405.13	202	19232979136	HSSRB	PRJNA523380	SAMN10987840	Human	10271199824	KALS-1	BROAD INSTITUTE	public	sra,bam	gs,s3,ncbi	s3.us-east-1,ncbi.public,gs.US	glioma	primary	Asian	SRX5414686	Illumina HiSeq 2500	cell line	RNASeq-KALS1_CENTRAL_NERVOUS_SYSTEM	PAIRED	cDNA	TRANSCRIPTOMIC	Homo sapiens	ILLUMINA	2019-03-27T00:00:00Z	KALS1_CENTRAL_NERVOUS_SYSTEM	cell culture	female	SRP186687	central_nervous_system
SRR8615715	25	RNA-Seq	GCA_000001405.13	202	12801638294	ECAAC	PRJNA523380	SAMN10988031	Human	6081026791	KARPAS-299	BROAD INSTITUTE	public	bam,sra	ncbi,gs,s3	s3.us-east-1,ncbi.public,gs.US	lymphoid_neoplasm (anaplastic_large_cell_lymphoma)	primary	Caucasian	SRX5414685	Illumina HiSeq 2500	cell line	RNASeq-KARPAS299_HAEMATOPOIETIC_AND_LYMPHOID_TISSUE	PAIRED	cDNA	TRANSCRIPTOMIC	Homo sapiens	ILLUMINA	2019-03-27T00:00:00Z	KARPAS299_HAEMATOPOIETIC_AND_LYMPHOID_TISSUE	cell culture	male	SRP186687	haematopoietic_and_lymphoid_tissue
SRR8615718	2	RNA-Seq	GCA_000001405.13	202	21128877608	DSMZ:RH-18	PRJNA523380	SAMN10989566	Human	11403414978	RH-18	BROAD INSTITUTE	public	sra,bam	s3,gs,ncbi	s3.us-east-1,ncbi.public,gs.US	rhabdomyosarcoma (alveolar)	primary	NA	SRX5414682	Illumina HiSeq 2500	cell line	RNASeq-RH18_SOFT_TISSUE	PAIRED	cDNA	TRANSCRIPTOMIC	Homo sapiens	ILLUMINA	2019-03-27T00:00:00Z	RH18_SOFT_TISSUE	cell culture	female	SRP186687	soft_tissue
SRR8615719	44	RNA-Seq	GCA_000001405.13	202	14224442464	DSMZ:LCLC-97TM1	PRJNA523380	SAMN10988572	Human	6719274209	LCLC-97TM1	BROAD INSTITUTE	public	bam,sra	gs,s3,ncbi	ncbi.public,gs.US,s3.us-east-1	carcinoma (large_cell_carcinoma)	primary	Caucasian	SRX5414681	Illumina HiSeq 2500	cell line	RNASeq-LCLC97TM1_LUNG	PAIRED	cDNA	TRANSCRIPTOMIC	Homo sapiens	ILLUMINA	2019-03-27T00:00:00Z	LCLC97TM1_LUNG	cell culture	male	SRP186687	lung
SRR8615723	44	RNA-Seq	GCA_000001405.13	202	17353450340	ATCC:U-87 MG	PRJNA523380	SAMN10988360	Human	8674271521	U-87 MG	BROAD INSTITUTE	public	bam,sra	s3,gs,ncbi	ncbi.public,s3.us-east-1,gs.US	glioma (astrocytoma)	primary	Caucasian	SRX5414677	Illumina HiSeq 2500	cell line	RNASeq-U87MG_CENTRAL_NERVOUS_SYSTEM	PAIRED	cDNA	TRANSCRIPTOMIC	Homo sapiens	ILLUMINA	2019-03-27T00:00:00Z	U87MG_CENTRAL_NERVOUS_SYSTEM	cell culture	female	SRP186687	central_nervous_system
SRR8615725	NA	RNA-Seq	GCA_000001405.13	202	12107404694	NA	PRJNA523380	SAMN10989628	Human	5561356753	TTC642	BROAD INSTITUTE	public	bam,sra	gs,s3,ncbi	gs.US,ncbi.public,s3.us-east-1	NA	NA	NA	SRX5414675	Illumina HiSeq 2500	cell line	RNASeq-TTC642_SOFT_TISSUE	PAIRED	cDNA	TRANSCRIPTOMIC	Homo sapiens	ILLUMINA	2019-03-27T00:00:00Z	TTC642_SOFT_TISSUE	cell culture	NA	SRP186687	soft_tissue
SRR8615726	77	RNA-Seq	GCA_000001405.13	202	17678866886	NIBRI	PRJNA523380	SAMN10988442	Human	8729307045	TT	BROAD INSTITUTE	public	bam,sra	gs,ncbi,s3	s3.us-east-1,gs.US,ncbi.public	carcinoma (medullary_carcinoma)	primary	Caucasian	SRX5414674	Illumina HiSeq 2500	cell line	RNASeq-TT_THYROID	PAIRED	cDNA	TRANSCRIPTOMIC	Homo sapiens	ILLUMINA	2019-03-27T00:00:00Z	TT_THYROID	cell culture	female	SRP186687	thyroid
SRR8615728	57	RNA-Seq	GCA_000001405.13	202	12248841458	DSMZ:TT2609-C02	PRJNA523380	SAMN10989561	Human	5809421825	TT2609-C02	BROAD INSTITUTE	public	bam,sra	gs,ncbi,s3	ncbi.public,gs.US,s3.us-east-1	carcinoma (follicular_carcinoma)	primary	Caucasian	SRX5414672	Illumina HiSeq 2500	cell line	RNASeq-TT2609C02_THYROID	PAIRED	cDNA	TRANSCRIPTOMIC	Homo sapiens	ILLUMINA	2019-03-27T00:00:00Z	TT2609C02_THYROID	cell culture	male	SRP186687	thyroid
SRR8615730	NA	RNA-Seq	GCA_000001405.13	202	11239544014	NA	PRJNA523380	SAMN10989627	Human	5131285269	TTC549	BROAD INSTITUTE	public	sra,bam	ncbi,gs,s3	gs.US,s3.us-east-1,ncbi.public	NA	NA	NA	SRX5414670	Illumina HiSeq 2500	cell line	RNASeq-TTC549_SOFT_TISSUE	PAIRED	cDNA	TRANSCRIPTOMIC	Homo sapiens	ILLUMINA	2019-03-27T00:00:00Z	TTC549_SOFT_TISSUE	cell culture	NA	SRP186687	soft_tissue
SRR8615733	NA	RNA-Seq	GCA_000001405.13	202	18753898362	GNF	PRJNA523380	SAMN10987813	Human	9499096392	GCIY	BROAD INSTITUTE	public	sra,bam	ncbi,s3,gs	ncbi.public,s3.us-east-1,gs.US	carcinoma (adenocarcinoma)	primary	Asian	SRX5414667	Illumina HiSeq 2500	cell line	RNASeq-GCIY_STOMACH	PAIRED	cDNA	TRANSCRIPTOMIC	Homo sapiens	ILLUMINA	2019-03-27T00:00:00Z	GCIY_STOMACH	cell culture	female	SRP186687	stomach
SRR8615734	51	RNA-Seq	GCA_000001405.13	202	16336956242	NIBRI	PRJNA523380	SAMN10988029	Human	8221161106	OVMANA	BROAD INSTITUTE	public	sra,bam	s3,gs,ncbi	s3.us-east-1,ncbi.public,gs.US	carcinoma (clear_cell_carcinoma)	primary	Asian	SRX5414666	Illumina HiSeq 2500	cell line	RNASeq-OVMANA_OVARY	PAIRED	cDNA	TRANSCRIPTOMIC	Homo sapiens	ILLUMINA	2019-03-27T00:00:00Z	OVMANA_OVARY	cell culture	female	SRP186687	ovary
SRR8615735	66	RNA-Seq	GCA_000001405.13	202	19414410486	HSRRB	PRJNA523380	SAMN10987784	Human	9611254439	FU97	BROAD INSTITUTE	public	sra,bam	ncbi,gs,s3	ncbi.public,gs.US,s3.us-east-1	carcinoma (diffuse_adenocarcinoma)	primary	Asian	SRX5414665	Illumina HiSeq 2500	cell line	RNASeq-FU97_STOMACH	PAIRED	cDNA	TRANSCRIPTOMIC	Homo sapiens	ILLUMINA	2019-03-27T00:00:00Z	FU97_STOMACH	cell culture	female	SRP186687	stomach
SRR8615737	9	RNA-Seq	GCA_000001405.13	202	22625587114	NA	PRJNA523380	SAMN10988164	Human	12641710977	G-292\, clone A141B1	BROAD INSTITUTE	public	sra,bam	ncbi,gs,s3	ncbi.public,gs.US,s3.us-east-1	osteosarcoma	primary	Caucasian	SRX5414663	Illumina HiSeq 2500	cell line	RNASeq-G292CLONEA141B1_BONE	PAIRED	cDNA	TRANSCRIPTOMIC	Homo sapiens	ILLUMINA	2019-03-27T00:00:00Z	G292CLONEA141B1_BONE	cell culture	female	SRP186687	bone
SRR8615738	31	RNA-Seq	GCA_000001405.13	202	18694911130	ATCC:G-361	PRJNA523380	SAMN10988270	Human	9319885393	G-361	BROAD INSTITUTE	public	sra,bam	s3,gs,ncbi	ncbi.public,s3.us-east-1,gs.US	malignant_melanoma	primary	Caucasian	SRX5414662	Illumina HiSeq 2500	cell line	RNASeq-G361_SKIN	PAIRED	cDNA	TRANSCRIPTOMIC	Homo sapiens	ILLUMINA	2019-03-27T00:00:00Z	G361_SKIN	cell culture	male	SRP186687	skin
SRR8615739	0.25	RNA-Seq	GCA_000001405.13	202	16398421004	NIBRI	PRJNA523380	SAMN10987919	Human	8161486218	G-401	BROAD INSTITUTE	public	bam,sra	s3,ncbi,gs	s3.us-east-1,ncbi.public,gs.US	rhabdoid_tumour	primary	Caucasian	SRX5414661	Illumina HiSeq 2500	cell line	RNASeq-G401_SOFT_TISSUE	PAIRED	cDNA	TRANSCRIPTOMIC	Homo sapiens	ILLUMINA	2019-03-27T00:00:00Z	G401_SOFT_TISSUE	cell culture	male	SRP186687	soft_tissue
SRR8615740	0.75	RNA-Seq	GCA_000001405.13	202	22127536924	NA	PRJNA523380	SAMN10988323	Human	12404387427	G-402	BROAD INSTITUTE	public	bam,sra	ncbi,gs,s3	gs.US,ncbi.public,s3.us-east-1	rhabdoid_tumour	primary	Caucasian	SRX5414660	Illumina HiSeq 2500	cell line	RNASeq-G402_SOFT_TISSUE	PAIRED	cDNA	TRANSCRIPTOMIC	Homo sapiens	ILLUMINA	2019-03-27T00:00:00Z	G402_SOFT_TISSUE	cell culture	female	SRP186687	soft_tissue
SRR8615743	65	RNA-Seq	GCA_000001405.13	202	19887490244	NIBRI	PRJNA523380	SAMN10987787	Human	10729256482	RL95-2	BROAD INSTITUTE	public	sra,bam	s3,ncbi,gs	gs.US,s3.us-east-1,ncbi.public	carcinoma (mixed_adenosquamous_carcinoma)	primary	Caucasian	SRX5414657	Illumina HiSeq 2500	cell line	RNASeq-RL952_ENDOMETRIUM	PAIRED	cDNA	TRANSCRIPTOMIC	Homo sapiens	ILLUMINA	2019-03-27T00:00:00Z	RL952_ENDOMETRIUM	cell culture	female	SRP186687	endometrium
SRR8615745	67	RNA-Seq	GCA_000001405.13	202	18498858616	GNF	PRJNA523380	SAMN10987772	Human	9216631489	SF-295	BROAD INSTITUTE	public	sra,bam	ncbi,s3,gs	gs.US,s3.us-east-1,ncbi.public	glioma (astrocytoma_Grade_IV\, glioblastoma_multiforme)	primary	Caucasian	SRX5414655	Illumina HiSeq 2500	cell line	RNASeq-SF295_CENTRAL_NERVOUS_SYSTEM	PAIRED	cDNA	TRANSCRIPTOMIC	Homo sapiens	ILLUMINA	2019-03-27T00:00:00Z	SF295_CENTRAL_NERVOUS_SYSTEM	cell culture	female	SRP186687	central_nervous_system
SRR8615746	NA	RNA-Seq	GCA_000001405.13	202	21511993434	Garraway Lab	PRJNA523380	SAMN10989591	Human	11562912701	SF268	BROAD INSTITUTE	public	sra,bam	ncbi,s3,gs	gs.US,ncbi.public,s3.us-east-1	glioma	primary	Caucasian	SRX5414654	Illumina HiSeq 2500	cell line	RNASeq-SF268_CENTRAL_NERVOUS_SYSTEM	PAIRED	cDNA	TRANSCRIPTOMIC	Homo sapiens	ILLUMINA	2019-03-27T00:00:00Z	SF268_CENTRAL_NERVOUS_SYSTEM	cell culture	NA	SRP186687	central_nervous_system
SRR8615747	52	RNA-Seq	GCA_000001405.13	202	15250313806	NA	PRJNA523380	SAMN10988269	Human	7643251430	RL	BROAD INSTITUTE	public	bam,sra	ncbi,gs,s3	gs.US,ncbi.public,s3.us-east-1	lymphoid_neoplasm (B_cell_lymphoma_unspecified)	metastasis	Caucasian	SRX5414653	Illumina HiSeq 2500	cell line	RNASeq-RL_HAEMATOPOIETIC_AND_LYMPHOID_TISSUE	PAIRED	cDNA	TRANSCRIPTOMIC	Homo sapiens	ILLUMINA	2019-03-27T00:00:00Z	RL_HAEMATOPOIETIC_AND_LYMPHOID_TISSUE	cell culture	male	SRP186687	haematopoietic_and_lymphoid_tissue
SRR8615749	71	RNA-Seq	GCA_000001405.13	202	16634809888	NA	PRJNA523380	SAMN10988088	Human	8348928424	Set-2	BROAD INSTITUTE	public	sra,bam	gs,s3,ncbi	gs.US,ncbi.public,s3.us-east-1	haematopoietic_neoplasm (essential_thrombocythaemia)	primary	Asian	SRX5414651	Illumina HiSeq 2500	cell line	RNASeq-SET2_HAEMATOPOIETIC_AND_LYMPHOID_TISSUE	PAIRED	cDNA	TRANSCRIPTOMIC	Homo sapiens	ILLUMINA	2019-03-27T00:00:00Z	SET2_HAEMATOPOIETIC_AND_LYMPHOID_TISSUE	cell culture	female	SRP186687	haematopoietic_and_lymphoid_tissue
SRR8615750	5	RNA-Seq	GCA_000001405.13	202	15466654796	DSMZ:SEM	PRJNA523380	SAMN10988273	Human	7736944005	SEM	BROAD INSTITUTE	public	sra,bam	gs,s3,ncbi	gs.US,ncbi.public,s3.us-east-1	lymphoid_neoplasm (acute_lymphoblastic_B_cell_leukaemia)	primary	Caucasian	SRX5414650	Illumina HiSeq 2500	cell line	RNASeq-SEM_HAEMATOPOIETIC_AND_LYMPHOID_TISSUE	PAIRED	cDNA	TRANSCRIPTOMIC	Homo sapiens	ILLUMINA	2019-03-27T00:00:00Z	SEM_HAEMATOPOIETIC_AND_LYMPHOID_TISSUE	cell culture	female	SRP186687	haematopoietic_and_lymphoid_tissue
SRR8615751	NA	RNA-Seq	GCA_000001405.13	202	18409470788	NA	PRJNA523380	SAMN10988399	Human	9851762895	SF-172	BROAD INSTITUTE	public	sra,bam	s3,ncbi,gs	ncbi.public,gs.US,s3.us-east-1	glioma (astrocytoma_Grade_IV\, glioblastoma_multiforme)	NA	NA	SRX5414649	Illumina HiSeq 2500	cell line	RNASeq-SF172_CENTRAL_NERVOUS_SYSTEM	PAIRED	cDNA	TRANSCRIPTOMIC	Homo sapiens	ILLUMINA	2019-03-27T00:00:00Z	SF172_CENTRAL_NERVOUS_SYSTEM	cell culture	female	SRP186687	central_nervous_system
SRR8615752	NA	RNA-Seq	GCA_000001405.13	202	16066374414	HSSRB	PRJNA523380	SAMN10987624	Human	8038330473	SF126	BROAD INSTITUTE	public	bam,sra	ncbi,s3,gs	gs.US,ncbi.public,s3.us-east-1	glioma (astrocytoma)	primary	Caucasian	SRX5414648	Illumina HiSeq 2500	cell line	RNASeq-SF126_CENTRAL_NERVOUS_SYSTEM	PAIRED	cDNA	TRANSCRIPTOMIC	Homo sapiens	ILLUMINA	2019-03-27T00:00:00Z	SF126_CENTRAL_NERVOUS_SYSTEM	cell culture	NA	SRP186687	central_nervous_system
SRR8615756	44	RNA-Seq	GCA_000001405.13	202	16654851520	ATCC:MDA-MB-157	PRJNA523380	SAMN10988196	Human	7833034742	MDA-MB-157	BROAD INSTITUTE	public	bam,sra	s3,gs,ncbi	s3.us-east-1,gs.US,ncbi.public	carcinoma (ductal_carcinoma\, medullary)	metastasis	African_american	SRX5414644	Illumina HiSeq 2500	cell line	RNASeq-MDAMB157_BREAST	PAIRED	cDNA	TRANSCRIPTOMIC	Homo sapiens	ILLUMINA	2019-03-27T00:00:00Z	MDAMB157_BREAST	cell culture	female	SRP186687	breast
SRR8615758	69	RNA-Seq	GCA_000001405.13	202	17882091410	ATCC:MCF7	PRJNA523380	SAMN10988179	Human	8914272659	MCF7	BROAD INSTITUTE	public	bam,sra	s3,ncbi,gs	s3.us-east-1,gs.US,ncbi.public	carcinoma	metastasis	Caucasian	SRX5414642	Illumina HiSeq 2500	cell line	RNASeq-MCF7_BREAST	PAIRED	cDNA	TRANSCRIPTOMIC	Homo sapiens	ILLUMINA	2019-03-27T00:00:00Z	MCF7_BREAST	cell culture	female	SRP186687	breast
SRR8615760	NA	RNA-Seq	GCA_000001405.13	202	14085610288	ATCC:MC116	PRJNA523380	SAMN10987876	Human	6677865035	MC116	BROAD INSTITUTE	public	sra,bam	ncbi,gs,s3	s3.us-east-1,ncbi.public,gs.US	lymphoid_neoplasm (B_cell_lymphoma_unspecified)	metastasis	Caucasian	SRX5414640	Illumina HiSeq 2500	cell line	RNASeq-MC116_HAEMATOPOIETIC_AND_LYMPHOID_TISSUE	PAIRED	cDNA	TRANSCRIPTOMIC	Homo sapiens	ILLUMINA	2019-03-27T00:00:00Z	MC116_HAEMATOPOIETIC_AND_LYMPHOID_TISSUE	cell culture	male	SRP186687	haematopoietic_and_lymphoid_tissue
SRR8615762	0.5	RNA-Seq	GCA_000001405.13	202	14563799030	DSMZ:M-07e	PRJNA523380	SAMN10988568	Human	6833733469	M-07e	BROAD INSTITUTE	public	bam,sra	ncbi,s3,gs	s3.us-east-1,gs.US,ncbi.public	haematopoietic_neoplasm (acute_myeloid_leukaemia\, M7)	primary	Caucasian	SRX5414638	Illumina HiSeq 2500	cell line	RNASeq-M07E_HAEMATOPOIETIC_AND_LYMPHOID_TISSUE	PAIRED	cDNA	TRANSCRIPTOMIC	Homo sapiens	ILLUMINA	2019-03-27T00:00:00Z	M07E_HAEMATOPOIETIC_AND_LYMPHOID_TISSUE	cell culture	female	SRP186687	haematopoietic_and_lymphoid_tissue
SRR8615763	72	RNA-Seq	GCA_000001405.13	202	17262950704	NIBRI	PRJNA523380	SAMN10988195	Human	8374919084	SW 1353	BROAD INSTITUTE	public	bam,sra	gs,ncbi,s3	s3.us-east-1,ncbi.public,gs.US	chondrosarcoma	primary	Caucasian	SRX5414637	Illumina HiSeq 2500	cell line	RNASeq-SW1353_BONE	PAIRED	cDNA	TRANSCRIPTOMIC	Homo sapiens	ILLUMINA	2019-03-27T00:00:00Z	SW1353_BONE	cell culture	female	SRP186687	bone
SRR8615764	41	RNA-Seq	GCA_000001405.13	202	14922985936	ATCC:NCI-H1930	PRJNA523380	SAMN10988154	Human	7457406131	NCI-H1930	BROAD INSTITUTE	public	sra,bam	s3,ncbi,gs	ncbi.public,s3.us-east-1,gs.US	carcinoma (small_cell_carcinoma)	metastasis	Caucasian	SRX5414636	Illumina HiSeq 2500	cell line	RNASeq-NCIH1930_LUNG	PAIRED	cDNA	TRANSCRIPTOMIC	Homo sapiens	ILLUMINA	2019-03-27T00:00:00Z	NCIH1930_LUNG	cell culture	male	SRP186687	lung
SRR8615765	70	RNA-Seq	GCA_000001405.13	202	21917999496	ATCC:Panc 04.03	PRJNA523380	SAMN10988264	Human	11538815991	Panc 04.03	BROAD INSTITUTE	public	sra,bam	s3,gs,ncbi	ncbi.public,gs.US,s3.us-east-1	carcinoma	primary	Caucasian	SRX5414635	Illumina HiSeq 2500	cell line	RNASeq-PANC0403_PANCREAS	PAIRED	cDNA	TRANSCRIPTOMIC	Homo sapiens	ILLUMINA	2019-03-27T00:00:00Z	PANC0403_PANCREAS	cell culture	male	SRP186687	pancreas
SRR8615767	51	RNA-Seq	GCA_000001405.13	202	13725938784	ATCC:MDA-MB-231	PRJNA523380	SAMN10987764	Human	6487084397	MDA-MB-231	BROAD INSTITUTE	public	sra,bam	s3,ncbi,gs	ncbi.public,s3.us-east-1,gs.US	carcinoma	metastasis	Caucasian	SRX5414633	Illumina HiSeq 2500	cell line	RNASeq-MDAMB231_BREAST	PAIRED	cDNA	TRANSCRIPTOMIC	Homo sapiens	ILLUMINA	2019-03-27T00:00:00Z	MDAMB231_BREAST	cell culture	female	SRP186687	breast
SRR8615768	51	RNA-Seq	GCA_000001405.13	202	17732536064	DSMZ:BFTC-905	PRJNA523380	SAMN10988546	Human	10022329712	BFTC-905	BROAD INSTITUTE	public	sra,bam	ncbi,gs,s3	gs.US,s3.us-east-1,ncbi.public	carcinoma (transitional_cell_carcinoma\, papillary_transitional_cell_carcinoma)	primary	Asian	SRX5414632	Illumina HiSeq 2500	cell line	RNASeq-BFTC905_URINARY_TRACT	PAIRED	cDNA	TRANSCRIPTOMIC	Homo sapiens	ILLUMINA	2019-03-27T00:00:00Z	BFTC905_URINARY_TRACT	cell culture	female	SRP186687	urinary_tract
SRR8615770	NA	RNA-Seq	GCA_000001405.13	202	19359589504	NIBRI	PRJNA523380	SAMN10988332	Human	9642293276	BDCM	BROAD INSTITUTE	public	sra,bam	ncbi,gs,s3	ncbi.public,s3.us-east-1,gs.US	lymphoid_neoplasm (acute_lymphoblastic_B_cell_leukaemia)	primary	Caucasian	SRX5414630	Illumina HiSeq 2500	cell line	RNASeq-BDCM_HAEMATOPOIETIC_AND_LYMPHOID_TISSUE	PAIRED	cDNA	TRANSCRIPTOMIC	Homo sapiens	ILLUMINA	2019-03-27T00:00:00Z	BDCM_HAEMATOPOIETIC_AND_LYMPHOID_TISSUE	cell culture	male	SRP186687	haematopoietic_and_lymphoid_tissue
SRR8615771	71	RNA-Seq	GCA_000001405.13	202	25697689368	DSMZ:BEN	PRJNA523380	SAMN10988541	Human	14426392145	BEN	BROAD INSTITUTE	public	bam,sra	gs,ncbi,s3	ncbi.public,gs.US,s3.us-east-1	carcinoma	metastasis	Caucasian	SRX5414629	Illumina HiSeq 2500	cell line	RNASeq-BEN_LUNG	PAIRED	cDNA	TRANSCRIPTOMIC	Homo sapiens	ILLUMINA	2019-03-27T00:00:00Z	BEN_LUNG	cell culture	male	SRP186687	lung
SRR8615772	92	RNA-Seq	GCA_000001405.13	202	24467318882	ATCC:BCP-1	PRJNA523380	SAMN10987880	Human	13741113346	BCP-1	BROAD INSTITUTE	public	sra,bam	gs,s3,ncbi	ncbi.public,gs.US,s3.us-east-1	lymphoid_neoplasm (B_cell_lymphoma_unspecified)	primary	Caucasian	SRX5414628	Illumina HiSeq 2500	cell line	RNASeq-BCP1_HAEMATOPOIETIC_AND_LYMPHOID_TISSUE	PAIRED	cDNA	TRANSCRIPTOMIC	Homo sapiens	ILLUMINA	2019-03-27T00:00:00Z	BCP1_HAEMATOPOIETIC_AND_LYMPHOID_TISSUE	cell culture	male	SRP186687	haematopoietic_and_lymphoid_tissue
SRR8615773	76	RNA-Seq	GCA_000001405.13	202	21065381736	DSMZ:B-CPAP	PRJNA523380	SAMN10989558	Human	11686449920	B-CPAP	BROAD INSTITUTE	public	bam,sra	gs,ncbi,s3	s3.us-east-1,gs.US,ncbi.public	carcinoma (papillary_carcinoma)	primary	Caucasian	SRX5414627	Illumina HiSeq 2500	cell line	RNASeq-BCPAP_THYROID	PAIRED	cDNA	TRANSCRIPTOMIC	Homo sapiens	ILLUMINA	2019-03-27T00:00:00Z	BCPAP_THYROID	cell culture	female	SRP186687	thyroid
SRR8615775	82	RNA-Seq	GCA_000001405.13	202	16094146384	DSMZ:BC-3C	PRJNA523380	SAMN10988581	Human	8059905269	BC-3C	BROAD INSTITUTE	public	sra,bam	ncbi,s3,gs	ncbi.public,s3.us-east-1,gs.US	carcinoma (transitional_cell_carcinoma)	primary	Caucasian	SRX5414625	Illumina HiSeq 2500	cell line	RNASeq-BC3C_URINARY_TRACT	PAIRED	cDNA	TRANSCRIPTOMIC	Homo sapiens	ILLUMINA	2019-03-27T00:00:00Z	BC3C_URINARY_TRACT	cell culture	female	SRP186687	urinary_tract
SRR8615778	26	RNA-Seq	GCA_000001405.13	202	21350920250	ATCC:Hs 695T	PRJNA523380	SAMN10988229	Human	10506624719	Hs 695T	BROAD INSTITUTE	public	bam,sra	gs,s3,ncbi	gs.US,s3.us-east-1,ncbi.public	malignant_melanoma	metastasis	Caucasian	SRX5414622	Illumina HiSeq 2500	cell line	RNASeq-HS695T_SKIN	PAIRED	cDNA	TRANSCRIPTOMIC	Homo sapiens	ILLUMINA	2019-03-27T00:00:00Z	HS695T_SKIN	cell culture	male	SRP186687	skin
SRR8615781	74	RNA-Seq	GCA_000001405.13	202	17286507742	NIBRI	PRJNA523380	SAMN10988177	Human	8498429004	Hs 729	BROAD INSTITUTE	public	bam,sra	gs,ncbi,s3	s3.us-east-1,ncbi.public,gs.US	rhabdomyosarcoma	primary	Caucasian	SRX5414619	Illumina HiSeq 2500	cell line	RNASeq-HS729_SOFT_TISSUE	PAIRED	cDNA	TRANSCRIPTOMIC	Homo sapiens	ILLUMINA	2019-03-27T00:00:00Z	HS729_SOFT_TISSUE	cell culture	male	SRP186687	soft_tissue
SRR8615784	76	RNA-Seq	GCA_000001405.13	202	21117113734	NIBRI	PRJNA523380	SAMN10988175	Human	11233374025	Hs 683	BROAD INSTITUTE	public	bam,sra	ncbi,s3,gs	ncbi.public,gs.US,s3.us-east-1	glioma	primary	Caucasian	SRX5414616	Illumina HiSeq 2500	cell line	RNASeq-HS683_CENTRAL_NERVOUS_SYSTEM	PAIRED	cDNA	TRANSCRIPTOMIC	Homo sapiens	ILLUMINA	2019-03-27T00:00:00Z	HS683_CENTRAL_NERVOUS_SYSTEM	cell culture	male	SRP186687	central_nervous_system
SRR8615786	62	RNA-Seq	GCA_000001405.13	202	23104055020	ECACC:COLO 792	PRJNA523380	SAMN10987972	Human	12915220005	COLO 792	BROAD INSTITUTE	public	bam,sra	ncbi,s3,gs	ncbi.public,gs.US,s3.us-east-1	malignant_melanoma	metastasis	Caucasian	SRX5414614	Illumina HiSeq 2500	cell line	RNASeq-COLO792_SKIN	PAIRED	cDNA	TRANSCRIPTOMIC	Homo sapiens	ILLUMINA	2019-03-27T00:00:00Z	COLO792_SKIN	cell culture	male	SRP186687	skin
SRR8615787	48	RNA-Seq	GCA_000001405.13	202	17699300802	DSMZ:COLO-783	PRJNA523380	SAMN10987968	Human	9386841261	COLO-783	BROAD INSTITUTE	public	bam,sra	s3,gs,ncbi	ncbi.public,gs.US,s3.us-east-1	malignant_melanoma	metastasis	Caucasian	SRX5414613	Illumina HiSeq 2500	cell line	RNASeq-COLO783_SKIN	PAIRED	cDNA	TRANSCRIPTOMIC	Homo sapiens	ILLUMINA	2019-03-27T00:00:00Z	COLO783_SKIN	cell culture	female	SRP186687	skin
SRR8615789	63	RNA-Seq	GCA_000001405.13	202	23705391850	ECACC:COLO 684	PRJNA523380	SAMN10988054	Human	13376239838	COLO 684	BROAD INSTITUTE	public	bam,sra	s3,gs,ncbi	gs.US,s3.us-east-1,ncbi.public	carcinoma (adenocarcinoma)	primary	Caucasian	SRX5414611	Illumina HiSeq 2500	cell line	RNASeq-COLO684_ENDOMETRIUM	PAIRED	cDNA	TRANSCRIPTOMIC	Homo sapiens	ILLUMINA	2019-03-27T00:00:00Z	COLO684_ENDOMETRIUM	cell culture	female	SRP186687	endometrium
SRR8615790	10	RNA-Seq	GCA_000001405.13	202	16351204918	ATCC:Hs 737.T	PRJNA523380	SAMN10988166	Human	8046208577	Hs 737.T	BROAD INSTITUTE	public	sra,bam	gs,s3,ncbi	gs.US,ncbi.public,s3.us-east-1	giant_cell_tumour	primary	Caucasian	SRX5414610	Illumina HiSeq 2500	cell line	RNASeq-HS737T_FIBROBLAST	PAIRED	cDNA	TRANSCRIPTOMIC	Homo sapiens	ILLUMINA	2019-03-27T00:00:00Z	HS737T_FIBROBLAST	cell culture	female	SRP186687	bone
SRR8615791	52	RNA-Seq	GCA_000001405.13	202	16304084378	NA	PRJNA523380	SAMN10987649	Human	7998718036	Hs 739.T	BROAD INSTITUTE	public	sra,bam	ncbi,s3,gs	gs.US,s3.us-east-1,ncbi.public	carcinoma	primary	Asian	SRX5414609	Illumina HiSeq 2500	cell line	RNASeq-HS739T_FIBROBLAST	PAIRED	cDNA	TRANSCRIPTOMIC	Homo sapiens	ILLUMINA	2019-03-27T00:00:00Z	HS739T_FIBROBLAST	cell culture	female	SRP186687	breast
SRR8615792	69	RNA-Seq	GCA_000001405.13	202	22946544712	DSMZ:COLO-678	PRJNA523380	SAMN10988483	Human	12888450683	COLO-678	BROAD INSTITUTE	public	sra,bam	ncbi,s3,gs	gs.US,s3.us-east-1,ncbi.public	carcinoma (adenocarcinoma)	metastasis	Caucasian	SRX5414608	Illumina HiSeq 2500	cell line	RNASeq-COLO678_LARGE_INTESTINE	PAIRED	cDNA	TRANSCRIPTOMIC	Homo sapiens	ILLUMINA	2019-03-27T00:00:00Z	COLO678_LARGE_INTESTINE	cell culture	male	SRP186687	large_intestine
SRR8615793	47	RNA-Seq	GCA_000001405.13	202	17310847732	ECACC:COLO 668	PRJNA523380	SAMN10987711	Human	8546858686	COLO 668	BROAD INSTITUTE	public	sra,bam	gs,s3,ncbi	s3.us-east-1,ncbi.public,gs.US	carcinoma (small_cell_carcinoma)	metastasis	Caucasian	SRX5414607	Illumina HiSeq 2500	cell line	RNASeq-COLO668_LUNG	PAIRED	cDNA	TRANSCRIPTOMIC	Homo sapiens	ILLUMINA	2019-03-27T00:00:00Z	COLO668_LUNG	cell culture	female	SRP186687	lung
SRR8615795	64	RNA-Seq	GCA_000001405.13	202	21660737952	DSMZ:PA-TU-8988S	PRJNA523380	SAMN10987622	Human	11432077043	PA-TU-8988S	BROAD INSTITUTE	public	bam,sra	gs,ncbi,s3	ncbi.public,s3.us-east-1,gs.US	carcinoma (ductal_carcinoma)	metastasis	Caucasian	SRX5414605	Illumina HiSeq 2500	cell line	RNASeq-PATU8988S_PANCREAS	PAIRED	cDNA	TRANSCRIPTOMIC	Homo sapiens	ILLUMINA	2019-03-27T00:00:00Z	PATU8988S_PANCREAS	cell culture	female	SRP186687	pancreas
SRR8615796	45	RNA-Seq	GCA_000001405.13	202	23868168298	ATCC:NCI-H2085	PRJNA523380	SAMN10987638	Human	12606523155	NCI-H2085	BROAD INSTITUTE	public	bam,sra	gs,s3,ncbi	ncbi.public,s3.us-east-1,gs.US	carcinoma (adenocarcinoma)	primary	Caucasian	SRX5414604	Illumina HiSeq 2500	cell line	RNASeq-NCIH2085_LUNG	PAIRED	cDNA	TRANSCRIPTOMIC	Homo sapiens	ILLUMINA	2019-03-27T00:00:00Z	NCIH2085_LUNG	cell culture	male	SRP186687	lung
SRR8615801	57	RNA-Seq	GCA_000001405.13	202	22262570288	DSMZ:RI-1	PRJNA523380	SAMN10988505	Human	11975548463	RI-1	BROAD INSTITUTE	public	sra,bam	ncbi,gs,s3	gs.US,s3.us-east-1,ncbi.public	lymphoid_neoplasm (B_cell_lymphoma_unspecified)	primary	Caucasian	SRX5414599	Illumina HiSeq 2500	cell line	RNASeq-RI1_HAEMATOPOIETIC_AND_LYMPHOID_TISSUE	PAIRED	cDNA	TRANSCRIPTOMIC	Homo sapiens	ILLUMINA	2019-03-27T00:00:00Z	RI1_HAEMATOPOIETIC_AND_LYMPHOID_TISSUE	cell culture	female	SRP186687	haematopoietic_and_lymphoid_tissue
SRR8615803	NA	RNA-Seq	GCA_000001405.13	202	14164284238	ATCC:RKO	PRJNA523380	SAMN10988176	Human	7133259421	RKO	BROAD INSTITUTE	public	bam,sra	ncbi,gs,s3	s3.us-east-1,ncbi.public,gs.US	carcinoma (adenocarcinoma)	primary	African_american	SRX5414597	Illumina HiSeq 2500	cell line	RNASeq-RKO_LARGE_INTESTINE	PAIRED	cDNA	TRANSCRIPTOMIC	Homo sapiens	ILLUMINA	2019-03-27T00:00:00Z	RKO_LARGE_INTESTINE	cell culture	NA	SRP186687	large_intestine
SRR8615806	NA	RNA-Seq	GCA_000001405.13	202	25027325906	NIBRI	PRJNA523380	SAMN10988059	Human	13208338284	NCI-H3255	BROAD INSTITUTE	public	sra,bam	ncbi,s3,gs	ncbi.public,gs.US,s3.us-east-1	carcinoma (adenocarcinoma)	primary	Caucasian	SRX5414594	Illumina HiSeq 2500	cell line	RNASeq-NCIH3255_LUNG	PAIRED	cDNA	TRANSCRIPTOMIC	Homo sapiens	ILLUMINA	2019-03-27T00:00:00Z	NCIH3255_LUNG	cell culture	NA	SRP186687	lung
SRR8615807	52	RNA-Seq	GCA_000001405.13	202	19208553902	EACC	PRJNA523380	SAMN10987678	Human	10130050682	NCI-H322	BROAD INSTITUTE	public	bam,sra	s3,gs,ncbi	ncbi.public,s3.us-east-1,gs.US	carcinoma (adenocarcinoma)	primary	Caucasian	SRX5414593	Illumina HiSeq 2500	cell line	RNASeq-NCIH322_LUNG	PAIRED	cDNA	TRANSCRIPTOMIC	Homo sapiens	ILLUMINA	2019-03-27T00:00:00Z	NCIH322_LUNG	cell culture	male	SRP186687	lung
SRR8615808	56	RNA-Seq	GCA_000001405.13	202	18710990128	ATCC:NCI-H510	PRJNA523380	SAMN10987639	Human	9253349831	NCI-H510	BROAD INSTITUTE	public	bam,sra	s3,ncbi,gs	gs.US,ncbi.public,s3.us-east-1	carcinoma (small_cell_carcinoma)	primary	Caucasian	SRX5414592	Illumina HiSeq 2500	cell line	RNASeq-NCIH510_LUNG	PAIRED	cDNA	TRANSCRIPTOMIC	Homo sapiens	ILLUMINA	2019-03-27T00:00:00Z	NCIH510_LUNG	cell culture	male	SRP186687	lung
SRR8615809	55	RNA-Seq	GCA_000001405.13	202	18753583848	NIBRI	PRJNA523380	SAMN10987662	Human	10063491205	NCI-H508	BROAD INSTITUTE	public	bam,sra	gs,ncbi,s3	gs.US,ncbi.public,s3.us-east-1	carcinoma (adenocarcinoma)	metastasis	Caucasian	SRX5414591	Illumina HiSeq 2500	cell line	RNASeq-NCIH508_LARGE_INTESTINE	PAIRED	cDNA	TRANSCRIPTOMIC	Homo sapiens	ILLUMINA	2019-03-27T00:00:00Z	NCIH508_LARGE_INTESTINE	cell culture	male	SRP186687	large_intestine
SRR8615810	NA	RNA-Seq	GCA_000001405.13	202	21292542856	ATCC:NCI-H460	PRJNA523380	SAMN10987808	Human	10623711676	NCI-H460	BROAD INSTITUTE	public	bam,sra	gs,ncbi,s3	gs.US,s3.us-east-1,ncbi.public	carcinoma (large_cell_carcinoma)	metastasis	Caucasian	SRX5414590	Illumina HiSeq 2500	cell line	RNASeq-NCIH460_LUNG	PAIRED	cDNA	TRANSCRIPTOMIC	Homo sapiens	ILLUMINA	2019-03-27T00:00:00Z	NCIH460_LUNG	cell culture	male	SRP186687	lung
SRR8615812	54	RNA-Seq	GCA_000001405.13	202	16861816074	ATCC:T-47D	PRJNA523380	SAMN10987684	Human	8493194918	T-47D	BROAD INSTITUTE	public	sra,bam	ncbi,s3,gs	ncbi.public,s3.us-east-1,gs.US	carcinoma (ductal_carcinoma)	metastasis	Caucasian	SRX5414588	Illumina HiSeq 2500	cell line	RNASeq-T47D_BREAST	PAIRED	cDNA	TRANSCRIPTOMIC	Homo sapiens	ILLUMINA	2019-03-27T00:00:00Z	T47D_BREAST	cell culture	female	SRP186687	breast
SRR8615813	46	RNA-Seq	GCA_000001405.13	202	14630743648	ATCC:NCI-H2122	PRJNA523380	SAMN10988248	Human	7322854856	NCI-H2122	BROAD INSTITUTE	public	bam,sra	gs,s3,ncbi	s3.us-east-1,gs.US,ncbi.public	carcinoma (adenocarcinoma)	metastasis	Caucasian	SRX5414587	Illumina HiSeq 2500	cell line	RNASeq-NCIH2122_LUNG	PAIRED	cDNA	TRANSCRIPTOMIC	Homo sapiens	ILLUMINA	2019-03-27T00:00:00Z	NCIH2122_LUNG	cell culture	female	SRP186687	lung
SRR8615817	41	RNA-Seq	GCA_000001405.13	202	19182213506	ATCC:HCC1187	PRJNA523380	SAMN10987946	Human	10225112317	HCC1187	BROAD INSTITUTE	public	sra,bam	gs,s3,ncbi	s3.us-east-1,gs.US,ncbi.public	carcinoma (ductal_carcinoma)	primary	Caucasian	SRX5414583	Illumina HiSeq 2500	cell line	RNASeq-HCC1187_BREAST	PAIRED	cDNA	TRANSCRIPTOMIC	Homo sapiens	ILLUMINA	2019-03-27T00:00:00Z	HCC1187_BREAST	cell culture	female	SRP186687	breast
SRR8615818	58	RNA-Seq	GCA_000001405.13	202	22623510958	KCLB:HCC-1171	PRJNA523380	SAMN10987756	Human	12675631214	HCC-1171	BROAD INSTITUTE	public	sra,bam	s3,gs,ncbi	ncbi.public,gs.US,s3.us-east-1	carcinoma (non_small_cell_carcinoma)	primary	Caucasian	SRX5414582	Illumina HiSeq 2500	cell line	RNASeq-HCC1171_LUNG	PAIRED	cDNA	TRANSCRIPTOMIC	Homo sapiens	ILLUMINA	2019-03-27T00:00:00Z	HCC1171_LUNG	cell culture	male	SRP186687	lung
SRR8615820	57	RNA-Seq	GCA_000001405.13	202	13830347938	HSRRB	PRJNA523380	SAMN10987873	Human	6980173274	HARA	BROAD INSTITUTE	public	bam,sra	gs,ncbi,s3	s3.us-east-1,gs.US,ncbi.public	carcinoma (squamous_cell_carcinoma)	metastasis	Asian	SRX5414580	Illumina HiSeq 2500	cell line	RNASeq-HARA_LUNG	PAIRED	cDNA	TRANSCRIPTOMIC	Homo sapiens	ILLUMINA	2019-03-27T00:00:00Z	HARA_LUNG	cell culture	male	SRP186687	lung
SRR8615822	43	RNA-Seq	GCA_000001405.13	202	17200548056	ATCC:HCC1395	PRJNA523380	SAMN10987926	Human	9077021207	HCC1395	BROAD INSTITUTE	public	bam,sra	ncbi,s3,gs	gs.US,s3.us-east-1,ncbi.public	carcinoma (ductal_carcinoma)	primary	Caucasian	SRX5414578	Illumina HiSeq 2500	cell line	RNASeq-HCC1395_BREAST	PAIRED	cDNA	TRANSCRIPTOMIC	Homo sapiens	ILLUMINA	2019-03-27T00:00:00Z	HCC1395_BREAST	cell culture	female	SRP186687	breast
SRR8615825	68	RNA-Seq	GCA_000001405.13	202	13058467760	HSRRB	PRJNA523380	SAMN10988353	Human	6282562597	TCC-PAN2	BROAD INSTITUTE	public	sra,bam	ncbi,s3,gs	ncbi.public,s3.us-east-1,gs.US	carcinoma	primary	Asian	SRX5414575	Illumina HiSeq 2500	cell line	RNASeq-TCCPAN2_PANCREAS	PAIRED	cDNA	TRANSCRIPTOMIC	Homo sapiens	ILLUMINA	2019-03-27T00:00:00Z	TCCPAN2_PANCREAS	cell culture	female	SRP186687	pancreas
SRR8615826	67	RNA-Seq	GCA_000001405.13	202	14362084254	NIBRI	PRJNA523380	SAMN10988046	Human	7198678187	TCCSUP	BROAD INSTITUTE	public	bam,sra	ncbi,s3,gs	s3.us-east-1,ncbi.public,gs.US	carcinoma (transitional_cell_carcinoma)	primary	Caucasian	SRX5414574	Illumina HiSeq 2500	cell line	RNASeq-TCCSUP_URINARY_TRACT	PAIRED	cDNA	TRANSCRIPTOMIC	Homo sapiens	ILLUMINA	2019-03-27T00:00:00Z	TCCSUP_URINARY_TRACT	cell culture	female	SRP186687	urinary_tract
SRR8615827	NA	RNA-Seq	GCA_000001405.13	202	20132106790	RIKEN:TE-10	PRJNA523380	SAMN10987688	Human	9559038027	TE-10	BROAD INSTITUTE	public	sra,bam	gs,ncbi,s3	gs.US,s3.us-east-1,ncbi.public	carcinoma (squamous_cell_carcinoma)	primary	Asian	SRX5414573	Illumina HiSeq 2500	cell line	RNASeq-TE10_OESOPHAGUS	PAIRED	cDNA	TRANSCRIPTOMIC	Homo sapiens	ILLUMINA	2019-03-27T00:00:00Z	TE10_OESOPHAGUS	cell culture	NA	SRP186687	oesophagus
SRR8615828	58	RNA-Seq	GCA_000001405.13	202	19428949638	GNF	PRJNA523380	SAMN10988291	Human	9735995726	TE-11	BROAD INSTITUTE	public	bam,sra	gs,s3,ncbi	ncbi.public,s3.us-east-1,gs.US	carcinoma (squamous_cell_carcinoma)	primary	Asian	SRX5414572	Illumina HiSeq 2500	cell line	RNASeq-TE11_OESOPHAGUS	PAIRED	cDNA	TRANSCRIPTOMIC	Homo sapiens	ILLUMINA	2019-03-27T00:00:00Z	TE11_OESOPHAGUS	cell culture	NA	SRP186687	oesophagus
SRR8615829	72	RNA-Seq	GCA_000001405.13	202	28152950888	NIBRI	PRJNA523380	SAMN10988370	Human	14164118813	T84	BROAD INSTITUTE	public	bam,sra	gs,s3,ncbi	gs.US,ncbi.public,s3.us-east-1	carcinoma (adenocarcinoma)	metastasis	Caucasian	SRX5414571	Illumina HiSeq 2500	cell line	RNASeq-T84_LARGE_INTESTINE	PAIRED	cDNA	TRANSCRIPTOMIC	Homo sapiens	ILLUMINA	2019-03-27T00:00:00Z	T84_LARGE_INTESTINE	cell culture	male	SRP186687	large_intestine
SRR8615833	1	RNA-Seq	GCA_000001405.13	202	9128145680	ATCC:TE 125.T	PRJNA523380	SAMN10988446	Human	4293196689	TE 125.T	BROAD INSTITUTE	public	sra,bam	s3,ncbi,gs	s3.us-east-1,gs.US,ncbi.public	rhabdomyosarcoma	primary	Caucasian	SRX5414567	Illumina HiSeq 2500	cell line	RNASeq-TE125T_FIBROBLAST	PAIRED	cDNA	TRANSCRIPTOMIC	Homo sapiens	ILLUMINA	2019-03-27T00:00:00Z	TE125T_FIBROBLAST	cell culture	female	SRP186687	soft_tissue
SRR8615834	NA	RNA-Seq	GCA_000001405.13	202	11175096722	RIKEN:TE-14	PRJNA523380	SAMN10987745	Human	5306696144	TE-14	BROAD INSTITUTE	public	sra,bam	s3,ncbi,gs	gs.US,s3.us-east-1,ncbi.public	carcinoma (squamous_cell_carcinoma)	primary	Asian	SRX5414566	Illumina HiSeq 2500	cell line	RNASeq-TE14_OESOPHAGUS	PAIRED	cDNA	TRANSCRIPTOMIC	Homo sapiens	ILLUMINA	2019-03-27T00:00:00Z	TE14_OESOPHAGUS	cell culture	NA	SRP186687	oesophagus
SRR8615836	60	RNA-Seq	GCA_000001405.13	202	18947728674	NIBRI	PRJNA523380	SAMN10987619	Human	10129932150	LN-229	BROAD INSTITUTE	public	bam,sra	gs,s3,ncbi	gs.US,ncbi.public,s3.us-east-1	glioma (astrocytoma_Grade_IV\, glioblastoma_multiforme)	primary	Caucasian	SRX5414564	Illumina HiSeq 2500	cell line	RNASeq-LN229_CENTRAL_NERVOUS_SYSTEM	PAIRED	cDNA	TRANSCRIPTOMIC	Homo sapiens	ILLUMINA	2019-03-27T00:00:00Z	LN229_CENTRAL_NERVOUS_SYSTEM	cell culture	female	SRP186687	central_nervous_system
SRR8615838	65	RNA-Seq	GCA_000001405.13	202	14554747410	ATCC:LN-18	PRJNA523380	SAMN10988197	Human	6883023914	LN-18	BROAD INSTITUTE	public	bam,sra	gs,s3,ncbi	ncbi.public,s3.us-east-1,gs.US	glioma (astrocytoma_Grade_IV\, glioblastoma_multiforme)	primary	Caucasian	SRX5414562	Illumina HiSeq 2500	cell line	RNASeq-LN18_CENTRAL_NERVOUS_SYSTEM	PAIRED	cDNA	TRANSCRIPTOMIC	Homo sapiens	ILLUMINA	2019-03-27T00:00:00Z	LN18_CENTRAL_NERVOUS_SYSTEM	cell culture	male	SRP186687	central_nervous_system
SRR8615839	NA	RNA-Seq	GCA_000001405.13	202	14417484774	RIKEN:LMSU	PRJNA523380	SAMN10987709	Human	6794414579	LMSU	BROAD INSTITUTE	public	bam,sra	ncbi,gs,s3	gs.US,s3.us-east-1,ncbi.public	carcinoma (adenocarcinoma)	metastasis	Asian	SRX5414561	Illumina HiSeq 2500	cell line	RNASeq-LMSU_STOMACH	PAIRED	cDNA	TRANSCRIPTOMIC	Homo sapiens	ILLUMINA	2019-03-27T00:00:00Z	LMSU_STOMACH	cell culture	NA	SRP186687	stomach
SRR8615840	NA	RNA-Seq	GCA_000001405.13	202	13432543682	RIKEN:LK-2	PRJNA523380	SAMN10988232	Human	7099326439	LK-2	BROAD INSTITUTE	public	bam,sra	s3,ncbi,gs	ncbi.public,gs.US,s3.us-east-1	carcinoma (squamous_cell_carcinoma)	primary	Asian	SRX5414560	Illumina HiSeq 2500	cell line	RNASeq-LK2_LUNG	PAIRED	cDNA	TRANSCRIPTOMIC	Homo sapiens	ILLUMINA	2019-03-27T00:00:00Z	LK2_LUNG	cell culture	NA	SRP186687	lung
SRR8615841	63	RNA-Seq	GCA_000001405.13	202	17714982466	HSRRB	PRJNA523380	SAMN10988365	Human	8887758411	IM95	BROAD INSTITUTE	public	sra,bam	gs,ncbi,s3	gs.US,s3.us-east-1,ncbi.public	carcinoma (intestinal_adenocarcinoma)	primary	Asian	SRX5414559	Illumina HiSeq 2500	cell line	RNASeq-IM95_STOMACH	PAIRED	cDNA	TRANSCRIPTOMIC	Homo sapiens	ILLUMINA	2019-03-27T00:00:00Z	IM95_STOMACH	cell culture	male	SRP186687	stomach
SRR8615843	26	RNA-Seq	GCA_000001405.13	202	17859998670	DSMZ:IGR-39	PRJNA523380	SAMN10988096	Human	8199521183	IGR-39	BROAD INSTITUTE	public	bam,sra	s3,ncbi,gs	gs.US,ncbi.public,s3.us-east-1	malignant_melanoma	primary	Caucasian	SRX5414557	Illumina HiSeq 2500	cell line	RNASeq-IGR39_SKIN	PAIRED	cDNA	TRANSCRIPTOMIC	Homo sapiens	ILLUMINA	2019-03-27T00:00:00Z	IGR39_SKIN	cell culture	male	SRP186687	skin
SRR8615845	42	RNA-Seq	GCA_000001405.13	202	15543376214	NA	PRJNA523380	SAMN10987998	Human	7644779226	IGR-1	BROAD INSTITUTE	public	bam,sra	gs,ncbi,s3	gs.US,ncbi.public,s3.us-east-1	malignant_melanoma	metastasis	Caucasian	SRX5414555	Illumina HiSeq 2500	cell line	RNASeq-IGR1_SKIN	PAIRED	cDNA	TRANSCRIPTOMIC	Homo sapiens	ILLUMINA	2019-03-27T00:00:00Z	IGR1_SKIN	cell culture	male	SRP186687	skin
SRR8615848	68	RNA-Seq	GCA_000001405.13	202	19202940524	RIKEN:IA-LM	PRJNA523380	SAMN10987936	Human	9600226230	IA-LM	BROAD INSTITUTE	public	bam,sra	gs,ncbi,s3	gs.US,ncbi.public,s3.us-east-1	carcinoma (large_cell_carcinoma)	metastasis	Asian	SRX5414552	Illumina HiSeq 2500	cell line	RNASeq-IALM_LUNG	PAIRED	cDNA	TRANSCRIPTOMIC	Homo sapiens	ILLUMINA	2019-03-27T00:00:00Z	IALM_LUNG	cell culture	male	SRP186687	lung
SRR8615849	26	RNA-Seq	GCA_000001405.13	202	16625457692	ATCC:HuT 102	PRJNA523380	SAMN10987657	Human	8192109983	HuT 102	BROAD INSTITUTE	public	sra,bam	gs,ncbi,s3	ncbi.public,gs.US,s3.us-east-1	lymphoid_neoplasm (mycosis_fungoides-Sezary_syndrome)	primary	African_american	SRX5414551	Illumina HiSeq 2500	cell line	RNASeq-HUT102_HAEMATOPOIETIC_AND_LYMPHOID_TISSUE	PAIRED	cDNA	TRANSCRIPTOMIC	Homo sapiens	ILLUMINA	2019-03-27T00:00:00Z	HUT102_HAEMATOPOIETIC_AND_LYMPHOID_TISSUE	cell culture	male	SRP186687	haematopoietic_and_lymphoid_tissue
SRR8615851	NA	RNA-Seq	GCA_000001405.13	202	19369435186	NA	PRJNA523380	SAMN10988407	Human	10356092143	SLR 26	BROAD INSTITUTE	public	bam,sra	ncbi,s3,gs	ncbi.public,s3.us-east-1,gs.US	carcinoma (renal_cell_carcinoma)	primary	Caucasian	SRX5414549	Illumina HiSeq 2500	cell line	RNASeq-SLR26_KIDNEY	PAIRED	cDNA	TRANSCRIPTOMIC	Homo sapiens	ILLUMINA	2019-03-27T00:00:00Z	SLR26_KIDNEY	cell culture	NA	SRP186687	kidney
SRR8615855	NA	RNA-Seq	GCA_000001405.13	202	14132557714	ATCC:T1-73	PRJNA523380	SAMN10987677	Human	6795473918	T1-73	BROAD INSTITUTE	public	sra,bam	s3,ncbi,gs	gs.US,ncbi.public,s3.us-east-1	osteosarcoma	primary	Caucasian	SRX5414545	Illumina HiSeq 2500	cell line	RNASeq-T173_FIBROBLAST	PAIRED	cDNA	TRANSCRIPTOMIC	Homo sapiens	ILLUMINA	2019-03-27T00:00:00Z	T173_FIBROBLAST	cell culture	NA	SRP186687	bone
SRR8615856	81	RNA-Seq	GCA_000001405.13	202	14697942786	NIBRI	PRJNA523380	SAMN10988334	Human	7420084865	SW948	BROAD INSTITUTE	public	bam,sra	s3,ncbi,gs	ncbi.public,gs.US,s3.us-east-1	carcinoma (adenocarcinoma)	primary	Caucasian	SRX5414544	Illumina HiSeq 2500	cell line	RNASeq-SW948_LARGE_INTESTINE	PAIRED	cDNA	TRANSCRIPTOMIC	Homo sapiens	ILLUMINA	2019-03-27T00:00:00Z	SW948_LARGE_INTESTINE	cell culture	female	SRP186687	large_intestine
SRR8615857	40	RNA-Seq	GCA_000001405.13	202	13673886616	GNF	PRJNA523380	SAMN10988110	Human	6572354279	T3M-10	BROAD INSTITUTE	public	bam,sra	ncbi,gs,s3	s3.us-east-1,ncbi.public,gs.US	carcinoma (large_cell_carcinoma)	primary	Asian	SRX5414543	Illumina HiSeq 2500	cell line	RNASeq-T3M10_LUNG	PAIRED	cDNA	TRANSCRIPTOMIC	Homo sapiens	ILLUMINA	2019-03-27T00:00:00Z	T3M10_LUNG	cell culture	male	SRP186687	lung
SRR8615859	NA	RNA-Seq	GCA_000001405.13	202	10924750446	NA	PRJNA523380	SAMN10989621	Human	5012630781	SKPNDW	BROAD INSTITUTE	public	bam,sra	s3,gs,ncbi	gs.US,s3.us-east-1,ncbi.public	NA	NA	NA	SRX5414541	Illumina HiSeq 2500	cell line	RNASeq-SKPNDW_BONE	PAIRED	cDNA	TRANSCRIPTOMIC	Homo sapiens	ILLUMINA	2019-03-27T00:00:00Z	SKPNDW_BONE	cell culture	NA	SRP186687	bone
SRR8615862	NA	RNA-Seq	GCA_000001405.13	202	17092682884	NA	PRJNA523380	SAMN10988419	Human	9138491858	SLR 20	BROAD INSTITUTE	public	bam,sra	s3,gs,ncbi	s3.us-east-1,gs.US,ncbi.public	carcinoma (renal_cell_carcinoma)	primary	Caucasian	SRX5414538	Illumina HiSeq 2500	cell line	RNASeq-SLR20_KIDNEY	PAIRED	cDNA	TRANSCRIPTOMIC	Homo sapiens	ILLUMINA	2019-03-27T00:00:00Z	SLR20_KIDNEY	cell culture	NA	SRP186687	kidney
SRR8615863	NA	RNA-Seq	GCA_000001405.13	202	18155608298	NA	PRJNA523380	SAMN10988415	Human	9736232470	SLR 21	BROAD INSTITUTE	public	bam,sra	ncbi,gs,s3	s3.us-east-1,gs.US,ncbi.public	carcinoma (renal_cell_carcinoma)	primary	Caucasian	SRX5414537	Illumina HiSeq 2500	cell line	RNASeq-SLR21_KIDNEY	PAIRED	cDNA	TRANSCRIPTOMIC	Homo sapiens	ILLUMINA	2019-03-27T00:00:00Z	SLR21_KIDNEY	cell culture	NA	SRP186687	kidney
SRR8615864	NA	RNA-Seq	GCA_000001405.13	202	15431422966	NA	PRJNA523380	SAMN10988389	Human	8282065602	SLR 23	BROAD INSTITUTE	public	bam,sra	ncbi,s3,gs	ncbi.public,s3.us-east-1,gs.US	carcinoma (renal_cell_carcinoma)	primary	Caucasian	SRX5414536	Illumina HiSeq 2500	cell line	RNASeq-SLR23_KIDNEY	PAIRED	cDNA	TRANSCRIPTOMIC	Homo sapiens	ILLUMINA	2019-03-27T00:00:00Z	SLR23_KIDNEY	cell culture	NA	SRP186687	kidney
SRR8615865	NA	RNA-Seq	GCA_000001405.13	202	16810644626	NA	PRJNA523380	SAMN10988394	Human	8990402306	SLR 24	BROAD INSTITUTE	public	bam,sra	ncbi,gs,s3	gs.US,ncbi.public,s3.us-east-1	carcinoma (renal_cell_carcinoma)	primary	Caucasian	SRX5414535	Illumina HiSeq 2500	cell line	RNASeq-SLR24_KIDNEY	PAIRED	cDNA	TRANSCRIPTOMIC	Homo sapiens	ILLUMINA	2019-03-27T00:00:00Z	SLR24_KIDNEY	cell culture	NA	SRP186687	kidney
SRR8615868	42	RNA-Seq	GCA_000001405.13	202	19429357072	ECACC:FTC-238	PRJNA523380	SAMN10987981	Human	10866746130	FTC-238	BROAD INSTITUTE	public	sra,bam	ncbi,s3,gs	s3.us-east-1,ncbi.public,gs.US	carcinoma (follicular_carcinoma)	metastasis	Caucasian	SRX5415181	Illumina HiSeq 2500	cell line	RNASeq-FTC238_THYROID	PAIRED	cDNA	TRANSCRIPTOMIC	Homo sapiens	ILLUMINA	2019-03-27T00:00:00Z	FTC238_THYROID	cell culture	male	SRP186687	thyroid
SRR8615870	42	RNA-Seq	GCA_000001405.13	202	16682074858	NIBRI	PRJNA523380	SAMN10987768	Human	8366072901	OVCAR-4	BROAD INSTITUTE	public	sra,bam	ncbi,gs,s3	s3.us-east-1,gs.US,ncbi.public	carcinoma	primary	Caucasian	SRX5415179	Illumina HiSeq 2500	cell line	RNASeq-OVCAR4_OVARY	PAIRED	cDNA	TRANSCRIPTOMIC	Homo sapiens	ILLUMINA	2019-03-27T00:00:00Z	OVCAR4_OVARY	cell culture	female	SRP186687	ovary
SRR8615872	NA	RNA-Seq	GCA_000001405.13	202	16908765116	NA	PRJNA523380	SAMN10988413	Human	9027213320	LN382	BROAD INSTITUTE	public	sra,bam	s3,gs,ncbi	s3.us-east-1,ncbi.public,gs.US	glioma (astrocytoma_Grade_IV)	NA	Caucasian	SRX5414857	Illumina HiSeq 2500	cell line	RNASeq-LN382_CENTRAL_NERVOUS_SYSTEM	PAIRED	cDNA	TRANSCRIPTOMIC	Homo sapiens	ILLUMINA	2019-03-27T00:00:00Z	LN382_CENTRAL_NERVOUS_SYSTEM	cell culture	male	SRP186687	central_nervous_system
SRR8615875	NA	RNA-Seq	GCA_000001405.13	202	21725599546	HSSRB	PRJNA523380	SAMN10987626	Human	11461915259	OUMS-23	BROAD INSTITUTE	public	sra,bam	s3,gs,ncbi	gs.US,ncbi.public,s3.us-east-1	carcinoma (adenocarcinoma)	primary	Asian	SRX5415175	Illumina HiSeq 2500	cell line	RNASeq-OUMS23_LARGE_INTESTINE	PAIRED	cDNA	TRANSCRIPTOMIC	Homo sapiens	ILLUMINA	2019-03-27T00:00:00Z	OUMS23_LARGE_INTESTINE	cell culture	NA	SRP186687	large_intestine
SRR8615876	46	RNA-Seq	GCA_000001405.13	202	21288728086	ECACC:OV56	PRJNA523380	SAMN10987613	Human	11189454192	OV56	BROAD INSTITUTE	public	sra,bam	gs,ncbi,s3	ncbi.public,gs.US,s3.us-east-1	carcinoma	primary	Caucasian	SRX5415174	Illumina HiSeq 2500	cell line	RNASeq-OV56_OVARY	PAIRED	cDNA	TRANSCRIPTOMIC	Homo sapiens	ILLUMINA	2019-03-27T00:00:00Z	OV56_OVARY	cell culture	female	SRP186687	ovary
SRR8615878	NA	RNA-Seq	GCA_000001405.13	202	19190500556	RIKEN:OS-RC-2	PRJNA523380	SAMN10987712	Human	10061962245	OS-RC-2	BROAD INSTITUTE	public	bam,sra	gs,s3,ncbi	ncbi.public,gs.US,s3.us-east-1	carcinoma (renal_cell_carcinoma)	primary	Asian	SRX5415172	Illumina HiSeq 2500	cell line	RNASeq-OSRC2_KIDNEY	PAIRED	cDNA	TRANSCRIPTOMIC	Homo sapiens	ILLUMINA	2019-03-27T00:00:00Z	OSRC2_KIDNEY	cell culture	male	SRP186687	kidney
SRR8615879	40	RNA-Seq	GCA_000001405.13	202	21781515570	HSSRB	PRJNA523380	SAMN10988266	Human	10919222014	OVISE	BROAD INSTITUTE	public	bam,sra	s3,gs,ncbi	s3.us-east-1,gs.US,ncbi.public	carcinoma (clear_cell_carcinoma)	metastasis	Asian	SRX5415171	Illumina HiSeq 2500	cell line	RNASeq-OVISE_OVARY	PAIRED	cDNA	TRANSCRIPTOMIC	Homo sapiens	ILLUMINA	2019-03-27T00:00:00Z	OVISE_OVARY	cell culture	female	SRP186687	ovary
SRR8615881	5	RNA-Seq	GCA_000001405.13	202	16257917076	ATCC:Hs 863.T	PRJNA523380	SAMN10988535	Human	7949510722	Hs 863.T	BROAD INSTITUTE	public	sra,bam	s3,ncbi,gs	ncbi.public,s3.us-east-1,gs.US	Ewings_sarcoma-peripheral_primitive_neuroectodermal_tumour	primary	Caucasian	SRX5415169	Illumina HiSeq 2500	cell line	RNASeq-HS863T_FIBROBLAST	PAIRED	cDNA	TRANSCRIPTOMIC	Homo sapiens	ILLUMINA	2019-03-27T00:00:00Z	HS863T_FIBROBLAST	cell culture	female	SRP186687	bone
SRR8615882	NA	RNA-Seq	GCA_000001405.13	202	16296863080	NA	PRJNA523380	SAMN10988521	Human	7997668344	Hs 852.T	BROAD INSTITUTE	public	bam,sra	s3,ncbi,gs	ncbi.public,gs.US,s3.us-east-1	malignant_melanoma	primary	Asian	SRX5415168	Illumina HiSeq 2500	cell line	RNASeq-HS852T_SKIN	PAIRED	cDNA	TRANSCRIPTOMIC	Homo sapiens	ILLUMINA	2019-03-27T00:00:00Z	HS852T_SKIN	cell culture	NA	SRP186687	skin
SRR8615883	20	RNA-Seq	GCA_000001405.13	202	18987127562	GNF	PRJNA523380	SAMN10988554	Human	9476038477	Hs 888.T	BROAD INSTITUTE	public	sra,bam	ncbi,s3,gs	s3.us-east-1,ncbi.public,gs.US	osteosarcoma	metastasis	Caucasian	SRX5415167	Illumina HiSeq 2500	cell line	RNASeq-HS888T_FIBROBLAST	PAIRED	cDNA	TRANSCRIPTOMIC	Homo sapiens	ILLUMINA	2019-03-27T00:00:00Z	HS888T_FIBROBLAST	cell culture	male	SRP186687	bone
SRR8615886	48	RNA-Seq	GCA_000001405.13	202	17122392236	NIBRI	PRJNA523380	SAMN10987618	Human	8358767663	Hs 895.T	BROAD INSTITUTE	public	bam,sra	ncbi,gs,s3	ncbi.public,gs.US,s3.us-east-1	malignant_melanoma	metastasis	Caucasian	SRX5415164	Illumina HiSeq 2500	cell line	RNASeq-HS895T_FIBROBLAST	PAIRED	cDNA	TRANSCRIPTOMIC	Homo sapiens	ILLUMINA	2019-03-27T00:00:00Z	HS895T_FIBROBLAST	cell culture	female	SRP186687	skin
SRR8615890	57	RNA-Seq	GCA_000001405.13	202	19498643678	GNF	PRJNA523380	SAMN10987631	Human	9602774582	Hs 940.T	BROAD INSTITUTE	public	sra,bam	gs,ncbi,s3	ncbi.public,s3.us-east-1,gs.US	malignant_melanoma	primary	Caucasian	SRX5415160	Illumina HiSeq 2500	cell line	RNASeq-HS940T_FIBROBLAST	PAIRED	cDNA	TRANSCRIPTOMIC	Homo sapiens	ILLUMINA	2019-03-27T00:00:00Z	HS940T_FIBROBLAST	cell culture	male	SRP186687	skin
SRR8615891	48	RNA-Seq	GCA_000001405.13	202	18686207354	NIBRI	PRJNA523380	SAMN10987607	Human	9170535691	HCC2157	BROAD INSTITUTE	public	bam,sra	s3,gs,ncbi	s3.us-east-1,ncbi.public,gs.US	carcinoma (ductal_carcinoma)	primary	African_american	SRX5415159	Illumina HiSeq 2500	cell line	RNASeq-HCC2157_BREAST	PAIRED	cDNA	TRANSCRIPTOMIC	Homo sapiens	ILLUMINA	2019-03-27T00:00:00Z	HCC2157_BREAST	cell culture	female	SRP186687	breast
SRR8615892	59	RNA-Seq	GCA_000001405.13	202	17120776640	GNF	PRJNA523380	SAMN10988339	Human	8564392961	SW579	BROAD INSTITUTE	public	bam,sra	s3,ncbi,gs	s3.us-east-1,ncbi.public,gs.US	carcinoma (anaplastic_carcinoma)	primary	Caucasian	SRX5415158	Illumina HiSeq 2500	cell line	RNASeq-SW579_THYROID	PAIRED	cDNA	TRANSCRIPTOMIC	Homo sapiens	ILLUMINA	2019-03-27T00:00:00Z	SW579_THYROID	cell culture	male	SRP186687	thyroid
SRR8615893	65	RNA-Seq	GCA_000001405.13	202	15529647486	ATCC:DMS 79	PRJNA523380	SAMN10988337	Human	7753202683	DMS 79	BROAD INSTITUTE	public	sra,bam	ncbi,gs,s3	s3.us-east-1,gs.US,ncbi.public	carcinoma (small_cell_carcinoma)	primary	Caucasian	SRX5415157	Illumina HiSeq 2500	cell line	RNASeq-DMS79_LUNG	PAIRED	cDNA	TRANSCRIPTOMIC	Homo sapiens	ILLUMINA	2019-03-27T00:00:00Z	DMS79_LUNG	cell culture	NA	SRP186687	lung
SRR8615895	NA	RNA-Seq	GCA_000001405.13	202	19029582710	NIBRI	PRJNA523380	SAMN10988265	Human	9522127491	TYK-nu	BROAD INSTITUTE	public	sra,bam	s3,gs,ncbi	gs.US,ncbi.public,s3.us-east-1	carcinoma (undifferentiated_carcinoma)	primary	Asian	SRX5415155	Illumina HiSeq 2500	cell line	RNASeq-TYKNU_OVARY	PAIRED	cDNA	TRANSCRIPTOMIC	Homo sapiens	ILLUMINA	2019-03-27T00:00:00Z	TYKNU_OVARY	cell culture	female	SRP186687	ovary
SRR8615896	53	RNA-Seq	GCA_000001405.13	202	11308265828	ATCC:U266B1	PRJNA523380	SAMN10987866	Human	5400383139	U266B1	BROAD INSTITUTE	public	sra,bam	gs,ncbi,s3	ncbi.public,s3.us-east-1,gs.US	lymphoid_neoplasm (plasma_cell_myeloma)	primary	Caucasian	SRX5415154	Illumina HiSeq 2500	cell line	RNASeq-U266B1_HAEMATOPOIETIC_AND_LYMPHOID_TISSUE	PAIRED	cDNA	TRANSCRIPTOMIC	Homo sapiens	ILLUMINA	2019-03-27T00:00:00Z	U266B1_HAEMATOPOIETIC_AND_LYMPHOID_TISSUE	cell culture	male	SRP186687	haematopoietic_and_lymphoid_tissue
SRR8615898	43	RNA-Seq	GCA_000001405.13	202	17638968250	ATCC:NCI-H1299	PRJNA523380	SAMN10988385	Human	8724032640	NCI-H1299	BROAD INSTITUTE	public	sra,bam	ncbi,s3,gs	s3.us-east-1,gs.US,ncbi.public	carcinoma (non_small_cell_carcinoma)	metastasis	Caucasian	SRX5415152	Illumina HiSeq 2500	cell line	RNASeq-NCIH1299_LUNG	PAIRED	cDNA	TRANSCRIPTOMIC	Homo sapiens	ILLUMINA	2019-03-27T00:00:00Z	NCIH1299_LUNG	cell culture	male	SRP186687	lung
SRR8615901	42	RNA-Seq	GCA_000001405.13	202	17007449186	ATCC:NCI-H1184	PRJNA523380	SAMN10987606	Human	8409716524	NCI-H1184	BROAD INSTITUTE	public	sra,bam	s3,ncbi,gs	s3.us-east-1,ncbi.public,gs.US	carcinoma (small_cell_carcinoma)	metastasis	Caucasian	SRX5415149	Illumina HiSeq 2500	cell line	RNASeq-NCIH1184_LUNG	PAIRED	cDNA	TRANSCRIPTOMIC	Homo sapiens	ILLUMINA	2019-03-27T00:00:00Z	NCIH1184_LUNG	cell culture	male	SRP186687	lung
SRR8615902	NA	RNA-Seq	GCA_000001405.13	202	16678920426	HSRRB	PRJNA523380	SAMN10988368	Human	7772578136	KMRC-1	BROAD INSTITUTE	public	sra,bam	gs,s3,ncbi	ncbi.public,s3.us-east-1,gs.US	carcinoma (clear_cell_renal_cell_carcinoma)	primary	Asian	SRX5415148	Illumina HiSeq 2500	cell line	RNASeq-KMRC1_KIDNEY	PAIRED	cDNA	TRANSCRIPTOMIC	Homo sapiens	ILLUMINA	2019-03-27T00:00:00Z	KMRC1_KIDNEY	cell culture	male	SRP186687	kidney
SRR8615903	62	RNA-Seq	GCA_000001405.13	202	14477043868	HSSRB	PRJNA523380	SAMN10987870	Human	6894329135	KMM-1	BROAD INSTITUTE	public	sra,bam	ncbi,s3,gs	s3.us-east-1,gs.US,ncbi.public	lymphoid_neoplasm (plasma_cell_myeloma)	primary	Asian	SRX5415147	Illumina HiSeq 2500	cell line	RNASeq-KMM1_HAEMATOPOIETIC_AND_LYMPHOID_TISSUE	PAIRED	cDNA	TRANSCRIPTOMIC	Homo sapiens	ILLUMINA	2019-03-27T00:00:00Z	KMM1_HAEMATOPOIETIC_AND_LYMPHOID_TISSUE	cell culture	male	SRP186687	haematopoietic_and_lymphoid_tissue
SRR8615906	NA	RNA-Seq	GCA_000001405.13	202	19949674126	NIBRI	PRJNA523380	SAMN10988369	Human	10513651837	KM12	BROAD INSTITUTE	public	bam,sra	s3,ncbi,gs	s3.us-east-1,gs.US,ncbi.public	carcinoma (adenocarcinoma)	primary	Caucasian	SRX5415144	Illumina HiSeq 2500	cell line	RNASeq-KM12_LARGE_INTESTINE	PAIRED	cDNA	TRANSCRIPTOMIC	Homo sapiens	ILLUMINA	2019-03-27T00:00:00Z	KM12_LARGE_INTESTINE	cell culture	NA	SRP186687	large_intestine
SRR8615907	64	RNA-Seq	GCA_000001405.13	202	14054376240	GNF	PRJNA523380	SAMN10987617	Human	6653962842	KLE	BROAD INSTITUTE	public	sra,bam	gs,s3,ncbi	ncbi.public,s3.us-east-1,gs.US	carcinoma (adenocarcinoma)	primary	Caucasian	SRX5415143	Illumina HiSeq 2500	cell line	RNASeq-KLE_ENDOMETRIUM	PAIRED	cDNA	TRANSCRIPTOMIC	Homo sapiens	ILLUMINA	2019-03-27T00:00:00Z	KLE_ENDOMETRIUM	cell culture	female	SRP186687	endometrium
SRR8615908	37	RNA-Seq	GCA_000001405.13	202	13884430812	NA	PRJNA523380	SAMN10988578	Human	6575737268	KM-H2	BROAD INSTITUTE	public	sra,bam	s3,ncbi,gs	s3.us-east-1,ncbi.public,gs.US	lymphoid_neoplasm (Hodgkin_lymphoma)	metastasis	Asian	SRX5415142	Illumina HiSeq 2500	cell line	RNASeq-KMH2_HAEMATOPOIETIC_AND_LYMPHOID_TISSUE	PAIRED	cDNA	TRANSCRIPTOMIC	Homo sapiens	ILLUMINA	2019-03-27T00:00:00Z	KMH2_HAEMATOPOIETIC_AND_LYMPHOID_TISSUE	cell culture	male	SRP186687	haematopoietic_and_lymphoid_tissue
SRR8615909	NA	RNA-Seq	GCA_000001405.13	202	14389635438	HSRRB	PRJNA523380	SAMN10987835	Human	6773910727	KMBC-2	BROAD INSTITUTE	public	sra,bam	s3,gs,ncbi	ncbi.public,s3.us-east-1,gs.US	carcinoma	primary	Asian	SRX5415141	Illumina HiSeq 2500	cell line	RNASeq-KMBC2_URINARY_TRACT	PAIRED	cDNA	TRANSCRIPTOMIC	Homo sapiens	ILLUMINA	2019-03-27T00:00:00Z	KMBC2_URINARY_TRACT	cell culture	NA	SRP186687	urinary_tract
SRR8615910	59	RNA-Seq	GCA_000001405.13	202	14037906574	ATCC:KG-1	PRJNA523380	SAMN10988135	Human	6628120234	KG-1	BROAD INSTITUTE	public	sra,bam	gs,ncbi,s3	gs.US,s3.us-east-1,ncbi.public	haematopoietic_neoplasm (acute_myeloid_leukaemia\, M6)	primary	African_american	SRX5415140	Illumina HiSeq 2500	cell line	RNASeq-KG1_HAEMATOPOIETIC_AND_LYMPHOID_TISSUE	PAIRED	cDNA	TRANSCRIPTOMIC	Homo sapiens	ILLUMINA	2019-03-27T00:00:00Z	KG1_HAEMATOPOIETIC_AND_LYMPHOID_TISSUE	cell culture	male	SRP186687	haematopoietic_and_lymphoid_tissue
SRR8615912	15	RNA-Seq	GCA_000001405.13	202	15105136810	HSSRB	PRJNA523380	SAMN10987838	Human	7118951065	Ki-JK	BROAD INSTITUTE	public	sra,bam	s3,gs,ncbi	s3.us-east-1,gs.US,ncbi.public	lymphoid_neoplasm (anaplastic_large_cell_lymphoma)	primary	Asian	SRX5415138	Illumina HiSeq 2500	cell line	RNASeq-KIJK_HAEMATOPOIETIC_AND_LYMPHOID_TISSUE	PAIRED	cDNA	TRANSCRIPTOMIC	Homo sapiens	ILLUMINA	2019-03-27T00:00:00Z	KIJK_HAEMATOPOIETIC_AND_LYMPHOID_TISSUE	cell culture	male	SRP186687	haematopoietic_and_lymphoid_tissue
SRR8615913	53	RNA-Seq	GCA_000001405.13	202	14371228794	HSSRB	PRJNA523380	SAMN10987831	Human	6949946618	KHM-1B	BROAD INSTITUTE	public	bam,sra	ncbi,gs,s3	gs.US,s3.us-east-1,ncbi.public	lymphoid_neoplasm (plasma_cell_myeloma)	primary	Asian	SRX5415137	Illumina HiSeq 2500	cell line	RNASeq-KHM1B_HAEMATOPOIETIC_AND_LYMPHOID_TISSUE	PAIRED	cDNA	TRANSCRIPTOMIC	Homo sapiens	ILLUMINA	2019-03-27T00:00:00Z	KHM1B_HAEMATOPOIETIC_AND_LYMPHOID_TISSUE	cell culture	male	SRP186687	haematopoietic_and_lymphoid_tissue
SRR8615918	57	RNA-Seq	GCA_000001405.13	202	15779139504	HSRRB	PRJNA523380	SAMN10988364	Human	7737722375	JHH-2	BROAD INSTITUTE	public	sra,bam	ncbi,gs,s3	ncbi.public,gs.US,s3.us-east-1	carcinoma (hepatocellular_carcinoma)	metastasis	Asian	SRX5415132	Illumina HiSeq 2500	cell line	RNASeq-JHH2_LIVER	PAIRED	cDNA	TRANSCRIPTOMIC	Homo sapiens	ILLUMINA	2019-03-27T00:00:00Z	JHH2_LIVER	cell culture	male	SRP186687	liver
SRR8615919	51	RNA-Seq	GCA_000001405.13	202	16677495316	HSRRB	PRJNA523380	SAMN10987774	Human	8191567043	JHH-4	BROAD INSTITUTE	public	bam,sra	s3,gs,ncbi	s3.us-east-1,gs.US,ncbi.public	carcinoma (hepatocellular_carcinoma)	primary	Asian	SRX5415131	Illumina HiSeq 2500	cell line	RNASeq-JHH4_LIVER	PAIRED	cDNA	TRANSCRIPTOMIC	Homo sapiens	ILLUMINA	2019-03-27T00:00:00Z	JHH4_LIVER	cell culture	male	SRP186687	liver
SRR8615920	50	RNA-Seq	GCA_000001405.13	202	14722742124	HSSRB	PRJNA523380	SAMN10987783	Human	6907049014	JHH-5	BROAD INSTITUTE	public	sra,bam	ncbi,gs,s3	ncbi.public,s3.us-east-1,gs.US	carcinoma (hepatocellular_carcinoma)	primary	Asian	SRX5415130	Illumina HiSeq 2500	cell line	RNASeq-JHH5_LIVER	PAIRED	cDNA	TRANSCRIPTOMIC	Homo sapiens	ILLUMINA	2019-03-27T00:00:00Z	JHH5_LIVER	cell culture	male	SRP186687	liver
SRR8615921	57	RNA-Seq	GCA_000001405.13	202	20310975972	HSRRB	PRJNA523380	SAMN10987997	Human	10289608667	JHH-6	BROAD INSTITUTE	public	sra,bam	gs,ncbi,s3	ncbi.public,s3.us-east-1,gs.US	carcinoma (hepatocellular_carcinoma)	primary	Asian	SRX5415129	Illumina HiSeq 2500	cell line	RNASeq-JHH6_LIVER	PAIRED	cDNA	TRANSCRIPTOMIC	Homo sapiens	ILLUMINA	2019-03-27T00:00:00Z	JHH6_LIVER	cell culture	female	SRP186687	liver
SRR8615922	45	RNA-Seq	GCA_000001405.13	202	18670860808	RIKEN:JHOS-2	PRJNA523380	SAMN10988178	Human	9206954215	JHOS-2	BROAD INSTITUTE	public	bam,sra	ncbi,s3,gs	s3.us-east-1,gs.US,ncbi.public	carcinoma (adenocarcinoma)	primary	Asian	SRX5415128	Illumina HiSeq 2500	cell line	RNASeq-JHOS2_OVARY	PAIRED	cDNA	TRANSCRIPTOMIC	Homo sapiens	ILLUMINA	2019-03-27T00:00:00Z	JHOS2_OVARY	cell culture	female	SRP186687	ovary
SRR8615923	44	RNA-Seq	GCA_000001405.13	202	17659164008	RIKEN:JHOS-4	PRJNA523380	SAMN10987614	Human	9240168617	JHOS-4	BROAD INSTITUTE	public	bam,sra	ncbi,gs,s3	ncbi.public,s3.us-east-1,gs.US	carcinoma (adenocarcinoma)	primary	Asian	SRX5415127	Illumina HiSeq 2500	cell line	RNASeq-JHOS4_OVARY	PAIRED	cDNA	TRANSCRIPTOMIC	Homo sapiens	ILLUMINA	2019-03-27T00:00:00Z	JHOS4_OVARY	cell culture	female	SRP186687	ovary
SRR8615924	73	RNA-Seq	GCA_000001405.13	202	12151943270	ATCC:SW1116	PRJNA523380	SAMN10987597	Human	5825474339	SW1116	BROAD INSTITUTE	public	bam,sra	gs,ncbi,s3	ncbi.public,s3.us-east-1,gs.US	carcinoma (adenocarcinoma)	primary	Caucasian	SRX5415126	Illumina HiSeq 2500	cell line	RNASeq-SW1116_LARGE_INTESTINE	PAIRED	cDNA	TRANSCRIPTOMIC	Homo sapiens	ILLUMINA	2019-03-27T00:00:00Z	SW1116_LARGE_INTESTINE	cell culture	male	SRP186687	large_intestine
SRR8615925	72	RNA-Seq	GCA_000001405.13	202	10315203326	NIBRI	PRJNA523380	SAMN10988151	Human	4886587110	SW 1088	BROAD INSTITUTE	public	sra,bam	gs,s3,ncbi	gs.US,ncbi.public,s3.us-east-1	glioma	primary	Caucasian	SRX5415125	Illumina HiSeq 2500	cell line	RNASeq-SW1088_CENTRAL_NERVOUS_SYSTEM	PAIRED	cDNA	TRANSCRIPTOMIC	Homo sapiens	ILLUMINA	2019-03-27T00:00:00Z	SW1088_CENTRAL_NERVOUS_SYSTEM	cell culture	male	SRP186687	central_nervous_system
SRR8615929	9	RNA-Seq	GCA_000001405.13	202	19581979586	NIBRI	PRJNA523380	SAMN10987666	Human	9669982342	SUP-B15	BROAD INSTITUTE	public	bam,sra	ncbi,s3,gs	ncbi.public,gs.US,s3.us-east-1	lymphoid_neoplasm (acute_lymphoblastic_B_cell_leukaemia)	primary	Caucasian	SRX5415121	Illumina HiSeq 2500	cell line	RNASeq-SUPB15_HAEMATOPOIETIC_AND_LYMPHOID_TISSUE	PAIRED	cDNA	TRANSCRIPTOMIC	Homo sapiens	ILLUMINA	2019-03-27T00:00:00Z	SUPB15_HAEMATOPOIETIC_AND_LYMPHOID_TISSUE	cell culture	male	SRP186687	haematopoietic_and_lymphoid_tissue
SRR8615930	58	RNA-Seq	GCA_000001405.13	202	15401045600	KCLB:SNU-201	PRJNA523380	SAMN10988069	Human	7731803629	SNU-201	BROAD INSTITUTE	public	bam,sra	ncbi,s3,gs	ncbi.public,s3.us-east-1,gs.US	glioma (astrocytoma_Grade_IV\, glioblastoma_multiforme)	primary	Asian	SRX5415120	Illumina HiSeq 2500	cell line	RNASeq-SNU201_CENTRAL_NERVOUS_SYSTEM	PAIRED	cDNA	TRANSCRIPTOMIC	Homo sapiens	ILLUMINA	2019-03-27T00:00:00Z	SNU201_CENTRAL_NERVOUS_SYSTEM	cell culture	male	SRP186687	central_nervous_system
SRR8615932	24	RNA-Seq	GCA_000001405.13	202	23048520978	NIBRI	PRJNA523380	SAMN10987895	Human	12411983059	SNU-182	BROAD INSTITUTE	public	bam,sra	ncbi,s3,gs	ncbi.public,gs.US,s3.us-east-1	carcinoma (hepatocellular_carcinoma)	primary	Asian	SRX5415118	Illumina HiSeq 2500	cell line	RNASeq-SNU182_LIVER	PAIRED	cDNA	TRANSCRIPTOMIC	Homo sapiens	ILLUMINA	2019-03-27T00:00:00Z	SNU182_LIVER	cell culture	male	SRP186687	liver
SRR8615933	44	RNA-Seq	GCA_000001405.13	202	21793342266	NIBRI	PRJNA523380	SAMN10988139	Human	10913487600	SNU-1	BROAD INSTITUTE	public	sra,bam	gs,s3,ncbi	s3.us-east-1,ncbi.public,gs.US	carcinoma (undifferentiated_adenocarcinoma)	metastasis	Asian	SRX5415117	Illumina HiSeq 2500	cell line	RNASeq-SNU1_STOMACH	PAIRED	cDNA	TRANSCRIPTOMIC	Homo sapiens	ILLUMINA	2019-03-27T00:00:00Z	SNU1_STOMACH	cell culture	male	SRP186687	stomach
SRR8615934	33	RNA-Seq	GCA_000001405.13	202	16863275120	NIBRI	PRJNA523380	SAMN10987911	Human	8481337341	SNU-16	BROAD INSTITUTE	public	sra,bam	ncbi,gs,s3	gs.US,ncbi.public,s3.us-east-1	carcinoma (undifferentiated_adenocarcinoma)	metastasis	Asian	SRX5415116	Illumina HiSeq 2500	cell line	RNASeq-SNU16_STOMACH	PAIRED	cDNA	TRANSCRIPTOMIC	Homo sapiens	ILLUMINA	2019-03-27T00:00:00Z	SNU16_STOMACH	cell culture	female	SRP186687	stomach
SRR8615936	55	RNA-Seq	GCA_000001405.13	202	21586474470	KCLB:SNU-1214	PRJNA523380	SAMN10987707	Human	11622810772	SNU-1214	BROAD INSTITUTE	public	sra,bam	ncbi,s3,gs	gs.US,ncbi.public,s3.us-east-1	carcinoma (squamous_cell_carcinoma)	primary	Asian	SRX5415114	Illumina HiSeq 2500	cell line	RNASeq-SNU1214_UPPER_AERODIGESTIVE_TRACT	PAIRED	cDNA	TRANSCRIPTOMIC	Homo sapiens	ILLUMINA	2019-03-27T00:00:00Z	SNU1214_UPPER_AERODIGESTIVE_TRACT	cell culture	male	SRP186687	upper_aerodigestive_tract
SRR8615937	63	RNA-Seq	GCA_000001405.13	202	23045750952	KCLB:SNU-1272	PRJNA523380	SAMN10987719	Human	12373276038	SNU-1272	BROAD INSTITUTE	public	sra,bam	ncbi,gs,s3	gs.US,s3.us-east-1,ncbi.public	carcinoma (clear_cell_renal_cell_carcinoma)	primary	Asian	SRX5415113	Illumina HiSeq 2500	cell line	RNASeq-SNU1272_KIDNEY	PAIRED	cDNA	TRANSCRIPTOMIC	Homo sapiens	ILLUMINA	2019-03-27T00:00:00Z	SNU1272_KIDNEY	cell culture	female	SRP186687	kidney
SRR8615938	70	RNA-Seq	GCA_000001405.13	202	21100947674	KCLB:SNU-1197	PRJNA523380	SAMN10987710	Human	11376714424	SNU-1197	BROAD INSTITUTE	public	bam,sra	ncbi,s3,gs	s3.us-east-1,ncbi.public,gs.US	carcinoma	primary	Asian	SRX5415112	Illumina HiSeq 2500	cell line	RNASeq-SNU1197_LARGE_INTESTINE	PAIRED	cDNA	TRANSCRIPTOMIC	Homo sapiens	ILLUMINA	2019-03-27T00:00:00Z	SNU1197_LARGE_INTESTINE	cell culture	male	SRP186687	large_intestine
SRR8615939	50	RNA-Seq	GCA_000001405.13	202	27397882968	KCLB:SNU-119	PRJNA523380	SAMN10987751	Human	14699140694	SNU-119	BROAD INSTITUTE	public	sra,bam	ncbi,s3,gs	ncbi.public,gs.US,s3.us-east-1	carcinoma (adenocarcinoma)	primary	Asian	SRX5415111	Illumina HiSeq 2500	cell line	RNASeq-SNU119_OVARY	PAIRED	cDNA	TRANSCRIPTOMIC	Homo sapiens	ILLUMINA	2019-03-27T00:00:00Z	SNU119_OVARY	cell culture	female	SRP186687	ovary
SRR8615942	77	RNA-Seq	GCA_000001405.13	202	15936879890	HSSRB	PRJNA523380	SAMN10987821	Human	7552355014	KMS-28BM	BROAD INSTITUTE	public	sra,bam	ncbi,s3,gs	s3.us-east-1,gs.US,ncbi.public	lymphoid_neoplasm (plasma_cell_myeloma)	primary	Asian	SRX5415108	Illumina HiSeq 2500	cell line	RNASeq-KMS28BM_HAEMATOPOIETIC_AND_LYMPHOID_TISSUE	PAIRED	cDNA	TRANSCRIPTOMIC	Homo sapiens	ILLUMINA	2019-03-27T00:00:00Z	KMS28BM_HAEMATOPOIETIC_AND_LYMPHOID_TISSUE	cell culture	female	SRP186687	haematopoietic_and_lymphoid_tissue
SRR8615943	22	RNA-Seq	GCA_000001405.13	202	12868320918	DSMZ:KYO-1	PRJNA523380	SAMN10988458	Human	6086584152	KYO-1	BROAD INSTITUTE	public	sra,bam	s3,gs,ncbi	ncbi.public,s3.us-east-1,gs.US	haematopoietic_neoplasm (blast_phase_chronic_myeloid_leukaemia)	primary	Asian	SRX5415107	Illumina HiSeq 2500	cell line	RNASeq-KYO1_HAEMATOPOIETIC_AND_LYMPHOID_TISSUE	PAIRED	cDNA	TRANSCRIPTOMIC	Homo sapiens	ILLUMINA	2019-03-27T00:00:00Z	KYO1_HAEMATOPOIETIC_AND_LYMPHOID_TISSUE	cell culture	male	SRP186687	haematopoietic_and_lymphoid_tissue
SRR8615944	6	RNA-Seq	GCA_000001405.13	202	15392335562	ATCC:NCI-H1437	PRJNA523380	SAMN10987891	Human	7614217984	NCI-H1437	BROAD INSTITUTE	public	bam,sra	s3,gs,ncbi	gs.US,ncbi.public,s3.us-east-1	carcinoma (adenocarcinoma)	metastasis	Caucasian	SRX5415106	Illumina HiSeq 2500	cell line	RNASeq-NCIH1437_LUNG	PAIRED	cDNA	TRANSCRIPTOMIC	Homo sapiens	ILLUMINA	2019-03-27T00:00:00Z	NCIH1437_LUNG	cell culture	male	SRP186687	lung
SRR8615945	55	RNA-Seq	GCA_000001405.13	202	20495631242	ATCC:NCI-H1395	PRJNA523380	SAMN10988320	Human	10854058554	NCI-H1395	BROAD INSTITUTE	public	bam,sra	gs,ncbi,s3	ncbi.public,s3.us-east-1,gs.US	carcinoma (adenocarcinoma)	primary	Caucasian	SRX5415105	Illumina HiSeq 2500	cell line	RNASeq-NCIH1395_LUNG	PAIRED	cDNA	TRANSCRIPTOMIC	Homo sapiens	ILLUMINA	2019-03-27T00:00:00Z	NCIH1395_LUNG	cell culture	female	SRP186687	lung
SRR8615946	39	RNA-Seq	GCA_000001405.13	202	14620509116	ATCC:NCI-H1436	PRJNA523380	SAMN10988000	Human	7233733829	NCI-H1436	BROAD INSTITUTE	public	sra,bam	s3,ncbi,gs	s3.us-east-1,ncbi.public,gs.US	carcinoma (small_cell_carcinoma)	metastasis	Caucasian	SRX5415104	Illumina HiSeq 2500	cell line	RNASeq-NCIH1436_LUNG	PAIRED	cDNA	TRANSCRIPTOMIC	Homo sapiens	ILLUMINA	2019-03-27T00:00:00Z	NCIH1436_LUNG	cell culture	male	SRP186687	lung
SRR8615947	59	RNA-Seq	GCA_000001405.13	202	21395999984	DSMZ:SU-DHL-8	PRJNA523380	SAMN10988104	Human	10799077399	SU-DHL-8	BROAD INSTITUTE	public	bam,sra	s3,gs,ncbi	ncbi.public,gs.US,s3.us-east-1	lymphoid_neoplasm (diffuse_large_B_cell_lymphoma)	metastasis	Caucasian	SRX5415103	Illumina HiSeq 2500	cell line	RNASeq-SUDHL8_HAEMATOPOIETIC_AND_LYMPHOID_TISSUE	PAIRED	cDNA	TRANSCRIPTOMIC	Homo sapiens	ILLUMINA	2019-03-27T00:00:00Z	SUDHL8_HAEMATOPOIETIC_AND_LYMPHOID_TISSUE	cell culture	male	SRP186687	haematopoietic_and_lymphoid_tissue
SRR8615948	NA	RNA-Seq	GCA_000001405.13	202	21848333938	ECACC:COV318	PRJNA523380	SAMN10987637	Human	11322184301	COV318	BROAD INSTITUTE	public	bam,sra	ncbi,gs,s3	gs.US,s3.us-east-1,ncbi.public	carcinoma	primary	Caucasian	SRX5415102	Illumina HiSeq 2500	cell line	RNASeq-COV318_OVARY	PAIRED	cDNA	TRANSCRIPTOMIC	Homo sapiens	ILLUMINA	2019-03-27T00:00:00Z	COV318_OVARY	cell culture	female	SRP186687	ovary
SRR8615949	NA	RNA-Seq	GCA_000001405.13	202	20414193326	ECACC:COV362	PRJNA523380	SAMN10987971	Human	10960867090	COV362	BROAD INSTITUTE	public	bam,sra	gs,ncbi,s3	gs.US,ncbi.public,s3.us-east-1	carcinoma	primary	Caucasian	SRX5415101	Illumina HiSeq 2500	cell line	RNASeq-COV362_OVARY	PAIRED	cDNA	TRANSCRIPTOMIC	Homo sapiens	ILLUMINA	2019-03-27T00:00:00Z	COV362_OVARY	cell culture	female	SRP186687	ovary
SRR8615950	75	RNA-Seq	GCA_000001405.13	202	14099581214	HSSRB	PRJNA523380	SAMN10987829	Human	6654702778	KP-3	BROAD INSTITUTE	public	bam,sra	gs,ncbi,s3	ncbi.public,s3.us-east-1,gs.US	carcinoma (ductal_carcinoma)	metastasis	Asian	SRX5415100	Illumina HiSeq 2500	cell line	RNASeq-KP3_PANCREAS	PAIRED	cDNA	TRANSCRIPTOMIC	Homo sapiens	ILLUMINA	2019-03-27T00:00:00Z	KP3_PANCREAS	cell culture	male	SRP186687	pancreas
SRR8615951	65	RNA-Seq	GCA_000001405.13	202	16843475888	NIBRI	PRJNA523380	SAMN10988261	Human	8924758564	KP-2	BROAD INSTITUTE	public	bam,sra	gs,ncbi,s3	gs.US,s3.us-east-1,ncbi.public	carcinoma	primary	Asian	SRX5415099	Illumina HiSeq 2500	cell line	RNASeq-KP2_PANCREAS	PAIRED	cDNA	TRANSCRIPTOMIC	Homo sapiens	ILLUMINA	2019-03-27T00:00:00Z	KP2_PANCREAS	cell culture	female	SRP186687	pancreas
SRR8615952	45	RNA-Seq	GCA_000001405.13	202	17572927986	ATCC:DB	PRJNA523380	SAMN10987903	Human	8607120736	DB	BROAD INSTITUTE	public	bam,sra	gs,ncbi,s3	ncbi.public,s3.us-east-1,gs.US	lymphoid_neoplasm (diffuse_large_B_cell_lymphoma)	metastasis	Caucasian	SRX5415098	Illumina HiSeq 2500	cell line	RNASeq-DB_HAEMATOPOIETIC_AND_LYMPHOID_TISSUE	PAIRED	cDNA	TRANSCRIPTOMIC	Homo sapiens	ILLUMINA	2019-03-27T00:00:00Z	DB_HAEMATOPOIETIC_AND_LYMPHOID_TISSUE	cell culture	male	SRP186687	haematopoietic_and_lymphoid_tissue
SRR8615953	59	RNA-Seq	GCA_000001405.13	202	15418403662	ATCC:DBTRG-05MG	PRJNA523380	SAMN10988246	Human	7865719208	DBTRG-05MG	BROAD INSTITUTE	public	bam,sra	ncbi,gs,s3	s3.us-east-1,gs.US,ncbi.public	glioma (astrocytoma_Grade_IV\, glioblastoma_multiforme)	primary	Caucasian	SRX5415097	Illumina HiSeq 2500	cell line	RNASeq-DBTRG05MG_CENTRAL_NERVOUS_SYSTEM	PAIRED	cDNA	TRANSCRIPTOMIC	Homo sapiens	ILLUMINA	2019-03-27T00:00:00Z	DBTRG05MG_CENTRAL_NERVOUS_SYSTEM	cell culture	female	SRP186687	central_nervous_system
SRR8615954	39	RNA-Seq	GCA_000001405.13	202	22031046574	ATCC:NCI-H1648	PRJNA523380	SAMN10988142	Human	11623720113	NCI-H1648	BROAD INSTITUTE	public	sra,bam	ncbi,s3,gs	gs.US,s3.us-east-1,ncbi.public	carcinoma (adenocarcinoma)	metastasis	African_american	SRX5415096	Illumina HiSeq 2500	cell line	RNASeq-NCIH1648_LUNG	PAIRED	cDNA	TRANSCRIPTOMIC	Homo sapiens	ILLUMINA	2019-03-27T00:00:00Z	NCIH1648_LUNG	cell culture	male	SRP186687	lung
SRR8615955	NA	RNA-Seq	GCA_000001405.13	202	11005690028	ECACC:COV644	PRJNA523380	SAMN10988003	Human	5235587332	COV644	BROAD INSTITUTE	public	bam,sra	s3,gs,ncbi	gs.US,s3.us-east-1,ncbi.public	carcinoma	primary	Caucasian	SRX5415095	Illumina HiSeq 2500	cell line	RNASeq-COV644_OVARY	PAIRED	cDNA	TRANSCRIPTOMIC	Homo sapiens	ILLUMINA	2019-03-27T00:00:00Z	COV644_OVARY	cell culture	female	SRP186687	ovary
SRR8615956	NA	RNA-Seq	GCA_000001405.13	202	19206308672	ECACC:COV434	PRJNA523380	SAMN10987973	Human	10214646853	COV434	BROAD INSTITUTE	public	sra,bam	gs,s3,ncbi	s3.us-east-1,ncbi.public,gs.US	sex_cord-stromal_tumour (granulosa_cell_tumour)	primary	Caucasian	SRX5415094	Illumina HiSeq 2500	cell line	RNASeq-COV434_OVARY	PAIRED	cDNA	TRANSCRIPTOMIC	Homo sapiens	ILLUMINA	2019-03-27T00:00:00Z	COV434_OVARY	cell culture	female	SRP186687	ovary
SRR8615958	55	RNA-Seq	GCA_000001405.13	202	20864766446	RIKEN:CW-2	PRJNA523380	SAMN10987729	Human	11609763040	CW-2	BROAD INSTITUTE	public	sra,bam	gs,ncbi,s3	ncbi.public,s3.us-east-1,gs.US	carcinoma	primary	Asian	SRX5415092	Illumina HiSeq 2500	cell line	RNASeq-CW2_LARGE_INTESTINE	PAIRED	cDNA	TRANSCRIPTOMIC	Homo sapiens	ILLUMINA	2019-03-27T00:00:00Z	CW2_LARGE_INTESTINE	cell culture	female	SRP186687	large_intestine
SRR8615959	NA	RNA-Seq	GCA_000001405.13	202	20371574154	DSMZ:DAN-G	PRJNA523380	SAMN10987807	Human	10170936344	DAN-G	BROAD INSTITUTE	public	sra,bam	gs,ncbi,s3	s3.us-east-1,gs.US,ncbi.public	carcinoma	primary	Caucasian	SRX5415091	Illumina HiSeq 2500	cell line	RNASeq-DANG_PANCREAS	PAIRED	cDNA	TRANSCRIPTOMIC	Homo sapiens	ILLUMINA	2019-03-27T00:00:00Z	DANG_PANCREAS	cell culture	NA	SRP186687	pancreas
SRR8615960	3.5	RNA-Seq	GCA_000001405.13	202	18384096558	NIBRI	PRJNA523380	SAMN10988120	Human	10170391367	D341 Med	BROAD INSTITUTE	public	sra,bam	ncbi,gs,s3	gs.US,ncbi.public,s3.us-east-1	primitive_neuroectodermal_tumour-medulloblastoma	primary	Caucasian	SRX5415090	Illumina HiSeq 2500	cell line	RNASeq-D341MED_CENTRAL_NERVOUS_SYSTEM	PAIRED	cDNA	TRANSCRIPTOMIC	Homo sapiens	ILLUMINA	2019-03-27T00:00:00Z	D341MED_CENTRAL_NERVOUS_SYSTEM	cell culture	male	SRP186687	central_nervous_system
SRR8615961	16	RNA-Seq	GCA_000001405.13	202	26400597252	NIBRI	PRJNA523380	SAMN10987948	Human	14808842742	Daudi	BROAD INSTITUTE	public	sra,bam	s3,gs,ncbi	s3.us-east-1,ncbi.public,gs.US	lymphoid_neoplasm (Burkitt_lymphoma)	primary	African_american	SRX5415089	Illumina HiSeq 2500	cell line	RNASeq-DAUDI_HAEMATOPOIETIC_AND_LYMPHOID_TISSUE	PAIRED	cDNA	TRANSCRIPTOMIC	Homo sapiens	ILLUMINA	2019-03-27T00:00:00Z	DAUDI_HAEMATOPOIETIC_AND_LYMPHOID_TISSUE	cell culture	male	SRP186687	haematopoietic_and_lymphoid_tissue
SRR8615962	4	RNA-Seq	GCA_000001405.13	202	16687659148	NIBRI	PRJNA523380	SAMN10988097	Human	8276181727	Daoy	BROAD INSTITUTE	public	sra,bam	ncbi,s3,gs	gs.US,ncbi.public,s3.us-east-1	primitive_neuroectodermal_tumour-medulloblastoma	primary	Caucasian	SRX5415088	Illumina HiSeq 2500	cell line	RNASeq-DAOY_CENTRAL_NERVOUS_SYSTEM	PAIRED	cDNA	TRANSCRIPTOMIC	Homo sapiens	ILLUMINA	2019-03-27T00:00:00Z	DAOY_CENTRAL_NERVOUS_SYSTEM	cell culture	male	SRP186687	central_nervous_system
SRR8615963	NA	RNA-Seq	GCA_000001405.13	202	22167333146	GNF	PRJNA523380	SAMN10987708	Human	12434752897	COR-L105	BROAD INSTITUTE	public	sra,bam	gs,s3,ncbi	gs.US,ncbi.public,s3.us-east-1	carcinoma (adenocarcinoma)	primary	Caucasian	SRX5415087	Illumina HiSeq 2500	cell line	RNASeq-CORL105_LUNG	PAIRED	cDNA	TRANSCRIPTOMIC	Homo sapiens	ILLUMINA	2019-03-27T00:00:00Z	CORL105_LUNG	cell culture	male	SRP186687	lung
SRR8615964	NA	RNA-Seq	GCA_000001405.13	202	25738273996	RIKEN:RCC10RGB	PRJNA523380	SAMN10987699	Human	13840440069	RCC10RGB	BROAD INSTITUTE	public	bam,sra	gs,ncbi,s3	gs.US,ncbi.public,s3.us-east-1	carcinoma (renal_cell_carcinoma)	primary	Asian	SRX5415086	Illumina HiSeq 2500	cell line	RNASeq-RCC10RGB_KIDNEY	PAIRED	cDNA	TRANSCRIPTOMIC	Homo sapiens	ILLUMINA	2019-03-27T00:00:00Z	RCC10RGB_KIDNEY	cell culture	male	SRP186687	kidney
SRR8615965	8	RNA-Seq	GCA_000001405.13	202	25189273144	DSMZ:RCH-ACV	PRJNA523380	SAMN10989563	Human	13505561176	RCH-ACV	BROAD INSTITUTE	public	bam,sra	s3,ncbi,gs	ncbi.public,gs.US,s3.us-east-1	lymphoid_neoplasm (acute_lymphoblastic_B_cell_leukaemia)	primary	Caucasian	SRX5415085	Illumina HiSeq 2500	cell line	RNASeq-RCHACV_HAEMATOPOIETIC_AND_LYMPHOID_TISSUE	PAIRED	cDNA	TRANSCRIPTOMIC	Homo sapiens	ILLUMINA	2019-03-27T00:00:00Z	RCHACV_HAEMATOPOIETIC_AND_LYMPHOID_TISSUE	cell culture	female	SRP186687	haematopoietic_and_lymphoid_tissue
SRR8615966	48	RNA-Seq	GCA_000001405.13	202	18051172884	NIBRI	PRJNA523380	SAMN10987632	Human	8827677938	Hs 611.T	BROAD INSTITUTE	public	sra,bam	ncbi,gs,s3	s3.us-east-1,ncbi.public,gs.US	lymphoid_neoplasm (Hodgkin_lymphoma)	primary	Caucasian	SRX5415084	Illumina HiSeq 2500	cell line	RNASeq-HS611T_HAEMATOPOIETIC_AND_LYMPHOID_TISSUE	PAIRED	cDNA	TRANSCRIPTOMIC	Homo sapiens	ILLUMINA	2019-03-27T00:00:00Z	HS611T_HAEMATOPOIETIC_AND_LYMPHOID_TISSUE	cell culture	female	SRP186687	haematopoietic_and_lymphoid_tissue
SRR8615967	NA	RNA-Seq	GCA_000001405.13	202	17821306378	NA	PRJNA523380	SAMN10989584	Human	9526460015	PLB-985	BROAD INSTITUTE	public	bam,sra	ncbi,gs,s3	ncbi.public,gs.US,s3.us-east-1	haematopoietic_neoplasm (acute_myeloid_leukaemia)	NA	Caucasian	SRX5415083	Illumina HiSeq 2500	cell line	RNASeq-PLB985_HAEMATOPOIETIC_AND_LYMPHOID_TISSUE	PAIRED	cDNA	TRANSCRIPTOMIC	Homo sapiens	ILLUMINA	2019-03-27T00:00:00Z	PLB985_HAEMATOPOIETIC_AND_LYMPHOID_TISSUE	cell culture	NA	SRP186687	haematopoietic_and_lymphoid_tissue
SRR8615968	24	RNA-Seq	GCA_000001405.13	202	17711230922	ATCC:PLC/PRF/5	PRJNA523380	SAMN10988112	Human	8861354488	PLC/PRF/5	BROAD INSTITUTE	public	bam,sra	ncbi,gs,s3	ncbi.public,gs.US,s3.us-east-1	carcinoma (hepatocellular_carcinoma)	primary	African_american	SRX5415082	Illumina HiSeq 2500	cell line	RNASeq-PLCPRF5_LIVER	PAIRED	cDNA	TRANSCRIPTOMIC	Homo sapiens	ILLUMINA	2019-03-27T00:00:00Z	PLCPRF5_LIVER	cell culture	male	SRP186687	liver
SRR8615969	NA	RNA-Seq	GCA_000001405.13	202	22555364844	JCRB:PK-59	PRJNA523380	SAMN10988281	Human	12149601795	PK-59	BROAD INSTITUTE	public	sra,bam	s3,ncbi,gs	ncbi.public,s3.us-east-1,gs.US	carcinoma	primary	Asian	SRX5415081	Illumina HiSeq 2500	cell line	RNASeq-PK59_PANCREAS	PAIRED	cDNA	TRANSCRIPTOMIC	Homo sapiens	ILLUMINA	2019-03-27T00:00:00Z	PK59_PANCREAS	cell culture	NA	SRP186687	pancreas
SRR8615970	24	RNA-Seq	GCA_000001405.13	202	21953707844	DSMZ:PL-21	PRJNA523380	SAMN10988496	Human	11852949267	PL-21	BROAD INSTITUTE	public	bam,sra	s3,ncbi,gs	ncbi.public,gs.US,s3.us-east-1	haematopoietic_neoplasm (acute_myeloid_leukaemia\, M3)	primary	Asian	SRX5415080	Illumina HiSeq 2500	cell line	RNASeq-PL21_HAEMATOPOIETIC_AND_LYMPHOID_TISSUE	PAIRED	cDNA	TRANSCRIPTOMIC	Homo sapiens	ILLUMINA	2019-03-27T00:00:00Z	PL21_HAEMATOPOIETIC_AND_LYMPHOID_TISSUE	cell culture	male	SRP186687	haematopoietic_and_lymphoid_tissue
SRR8615971	61	RNA-Seq	GCA_000001405.13	202	19872839386	HSRRB	PRJNA523380	SAMN10988306	Human	9959699966	QGP-1	BROAD INSTITUTE	public	bam,sra	ncbi,s3,gs	ncbi.public,gs.US,s3.us-east-1	carcinoma	primary	Asian	SRX5415079	Illumina HiSeq 2500	cell line	RNASeq-QGP1_PANCREAS	PAIRED	cDNA	TRANSCRIPTOMIC	Homo sapiens	ILLUMINA	2019-03-27T00:00:00Z	QGP1_PANCREAS	cell culture	male	SRP186687	pancreas
SRR8615972	12	RNA-Seq	GCA_000001405.13	202	22609112600	NIBRI	PRJNA523380	SAMN10987653	Human	12198246444	Raji	BROAD INSTITUTE	public	bam,sra	s3,gs,ncbi	ncbi.public,s3.us-east-1,gs.US	lymphoid_neoplasm (Burkitt_lymphoma)	primary	African_american	SRX5415078	Illumina HiSeq 2500	cell line	RNASeq-RAJI_HAEMATOPOIETIC_AND_LYMPHOID_TISSUE	PAIRED	cDNA	TRANSCRIPTOMIC	Homo sapiens	ILLUMINA	2019-03-27T00:00:00Z	RAJI_HAEMATOPOIETIC_AND_LYMPHOID_TISSUE	cell culture	male	SRP186687	haematopoietic_and_lymphoid_tissue
SRR8615973	NA	RNA-Seq	GCA_000001405.13	202	12879928848	NA	PRJNA523380	SAMN10988400	Human	6892719357	PrEC LH	BROAD INSTITUTE	public	sra,bam	ncbi,s3,gs	ncbi.public,gs.US,s3.us-east-1	other (immortalized_epithelial)	NA	Caucasian	SRX5415077	Illumina HiSeq 2500	cell line	RNASeq-PRECLH_PROSTATE	PAIRED	cDNA	TRANSCRIPTOMIC	Homo sapiens	ILLUMINA	2019-03-27T00:00:00Z	PRECLH_PROSTATE	cell culture	NA	SRP186687	prostate
SRR8615974	NA	RNA-Seq	GCA_000001405.13	202	17457512256	ECACC:PSN1	PRJNA523380	SAMN10988384	Human	8699052492	PSN1	BROAD INSTITUTE	public	sra,bam	ncbi,gs,s3	ncbi.public,s3.us-east-1,gs.US	carcinoma (ductal_carcinoma)	primary	Asian	SRX5415076	Illumina HiSeq 2500	cell line	RNASeq-PSN1_PANCREAS	PAIRED	cDNA	TRANSCRIPTOMIC	Homo sapiens	ILLUMINA	2019-03-27T00:00:00Z	PSN1_PANCREAS	cell culture	NA	SRP186687	pancreas
SRR8615975	51	RNA-Seq	GCA_000001405.13	202	38012760364	NA	PRJNA523380	SAMN10988536	Human	18931859669	NCI-H841	BROAD INSTITUTE	public	bam,sra	s3,ncbi,gs	s3.us-east-1,gs.US,ncbi.public	carcinoma (small_cell_carcinoma)	metastasis	Caucasian	SRX5415075	Illumina HiSeq 2500	cell line	RNASeq-NCIH841_LUNG	PAIRED	cDNA	TRANSCRIPTOMIC	Homo sapiens	ILLUMINA	2019-03-27T00:00:00Z	NCIH841_LUNG	cell culture	male	SRP186687	lung
SRR8615976	59	RNA-Seq	GCA_000001405.13	202	24402778064	ATCC:NCI-H838	PRJNA523380	SAMN10987750	Human	12950938053	NCI-H838	BROAD INSTITUTE	public	sra,bam	s3,gs,ncbi	gs.US,ncbi.public,s3.us-east-1	carcinoma (non_small_cell_carcinoma)	metastasis	Caucasian	SRX5415074	Illumina HiSeq 2500	cell line	RNASeq-NCIH838_LUNG	PAIRED	cDNA	TRANSCRIPTOMIC	Homo sapiens	ILLUMINA	2019-03-27T00:00:00Z	NCIH838_LUNG	cell culture	male	SRP186687	lung
SRR8615978	NA	RNA-Seq	GCA_000001405.13	202	18575635180	KCLB:NCI-H854	PRJNA523380	SAMN10988075	Human	9831244119	NCI-H854	BROAD INSTITUTE	public	bam,sra	s3,gs,ncbi	gs.US,ncbi.public,s3.us-east-1	carcinoma (adenocarcinoma)	primary	Caucasian	SRX5415072	Illumina HiSeq 2500	cell line	RNASeq-NCIH854_LUNG	PAIRED	cDNA	TRANSCRIPTOMIC	Homo sapiens	ILLUMINA	2019-03-27T00:00:00Z	NCIH854_LUNG	cell culture	NA	SRP186687	lung
SRR8615981	41	RNA-Seq	GCA_000001405.13	202	14968109302	ATCC:NCI-H82	PRJNA523380	SAMN10987912	Human	7384641526	NCI-H82	BROAD INSTITUTE	public	sra,bam	gs,s3,ncbi	gs.US,s3.us-east-1,ncbi.public	carcinoma (small_cell_carcinoma)	metastasis	Caucasian	SRX5415069	Illumina HiSeq 2500	cell line	RNASeq-NCIH82_LUNG	PAIRED	cDNA	TRANSCRIPTOMIC	Homo sapiens	ILLUMINA	2019-03-27T00:00:00Z	NCIH82_LUNG	cell culture	male	SRP186687	lung
SRR8615982	51	RNA-Seq	GCA_000001405.13	202	18553146520	GNF	PRJNA523380	SAMN10987804	Human	9802564591	NCI-H810	BROAD INSTITUTE	public	bam,sra	s3,ncbi,gs	ncbi.public,s3.us-east-1,gs.US	carcinoma (large_cell_carcinoma)	primary	African_american	SRX5415068	Illumina HiSeq 2500	cell line	RNASeq-NCIH810_LUNG	PAIRED	cDNA	TRANSCRIPTOMIC	Homo sapiens	ILLUMINA	2019-03-27T00:00:00Z	NCIH810_LUNG	cell culture	male	SRP186687	lung
SRR8615984	54	RNA-Seq	GCA_000001405.13	202	21632019814	ATCC:NCI-H1703	PRJNA523380	SAMN10988304	Human	11377351896	NCI-H1703	BROAD INSTITUTE	public	bam,sra	ncbi,s3,gs	ncbi.public,gs.US,s3.us-east-1	carcinoma (adenocarcinoma)	primary	Caucasian	SRX5415066	Illumina HiSeq 2500	cell line	RNASeq-NCIH1703_LUNG	PAIRED	cDNA	TRANSCRIPTOMIC	Homo sapiens	ILLUMINA	2019-03-27T00:00:00Z	NCIH1703_LUNG	cell culture	male	SRP186687	lung
SRR8615985	56	RNA-Seq	GCA_000001405.13	202	23152779238	ATCC:NCI-H1734	PRJNA523380	SAMN10987672	Human	12155445302	NCI-H1734	BROAD INSTITUTE	public	sra,bam	ncbi,s3,gs	ncbi.public,gs.US,s3.us-east-1	carcinoma (adenocarcinoma)	primary	Caucasian	SRX5415065	Illumina HiSeq 2500	cell line	RNASeq-NCIH1734_LUNG	PAIRED	cDNA	TRANSCRIPTOMIC	Homo sapiens	ILLUMINA	2019-03-27T00:00:00Z	NCIH1734_LUNG	cell culture	female	SRP186687	lung
SRR8615986	65	RNA-Seq	GCA_000001405.13	202	20728737020	ATCC:NCI-H1755	PRJNA523380	SAMN10988171	Human	10898646295	NCI-H1755	BROAD INSTITUTE	public	bam,sra	ncbi,gs,s3	s3.us-east-1,gs.US,ncbi.public	carcinoma (adenocarcinoma)	metastasis	Caucasian	SRX5415064	Illumina HiSeq 2500	cell line	RNASeq-NCIH1755_LUNG	PAIRED	cDNA	TRANSCRIPTOMIC	Homo sapiens	ILLUMINA	2019-03-27T00:00:00Z	NCIH1755_LUNG	cell culture	female	SRP186687	lung
SRR8615987	27	RNA-Seq	GCA_000001405.13	202	20037691586	ATCC:NCI-H1650	PRJNA523380	SAMN10987889	Human	9904949832	NCI-H1650	BROAD INSTITUTE	public	sra,bam	s3,gs,ncbi	ncbi.public,gs.US,s3.us-east-1	carcinoma (bronchioloalveolar_adenocarcinoma)	metastasis	Caucasian	SRX5415063	Illumina HiSeq 2500	cell line	RNASeq-NCIH1650_LUNG	PAIRED	cDNA	TRANSCRIPTOMIC	Homo sapiens	ILLUMINA	2019-03-27T00:00:00Z	NCIH1650_LUNG	cell culture	male	SRP186687	lung
SRR8615988	71	RNA-Seq	GCA_000001405.13	202	13592948448	ATCC:NCI-H1651	PRJNA523380	SAMN10987663	Human	6743955324	NCI-H1651	BROAD INSTITUTE	public	bam,sra	gs,s3,ncbi	s3.us-east-1,ncbi.public,gs.US	carcinoma (adenocarcinoma)	primary	Caucasian	SRX5415062	Illumina HiSeq 2500	cell line	RNASeq-NCIH1651_LUNG	PAIRED	cDNA	TRANSCRIPTOMIC	Homo sapiens	ILLUMINA	2019-03-27T00:00:00Z	NCIH1651_LUNG	cell culture	male	SRP186687	lung
SRR8615989	50	RNA-Seq	GCA_000001405.13	202	16177064354	ATCC:NCI-H1666	PRJNA523380	SAMN10987669	Human	8017044477	NCI-H1666	BROAD INSTITUTE	public	sra,bam	gs,ncbi,s3	ncbi.public,s3.us-east-1,gs.US	carcinoma (bronchioloalveolar_adenocarcinoma)	metastasis	Caucasian	SRX5415061	Illumina HiSeq 2500	cell line	RNASeq-NCIH1666_LUNG	PAIRED	cDNA	TRANSCRIPTOMIC	Homo sapiens	ILLUMINA	2019-03-27T00:00:00Z	NCIH1666_LUNG	cell culture	female	SRP186687	lung
SRR8615990	55	RNA-Seq	GCA_000001405.13	202	19528694410	ATCC:NCI-H1693	PRJNA523380	SAMN10988173	Human	10376042936	NCI-H1693	BROAD INSTITUTE	public	sra,bam	s3,gs,ncbi	ncbi.public,gs.US,s3.us-east-1	carcinoma (adenocarcinoma)	metastasis	Caucasian	SRX5415060	Illumina HiSeq 2500	cell line	RNASeq-NCIH1693_LUNG	PAIRED	cDNA	TRANSCRIPTOMIC	Homo sapiens	ILLUMINA	2019-03-27T00:00:00Z	NCIH1693_LUNG	cell culture	female	SRP186687	lung
SRR8615991	57	RNA-Seq	GCA_000001405.13	202	21067870376	DSMZ:COLO-680N	PRJNA523380	SAMN10988482	Human	11211586013	COLO-680N	BROAD INSTITUTE	public	bam,sra	ncbi,gs,s3	gs.US,s3.us-east-1,ncbi.public	carcinoma (squamous_cell_carcinoma)	primary	African_american	SRX5415059	Illumina HiSeq 2500	cell line	RNASeq-COLO680N_OESOPHAGUS	PAIRED	cDNA	TRANSCRIPTOMIC	Homo sapiens	ILLUMINA	2019-03-27T00:00:00Z	COLO680N_OESOPHAGUS	cell culture	female	SRP186687	oesophagus
SRR8615992	70	RNA-Seq	GCA_000001405.13	202	19437342334	KCLB:SNU-685	PRJNA523380	SAMN10988056	Human	10472372066	SNU-685	BROAD INSTITUTE	public	bam,sra	gs,s3,ncbi	gs.US,ncbi.public,s3.us-east-1	carcinoma (carcinosarcoma-malignant_mesodermal_mixed_tumour)	primary	Asian	SRX5415058	Illumina HiSeq 2500	cell line	RNASeq-SNU685_ENDOMETRIUM	PAIRED	cDNA	TRANSCRIPTOMIC	Homo sapiens	ILLUMINA	2019-03-27T00:00:00Z	SNU685_ENDOMETRIUM	cell culture	female	SRP186687	endometrium
SRR8615993	NA	RNA-Seq	GCA_000001405.13	202	15993307984	JCRB:RERF-LC-MS	PRJNA523380	SAMN10987805	Human	8055821148	RERF-LC-MS	BROAD INSTITUTE	public	bam,sra	s3,gs,ncbi	ncbi.public,gs.US,s3.us-east-1	carcinoma (non_small_cell_carcinoma)	primary	Asian	SRX5415057	Illumina HiSeq 2500	cell line	RNASeq-RERFLCMS_LUNG	PAIRED	cDNA	TRANSCRIPTOMIC	Homo sapiens	ILLUMINA	2019-03-27T00:00:00Z	RERFLCMS_LUNG	cell culture	NA	SRP186687	lung
SRR8615994	NA	RNA-Seq	GCA_000001405.13	202	18955773728	NA	PRJNA523380	SAMN10989602	Human	10130912982	HCC2450	BROAD INSTITUTE	public	sra,bam	s3,gs,ncbi	gs.US,ncbi.public,s3.us-east-1	NA	NA	NA	SRX5415056	Illumina HiSeq 2500	cell line	RNASeq-HCC2450_LUNG	PAIRED	cDNA	TRANSCRIPTOMIC	Homo sapiens	ILLUMINA	2019-03-27T00:00:00Z	HCC2450_LUNG	cell culture	NA	SRP186687	lung
SRR8615995	NA	RNA-Seq	GCA_000001405.13	202	66897968928	NA	PRJNA523380	SAMN10989601	Human	35618477944	HCC2429	BROAD INSTITUTE	public	bam,sra	gs,ncbi,s3	gs.US,s3.us-east-1,ncbi.public	NA	NA	NA	SRX5415055	Illumina HiSeq 2500	cell line	RNASeq-HCC2429_LUNG	PAIRED	cDNA	TRANSCRIPTOMIC	Homo sapiens	ILLUMINA	2019-03-27T00:00:00Z	HCC2429_LUNG	cell culture	NA	SRP186687	lung
SRR8615996	39	RNA-Seq	GCA_000001405.13	202	18444624444	ATCC:HCC2935	PRJNA523380	SAMN10988553	Human	9103659119	HCC2935	BROAD INSTITUTE	public	bam,sra	s3,gs,ncbi	s3.us-east-1,ncbi.public,gs.US	carcinoma (non_small_cell_carcinoma)	primary	Caucasian	SRX5415054	Illumina HiSeq 2500	cell line	RNASeq-HCC2935_LUNG	PAIRED	cDNA	TRANSCRIPTOMIC	Homo sapiens	ILLUMINA	2019-03-27T00:00:00Z	HCC2935_LUNG	cell culture	male	SRP186687	lung
SRR8615997	NA	RNA-Seq	GCA_000001405.13	202	18998506020	NA	PRJNA523380	SAMN10988397	Human	10133730794	HCC-2814	BROAD INSTITUTE	public	bam,sra	ncbi,s3,gs	gs.US,s3.us-east-1,ncbi.public	carcinoma (squamous_cell_carcinoma)	NA	Caucasian	SRX5415053	Illumina HiSeq 2500	cell line	RNASeq-HCC2814_LUNG	PAIRED	cDNA	TRANSCRIPTOMIC	Homo sapiens	ILLUMINA	2019-03-27T00:00:00Z	HCC2814_LUNG	cell culture	NA	SRP186687	lung
SRR8615999	59	RNA-Seq	GCA_000001405.13	202	17814920148	KCLB:HCC-2108	PRJNA523380	SAMN10987967	Human	8771736150	HCC-2108	BROAD INSTITUTE	public	bam,sra	ncbi,s3,gs	s3.us-east-1,gs.US,ncbi.public	carcinoma (adenocarcinoma)	primary	Caucasian	SRX5415051	Illumina HiSeq 2500	cell line	RNASeq-HCC2108_LUNG	PAIRED	cDNA	TRANSCRIPTOMIC	Homo sapiens	ILLUMINA	2019-03-27T00:00:00Z	HCC2108_LUNG	cell culture	male	SRP186687	lung
SRR8616000	52	RNA-Seq	GCA_000001405.13	202	15371648742	KCLB:HCC-2279	PRJNA523380	SAMN10987735	Human	7522553412	HCC-2279	BROAD INSTITUTE	public	sra,bam	ncbi,s3,gs	ncbi.public,gs.US,s3.us-east-1	carcinoma (adenocarcinoma)	primary	Asian	SRX5415050	Illumina HiSeq 2500	cell line	RNASeq-HCC2279_LUNG	PAIRED	cDNA	TRANSCRIPTOMIC	Homo sapiens	ILLUMINA	2019-03-27T00:00:00Z	HCC2279_LUNG	cell culture	female	SRP186687	lung
SRR8616001	38	RNA-Seq	GCA_000001405.13	202	19831879038	ATCC:HCC2218	PRJNA523380	SAMN10987816	Human	9924218709	HCC2218	BROAD INSTITUTE	public	bam,sra	gs,ncbi,s3	gs.US,ncbi.public,s3.us-east-1	carcinoma (ductal_carcinoma)	primary	Caucasian	SRX5415049	Illumina HiSeq 2500	cell line	RNASeq-HCC2218_BREAST	PAIRED	cDNA	TRANSCRIPTOMIC	Homo sapiens	ILLUMINA	2019-03-27T00:00:00Z	HCC2218_BREAST	cell culture	female	SRP186687	breast
SRR8616004	50	RNA-Seq	GCA_000001405.13	202	16706597456	ECACC:DMS 273	PRJNA523380	SAMN10987982	Human	8299033989	DMS 273	BROAD INSTITUTE	public	bam,sra	ncbi,s3,gs	gs.US,ncbi.public,s3.us-east-1	carcinoma (small_cell_carcinoma)	metastasis	Caucasian	SRX5415046	Illumina HiSeq 2500	cell line	RNASeq-DMS273_LUNG	PAIRED	cDNA	TRANSCRIPTOMIC	Homo sapiens	ILLUMINA	2019-03-27T00:00:00Z	DMS273_LUNG	cell culture	female	SRP186687	lung
SRR8616005	NA	RNA-Seq	GCA_000001405.13	202	18909928616	ECACC:DMS 454	PRJNA523380	SAMN10987979	Human	9395663160	DMS 454	BROAD INSTITUTE	public	sra,bam	s3,ncbi,gs	gs.US,ncbi.public,s3.us-east-1	carcinoma (small_cell_carcinoma)	primary	Caucasian	SRX5415045	Illumina HiSeq 2500	cell line	RNASeq-DMS454_LUNG	PAIRED	cDNA	TRANSCRIPTOMIC	Homo sapiens	ILLUMINA	2019-03-27T00:00:00Z	DMS454_LUNG	cell culture	male	SRP186687	lung
SRR8616006	12	RNA-Seq	GCA_000001405.13	202	19815849328	DSMZ:DEL	PRJNA523380	SAMN10988540	Human	11059812557	DEL	BROAD INSTITUTE	public	bam,sra	gs,ncbi,s3	ncbi.public,s3.us-east-1,gs.US	lymphoid_neoplasm	metastasis	Caucasian	SRX5415044	Illumina HiSeq 2500	cell line	RNASeq-DEL_HAEMATOPOIETIC_AND_LYMPHOID_TISSUE	PAIRED	cDNA	TRANSCRIPTOMIC	Homo sapiens	ILLUMINA	2019-03-27T00:00:00Z	DEL_HAEMATOPOIETIC_AND_LYMPHOID_TISSUE	cell culture	male	SRP186687	haematopoietic_and_lymphoid_tissue
SRR8616007	NA	RNA-Seq	GCA_000001405.13	202	21085302976	ATCC:Detroit 562	PRJNA523380	SAMN10988307	Human	11813676300	Detroit 562	BROAD INSTITUTE	public	sra,bam	gs,s3,ncbi	s3.us-east-1,ncbi.public,gs.US	carcinoma	metastasis	Caucasian	SRX5415043	Illumina HiSeq 2500	cell line	RNASeq-DETROIT562_UPPER_AERODIGESTIVE_TRACT	PAIRED	cDNA	TRANSCRIPTOMIC	Homo sapiens	ILLUMINA	2019-03-27T00:00:00Z	DETROIT562_UPPER_AERODIGESTIVE_TRACT	cell culture	female	SRP186687	upper_aerodigestive_tract
SRR8616008	67	RNA-Seq	GCA_000001405.13	202	14520128650	DSMZ:DK-MG	PRJNA523380	SAMN10988036	Human	7624269206	DK-MG	BROAD INSTITUTE	public	bam,sra	gs,ncbi,s3	gs.US,ncbi.public,s3.us-east-1	glioma (astrocytoma_Grade_IV\, glioblastoma_multiforme)	primary	Caucasian	SRX5415042	Illumina HiSeq 2500	cell line	RNASeq-DKMG_CENTRAL_NERVOUS_SYSTEM	PAIRED	cDNA	TRANSCRIPTOMIC	Homo sapiens	ILLUMINA	2019-03-27T00:00:00Z	DKMG_CENTRAL_NERVOUS_SYSTEM	cell culture	female	SRP186687	central_nervous_system
SRR8616010	64	RNA-Seq	GCA_000001405.13	202	17672189170	RIKEN:T3M-4	PRJNA523380	SAMN10988105	Human	8890260174	T3M-4	BROAD INSTITUTE	public	sra,bam	gs,ncbi,s3	ncbi.public,s3.us-east-1,gs.US	carcinoma (ductal_carcinoma)	metastasis	Asian	SRX5415040	Illumina HiSeq 2500	cell line	RNASeq-T3M4_PANCREAS	PAIRED	cDNA	TRANSCRIPTOMIC	Homo sapiens	ILLUMINA	2019-03-27T00:00:00Z	T3M4_PANCREAS	cell culture	male	SRP186687	pancreas
SRR8616011	73	RNA-Seq	GCA_000001405.13	202	9722661374	HSSRB	PRJNA523380	SAMN10988018	Human	4626011965	SUIT-2	BROAD INSTITUTE	public	bam,sra	s3,gs,ncbi	s3.us-east-1,ncbi.public,gs.US	carcinoma (ductal_carcinoma)	metastasis	Asian	SRX5415039	Illumina HiSeq 2500	cell line	RNASeq-SUIT2_PANCREAS	PAIRED	cDNA	TRANSCRIPTOMIC	Homo sapiens	ILLUMINA	2019-03-27T00:00:00Z	SUIT2_PANCREAS	cell culture	male	SRP186687	pancreas
SRR8616012	15	RNA-Seq	GCA_000001405.13	202	22296397814	NIBRI	PRJNA523380	SAMN10987881	Human	11928202528	A-673	BROAD INSTITUTE	public	sra,bam	s3,gs,ncbi	gs.US,ncbi.public,s3.us-east-1	Ewings_sarcoma-peripheral_primitive_neuroectodermal_tumour	primary	Caucasian	SRX5415038	Illumina HiSeq 2500	cell line	RNASeq-A673_BONE	PAIRED	cDNA	TRANSCRIPTOMIC	Homo sapiens	ILLUMINA	2019-03-27T00:00:00Z	A673_BONE	cell culture	female	SRP186687	bone
SRR8616013	78	RNA-Seq	GCA_000001405.13	202	15758213516	GNF	PRJNA523380	SAMN10987988	Human	7900896288	A-704	BROAD INSTITUTE	public	sra,bam	ncbi,gs,s3	ncbi.public,gs.US,s3.us-east-1	carcinoma (renal_cell_carcinoma)	primary	African_american	SRX5415037	Illumina HiSeq 2500	cell line	RNASeq-A704_KIDNEY	PAIRED	cDNA	TRANSCRIPTOMIC	Homo sapiens	ILLUMINA	2019-03-27T00:00:00Z	A704_KIDNEY	cell culture	male	SRP186687	kidney
SRR8616014	NA	RNA-Seq	GCA_000001405.13	202	25389746024	NA	PRJNA523380	SAMN10989597	Human	13565263711	A427	BROAD INSTITUTE	public	sra,bam	s3,gs,ncbi	s3.us-east-1,gs.US,ncbi.public	NA	NA	NA	SRX5415036	Illumina HiSeq 2500	cell line	RNASeq-A427_LUNG	PAIRED	cDNA	TRANSCRIPTOMIC	Homo sapiens	ILLUMINA	2019-03-27T00:00:00Z	A427_LUNG	cell culture	NA	SRP186687	lung
SRR8616015	52	RNA-Seq	GCA_000001405.13	202	15850157654	NA	PRJNA523380	SAMN10987879	Human	7999351552	A-498	BROAD INSTITUTE	public	sra,bam	ncbi,gs,s3	ncbi.public,gs.US,s3.us-east-1	carcinoma (renal_cell_carcinoma)	primary	Caucasian	SRX5415035	Illumina HiSeq 2500	cell line	RNASeq-A498_KIDNEY	PAIRED	cDNA	TRANSCRIPTOMIC	Homo sapiens	ILLUMINA	2019-03-27T00:00:00Z	A498_KIDNEY	cell culture	male	SRP186687	kidney
SRR8616017	58	RNA-Seq	GCA_000001405.13	202	18626131746	ATCC:A549	PRJNA523380	SAMN10988257	Human	9116073423	A549	BROAD INSTITUTE	public	sra,bam	ncbi,s3,gs	ncbi.public,s3.us-east-1,gs.US	carcinoma (non_small_cell_carcinoma)	primary	Caucasian	SRX5415033	Illumina HiSeq 2500	cell line	RNASeq-A549_LUNG	PAIRED	cDNA	TRANSCRIPTOMIC	Homo sapiens	ILLUMINA	2019-03-27T00:00:00Z	A549_LUNG	cell culture	male	SRP186687	lung
SRR8616018	54	RNA-Seq	GCA_000001405.13	202	16789334030	ATCC:A-253	PRJNA523380	SAMN10988034	Human	8400996705	A-253	BROAD INSTITUTE	public	sra,bam	ncbi,gs,s3	gs.US,s3.us-east-1,ncbi.public	carcinoma (mucoepidermoid_carcinoma)	primary	Caucasian	SRX5415032	Illumina HiSeq 2500	cell line	RNASeq-A253_SALIVARY_GLAND	PAIRED	cDNA	TRANSCRIPTOMIC	Homo sapiens	ILLUMINA	2019-03-27T00:00:00Z	A253_SALIVARY_GLAND	cell culture	male	SRP186687	salivary_gland
SRR8616019	NA	RNA-Seq	GCA_000001405.13	202	18223725122	NIBRI	PRJNA523380	SAMN10988216	Human	9163296071	A2780	BROAD INSTITUTE	public	sra,bam	ncbi,s3,gs	s3.us-east-1,ncbi.public,gs.US	carcinoma (adenocarcinoma)	primary	African_american	SRX5415031	Illumina HiSeq 2500	cell line	RNASeq-A2780_OVARY	PAIRED	cDNA	TRANSCRIPTOMIC	Homo sapiens	ILLUMINA	2019-03-27T00:00:00Z	A2780_OVARY	cell culture	female	SRP186687	ovary
SRR8616020	54	RNA-Seq	GCA_000001405.13	202	15501388292	ATCC:A-375	PRJNA523380	SAMN10988347	Human	7802508320	A-375	BROAD INSTITUTE	public	bam,sra	gs,s3,ncbi	ncbi.public,s3.us-east-1,gs.US	malignant_melanoma	primary	Caucasian	SRX5415030	Illumina HiSeq 2500	cell line	RNASeq-A375_SKIN	PAIRED	cDNA	TRANSCRIPTOMIC	Homo sapiens	ILLUMINA	2019-03-27T00:00:00Z	A375_SKIN	cell culture	female	SRP186687	skin
SRR8616021	NA	RNA-Seq	GCA_000001405.13	202	18516880248	HSRRB	PRJNA523380	SAMN10987848	Human	9309791317	A3/KAW	BROAD INSTITUTE	public	bam,sra	s3,ncbi,gs	gs.US,s3.us-east-1,ncbi.public	lymphoid_neoplasm (diffuse_large_B_cell_lymphoma)	primary	Asian	SRX5415029	Illumina HiSeq 2500	cell line	RNASeq-A3KAW_HAEMATOPOIETIC_AND_LYMPHOID_TISSUE	PAIRED	cDNA	TRANSCRIPTOMIC	Homo sapiens	ILLUMINA	2019-03-27T00:00:00Z	A3KAW_HAEMATOPOIETIC_AND_LYMPHOID_TISSUE	cell culture	female	SRP186687	haematopoietic_and_lymphoid_tissue
SRR8616022	53	RNA-Seq	GCA_000001405.13	202	10725406140	KCLB:SNU-81	PRJNA523380	SAMN10988062	Human	5137571800	SNU-81	BROAD INSTITUTE	public	bam,sra	ncbi,gs,s3	s3.us-east-1,gs.US,ncbi.public	carcinoma	primary	Asian	SRX5415028	Illumina HiSeq 2500	cell line	RNASeq-SNU81_LARGE_INTESTINE	PAIRED	cDNA	TRANSCRIPTOMIC	Homo sapiens	ILLUMINA	2019-03-27T00:00:00Z	SNU81_LARGE_INTESTINE	cell culture	male	SRP186687	large_intestine
SRR8616023	49	RNA-Seq	GCA_000001405.13	202	24813214996	KCLB:SNU-761	PRJNA523380	SAMN10987730	Human	13353418144	SNU-761	BROAD INSTITUTE	public	sra,bam	ncbi,gs,s3	ncbi.public,s3.us-east-1,gs.US	carcinoma (hepatocellular_carcinoma)	primary	Asian	SRX5415027	Illumina HiSeq 2500	cell line	RNASeq-SNU761_LIVER	PAIRED	cDNA	TRANSCRIPTOMIC	Homo sapiens	ILLUMINA	2019-03-27T00:00:00Z	SNU761_LIVER	cell culture	male	SRP186687	liver
SRR8616024	48	RNA-Seq	GCA_000001405.13	202	20956164780	KCLB:SNU-61	PRJNA523380	SAMN10987731	Human	11287947060	SNU-61	BROAD INSTITUTE	public	bam,sra	ncbi,gs,s3	gs.US,ncbi.public,s3.us-east-1	carcinoma	primary	Asian	SRX5415026	Illumina HiSeq 2500	cell line	RNASeq-SNU61_LARGE_INTESTINE	PAIRED	cDNA	TRANSCRIPTOMIC	Homo sapiens	ILLUMINA	2019-03-27T00:00:00Z	SNU61_LARGE_INTESTINE	cell culture	male	SRP186687	large_intestine
SRR8616025	34	RNA-Seq	GCA_000001405.13	202	20266025518	KCLB:SNU-601	PRJNA523380	SAMN10988047	Human	10958053893	SNU-601	BROAD INSTITUTE	public	sra,bam	gs,ncbi,s3	gs.US,ncbi.public,s3.us-east-1	carcinoma	metastasis	Asian	SRX5415025	Illumina HiSeq 2500	cell line	RNASeq-SNU601_STOMACH	PAIRED	cDNA	TRANSCRIPTOMIC	Homo sapiens	ILLUMINA	2019-03-27T00:00:00Z	SNU601_STOMACH	cell culture	male	SRP186687	stomach
SRR8616026	65	RNA-Seq	GCA_000001405.13	202	20255670594	KCLB:SNU-626	PRJNA523380	SAMN10988090	Human	10877547029	SNU-626	BROAD INSTITUTE	public	bam,sra	ncbi,s3,gs	ncbi.public,s3.us-east-1,gs.US	glioma (astrocytoma_Grade_IV\, glioblastoma_multiforme)	primary	Asian	SRX5415024	Illumina HiSeq 2500	cell line	RNASeq-SNU626_CENTRAL_NERVOUS_SYSTEM	PAIRED	cDNA	TRANSCRIPTOMIC	Homo sapiens	ILLUMINA	2019-03-27T00:00:00Z	SNU626_CENTRAL_NERVOUS_SYSTEM	cell culture	male	SRP186687	central_nervous_system
SRR8616027	59	RNA-Seq	GCA_000001405.13	202	23536643070	KCLB:SNU-620	PRJNA523380	SAMN10987759	Human	12632036835	SNU-620	BROAD INSTITUTE	public	sra,bam	s3,ncbi,gs	gs.US,ncbi.public,s3.us-east-1	carcinoma	metastasis	Asian	SRX5415023	Illumina HiSeq 2500	cell line	RNASeq-SNU620_STOMACH	PAIRED	cDNA	TRANSCRIPTOMIC	Homo sapiens	ILLUMINA	2019-03-27T00:00:00Z	SNU620_STOMACH	cell culture	female	SRP186687	stomach
SRR8616028	61	RNA-Seq	GCA_000001405.13	202	14869987600	ATCC:RPMI 8226	PRJNA523380	SAMN10988318	Human	7541905801	RPMI 8226	BROAD INSTITUTE	public	bam,sra	s3,ncbi,gs	ncbi.public,s3.us-east-1,gs.US	lymphoid_neoplasm (plasma_cell_myeloma)	primary	African_american	SRX5415022	Illumina HiSeq 2500	cell line	RNASeq-RPMI8226_HAEMATOPOIETIC_AND_LYMPHOID_TISSUE	PAIRED	cDNA	TRANSCRIPTOMIC	Homo sapiens	ILLUMINA	2019-03-27T00:00:00Z	RPMI8226_HAEMATOPOIETIC_AND_LYMPHOID_TISSUE	cell culture	male	SRP186687	haematopoietic_and_lymphoid_tissue
SRR8616029	63	RNA-Seq	GCA_000001405.13	202	20186745164	KCLB:SNU-668	PRJNA523380	SAMN10988049	Human	10861296119	SNU-668	BROAD INSTITUTE	public	bam,sra	s3,gs,ncbi	ncbi.public,gs.US,s3.us-east-1	carcinoma (signet_ring_adenocarcinoma)	metastasis	Asian	SRX5415021	Illumina HiSeq 2500	cell line	RNASeq-SNU668_STOMACH	PAIRED	cDNA	TRANSCRIPTOMIC	Homo sapiens	ILLUMINA	2019-03-27T00:00:00Z	SNU668_STOMACH	cell culture	male	SRP186687	stomach
SRR8616030	40	RNA-Seq	GCA_000001405.13	202	19825459276	KCLB:SNU-738	PRJNA523380	SAMN10988089	Human	10664461016	SNU-738	BROAD INSTITUTE	public	bam,sra	gs,s3,ncbi	gs.US,ncbi.public,s3.us-east-1	glioma (oligodendroglioma)	primary	Asian	SRX5415020	Illumina HiSeq 2500	cell line	RNASeq-SNU738_CENTRAL_NERVOUS_SYSTEM	PAIRED	cDNA	TRANSCRIPTOMIC	Homo sapiens	ILLUMINA	2019-03-27T00:00:00Z	SNU738_CENTRAL_NERVOUS_SYSTEM	cell culture	male	SRP186687	central_nervous_system
SRR8616032	44	RNA-Seq	GCA_000001405.13	202	11213881530	NIBRI	PRJNA523380	SAMN10988348	Human	5637599883	HT-29	BROAD INSTITUTE	public	bam,sra	ncbi,s3,gs	ncbi.public,gs.US,s3.us-east-1	carcinoma (adenocarcinoma)	primary	Caucasian	SRX5415018	Illumina HiSeq 2500	cell line	RNASeq-HT29_LARGE_INTESTINE	PAIRED	cDNA	TRANSCRIPTOMIC	Homo sapiens	ILLUMINA	2019-03-27T00:00:00Z	HT29_LARGE_INTESTINE	cell culture	female	SRP186687	large_intestine
SRR8616033	NA	RNA-Seq	GCA_000001405.13	202	16094737436	ECACC:HT55	PRJNA523380	SAMN10988014	Human	8619194253	HT55	BROAD INSTITUTE	public	bam,sra	ncbi,s3,gs	gs.US,ncbi.public,s3.us-east-1	carcinoma (adenocarcinoma)	primary	Caucasian	SRX5415017	Illumina HiSeq 2500	cell line	RNASeq-HT55_LARGE_INTESTINE	PAIRED	cDNA	TRANSCRIPTOMIC	Homo sapiens	ILLUMINA	2019-03-27T00:00:00Z	HT55_LARGE_INTESTINE	cell culture	NA	SRP186687	large_intestine
SRR8616034	49	RNA-Seq	GCA_000001405.13	202	15523493354	DSMZ:KYSE-150	PRJNA523380	SAMN10988383	Human	7755289436	KYSE-150	BROAD INSTITUTE	public	sra,bam	gs,ncbi,s3	s3.us-east-1,gs.US,ncbi.public	carcinoma (squamous_cell_carcinoma)	primary	Asian	SRX5415016	Illumina HiSeq 2500	cell line	RNASeq-KYSE150_OESOPHAGUS	PAIRED	cDNA	TRANSCRIPTOMIC	Homo sapiens	ILLUMINA	2019-03-27T00:00:00Z	KYSE150_OESOPHAGUS	cell culture	female	SRP186687	oesophagus
SRR8616035	54	RNA-Seq	GCA_000001405.13	202	14866196060	DSMZ:KYSE-140	PRJNA523380	SAMN10987809	Human	6986784463	KYSE-140	BROAD INSTITUTE	public	bam,sra	gs,s3,ncbi	gs.US,ncbi.public,s3.us-east-1	carcinoma (squamous_cell_carcinoma)	primary	Asian	SRX5415015	Illumina HiSeq 2500	cell line	RNASeq-KYSE140_OESOPHAGUS	PAIRED	cDNA	TRANSCRIPTOMIC	Homo sapiens	ILLUMINA	2019-03-27T00:00:00Z	KYSE140_OESOPHAGUS	cell culture	male	SRP186687	oesophagus
SRR8616036	79	RNA-Seq	GCA_000001405.13	202	15027301564	DSMZ:KYSE-270	PRJNA523380	SAMN10987933	Human	7120352253	KYSE-270	BROAD INSTITUTE	public	bam,sra	gs,ncbi,s3	gs.US,ncbi.public,s3.us-east-1	carcinoma (squamous_cell_carcinoma)	primary	Asian	SRX5415014	Illumina HiSeq 2500	cell line	RNASeq-KYSE270_OESOPHAGUS	PAIRED	cDNA	TRANSCRIPTOMIC	Homo sapiens	ILLUMINA	2019-03-27T00:00:00Z	KYSE270_OESOPHAGUS	cell culture	male	SRP186687	oesophagus
SRR8616037	53	RNA-Seq	GCA_000001405.13	202	20177635166	DSMZ:KYSE-180	PRJNA523380	SAMN10987810	Human	10008171297	KYSE-180	BROAD INSTITUTE	public	sra,bam	s3,gs,ncbi	s3.us-east-1,gs.US,ncbi.public	carcinoma (squamous_cell_carcinoma)	primary	Asian	SRX5415013	Illumina HiSeq 2500	cell line	RNASeq-KYSE180_OESOPHAGUS	PAIRED	cDNA	TRANSCRIPTOMIC	Homo sapiens	ILLUMINA	2019-03-27T00:00:00Z	KYSE180_OESOPHAGUS	cell culture	male	SRP186687	oesophagus
SRR8616038	51	RNA-Seq	GCA_000001405.13	202	13880383742	DSMZ:KYSE-410	PRJNA523380	SAMN10987801	Human	6929705943	KYSE-410	BROAD INSTITUTE	public	sra,bam	s3,gs,ncbi	ncbi.public,s3.us-east-1,gs.US	carcinoma (squamous_cell_carcinoma)	primary	Asian	SRX5415012	Illumina HiSeq 2500	cell line	RNASeq-KYSE410_OESOPHAGUS	PAIRED	cDNA	TRANSCRIPTOMIC	Homo sapiens	ILLUMINA	2019-03-27T00:00:00Z	KYSE410_OESOPHAGUS	cell culture	male	SRP186687	oesophagus
SRR8616039	64	RNA-Seq	GCA_000001405.13	202	17820380612	GNF	PRJNA523380	SAMN10988382	Human	8953656099	KYSE-30	BROAD INSTITUTE	public	bam,sra	ncbi,s3,gs	ncbi.public,gs.US,s3.us-east-1	carcinoma (squamous_cell_carcinoma)	primary	Asian	SRX5415011	Illumina HiSeq 2500	cell line	RNASeq-KYSE30_OESOPHAGUS	PAIRED	cDNA	TRANSCRIPTOMIC	Homo sapiens	ILLUMINA	2019-03-27T00:00:00Z	KYSE30_OESOPHAGUS	cell culture	male	SRP186687	oesophagus
SRR8616040	69	RNA-Seq	GCA_000001405.13	202	18313477964	HSSRB	PRJNA523380	SAMN10987832	Human	8993011924	HSC-2	BROAD INSTITUTE	public	bam,sra	ncbi,gs,s3	ncbi.public,s3.us-east-1,gs.US	carcinoma (squamous_cell_carcinoma)	primary	Asian	SRX5415010	Illumina HiSeq 2500	cell line	RNASeq-HSC2_UPPER_AERODIGESTIVE_TRACT	PAIRED	cDNA	TRANSCRIPTOMIC	Homo sapiens	ILLUMINA	2019-03-27T00:00:00Z	HSC2_UPPER_AERODIGESTIVE_TRACT	cell culture	male	SRP186687	upper_aerodigestive_tract
SRR8616042	64	RNA-Seq	GCA_000001405.13	202	17579401884	HSSRB	PRJNA523380	SAMN10987856	Human	8662038906	HSC-4	BROAD INSTITUTE	public	bam,sra	s3,gs,ncbi	ncbi.public,s3.us-east-1,gs.US	carcinoma (squamous_cell_carcinoma)	primary	Asian	SRX5415008	Illumina HiSeq 2500	cell line	RNASeq-HSC4_UPPER_AERODIGESTIVE_TRACT	PAIRED	cDNA	TRANSCRIPTOMIC	Homo sapiens	ILLUMINA	2019-03-27T00:00:00Z	HSC4_UPPER_AERODIGESTIVE_TRACT	cell culture	male	SRP186687	upper_aerodigestive_tract
SRR8616043	35	RNA-Seq	GCA_000001405.13	202	19736533422	ATCC:HT-1080	PRJNA523380	SAMN10987635	Human	9664565330	HT-1080	BROAD INSTITUTE	public	bam,sra	ncbi,gs,s3	s3.us-east-1,ncbi.public,gs.US	fibrosarcoma	metastasis	Caucasian	SRX5415007	Illumina HiSeq 2500	cell line	RNASeq-HT1080_SOFT_TISSUE	PAIRED	cDNA	TRANSCRIPTOMIC	Homo sapiens	ILLUMINA	2019-03-27T00:00:00Z	HT1080_SOFT_TISSUE	cell culture	male	SRP186687	soft_tissue
SRR8616044	NA	RNA-Seq	GCA_000001405.13	202	35147037066	ECACC:HT115	PRJNA523380	SAMN10987744	Human	18766887560	HT115	BROAD INSTITUTE	public	bam,sra	ncbi,s3,gs	gs.US,s3.us-east-1,ncbi.public	carcinoma	primary	Caucasian	SRX5415006	Illumina HiSeq 2500	cell line	RNASeq-HT115_LARGE_INTESTINE	PAIRED	cDNA	TRANSCRIPTOMIC	Homo sapiens	ILLUMINA	2019-03-27T00:00:00Z	HT115_LARGE_INTESTINE	cell culture	NA	SRP186687	large_intestine
SRR8616045	44	RNA-Seq	GCA_000001405.13	202	17711209914	NIBRI	PRJNA523380	SAMN10988033	Human	9182144969	HT-1197	BROAD INSTITUTE	public	bam,sra	ncbi,s3,gs	ncbi.public,gs.US,s3.us-east-1	carcinoma	primary	Caucasian	SRX5415005	Illumina HiSeq 2500	cell line	RNASeq-HT1197_URINARY_TRACT	PAIRED	cDNA	TRANSCRIPTOMIC	Homo sapiens	ILLUMINA	2019-03-27T00:00:00Z	HT1197_URINARY_TRACT	cell culture	male	SRP186687	urinary_tract
SRR8616046	58	RNA-Seq	GCA_000001405.13	202	18045609198	NA	PRJNA523380	SAMN10988225	Human	8846405581	HT-1376	BROAD INSTITUTE	public	sra,bam	gs,s3,ncbi	ncbi.public,s3.us-east-1,gs.US	carcinoma (transitional_cell_carcinoma)	primary	Caucasian	SRX5415004	Illumina HiSeq 2500	cell line	RNASeq-HT1376_URINARY_TRACT	PAIRED	cDNA	TRANSCRIPTOMIC	Homo sapiens	ILLUMINA	2019-03-27T00:00:00Z	HT1376_URINARY_TRACT	cell culture	female	SRP186687	urinary_tract
SRR8616047	29	RNA-Seq	GCA_000001405.13	202	14527547100	NA	PRJNA523380	SAMN10988126	Human	7114673951	HT-144	BROAD INSTITUTE	public	sra,bam	s3,ncbi,gs	ncbi.public,gs.US,s3.us-east-1	malignant_melanoma	metastasis	Caucasian	SRX5415003	Illumina HiSeq 2500	cell line	RNASeq-HT144_SKIN	PAIRED	cDNA	TRANSCRIPTOMIC	Homo sapiens	ILLUMINA	2019-03-27T00:00:00Z	HT144_SKIN	cell culture	male	SRP186687	skin
SRR8616049	67	RNA-Seq	GCA_000001405.13	202	21609774160	ATCC:SK-MEL-24	PRJNA523380	SAMN10988223	Human	11579815310	SK-MEL-24	BROAD INSTITUTE	public	sra,bam	gs,s3,ncbi	ncbi.public,s3.us-east-1,gs.US	malignant_melanoma	metastasis	Caucasian	SRX5415001	Illumina HiSeq 2500	cell line	RNASeq-SKMEL24_SKIN	PAIRED	cDNA	TRANSCRIPTOMIC	Homo sapiens	ILLUMINA	2019-03-27T00:00:00Z	SKMEL24_SKIN	cell culture	male	SRP186687	skin
SRR8616050	60	RNA-Seq	GCA_000001405.13	202	27146606482	ATCC:SK-LU-1	PRJNA523380	SAMN10987792	Human	15316866447	SK-LU-1	BROAD INSTITUTE	public	bam,sra	gs,s3,ncbi	ncbi.public,s3.us-east-1,gs.US	carcinoma (adenocarcinoma)	primary	Caucasian	SRX5415000	Illumina HiSeq 2500	cell line	RNASeq-SKLU1_LUNG	PAIRED	cDNA	TRANSCRIPTOMIC	Homo sapiens	ILLUMINA	2019-03-27T00:00:00Z	SKLU1_LUNG	cell culture	female	SRP186687	lung
SRR8616051	76	RNA-Seq	GCA_000001405.13	202	21712604280	HSRRB	PRJNA523380	SAMN10988125	Human	11744726525	SKM-1	BROAD INSTITUTE	public	sra,bam	ncbi,s3,gs	gs.US,ncbi.public,s3.us-east-1	haematopoietic_neoplasm (acute_myeloid_leukaemia\, M5)	primary	Asian	SRX5414999	Illumina HiSeq 2500	cell line	RNASeq-SKM1_HAEMATOPOIETIC_AND_LYMPHOID_TISSUE	PAIRED	cDNA	TRANSCRIPTOMIC	Homo sapiens	ILLUMINA	2019-03-27T00:00:00Z	SKM1_HAEMATOPOIETIC_AND_LYMPHOID_TISSUE	cell culture	male	SRP186687	haematopoietic_and_lymphoid_tissue
SRR8616052	NA	RNA-Seq	GCA_000001405.13	202	18692322702	ATCC:SK-MEL-31	PRJNA523380	SAMN10988127	Human	10039501417	SK-MEL-31	BROAD INSTITUTE	public	sra,bam	ncbi,gs,s3	s3.us-east-1,ncbi.public,gs.US	malignant_melanoma	primary	Caucasian	SRX5414998	Illumina HiSeq 2500	cell line	RNASeq-SKMEL31_SKIN	PAIRED	cDNA	TRANSCRIPTOMIC	Homo sapiens	ILLUMINA	2019-03-27T00:00:00Z	SKMEL31_SKIN	cell culture	female	SRP186687	skin
SRR8616053	42	RNA-Seq	GCA_000001405.13	202	19847927332	NA	PRJNA523380	SAMN10988234	Human	10691559502	SK-MEL-3	BROAD INSTITUTE	public	bam,sra	s3,gs,ncbi	gs.US,ncbi.public,s3.us-east-1	malignant_melanoma	metastasis	Caucasian	SRX5414997	Illumina HiSeq 2500	cell line	RNASeq-SKMEL3_SKIN	PAIRED	cDNA	TRANSCRIPTOMIC	Homo sapiens	ILLUMINA	2019-03-27T00:00:00Z	SKMEL3_SKIN	cell culture	female	SRP186687	skin
SRR8616054	51	RNA-Seq	GCA_000001405.13	202	16396453524	NIBRI	PRJNA523380	SAMN10987689	Human	8813089115	SK-MEL-28	BROAD INSTITUTE	public	bam,sra	gs,ncbi,s3	ncbi.public,s3.us-east-1,gs.US	malignant_melanoma	primary	Caucasian	SRX5414996	Illumina HiSeq 2500	cell line	RNASeq-SKMEL28_SKIN	PAIRED	cDNA	TRANSCRIPTOMIC	Homo sapiens	ILLUMINA	2019-03-27T00:00:00Z	SKMEL28_SKIN	cell culture	male	SRP186687	skin
SRR8616055	67	RNA-Seq	GCA_000001405.13	202	15710119336	DSMZ:SK-MEL-30	PRJNA523380	SAMN10988313	Human	7893236917	SK-MEL-30	BROAD INSTITUTE	public	bam,sra	ncbi,s3,gs	ncbi.public,gs.US,s3.us-east-1	malignant_melanoma	metastasis	Caucasian	SRX5414995	Illumina HiSeq 2500	cell line	RNASeq-SKMEL30_SKIN	PAIRED	cDNA	TRANSCRIPTOMIC	Homo sapiens	ILLUMINA	2019-03-27T00:00:00Z	SKMEL30_SKIN	cell culture	male	SRP186687	skin
SRR8616056	24	RNA-Seq	GCA_000001405.13	202	17381681860	NIBRI	PRJNA523380	SAMN10988351	Human	8724069198	SK-MEL-5	BROAD INSTITUTE	public	bam,sra	gs,ncbi,s3	gs.US,s3.us-east-1,ncbi.public	malignant_melanoma	metastasis	Caucasian	SRX5414994	Illumina HiSeq 2500	cell line	RNASeq-SKMEL5_SKIN	PAIRED	cDNA	TRANSCRIPTOMIC	Homo sapiens	ILLUMINA	2019-03-27T00:00:00Z	SKMEL5_SKIN	cell culture	female	SRP186687	skin
SRR8616057	65	RNA-Seq	GCA_000001405.13	202	16225580916	NA	PRJNA523380	SAMN10987781	Human	8148855351	SK-MES-1	BROAD INSTITUTE	public	bam,sra	s3,ncbi,gs	s3.us-east-1,gs.US,ncbi.public	carcinoma (squamous_cell_carcinoma)	metastasis	Caucasian	SRX5414993	Illumina HiSeq 2500	cell line	RNASeq-SKMES1_LUNG	PAIRED	cDNA	TRANSCRIPTOMIC	Homo sapiens	ILLUMINA	2019-03-27T00:00:00Z	SKMES1_LUNG	cell culture	male	SRP186687	lung
SRR8616058	51	RNA-Seq	GCA_000001405.13	202	11412012624	NIBRI	PRJNA523380	SAMN10988328	Human	5360345364	SW403	BROAD INSTITUTE	public	bam,sra	s3,gs,ncbi	ncbi.public,gs.US,s3.us-east-1	carcinoma (adenocarcinoma)	primary	Caucasian	SRX5414992	Illumina HiSeq 2500	cell line	RNASeq-SW403_LARGE_INTESTINE	PAIRED	cDNA	TRANSCRIPTOMIC	Homo sapiens	ILLUMINA	2019-03-27T00:00:00Z	SW403_LARGE_INTESTINE	cell culture	female	SRP186687	large_intestine
SRR8616059	50	RNA-Seq	GCA_000001405.13	202	16578590662	ATCC:SW480	PRJNA523380	SAMN10987646	Human	8303509529	SW480	BROAD INSTITUTE	public	bam,sra	ncbi,gs,s3	s3.us-east-1,ncbi.public,gs.US	carcinoma (adenocarcinoma)	primary	Caucasian	SRX5414991	Illumina HiSeq 2500	cell line	RNASeq-SW480_LARGE_INTESTINE	PAIRED	cDNA	TRANSCRIPTOMIC	Homo sapiens	ILLUMINA	2019-03-27T00:00:00Z	SW480_LARGE_INTESTINE	cell culture	male	SRP186687	large_intestine
SRR8616060	5	RNA-Seq	GCA_000001405.13	202	19867689194	DSMZ:MOLT-16	PRJNA523380	SAMN10988570	Human	10477705850	MOLT-16	BROAD INSTITUTE	public	bam,sra	gs,ncbi,s3	gs.US,ncbi.public,s3.us-east-1	lymphoid_neoplasm (acute_lymphoblastic_T_cell_leukaemia)	primary	African_american	SRX5414990	Illumina HiSeq 2500	cell line	RNASeq-MOLT16_HAEMATOPOIETIC_AND_LYMPHOID_TISSUE	PAIRED	cDNA	TRANSCRIPTOMIC	Homo sapiens	ILLUMINA	2019-03-27T00:00:00Z	MOLT16_HAEMATOPOIETIC_AND_LYMPHOID_TISSUE	cell culture	female	SRP186687	haematopoietic_and_lymphoid_tissue
SRR8616061	2	RNA-Seq	GCA_000001405.13	202	22945712472	DSMZ:MOLT-13	PRJNA523380	SAMN10988433	Human	12328353314	MOLT-13	BROAD INSTITUTE	public	sra,bam	gs,ncbi,s3	gs.US,ncbi.public,s3.us-east-1	lymphoid_neoplasm (acute_lymphoblastic_T_cell_leukaemia\, L2)	primary	Caucasian	SRX5414989	Illumina HiSeq 2500	cell line	RNASeq-MOLT13_HAEMATOPOIETIC_AND_LYMPHOID_TISSUE	PAIRED	cDNA	TRANSCRIPTOMIC	Homo sapiens	ILLUMINA	2019-03-27T00:00:00Z	MOLT13_HAEMATOPOIETIC_AND_LYMPHOID_TISSUE	cell culture	female	SRP186687	haematopoietic_and_lymphoid_tissue
SRR8616062	58	RNA-Seq	GCA_000001405.13	202	24839906872	ATCC:NCI-H1623	PRJNA523380	SAMN10988155	Human	13114762502	NCI-H1623	BROAD INSTITUTE	public	bam,sra	gs,ncbi,s3	ncbi.public,gs.US,s3.us-east-1	carcinoma (adenocarcinoma)	metastasis	Caucasian	SRX5414988	Illumina HiSeq 2500	cell line	RNASeq-NCIH1623_LUNG	PAIRED	cDNA	TRANSCRIPTOMIC	Homo sapiens	ILLUMINA	2019-03-27T00:00:00Z	NCIH1623_LUNG	cell culture	male	SRP186687	lung
SRR8616063	44	RNA-Seq	GCA_000001405.13	202	21974933398	DSMZ:MOLM-6	PRJNA523380	SAMN10988475	Human	11659383203	MOLM-6	BROAD INSTITUTE	public	sra,bam	ncbi,gs,s3	ncbi.public,gs.US,s3.us-east-1	haematopoietic_neoplasm (blast_phase_chronic_myeloid_leukaemia)	primary	Asian	SRX5414987	Illumina HiSeq 2500	cell line	RNASeq-MOLM6_HAEMATOPOIETIC_AND_LYMPHOID_TISSUE	PAIRED	cDNA	TRANSCRIPTOMIC	Homo sapiens	ILLUMINA	2019-03-27T00:00:00Z	MOLM6_HAEMATOPOIETIC_AND_LYMPHOID_TISSUE	cell culture	male	SRP186687	haematopoietic_and_lymphoid_tissue
SRR8616064	77	RNA-Seq	GCA_000001405.13	202	22488916338	DSMZ:MOLM-16	PRJNA523380	SAMN10989567	Human	11826004476	MOLM-16	BROAD INSTITUTE	public	bam,sra	s3,gs,ncbi	s3.us-east-1,ncbi.public,gs.US	haematopoietic_neoplasm (acute_myeloid_leukaemia\, M0)	primary	Asian	SRX5414986	Illumina HiSeq 2500	cell line	RNASeq-MOLM16_HAEMATOPOIETIC_AND_LYMPHOID_TISSUE	PAIRED	cDNA	TRANSCRIPTOMIC	Homo sapiens	ILLUMINA	2019-03-27T00:00:00Z	MOLM16_HAEMATOPOIETIC_AND_LYMPHOID_TISSUE	cell culture	female	SRP186687	haematopoietic_and_lymphoid_tissue
SRR8616065	52	RNA-Seq	GCA_000001405.13	202	22597498206	DSMZ:MOLP-8	PRJNA523380	SAMN10989574	Human	12009186814	MOLP-8	BROAD INSTITUTE	public	sra,bam	ncbi,s3,gs	s3.us-east-1,gs.US,ncbi.public	lymphoid_neoplasm (plasma_cell_myeloma)	primary	Asian	SRX5414985	Illumina HiSeq 2500	cell line	RNASeq-MOLP8_HAEMATOPOIETIC_AND_LYMPHOID_TISSUE	PAIRED	cDNA	TRANSCRIPTOMIC	Homo sapiens	ILLUMINA	2019-03-27T00:00:00Z	MOLP8_HAEMATOPOIETIC_AND_LYMPHOID_TISSUE	cell culture	male	SRP186687	haematopoietic_and_lymphoid_tissue
SRR8616066	55	RNA-Seq	GCA_000001405.13	202	19545823404	DSMZ:MOLP-2	PRJNA523380	SAMN10988424	Human	10769932167	MOLP-2	BROAD INSTITUTE	public	sra,bam	gs,s3,ncbi	gs.US,ncbi.public,s3.us-east-1	lymphoid_neoplasm (plasma_cell_myeloma)	primary	Asian	SRX5414984	Illumina HiSeq 2500	cell line	RNASeq-MOLP2_HAEMATOPOIETIC_AND_LYMPHOID_TISSUE	PAIRED	cDNA	TRANSCRIPTOMIC	Homo sapiens	ILLUMINA	2019-03-27T00:00:00Z	MOLP2_HAEMATOPOIETIC_AND_LYMPHOID_TISSUE	cell culture	male	SRP186687	haematopoietic_and_lymphoid_tissue
SRR8616067	NA	RNA-Seq	GCA_000001405.13	202	22211237644	DSMZ:ML-1	PRJNA523380	SAMN10989572	Human	11800140256	ML-1	BROAD INSTITUTE	public	sra,bam	s3,ncbi,gs	s3.us-east-1,gs.US,ncbi.public	carcinoma (follicular_carcinoma)	primary	Caucasian	SRX5414983	Illumina HiSeq 2500	cell line	RNASeq-ML1_THYROID	PAIRED	cDNA	TRANSCRIPTOMIC	Homo sapiens	ILLUMINA	2019-03-27T00:00:00Z	ML1_THYROID	cell culture	NA	SRP186687	thyroid
SRR8616068	39	RNA-Seq	GCA_000001405.13	202	14555273216	GNF	PRJNA523380	SAMN10988431	Human	7250018791	MKN7	BROAD INSTITUTE	public	bam,sra	gs,s3,ncbi	s3.us-east-1,gs.US,ncbi.public	carcinoma (tubular_adenocarcinoma)	metastasis	Asian	SRX5414982	Illumina HiSeq 2500	cell line	RNASeq-MKN7_STOMACH	PAIRED	cDNA	TRANSCRIPTOMIC	Homo sapiens	ILLUMINA	2019-03-27T00:00:00Z	MKN7_STOMACH	cell culture	male	SRP186687	stomach
SRR8616069	20	RNA-Seq	GCA_000001405.13	202	14185006610	DSMZ:MOLM-13	PRJNA523380	SAMN10988379	Human	7147629597	MOLM-13	BROAD INSTITUTE	public	sra,bam	s3,ncbi,gs	gs.US,ncbi.public,s3.us-east-1	haematopoietic_neoplasm (acute_myeloid_leukaemia\, M5a)	primary	Asian	SRX5414981	Illumina HiSeq 2500	cell line	RNASeq-MOLM13_HAEMATOPOIETIC_AND_LYMPHOID_TISSUE	PAIRED	cDNA	TRANSCRIPTOMIC	Homo sapiens	ILLUMINA	2019-03-27T00:00:00Z	MOLM13_HAEMATOPOIETIC_AND_LYMPHOID_TISSUE	cell culture	male	SRP186687	haematopoietic_and_lymphoid_tissue
SRR8616070	NA	RNA-Seq	GCA_000001405.13	202	18154946546	ACDC LAB	PRJNA523380	SAMN10988254	Human	9036891014	MM1-S	BROAD INSTITUTE	public	bam,sra	s3,gs,ncbi	gs.US,s3.us-east-1,ncbi.public	lymphoid_neoplasm (plasma_cell_myeloma)	primary	African_american	SRX5414980	Illumina HiSeq 2500	cell line	RNASeq-MM1S_HAEMATOPOIETIC_AND_LYMPHOID_TISSUE	PAIRED	cDNA	TRANSCRIPTOMIC	Homo sapiens	ILLUMINA	2019-03-27T00:00:00Z	MM1S_HAEMATOPOIETIC_AND_LYMPHOID_TISSUE	cell culture	NA	SRP186687	haematopoietic_and_lymphoid_tissue
SRR8616071	NA	RNA-Seq	GCA_000001405.13	202	16096241932	HSSRB	PRJNA523380	SAMN10987824	Human	7620611326	KP-N-SI9s	BROAD INSTITUTE	public	bam,sra	s3,gs,ncbi	gs.US,ncbi.public,s3.us-east-1	neuroblastoma	metastasis	Asian	SRX5414979	Illumina HiSeq 2500	cell line	RNASeq-KPNSI9S_AUTONOMIC_GANGLIA	PAIRED	cDNA	TRANSCRIPTOMIC	Homo sapiens	ILLUMINA	2019-03-27T00:00:00Z	KPNSI9S_AUTONOMIC_GANGLIA	cell culture	NA	SRP186687	autonomic_ganglia
SRR8616072	2	RNA-Seq	GCA_000001405.13	202	13736116554	HSSRB	PRJNA523380	SAMN10988113	Human	6467080364	KP-N-YN	BROAD INSTITUTE	public	bam,sra	ncbi,s3,gs	s3.us-east-1,gs.US,ncbi.public	neuroblastoma	metastasis	Asian	SRX5414978	Illumina HiSeq 2500	cell line	RNASeq-KPNYN_AUTONOMIC_GANGLIA	PAIRED	cDNA	TRANSCRIPTOMIC	Homo sapiens	ILLUMINA	2019-03-27T00:00:00Z	KPNYN_AUTONOMIC_GANGLIA	cell culture	male	SRP186687	autonomic_ganglia
SRR8616074	76	RNA-Seq	GCA_000001405.13	202	13434273610	DSMZ:KU-19-19	PRJNA523380	SAMN10988557	Human	6362175701	KU-19-19	BROAD INSTITUTE	public	bam,sra	gs,ncbi,s3	s3.us-east-1,gs.US,ncbi.public	carcinoma (transitional_cell_carcinoma)	primary	Asian	SRX5414976	Illumina HiSeq 2500	cell line	RNASeq-KU1919_URINARY_TRACT	PAIRED	cDNA	TRANSCRIPTOMIC	Homo sapiens	ILLUMINA	2019-03-27T00:00:00Z	KU1919_URINARY_TRACT	cell culture	male	SRP186687	urinary_tract
SRR8616075	50	RNA-Seq	GCA_000001405.13	202	19268410340	NA	PRJNA523380	SAMN10987858	Human	10212429053	KP4	BROAD INSTITUTE	public	bam,sra	gs,s3,ncbi	gs.US,s3.us-east-1,ncbi.public	carcinoma (ductal_carcinoma)	metastasis	Asian	SRX5414975	Illumina HiSeq 2500	cell line	RNASeq-KP4_PANCREAS	PAIRED	cDNA	TRANSCRIPTOMIC	Homo sapiens	ILLUMINA	2019-03-27T00:00:00Z	KP4_PANCREAS	cell culture	male	SRP186687	pancreas
SRR8616077	NA	RNA-Seq	GCA_000001405.13	202	11722901330	NA	PRJNA523380	SAMN10989607	Human	5370445456	KPMRTRY	BROAD INSTITUTE	public	bam,sra	gs,ncbi,s3	s3.us-east-1,gs.US,ncbi.public	NA	NA	NA	SRX5414973	Illumina HiSeq 2500	cell line	RNASeq-KPMRTRY_SOFT_TISSUE	PAIRED	cDNA	TRANSCRIPTOMIC	Homo sapiens	ILLUMINA	2019-03-27T00:00:00Z	KPMRTRY_SOFT_TISSUE	cell culture	NA	SRP186687	soft_tissue
SRR8616079	45	RNA-Seq	GCA_000001405.13	202	23883494644	ECACC:ChaGo-K-1	PRJNA523380	SAMN10987978	Human	13463627073	ChaGo-K-1	BROAD INSTITUTE	public	sra,bam	s3,ncbi,gs	s3.us-east-1,ncbi.public,gs.US	carcinoma	primary	Caucasian	SRX5414971	Illumina HiSeq 2500	cell line	RNASeq-CHAGOK1_LUNG	PAIRED	cDNA	TRANSCRIPTOMIC	Homo sapiens	ILLUMINA	2019-03-27T00:00:00Z	CHAGOK1_LUNG	cell culture	male	SRP186687	lung
SRR8616080	38	RNA-Seq	GCA_000001405.13	202	14293008132	GNF	PRJNA523380	SAMN10988528	Human	6723130104	KU812	BROAD INSTITUTE	public	sra,bam	ncbi,s3,gs	gs.US,s3.us-east-1,ncbi.public	haematopoietic_neoplasm (chronic_myeloid_leukaemia\, Ph_positive)	primary	Asian	SRX5414970	Illumina HiSeq 2500	cell line	RNASeq-KU812_HAEMATOPOIETIC_AND_LYMPHOID_TISSUE	PAIRED	cDNA	TRANSCRIPTOMIC	Homo sapiens	ILLUMINA	2019-03-27T00:00:00Z	KU812_HAEMATOPOIETIC_AND_LYMPHOID_TISSUE	cell culture	male	SRP186687	haematopoietic_and_lymphoid_tissue
SRR8616081	NA	RNA-Seq	GCA_000001405.13	202	15166632882	GNF	PRJNA523380	SAMN10988052	Human	8070717694	KURAMOCHI	BROAD INSTITUTE	public	bam,sra	s3,ncbi,gs	ncbi.public,s3.us-east-1,gs.US	carcinoma (undifferentiated_carcinoma)	metastasis	Asian	SRX5414969	Illumina HiSeq 2500	cell line	RNASeq-KURAMOCHI_OVARY	PAIRED	cDNA	TRANSCRIPTOMIC	Homo sapiens	ILLUMINA	2019-03-27T00:00:00Z	KURAMOCHI_OVARY	cell culture	female	SRP186687	ovary
SRR8616082	NA	RNA-Seq	GCA_000001405.13	202	32805663954	NA	PRJNA523380	SAMN10988423	Human	17495709405	CH-157MN	BROAD INSTITUTE	public	sra,bam	gs,s3,ncbi	ncbi.public,gs.US,s3.us-east-1	meningioma	NA	Caucasian	SRX5414968	Illumina HiSeq 2500	cell line	RNASeq-CH157MN_CENTRAL_NERVOUS_SYSTEM	PAIRED	cDNA	TRANSCRIPTOMIC	Homo sapiens	ILLUMINA	2019-03-27T00:00:00Z	CH157MN_CENTRAL_NERVOUS_SYSTEM	cell culture	NA	SRP186687	central_nervous_system
SRR8616083	NA	RNA-Seq	GCA_000001405.13	202	18650175402	NIBRI	PRJNA523380	SAMN10988326	Human	9184823196	CHP-212	BROAD INSTITUTE	public	bam,sra	s3,gs,ncbi	gs.US,ncbi.public,s3.us-east-1	neuroblastoma	primary	Caucasian	SRX5414967	Illumina HiSeq 2500	cell line	RNASeq-CHP212_AUTONOMIC_GANGLIA	PAIRED	cDNA	TRANSCRIPTOMIC	Homo sapiens	ILLUMINA	2019-03-27T00:00:00Z	CHP212_AUTONOMIC_GANGLIA	cell culture	NA	SRP186687	autonomic_ganglia
SRR8616085	42	RNA-Seq	GCA_000001405.13	202	17989336240	ATCC:TOV-112D	PRJNA523380	SAMN10988342	Human	9010031744	TOV-112D	BROAD INSTITUTE	public	bam,sra	s3,gs,ncbi	s3.us-east-1,gs.US,ncbi.public	carcinoma (endometrioid_carcinoma)	primary	Caucasian	SRX5414965	Illumina HiSeq 2500	cell line	RNASeq-TOV112D_OVARY	PAIRED	cDNA	TRANSCRIPTOMIC	Homo sapiens	ILLUMINA	2019-03-27T00:00:00Z	TOV112D_OVARY	cell culture	female	SRP186687	ovary
SRR8616086	NA	RNA-Seq	GCA_000001405.13	202	17581328964	NA	PRJNA523380	SAMN10989624	Human	9365707976	TM-87;TM87	BROAD INSTITUTE	public	bam,sra	s3,gs,ncbi	s3.us-east-1,gs.US,ncbi.public	NA	NA	NA	SRX5414964	Illumina HiSeq 2500	cell line	RNASeq-TM87_SOFT_TISSUE	PAIRED	cDNA	TRANSCRIPTOMIC	Homo sapiens	ILLUMINA	2019-03-27T00:00:00Z	TM87_SOFT_TISSUE	cell culture	NA	SRP186687	soft_tissue
SRR8616087	29	RNA-Seq	GCA_000001405.13	202	15569564504	GNF	PRJNA523380	SAMN10988143	Human	7622045043	TO 175.T	BROAD INSTITUTE	public	sra,bam	gs,ncbi,s3	ncbi.public,gs.US,s3.us-east-1	lymphoid_neoplasm (Hodgkin_lymphoma)	metastasis	Caucasian	SRX5414963	Illumina HiSeq 2500	cell line	RNASeq-TO175T_FIBROBLAST	PAIRED	cDNA	TRANSCRIPTOMIC	Homo sapiens	ILLUMINA	2019-03-27T00:00:00Z	TO175T_FIBROBLAST	cell culture	male	SRP186687	haematopoietic_and_lymphoid_tissue
SRR8616088	NA	RNA-Seq	GCA_000001405.13	202	15993398682	NA	PRJNA523380	SAMN10988398	Human	8579943658	TIG-3 TD	BROAD INSTITUTE	public	sra,bam	ncbi,s3,gs	s3.us-east-1,ncbi.public,gs.US	other (immortalized_embryonic_fibroblast)	NA	NA	SRX5414962	Illumina HiSeq 2500	cell line	RNASeq-TIG3TD_FIBROBLAST	PAIRED	cDNA	TRANSCRIPTOMIC	Homo sapiens	ILLUMINA	2019-03-27T00:00:00Z	TIG3TD_FIBROBLAST	cell culture	NA	SRP186687	lung
SRR8616089	NA	RNA-Seq	GCA_000001405.13	202	17987292000	RIKEN:TM-31	PRJNA523380	SAMN10987718	Human	8926882050	TM-31	BROAD INSTITUTE	public	bam,sra	gs,ncbi,s3	s3.us-east-1,gs.US,ncbi.public	glioma (astrocytoma)	primary	Asian	SRX5414961	Illumina HiSeq 2500	cell line	RNASeq-TM31_CENTRAL_NERVOUS_SYSTEM	PAIRED	cDNA	TRANSCRIPTOMIC	Homo sapiens	ILLUMINA	2019-03-27T00:00:00Z	TM31_CENTRAL_NERVOUS_SYSTEM	cell culture	NA	SRP186687	central_nervous_system
SRR8616090	60	RNA-Seq	GCA_000001405.13	202	22289673638	ATCC:SH-4	PRJNA523380	SAMN10987692	Human	11976430993	SH-4	BROAD INSTITUTE	public	bam,sra	gs,ncbi,s3	ncbi.public,s3.us-east-1,gs.US	malignant_melanoma	metastasis	Caucasian	SRX5414960	Illumina HiSeq 2500	cell line	RNASeq-SH4_SKIN	PAIRED	cDNA	TRANSCRIPTOMIC	Homo sapiens	ILLUMINA	2019-03-27T00:00:00Z	SH4_SKIN	cell culture	female	SRP186687	skin
SRR8616091	1	RNA-Seq	GCA_000001405.13	202	16447640526	NIBRI	PRJNA523380	SAMN10987847	Human	8244210823	THP-1	BROAD INSTITUTE	public	bam,sra	gs,s3,ncbi	ncbi.public,gs.US,s3.us-east-1	haematopoietic_neoplasm (acute_myeloid_leukaemia\, M5)	primary	Asian	SRX5414959	Illumina HiSeq 2500	cell line	RNASeq-THP1_HAEMATOPOIETIC_AND_LYMPHOID_TISSUE	PAIRED	cDNA	TRANSCRIPTOMIC	Homo sapiens	ILLUMINA	2019-03-27T00:00:00Z	THP1_HAEMATOPOIETIC_AND_LYMPHOID_TISSUE	cell culture	male	SRP186687	haematopoietic_and_lymphoid_tissue
SRR8616092	74	RNA-Seq	GCA_000001405.13	202	17639694642	RIKEN:TEN	PRJNA523380	SAMN10987928	Human	8779443078	TEN	BROAD INSTITUTE	public	bam,sra	s3,ncbi,gs	gs.US,s3.us-east-1,ncbi.public	carcinoma (clear_cell_carcinoma)	primary	Asian	SRX5414958	Illumina HiSeq 2500	cell line	RNASeq-TEN_ENDOMETRIUM	PAIRED	cDNA	TRANSCRIPTOMIC	Homo sapiens	ILLUMINA	2019-03-27T00:00:00Z	TEN_ENDOMETRIUM	cell culture	female	SRP186687	endometrium
SRR8616093	35	RNA-Seq	GCA_000001405.13	202	20959666046	NIBRI	PRJNA523380	SAMN10988443	Human	10499597600	TF-1	BROAD INSTITUTE	public	bam,sra	gs,s3,ncbi	ncbi.public,s3.us-east-1,gs.US	haematopoietic_neoplasm (acute_myeloid_leukaemia\, M6)	primary	Asian	SRX5414957	Illumina HiSeq 2500	cell line	RNASeq-TF1_HAEMATOPOIETIC_AND_LYMPHOID_TISSUE	PAIRED	cDNA	TRANSCRIPTOMIC	Homo sapiens	ILLUMINA	2019-03-27T00:00:00Z	TF1_HAEMATOPOIETIC_AND_LYMPHOID_TISSUE	cell culture	male	SRP186687	haematopoietic_and_lymphoid_tissue
SRR8616094	45	RNA-Seq	GCA_000001405.13	202	19905324824	HSSRB	PRJNA523380	SAMN10987621	Human	9976280404	RKN	BROAD INSTITUTE	public	sra,bam	gs,ncbi,s3	ncbi.public,gs.US,s3.us-east-1	leiomyosarcoma	primary	Asian	SRX5414956	Illumina HiSeq 2500	cell line	RNASeq-RKN_SOFT_TISSUE	PAIRED	cDNA	TRANSCRIPTOMIC	Homo sapiens	ILLUMINA	2019-03-27T00:00:00Z	RKN_SOFT_TISSUE	cell culture	female	SRP186687	soft_tissue
SRR8616095	25	RNA-Seq	GCA_000001405.13	202	25450044236	NIBRI	PRJNA523380	SAMN10987925	Human	13685194420	SCC-9	BROAD INSTITUTE	public	bam,sra	gs,s3,ncbi	ncbi.public,s3.us-east-1,gs.US	carcinoma (squamous_cell_carcinoma)	primary	Caucasian	SRX5414955	Illumina HiSeq 2500	cell line	RNASeq-SCC9_UPPER_AERODIGESTIVE_TRACT	PAIRED	cDNA	TRANSCRIPTOMIC	Homo sapiens	ILLUMINA	2019-03-27T00:00:00Z	SCC9_UPPER_AERODIGESTIVE_TRACT	cell culture	male	SRP186687	upper_aerodigestive_tract
SRR8616098	55	RNA-Seq	GCA_000001405.13	202	17717619576	NIBRI	PRJNA523380	SAMN10987944	Human	8909928216	SCC-4	BROAD INSTITUTE	public	bam,sra	s3,gs,ncbi	s3.us-east-1,gs.US,ncbi.public	carcinoma (squamous_cell_carcinoma)	primary	Caucasian	SRX5414952	Illumina HiSeq 2500	cell line	RNASeq-SCC4_UPPER_AERODIGESTIVE_TRACT	PAIRED	cDNA	TRANSCRIPTOMIC	Homo sapiens	ILLUMINA	2019-03-27T00:00:00Z	SCC4_UPPER_AERODIGESTIVE_TRACT	cell culture	male	SRP186687	upper_aerodigestive_tract
SRR8616099	58	RNA-Seq	GCA_000001405.13	202	20033895400	ATCC:SCaBER	PRJNA523380	SAMN10988312	Human	10791275967	SCaBER	BROAD INSTITUTE	public	sra,bam	s3,ncbi,gs	gs.US,ncbi.public,s3.us-east-1	carcinoma (transitional_cell_carcinoma)	primary	African_american	SRX5414951	Illumina HiSeq 2500	cell line	RNASeq-SCABER_URINARY_TRACT	PAIRED	cDNA	TRANSCRIPTOMIC	Homo sapiens	ILLUMINA	2019-03-27T00:00:00Z	SCABER_URINARY_TRACT	cell culture	male	SRP186687	urinary_tract
SRR8616100	55	RNA-Seq	GCA_000001405.13	202	21487591834	NIBRI	PRJNA523380	SAMN10988435	Human	11561235362	SCC-15	BROAD INSTITUTE	public	sra,bam	s3,ncbi,gs	s3.us-east-1,ncbi.public,gs.US	carcinoma (squamous_cell_carcinoma)	primary	Caucasian	SRX5414950	Illumina HiSeq 2500	cell line	RNASeq-SCC15_UPPER_AERODIGESTIVE_TRACT	PAIRED	cDNA	TRANSCRIPTOMIC	Homo sapiens	ILLUMINA	2019-03-27T00:00:00Z	SCC15_UPPER_AERODIGESTIVE_TRACT	cell culture	male	SRP186687	upper_aerodigestive_tract
SRR8616101	11	RNA-Seq	GCA_000001405.13	202	20392673458	NIBRI	PRJNA523380	SAMN10987923	Human	10966148717	Saos-2	BROAD INSTITUTE	public	bam,sra	gs,s3,ncbi	gs.US,ncbi.public,s3.us-east-1	osteosarcoma	primary	Caucasian	SRX5414949	Illumina HiSeq 2500	cell line	RNASeq-SAOS2_BONE	PAIRED	cDNA	TRANSCRIPTOMIC	Homo sapiens	ILLUMINA	2019-03-27T00:00:00Z	SAOS2_BONE	cell culture	female	SRP186687	bone
SRR8616102	NA	RNA-Seq	GCA_000001405.13	202	18720291218	HSRRB	PRJNA523380	SAMN10988207	Human	9436894658	SBC-5	BROAD INSTITUTE	public	sra,bam	gs,s3,ncbi	ncbi.public,gs.US,s3.us-east-1	carcinoma (small_cell_carcinoma)	primary	Asian	SRX5414948	Illumina HiSeq 2500	cell line	RNASeq-SBC5_LUNG	PAIRED	cDNA	TRANSCRIPTOMIC	Homo sapiens	ILLUMINA	2019-03-27T00:00:00Z	SBC5_LUNG	cell culture	NA	SRP186687	lung
SRR8616103	69	RNA-Seq	GCA_000001405.13	202	15008180244	RIKEN:LC-1F	PRJNA523380	SAMN10988100	Human	7047992298	LC-1F	BROAD INSTITUTE	public	sra,bam	s3,ncbi,gs	ncbi.public,s3.us-east-1,gs.US	carcinoma (squamous_cell_carcinoma)	primary	Asian	SRX5414947	Illumina HiSeq 2500	cell line	RNASeq-LC1F_LUNG	PAIRED	cDNA	TRANSCRIPTOMIC	Homo sapiens	ILLUMINA	2019-03-27T00:00:00Z	LC1F_LUNG	cell culture	male	SRP186687	lung
SRR8616104	NA	RNA-Seq	GCA_000001405.13	202	14773220914	NA	PRJNA523380	SAMN10988396	Human	7913729143	SALE	BROAD INSTITUTE	public	sra,bam	gs,ncbi,s3	gs.US,ncbi.public,s3.us-east-1	other (immortalized_epithelial)	NA	Caucasian	SRX5414946	Illumina HiSeq 2500	cell line	RNASeq-SALE_LUNG	PAIRED	cDNA	TRANSCRIPTOMIC	Homo sapiens	ILLUMINA	2019-03-27T00:00:00Z	SALE_LUNG	cell culture	NA	SRP186687	lung
SRR8616105	55	RNA-Seq	GCA_000001405.13	202	17110779256	ATCC:NCI-H2342	PRJNA523380	SAMN10987673	Human	8562941252	NCI-H2342	BROAD INSTITUTE	public	sra,bam	gs,s3,ncbi	s3.us-east-1,ncbi.public,gs.US	carcinoma (adenocarcinoma)	primary	Caucasian	SRX5414945	Illumina HiSeq 2500	cell line	RNASeq-NCIH2342_LUNG	PAIRED	cDNA	TRANSCRIPTOMIC	Homo sapiens	ILLUMINA	2019-03-27T00:00:00Z	NCIH2342_LUNG	cell culture	male	SRP186687	lung
SRR8616106	NA	RNA-Seq	GCA_000001405.13	202	16630014206	ATCC:NCI-H2291	PRJNA523380	SAMN10987683	Human	8754745267	NCI-H2291	BROAD INSTITUTE	public	sra,bam	ncbi,s3,gs	s3.us-east-1,ncbi.public,gs.US	carcinoma (adenocarcinoma)	metastasis	Caucasian	SRX5414944	Illumina HiSeq 2500	cell line	RNASeq-NCIH2291_LUNG	PAIRED	cDNA	TRANSCRIPTOMIC	Homo sapiens	ILLUMINA	2019-03-27T00:00:00Z	NCIH2291_LUNG	cell culture	male	SRP186687	lung
SRR8616107	50	RNA-Seq	GCA_000001405.13	202	12785416078	ATCC:NCI-H2171	PRJNA523380	SAMN10988226	Human	6349878650	NCI-H2171	BROAD INSTITUTE	public	sra,bam	ncbi,s3,gs	s3.us-east-1,ncbi.public,gs.US	carcinoma (small_cell_carcinoma)	metastasis	Caucasian	SRX5414943	Illumina HiSeq 2500	cell line	RNASeq-NCIH2171_LUNG	PAIRED	cDNA	TRANSCRIPTOMIC	Homo sapiens	ILLUMINA	2019-03-27T00:00:00Z	NCIH2171_LUNG	cell culture	male	SRP186687	lung
SRR8616108	NA	RNA-Seq	GCA_000001405.13	202	17577709528	NA	PRJNA523380	SAMN10988373	Human	8635996447	NCI-H2170	BROAD INSTITUTE	public	bam,sra	s3,gs,ncbi	gs.US,ncbi.public,s3.us-east-1	carcinoma (squamous_cell_carcinoma)	primary	Caucasian	SRX5414942	Illumina HiSeq 2500	cell line	RNASeq-NCIH2170_LUNG	PAIRED	cDNA	TRANSCRIPTOMIC	Homo sapiens	ILLUMINA	2019-03-27T00:00:00Z	NCIH2170_LUNG	cell culture	male	SRP186687	lung
SRR8616109	67	RNA-Seq	GCA_000001405.13	202	19182667804	ATCC:NCI-H2196	PRJNA523380	SAMN10988344	Human	9447664214	NCI-H2196	BROAD INSTITUTE	public	sra,bam	ncbi,gs,s3	gs.US,ncbi.public,s3.us-east-1	carcinoma (small_cell_carcinoma)	metastasis	Caucasian	SRX5414941	Illumina HiSeq 2500	cell line	RNASeq-NCIH2196_LUNG	PAIRED	cDNA	TRANSCRIPTOMIC	Homo sapiens	ILLUMINA	2019-03-27T00:00:00Z	NCIH2196_LUNG	cell culture	male	SRP186687	lung
SRR8616110	NA	RNA-Seq	GCA_000001405.13	202	22358836418	ATCC:NCI-H2172	PRJNA523380	SAMN10988024	Human	11805145084	NCI-H2172	BROAD INSTITUTE	public	sra,bam	ncbi,s3,gs	ncbi.public,s3.us-east-1,gs.US	carcinoma (non_small_cell_carcinoma)	primary	African_american	SRX5414940	Illumina HiSeq 2500	cell line	RNASeq-NCIH2172_LUNG	PAIRED	cDNA	TRANSCRIPTOMIC	Homo sapiens	ILLUMINA	2019-03-27T00:00:00Z	NCIH2172_LUNG	cell culture	female	SRP186687	lung
SRR8616111	NA	RNA-Seq	GCA_000001405.13	202	21381008756	NA	PRJNA523380	SAMN10987779	Human	11278341998	NCI-H2228	BROAD INSTITUTE	public	bam,sra	ncbi,s3,gs	ncbi.public,gs.US,s3.us-east-1	carcinoma (adenocarcinoma)	primary	Caucasian	SRX5414939	Illumina HiSeq 2500	cell line	RNASeq-NCIH2228_LUNG	PAIRED	cDNA	TRANSCRIPTOMIC	Homo sapiens	ILLUMINA	2019-03-27T00:00:00Z	NCIH2228_LUNG	cell culture	female	SRP186687	lung
SRR8616112	54	RNA-Seq	GCA_000001405.13	202	16271644592	ATCC:NCI-H2227	PRJNA523380	SAMN10987609	Human	8067602683	NCI-H2227	BROAD INSTITUTE	public	sra,bam	gs,ncbi,s3	s3.us-east-1,gs.US,ncbi.public	carcinoma (small_cell_carcinoma)	primary	Caucasian	SRX5414938	Illumina HiSeq 2500	cell line	RNASeq-NCIH2227_LUNG	PAIRED	cDNA	TRANSCRIPTOMIC	Homo sapiens	ILLUMINA	2019-03-27T00:00:00Z	NCIH2227_LUNG	cell culture	male	SRP186687	lung
SRR8616114	NA	RNA-Seq	GCA_000001405.13	202	14877050934	ATCC:NCI-H226	PRJNA523380	SAMN10987668	Human	7482182673	NCI-H226	BROAD INSTITUTE	public	bam,sra	gs,ncbi,s3	ncbi.public,gs.US,s3.us-east-1	carcinoma (squamous_cell_carcinoma)	metastasis	Caucasian	SRX5414936	Illumina HiSeq 2500	cell line	RNASeq-NCIH226_LUNG	PAIRED	cDNA	TRANSCRIPTOMIC	Homo sapiens	ILLUMINA	2019-03-27T00:00:00Z	NCIH226_LUNG	cell culture	male	SRP186687	lung
SRR8616115	61	RNA-Seq	GCA_000001405.13	202	12905034014	DSMZ:LCLC-103H	PRJNA523380	SAMN10988564	Human	6131899346	LCLC-103H	BROAD INSTITUTE	public	sra,bam	ncbi,gs,s3	ncbi.public,s3.us-east-1,gs.US	carcinoma (large_cell_carcinoma)	metastasis	Caucasian	SRX5414935	Illumina HiSeq 2500	cell line	RNASeq-LCLC103H_LUNG	PAIRED	cDNA	TRANSCRIPTOMIC	Homo sapiens	ILLUMINA	2019-03-27T00:00:00Z	LCLC103H_LUNG	cell culture	male	SRP186687	lung
SRR8616116	NA	RNA-Seq	GCA_000001405.13	202	21072270946	ECACC:BICR 6	PRJNA523380	SAMN10987690	Human	11601915332	BICR 6	BROAD INSTITUTE	public	sra,bam	ncbi,gs,s3	gs.US,ncbi.public,s3.us-east-1	carcinoma (squamous_cell_carcinoma)	primary	Caucasian	SRX5414934	Illumina HiSeq 2500	cell line	RNASeq-BICR6_UPPER_AERODIGESTIVE_TRACT	PAIRED	cDNA	TRANSCRIPTOMIC	Homo sapiens	ILLUMINA	2019-03-27T00:00:00Z	BICR6_UPPER_AERODIGESTIVE_TRACT	cell culture	male	SRP186687	upper_aerodigestive_tract
SRR8616117	NA	RNA-Seq	GCA_000001405.13	202	22730381684	ECACC:BICR 56	PRJNA523380	SAMN10987686	Human	12736022919	BICR 56	BROAD INSTITUTE	public	sra,bam	ncbi,s3,gs	gs.US,ncbi.public,s3.us-east-1	carcinoma (squamous_cell_carcinoma)	primary	Caucasian	SRX5414933	Illumina HiSeq 2500	cell line	RNASeq-BICR56_UPPER_AERODIGESTIVE_TRACT	PAIRED	cDNA	TRANSCRIPTOMIC	Homo sapiens	ILLUMINA	2019-03-27T00:00:00Z	BICR56_UPPER_AERODIGESTIVE_TRACT	cell culture	female	SRP186687	upper_aerodigestive_tract
SRR8616118	16	RNA-Seq	GCA_000001405.13	202	21636513102	NIBRI	PRJNA523380	SAMN10988162	Human	12004629076	BL-70	BROAD INSTITUTE	public	bam,sra	ncbi,gs,s3	s3.us-east-1,gs.US,ncbi.public	lymphoid_neoplasm (Burkitt_lymphoma)	primary	Caucasian	SRX5414932	Illumina HiSeq 2500	cell line	RNASeq-BL70_HAEMATOPOIETIC_AND_LYMPHOID_TISSUE	PAIRED	cDNA	TRANSCRIPTOMIC	Homo sapiens	ILLUMINA	2019-03-27T00:00:00Z	BL70_HAEMATOPOIETIC_AND_LYMPHOID_TISSUE	cell culture	male	SRP186687	haematopoietic_and_lymphoid_tissue
SRR8616119	8	RNA-Seq	GCA_000001405.13	202	20342213656	DSMZ:BL-41	PRJNA523380	SAMN10987706	Human	11332858904	BL-41	BROAD INSTITUTE	public	sra,bam	gs,ncbi,s3	gs.US,ncbi.public,s3.us-east-1	lymphoid_neoplasm (Burkitt_lymphoma)	primary	Caucasian	SRX5414931	Illumina HiSeq 2500	cell line	RNASeq-BL41_HAEMATOPOIETIC_AND_LYMPHOID_TISSUE	PAIRED	cDNA	TRANSCRIPTOMIC	Homo sapiens	ILLUMINA	2019-03-27T00:00:00Z	BL41_HAEMATOPOIETIC_AND_LYMPHOID_TISSUE	cell culture	male	SRP186687	haematopoietic_and_lymphoid_tissue
SRR8616120	NA	RNA-Seq	GCA_000001405.13	196	28572663470	ECACC:BICR 18	PRJNA523380	SAMN10987721	Human	17204264056	BICR 18	BROAD INSTITUTE	public	bam,sra	ncbi,s3,gs	gs.US,s3.us-east-1,ncbi.public	carcinoma (squamous_cell_carcinoma)	primary	Caucasian	SRX5414930	Illumina HiSeq 2500	cell line	RNASeq-BICR18_UPPER_AERODIGESTIVE_TRACT	PAIRED	cDNA	TRANSCRIPTOMIC	Homo sapiens	ILLUMINA	2019-03-27T00:00:00Z	BICR18_UPPER_AERODIGESTIVE_TRACT	cell culture	male	SRP186687	upper_aerodigestive_tract
SRR8616121	NA	RNA-Seq	GCA_000001405.13	202	25177447054	ECACC:BICR 16	PRJNA523380	SAMN10987687	Human	13973914629	BICR 16	BROAD INSTITUTE	public	bam,sra	gs,ncbi,s3	ncbi.public,s3.us-east-1,gs.US	carcinoma (squamous_cell_carcinoma)	primary	Caucasian	SRX5414929	Illumina HiSeq 2500	cell line	RNASeq-BICR16_UPPER_AERODIGESTIVE_TRACT	PAIRED	cDNA	TRANSCRIPTOMIC	Homo sapiens	ILLUMINA	2019-03-27T00:00:00Z	BICR16_UPPER_AERODIGESTIVE_TRACT	cell culture	male	SRP186687	upper_aerodigestive_tract
SRR8616122	NA	RNA-Seq	GCA_000001405.13	202	22846181416	ECACC:BICR 31	PRJNA523380	SAMN10987970	Human	12613398020	BICR 31	BROAD INSTITUTE	public	bam,sra	gs,ncbi,s3	ncbi.public,s3.us-east-1,gs.US	carcinoma (squamous_cell_carcinoma)	primary	Caucasian	SRX5414928	Illumina HiSeq 2500	cell line	RNASeq-BICR31_UPPER_AERODIGESTIVE_TRACT	PAIRED	cDNA	TRANSCRIPTOMIC	Homo sapiens	ILLUMINA	2019-03-27T00:00:00Z	BICR31_UPPER_AERODIGESTIVE_TRACT	cell culture	male	SRP186687	upper_aerodigestive_tract
SRR8616123	NA	RNA-Seq	GCA_000001405.13	202	20615451784	ECACC:BICR 22	PRJNA523380	SAMN10987716	Human	11459864925	BICR 22	BROAD INSTITUTE	public	bam,sra	gs,ncbi,s3	ncbi.public,s3.us-east-1,gs.US	carcinoma (squamous_cell_carcinoma)	metastasis	Caucasian	SRX5414927	Illumina HiSeq 2500	cell line	RNASeq-BICR22_UPPER_AERODIGESTIVE_TRACT	PAIRED	cDNA	TRANSCRIPTOMIC	Homo sapiens	ILLUMINA	2019-03-27T00:00:00Z	BICR22_UPPER_AERODIGESTIVE_TRACT	cell culture	male	SRP186687	upper_aerodigestive_tract
SRR8616124	74	RNA-Seq	GCA_000001405.13	202	24271365550	NIBRI	PRJNA523380	SAMN10987894	Human	12947879469	BT-20	BROAD INSTITUTE	public	sra,bam	gs,s3,ncbi	gs.US,s3.us-east-1,ncbi.public	carcinoma (ductal_carcinoma)	primary	Caucasian	SRX5414926	Illumina HiSeq 2500	cell line	RNASeq-BT20_BREAST	PAIRED	cDNA	TRANSCRIPTOMIC	Homo sapiens	ILLUMINA	2019-03-27T00:00:00Z	BT20_BREAST	cell culture	female	SRP186687	breast
SRR8616125	NA	RNA-Seq	GCA_000001405.13	202	17830702610	NA	PRJNA523380	SAMN10989598	Human	9532666888	BT-12	BROAD INSTITUTE	public	bam,sra	gs,s3,ncbi	ncbi.public,gs.US,s3.us-east-1	NA	NA	NA	SRX5414925	Illumina HiSeq 2500	cell line	RNASeq-BT12_SOFT_TISSUE	PAIRED	cDNA	TRANSCRIPTOMIC	Homo sapiens	ILLUMINA	2019-03-27T00:00:00Z	BT12_SOFT_TISSUE	cell culture	NA	SRP186687	soft_tissue
SRR8616126	NA	RNA-Seq	GCA_000001405.13	202	18093286450	NA	PRJNA523380	SAMN10988240	Human	8863956129	HMCB	BROAD INSTITUTE	public	sra,bam	s3,ncbi,gs	ncbi.public,s3.us-east-1,gs.US	malignant_melanoma	primary	Caucasian	SRX5414924	Illumina HiSeq 2500	cell line	RNASeq-HMCB_SKIN	PAIRED	cDNA	TRANSCRIPTOMIC	Homo sapiens	ILLUMINA	2019-03-27T00:00:00Z	HMCB_SKIN	cell culture	NA	SRP186687	skin
SRR8616127	35	RNA-Seq	GCA_000001405.13	202	18518394844	HSSRB	PRJNA523380	SAMN10987868	Human	9149344378	HMC-1-8	BROAD INSTITUTE	public	sra,bam	ncbi,s3,gs	gs.US,s3.us-east-1,ncbi.public	carcinoma	metastasis	Asian	SRX5414923	Illumina HiSeq 2500	cell line	RNASeq-HMC18_BREAST	PAIRED	cDNA	TRANSCRIPTOMIC	Homo sapiens	ILLUMINA	2019-03-27T00:00:00Z	HMC18_BREAST	cell culture	female	SRP186687	breast
SRR8616128	NA	RNA-Seq	GCA_000001405.13	202	18755762216	RIKEN:TE-9	PRJNA523380	SAMN10987930	Human	9471870654	TE-9	BROAD INSTITUTE	public	sra,bam	gs,ncbi,s3	gs.US,s3.us-east-1,ncbi.public	carcinoma (squamous_cell_carcinoma)	primary	Asian	SRX5414922	Illumina HiSeq 2500	cell line	RNASeq-TE9_OESOPHAGUS	PAIRED	cDNA	TRANSCRIPTOMIC	Homo sapiens	ILLUMINA	2019-03-27T00:00:00Z	TE9_OESOPHAGUS	cell culture	male	SRP186687	oesophagus
SRR8616129	15	RNA-Seq	GCA_000001405.13	202	16840035222	NIBRI/ATCC	PRJNA523380	SAMN10988201	Human	8426331237	Hep G2	BROAD INSTITUTE	public	sra,bam	ncbi,s3,gs	s3.us-east-1,gs.US,ncbi.public	carcinoma (hepatocellular_carcinoma)	primary	Caucasian	SRX5414921	Illumina HiSeq 2500	cell line	RNASeq-HEPG2_LIVER	PAIRED	cDNA	TRANSCRIPTOMIC	Homo sapiens	ILLUMINA	2019-03-27T00:00:00Z	HEPG2_LIVER	cell culture	male	SRP186687	liver
SRR8616130	8	RNA-Seq	GCA_000001405.13	202	16430216410	NA	PRJNA523380	SAMN10988098	Human	8101144295	Hep 3B2.1-7	BROAD INSTITUTE	public	bam,sra	gs,ncbi,s3	s3.us-east-1,gs.US,ncbi.public	carcinoma (hepatocellular_carcinoma)	primary	African_american	SRX5414920	Illumina HiSeq 2500	cell line	RNASeq-HEP3B217_LIVER	PAIRED	cDNA	TRANSCRIPTOMIC	Homo sapiens	ILLUMINA	2019-03-27T00:00:00Z	HEP3B217_LIVER	cell culture	male	SRP186687	liver
SRR8616131	NA	RNA-Seq	GCA_000001405.13	202	19086543680	GNF	PRJNA523380	SAMN10987863	Human	9552835635	HGC-27	BROAD INSTITUTE	public	sra,bam	ncbi,s3,gs	ncbi.public,gs.US,s3.us-east-1	carcinoma (undifferentiated_adenocarcinoma)	metastasis	Asian	SRX5414919	Illumina HiSeq 2500	cell line	RNASeq-HGC27_STOMACH	PAIRED	cDNA	TRANSCRIPTOMIC	Homo sapiens	ILLUMINA	2019-03-27T00:00:00Z	HGC27_STOMACH	cell culture	NA	SRP186687	stomach
SRR8616132	NA	RNA-Seq	GCA_000001405.13	202	15648988278	NIBRI	PRJNA523380	SAMN10988247	Human	8207568510	Hey-A8	BROAD INSTITUTE	public	sra,bam	s3,ncbi,gs	ncbi.public,gs.US,s3.us-east-1	carcinoma	metastasis	Caucasian	SRX5414918	Illumina HiSeq 2500	cell line	RNASeq-HEYA8_OVARY	PAIRED	cDNA	TRANSCRIPTOMIC	Homo sapiens	ILLUMINA	2019-03-27T00:00:00Z	HEYA8_OVARY	cell culture	female	SRP186687	ovary
SRR8616133	35	RNA-Seq	GCA_000001405.13	202	16308203360	ATCC:HL-60	PRJNA523380	SAMN10988245	Human	8683852259	HL-60	BROAD INSTITUTE	public	sra,bam	gs,ncbi,s3	ncbi.public,gs.US,s3.us-east-1	haematopoietic_neoplasm (acute_myeloid_leukaemia\, M2)	primary	Caucasian	SRX5414917	Illumina HiSeq 2500	cell line	RNASeq-HL60_HAEMATOPOIETIC_AND_LYMPHOID_TISSUE	PAIRED	cDNA	TRANSCRIPTOMIC	Homo sapiens	ILLUMINA	2019-03-27T00:00:00Z	HL60_HAEMATOPOIETIC_AND_LYMPHOID_TISSUE	cell culture	female	SRP186687	haematopoietic_and_lymphoid_tissue
SRR8616134	61	RNA-Seq	GCA_000001405.13	202	18951467896	NIBRI	PRJNA523380	SAMN10987897	Human	9309635487	HH	BROAD INSTITUTE	public	sra,bam	ncbi,gs,s3	gs.US,s3.us-east-1,ncbi.public	lymphoid_neoplasm (adult_T_cell_lymphoma-leukaemia)	primary	Caucasian	SRX5414916	Illumina HiSeq 2500	cell line	RNASeq-HH_HAEMATOPOIETIC_AND_LYMPHOID_TISSUE	PAIRED	cDNA	TRANSCRIPTOMIC	Homo sapiens	ILLUMINA	2019-03-27T00:00:00Z	HH_HAEMATOPOIETIC_AND_LYMPHOID_TISSUE	cell culture	male	SRP186687	haematopoietic_and_lymphoid_tissue
SRR8616135	69	RNA-Seq	GCA_000001405.13	202	19594688416	HSRRB	PRJNA523380	SAMN10987769	Human	10401219715	HLF	BROAD INSTITUTE	public	sra,bam	s3,gs,ncbi	s3.us-east-1,ncbi.public,gs.US	carcinoma (hepatocellular_carcinoma)	primary	Asian	SRX5414915	Illumina HiSeq 2500	cell line	RNASeq-HLF_LIVER	PAIRED	cDNA	TRANSCRIPTOMIC	Homo sapiens	ILLUMINA	2019-03-27T00:00:00Z	HLF_LIVER	cell culture	male	SRP186687	liver
SRR8616136	54	RNA-Seq	GCA_000001405.13	202	17987144136	GNF	PRJNA523380	SAMN10988274	Human	8870977136	HLF-a	BROAD INSTITUTE	public	bam,sra	s3,ncbi,gs	gs.US,ncbi.public,s3.us-east-1	carcinoma (squamous_cell_carcinoma)	primary	African_american	SRX5414914	Illumina HiSeq 2500	cell line	RNASeq-HLFA_FIBROBLAST	PAIRED	cDNA	TRANSCRIPTOMIC	Homo sapiens	ILLUMINA	2019-03-27T00:00:00Z	HLFA_FIBROBLAST	cell culture	female	SRP186687	lung
SRR8616137	38	RNA-Seq	GCA_000001405.13	202	23386738264	NIBRI	PRJNA523380	SAMN10988163	Human	13099342701	CI-1	BROAD INSTITUTE	public	sra,bam	gs,ncbi,s3	s3.us-east-1,ncbi.public,gs.US	lymphoid_neoplasm (B_cell_lymphoma_unspecified)	metastasis	Caucasian	SRX5414913	Illumina HiSeq 2500	cell line	RNASeq-CI1_HAEMATOPOIETIC_AND_LYMPHOID_TISSUE	PAIRED	cDNA	TRANSCRIPTOMIC	Homo sapiens	ILLUMINA	2019-03-27T00:00:00Z	CI1_HAEMATOPOIETIC_AND_LYMPHOID_TISSUE	cell culture	female	SRP186687	haematopoietic_and_lymphoid_tissue
SRR8616138	NA	RNA-Seq	GCA_000001405.13	202	23831785068	RIKEN:CJM	PRJNA523380	SAMN10987715	Human	13351822663	CJM	BROAD INSTITUTE	public	sra,bam	ncbi,gs,s3	s3.us-east-1,gs.US,ncbi.public	malignant_melanoma	metastasis	Asian	SRX5414912	Illumina HiSeq 2500	cell line	RNASeq-CJM_SKIN	PAIRED	cDNA	TRANSCRIPTOMIC	Homo sapiens	ILLUMINA	2019-03-27T00:00:00Z	CJM_SKIN	cell culture	NA	SRP186687	skin
SRR8616139	NA	RNA-Seq	GCA_000001405.13	202	20455561512	DSMZ:CL-11	PRJNA523380	SAMN10989560	Human	11524753791	CL-11	BROAD INSTITUTE	public	bam,sra	s3,ncbi,gs	s3.us-east-1,gs.US,ncbi.public	carcinoma (adenocarcinoma)	primary	Caucasian	SRX5414911	Illumina HiSeq 2500	cell line	RNASeq-CL11_LARGE_INTESTINE	PAIRED	cDNA	TRANSCRIPTOMIC	Homo sapiens	ILLUMINA	2019-03-27T00:00:00Z	CL11_LARGE_INTESTINE	cell culture	NA	SRP186687	large_intestine
SRR8616140	NA	RNA-Seq	GCA_000001405.13	202	16902309398	DSMZ:CL-14	PRJNA523380	SAMN10988457	Human	9487350789	CL-14	BROAD INSTITUTE	public	bam,sra	ncbi,s3,gs	s3.us-east-1,ncbi.public,gs.US	carcinoma	primary	Caucasian	SRX5414910	Illumina HiSeq 2500	cell line	RNASeq-CL14_LARGE_INTESTINE	PAIRED	cDNA	TRANSCRIPTOMIC	Homo sapiens	ILLUMINA	2019-03-27T00:00:00Z	CL14_LARGE_INTESTINE	cell culture	male	SRP186687	large_intestine
SRR8616141	NA	RNA-Seq	GCA_000001405.13	202	23682036004	DSMZ:CL-34	PRJNA523380	SAMN10989562	Human	13343535648	CL-34	BROAD INSTITUTE	public	sra,bam	s3,ncbi,gs	gs.US,s3.us-east-1,ncbi.public	carcinoma (adenocarcinoma)	primary	Caucasian	SRX5414909	Illumina HiSeq 2500	cell line	RNASeq-CL34_LARGE_INTESTINE	PAIRED	cDNA	TRANSCRIPTOMIC	Homo sapiens	ILLUMINA	2019-03-27T00:00:00Z	CL34_LARGE_INTESTINE	cell culture	female	SRP186687	large_intestine
SRR8616142	NA	RNA-Seq	GCA_000001405.13	202	22796160358	DSMZ:CL-40	PRJNA523380	SAMN10988464	Human	12652257674	CL-40	BROAD INSTITUTE	public	sra,bam	gs,ncbi,s3	s3.us-east-1,gs.US,ncbi.public	carcinoma	primary	Caucasian	SRX5414908	Illumina HiSeq 2500	cell line	RNASeq-CL40_LARGE_INTESTINE	PAIRED	cDNA	TRANSCRIPTOMIC	Homo sapiens	ILLUMINA	2019-03-27T00:00:00Z	CL40_LARGE_INTESTINE	cell culture	female	SRP186687	large_intestine
SRR8616143	0.8333	RNA-Seq	GCA_000001405.13	202	21376276704	DSMZ:CMK	PRJNA523380	SAMN10988101	Human	11957892254	CMK	BROAD INSTITUTE	public	bam,sra	gs,ncbi,s3	ncbi.public,gs.US,s3.us-east-1	haematopoietic_neoplasm (acute_myeloid_leukaemia\, M7)	primary	Asian	SRX5414907	Illumina HiSeq 2500	cell line	RNASeq-CMK_HAEMATOPOIETIC_AND_LYMPHOID_TISSUE	PAIRED	cDNA	TRANSCRIPTOMIC	Homo sapiens	ILLUMINA	2019-03-27T00:00:00Z	CMK_HAEMATOPOIETIC_AND_LYMPHOID_TISSUE	cell culture	male	SRP186687	haematopoietic_and_lymphoid_tissue
SRR8616144	36	RNA-Seq	GCA_000001405.13	202	22275879866	DSMZ:CML-T1	PRJNA523380	SAMN10988485	Human	12430092165	CML-T1	BROAD INSTITUTE	public	bam,sra	ncbi,gs,s3	ncbi.public,gs.US,s3.us-east-1	haematopoietic_neoplasm (blast_phase_chronic_myeloid_leukaemia)	primary	Asian	SRX5414906	Illumina HiSeq 2500	cell line	RNASeq-CMLT1_HAEMATOPOIETIC_AND_LYMPHOID_TISSUE	PAIRED	cDNA	TRANSCRIPTOMIC	Homo sapiens	ILLUMINA	2019-03-27T00:00:00Z	CMLT1_HAEMATOPOIETIC_AND_LYMPHOID_TISSUE	cell culture	female	SRP186687	haematopoietic_and_lymphoid_tissue
SRR8616145	70	RNA-Seq	GCA_000001405.13	202	20745846218	NA	PRJNA523380	SAMN10987883	Human	11663146512	COLO 201	BROAD INSTITUTE	public	sra,bam	ncbi,gs,s3	s3.us-east-1,ncbi.public,gs.US	carcinoma (adenocarcinoma)	metastasis	Caucasian	SRX5414905	Illumina HiSeq 2500	cell line	RNASeq-COLO201_LARGE_INTESTINE	PAIRED	cDNA	TRANSCRIPTOMIC	Homo sapiens	ILLUMINA	2019-03-27T00:00:00Z	COLO201_LARGE_INTESTINE	cell culture	male	SRP186687	large_intestine
SRR8616146	55	RNA-Seq	GCA_000001405.13	202	21242110526	DSMZ:COLO-320	PRJNA523380	SAMN10988542	Human	11971322209	COLO-320	BROAD INSTITUTE	public	bam,sra	ncbi,gs,s3	s3.us-east-1,gs.US,ncbi.public	carcinoma (adenocarcinoma)	primary	Caucasian	SRX5414904	Illumina HiSeq 2500	cell line	RNASeq-COLO320_LARGE_INTESTINE	PAIRED	cDNA	TRANSCRIPTOMIC	Homo sapiens	ILLUMINA	2019-03-27T00:00:00Z	COLO320_LARGE_INTESTINE	cell culture	female	SRP186687	large_intestine
SRR8616147	2	RNA-Seq	GCA_000001405.13	202	20263975622	NIBRI	PRJNA523380	SAMN10988189	Human	10887095663	SK-N-DZ	BROAD INSTITUTE	public	sra,bam	ncbi,s3,gs	s3.us-east-1,ncbi.public,gs.US	neuroblastoma	metastasis	Caucasian	SRX5414903	Illumina HiSeq 2500	cell line	RNASeq-SKNDZ_AUTONOMIC_GANGLIA	PAIRED	cDNA	TRANSCRIPTOMIC	Homo sapiens	ILLUMINA	2019-03-27T00:00:00Z	SKNDZ_AUTONOMIC_GANGLIA	cell culture	female	SRP186687	autonomic_ganglia
SRR8616148	NA	RNA-Seq	GCA_000001405.13	202	20310599040	HSSRB	PRJNA523380	SAMN10987620	Human	10722260034	P31/FUJ	BROAD INSTITUTE	public	sra,bam	s3,gs,ncbi	ncbi.public,gs.US,s3.us-east-1	haematopoietic_neoplasm (acute_myeloid_leukaemia\, M5)	primary	Asian	SRX5414902	Illumina HiSeq 2500	cell line	RNASeq-P31FUJ_HAEMATOPOIETIC_AND_LYMPHOID_TISSUE	PAIRED	cDNA	TRANSCRIPTOMIC	Homo sapiens	ILLUMINA	2019-03-27T00:00:00Z	P31FUJ_HAEMATOPOIETIC_AND_LYMPHOID_TISSUE	cell culture	male	SRP186687	haematopoietic_and_lymphoid_tissue
SRR8616149	7	RNA-Seq	GCA_000001405.13	202	24211638392	DSMZ:P12-ICHIKAWA	PRJNA523380	SAMN10988545	Human	12786879524	P12-ICHIKAWA	BROAD INSTITUTE	public	sra,bam	ncbi,gs,s3	s3.us-east-1,ncbi.public,gs.US	lymphoid_neoplasm (acute_lymphoblastic_T_cell_leukaemia)	primary	Asian	SRX5414901	Illumina HiSeq 2500	cell line	RNASeq-P12ICHIKAWA_HAEMATOPOIETIC_AND_LYMPHOID_TISSUE	PAIRED	cDNA	TRANSCRIPTOMIC	Homo sapiens	ILLUMINA	2019-03-27T00:00:00Z	P12ICHIKAWA_HAEMATOPOIETIC_AND_LYMPHOID_TISSUE	cell culture	male	SRP186687	haematopoietic_and_lymphoid_tissue
SRR8616150	70	RNA-Seq	GCA_000001405.13	202	23656533302	ATCC:Panc 02.03	PRJNA523380	SAMN10987714	Human	12517036171	Panc 02.03	BROAD INSTITUTE	public	sra,bam	ncbi,gs,s3	gs.US,ncbi.public,s3.us-east-1	carcinoma	primary	Caucasian	SRX5414900	Illumina HiSeq 2500	cell line	RNASeq-PANC0203_PANCREAS	PAIRED	cDNA	TRANSCRIPTOMIC	Homo sapiens	ILLUMINA	2019-03-27T00:00:00Z	PANC0203_PANCREAS	cell culture	female	SRP186687	pancreas
SRR8616151	7	RNA-Seq	GCA_000001405.13	202	19917629856	NIBRI	PRJNA523380	SAMN10987599	Human	10502675839	P3HR-1	BROAD INSTITUTE	public	bam,sra	s3,ncbi,gs	s3.us-east-1,gs.US,ncbi.public	lymphoid_neoplasm (Burkitt_lymphoma)	metastasis	African_american	SRX5414899	Illumina HiSeq 2500	cell line	RNASeq-P3HR1_HAEMATOPOIETIC_AND_LYMPHOID_TISSUE	PAIRED	cDNA	TRANSCRIPTOMIC	Homo sapiens	ILLUMINA	2019-03-27T00:00:00Z	P3HR1_HAEMATOPOIETIC_AND_LYMPHOID_TISSUE	cell culture	male	SRP186687	haematopoietic_and_lymphoid_tissue
SRR8616153	33	RNA-Seq	GCA_000001405.13	202	17358247234	NIBRI	PRJNA523380	SAMN10987641	Human	9218661555	NCI-H716	BROAD INSTITUTE	public	sra,bam	s3,gs,ncbi	s3.us-east-1,ncbi.public,gs.US	carcinoma (adenocarcinoma)	metastasis	Caucasian	SRX5414897	Illumina HiSeq 2500	cell line	RNASeq-NCIH716_LARGE_INTESTINE	PAIRED	cDNA	TRANSCRIPTOMIC	Homo sapiens	ILLUMINA	2019-03-27T00:00:00Z	NCIH716_LARGE_INTESTINE	cell culture	male	SRP186687	large_intestine
SRR8616154	78	RNA-Seq	GCA_000001405.13	202	20072994318	HSSRB	PRJNA523380	SAMN10987767	Human	10571891467	OVTOKO	BROAD INSTITUTE	public	sra,bam	s3,ncbi,gs	ncbi.public,s3.us-east-1,gs.US	carcinoma (clear_cell_carcinoma)	metastasis	Asian	SRX5414896	Illumina HiSeq 2500	cell line	RNASeq-OVTOKO_OVARY	PAIRED	cDNA	TRANSCRIPTOMIC	Homo sapiens	ILLUMINA	2019-03-27T00:00:00Z	OVTOKO_OVARY	cell culture	female	SRP186687	ovary
SRR8616155	56	RNA-Seq	GCA_000001405.13	202	16645022604	HSSRB	PRJNA523380	SAMN10988236	Human	8374254276	OVSAHO	BROAD INSTITUTE	public	sra,bam	gs,ncbi,s3	ncbi.public,gs.US,s3.us-east-1	carcinoma (adenocarcinoma)	metastasis	Asian	SRX5414895	Illumina HiSeq 2500	cell line	RNASeq-OVSAHO_OVARY	PAIRED	cDNA	TRANSCRIPTOMIC	Homo sapiens	ILLUMINA	2019-03-27T00:00:00Z	OVSAHO_OVARY	cell culture	female	SRP186687	ovary
SRR8616156	NA	RNA-Seq	GCA_000001405.13	202	15808894104	ATCC:NCI-H650	PRJNA523380	SAMN10988027	Human	7834517589	NCI-H650	BROAD INSTITUTE	public	sra,bam	gs,s3,ncbi	gs.US,ncbi.public,s3.us-east-1	carcinoma (bronchioloalveolar_adenocarcinoma)	metastasis	Caucasian	SRX5414894	Illumina HiSeq 2500	cell line	RNASeq-NCIH650_LUNG	PAIRED	cDNA	TRANSCRIPTOMIC	Homo sapiens	ILLUMINA	2019-03-27T00:00:00Z	NCIH650_LUNG	cell culture	male	SRP186687	lung
SRR8616157	63	RNA-Seq	GCA_000001405.13	202	18296828922	GNF	PRJNA523380	SAMN10988121	Human	9786920494	NCI-H660	BROAD INSTITUTE	public	sra,bam	s3,ncbi,gs	ncbi.public,s3.us-east-1,gs.US	carcinoma (small_cell_carcinoma)	metastasis	Caucasian	SRX5414893	Illumina HiSeq 2500	cell line	RNASeq-NCIH660_PROSTATE	PAIRED	cDNA	TRANSCRIPTOMIC	Homo sapiens	ILLUMINA	2019-03-27T00:00:00Z	NCIH660_PROSTATE	cell culture	male	SRP186687	prostate
SRR8616158	43	RNA-Seq	GCA_000001405.13	202	14817496890	ATCC:NCI-H661	PRJNA523380	SAMN10988284	Human	7244801460	NCI-H661	BROAD INSTITUTE	public	sra,bam	ncbi,gs,s3	gs.US,s3.us-east-1,ncbi.public	carcinoma (large_cell_carcinoma)	metastasis	Caucasian	SRX5414892	Illumina HiSeq 2500	cell line	RNASeq-NCIH661_LUNG	PAIRED	cDNA	TRANSCRIPTOMIC	Homo sapiens	ILLUMINA	2019-03-27T00:00:00Z	NCIH661_LUNG	cell culture	male	SRP186687	lung
SRR8616159	55	RNA-Seq	GCA_000001405.13	202	25698919144	KCLB:NCI-H684	PRJNA523380	SAMN10988095	Human	13572563443	NCI-H684	BROAD INSTITUTE	public	sra,bam	ncbi,gs,s3	s3.us-east-1,gs.US,ncbi.public	other (hepatoblastoma)	primary	Caucasian	SRX5414891	Illumina HiSeq 2500	cell line	RNASeq-NCIH684_LIVER	PAIRED	cDNA	TRANSCRIPTOMIC	Homo sapiens	ILLUMINA	2019-03-27T00:00:00Z	NCIH684_LIVER	cell culture	NA	SRP186687	liver
SRR8616160	63	RNA-Seq	GCA_000001405.13	202	15369392806	ATCC:NCI-H524	PRJNA523380	SAMN10988203	Human	7605787616	NCI-H524	BROAD INSTITUTE	public	sra,bam	s3,gs,ncbi	gs.US,s3.us-east-1,ncbi.public	carcinoma (small_cell_carcinoma)	metastasis	Caucasian	SRX5414890	Illumina HiSeq 2500	cell line	RNASeq-NCIH524_LUNG	PAIRED	cDNA	TRANSCRIPTOMIC	Homo sapiens	ILLUMINA	2019-03-27T00:00:00Z	NCIH524_LUNG	cell culture	male	SRP186687	lung
SRR8616161	55	RNA-Seq	GCA_000001405.13	202	16502864296	ATCC:NCI-H526	PRJNA523380	SAMN10988341	Human	8146833275	NCI-H526	BROAD INSTITUTE	public	bam,sra	gs,ncbi,s3	s3.us-east-1,gs.US,ncbi.public	carcinoma (small_cell_carcinoma)	metastasis	Caucasian	SRX5414889	Illumina HiSeq 2500	cell line	RNASeq-NCIH526_LUNG	PAIRED	cDNA	TRANSCRIPTOMIC	Homo sapiens	ILLUMINA	2019-03-27T00:00:00Z	NCIH526_LUNG	cell culture	male	SRP186687	lung
SRR8616162	73	RNA-Seq	GCA_000001405.13	202	21515164228	ATCC:NCI-H596	PRJNA523380	SAMN10988026	Human	11336357078	NCI-H596	BROAD INSTITUTE	public	bam,sra	ncbi,gs,s3	ncbi.public,gs.US,s3.us-east-1	carcinoma (mixed_adenosquamous_carcinoma)	primary	Caucasian	SRX5414888	Illumina HiSeq 2500	cell line	RNASeq-NCIH596_LUNG	PAIRED	cDNA	TRANSCRIPTOMIC	Homo sapiens	ILLUMINA	2019-03-27T00:00:00Z	NCIH596_LUNG	cell culture	male	SRP186687	lung
SRR8616163	56	RNA-Seq	GCA_000001405.13	202	22916270164	ATCC:NCI-H647	PRJNA523380	SAMN10988271	Human	12071566675	NCI-H647	BROAD INSTITUTE	public	bam,sra	gs,s3,ncbi	ncbi.public,gs.US,s3.us-east-1	carcinoma (mixed_adenosquamous_carcinoma)	metastasis	Caucasian	SRX5414887	Illumina HiSeq 2500	cell line	RNASeq-NCIH647_LUNG	PAIRED	cDNA	TRANSCRIPTOMIC	Homo sapiens	ILLUMINA	2019-03-27T00:00:00Z	NCIH647_LUNG	cell culture	male	SRP186687	lung
SRR8616164	12	RNA-Seq	GCA_000001405.13	202	19969699396	DSMZ:697	PRJNA523380	SAMN10988566	Human	10645845009	697	BROAD INSTITUTE	public	bam,sra	ncbi,gs,s3	gs.US,ncbi.public,s3.us-east-1	lymphoid_neoplasm (acute_lymphoblastic_B_cell_leukaemia)	primary	Caucasian	SRX5414886	Illumina HiSeq 2500	cell line	RNASeq-697_HAEMATOPOIETIC_AND_LYMPHOID_TISSUE	PAIRED	cDNA	TRANSCRIPTOMIC	Homo sapiens	ILLUMINA	2019-03-27T00:00:00Z	697_HAEMATOPOIETIC_AND_LYMPHOID_TISSUE	cell culture	male	SRP186687	haematopoietic_and_lymphoid_tissue
SRR8616165	NA	RNA-Seq	GCA_000001405.13	202	16371797808	DSMZ:647-V	PRJNA523380	SAMN10989565	Human	8197275261	647-V	BROAD INSTITUTE	public	bam,sra	ncbi,gs,s3	ncbi.public,s3.us-east-1,gs.US	carcinoma (transitional_cell_carcinoma)	primary	Caucasian	SRX5414885	Illumina HiSeq 2500	cell line	RNASeq-647V_URINARY_TRACT	PAIRED	cDNA	TRANSCRIPTOMIC	Homo sapiens	ILLUMINA	2019-03-27T00:00:00Z	647V_URINARY_TRACT	cell culture	male	SRP186687	urinary_tract
SRR8616166	NA	RNA-Seq	GCA_000001405.13	202	16802986806	KCLB:253J	PRJNA523380	SAMN10987961	Human	8386351827	253J	BROAD INSTITUTE	public	sra,bam	s3,gs,ncbi	ncbi.public,s3.us-east-1,gs.US	carcinoma (transitional_cell_carcinoma)	primary	Caucasian	SRX5414884	Illumina HiSeq 2500	cell line	RNASeq-253J_URINARY_TRACT	PAIRED	cDNA	TRANSCRIPTOMIC	Homo sapiens	ILLUMINA	2019-03-27T00:00:00Z	253J_URINARY_TRACT	cell culture	NA	SRP186687	urinary_tract
SRR8616167	NA	RNA-Seq	GCA_000001405.13	202	16948436906	NA	PRJNA523380	SAMN10987963	Human	8486744035	253J-BV	BROAD INSTITUTE	public	sra,bam	ncbi,gs,s3	gs.US,s3.us-east-1,ncbi.public	carcinoma (transitional_cell_carcinoma)	primary	Caucasian	SRX5414883	Illumina HiSeq 2500	cell line	RNASeq-253JBV_URINARY_TRACT	PAIRED	cDNA	TRANSCRIPTOMIC	Homo sapiens	ILLUMINA	2019-03-27T00:00:00Z	253JBV_URINARY_TRACT	cell culture	NA	SRP186687	urinary_tract
SRR8616168	72	RNA-Seq	GCA_000001405.13	202	14902653222	DSMZ:23132/87	PRJNA523380	SAMN10988573	Human	7437990317	23132/87	BROAD INSTITUTE	public	sra,bam	ncbi,s3,gs	ncbi.public,gs.US,s3.us-east-1	carcinoma (adenocarcinoma)	primary	Caucasian	SRX5414882	Illumina HiSeq 2500	cell line	RNASeq-2313287_STOMACH	PAIRED	cDNA	TRANSCRIPTOMIC	Homo sapiens	ILLUMINA	2019-03-27T00:00:00Z	2313287_STOMACH	cell culture	male	SRP186687	stomach
SRR8616169	NA	RNA-Seq	GCA_000001405.13	202	19562008250	ATCC:22Rv1	PRJNA523380	SAMN10988315	Human	9998459406	22Rv1	BROAD INSTITUTE	public	sra,bam	gs,s3,ncbi	s3.us-east-1,ncbi.public,gs.US	carcinoma	primary	Caucasian	SRX5414881	Illumina HiSeq 2500	cell line	RNASeq-22RV1_PROSTATE	PAIRED	cDNA	TRANSCRIPTOMIC	Homo sapiens	ILLUMINA	2019-03-27T00:00:00Z	22RV1_PROSTATE	cell culture	male	SRP186687	prostate
SRR8616170	69	RNA-Seq	GCA_000001405.13	202	17446554362	ATCC:639-V	PRJNA523380	SAMN10989559	Human	8728693769	639-V	BROAD INSTITUTE	public	bam,sra	ncbi,s3,gs	gs.US,s3.us-east-1,ncbi.public	carcinoma (transitional_cell_carcinoma)	primary	Caucasian	SRX5414880	Illumina HiSeq 2500	cell line	RNASeq-639V_URINARY_TRACT	PAIRED	cDNA	TRANSCRIPTOMIC	Homo sapiens	ILLUMINA	2019-03-27T00:00:00Z	639V_URINARY_TRACT	cell culture	male	SRP186687	urinary_tract
SRR8616171	NA	RNA-Seq	GCA_000001405.13	202	17586143634	ECACC:59M	PRJNA523380	SAMN10988041	Human	8805376174	59M	BROAD INSTITUTE	public	sra,bam	s3,ncbi,gs	ncbi.public,s3.us-east-1,gs.US	carcinoma	metastasis	Caucasian	SRX5414879	Illumina HiSeq 2500	cell line	RNASeq-59M_OVARY	PAIRED	cDNA	TRANSCRIPTOMIC	Homo sapiens	ILLUMINA	2019-03-27T00:00:00Z	59M_OVARY	cell culture	female	SRP186687	ovary
SRR8616172	68	RNA-Seq	GCA_000001405.13	202	18238856538	NA	PRJNA523380	SAMN10987658	Human	9033961984	5637	BROAD INSTITUTE	public	sra,bam	ncbi,s3,gs	s3.us-east-1,gs.US,ncbi.public	carcinoma	primary	Asian	SRX5414878	Illumina HiSeq 2500	cell line	RNASeq-5637_URINARY_TRACT	PAIRED	cDNA	TRANSCRIPTOMIC	Homo sapiens	ILLUMINA	2019-03-27T00:00:00Z	5637_URINARY_TRACT	cell culture	male	SRP186687	urinary_tract
SRR8616173	63	RNA-Seq	GCA_000001405.13	202	16354024232	DSMZ:42-MG-BA	PRJNA523380	SAMN10988275	Human	8212336296	42-MG-BA	BROAD INSTITUTE	public	bam,sra	ncbi,gs,s3	s3.us-east-1,ncbi.public,gs.US	glioma (astrocytoma_Grade_IV\, glioblastoma_multiforme)	primary	Caucasian	SRX5414877	Illumina HiSeq 2500	cell line	RNASeq-42MGBA_CENTRAL_NERVOUS_SYSTEM	PAIRED	cDNA	TRANSCRIPTOMIC	Homo sapiens	ILLUMINA	2019-03-27T00:00:00Z	42MGBA_CENTRAL_NERVOUS_SYSTEM	cell culture	male	SRP186687	central_nervous_system
SRR8616174	61	RNA-Seq	GCA_000001405.13	202	15979545118	NA	PRJNA523380	SAMN10987850	Human	8047160264	HCC1954	BROAD INSTITUTE	public	sra,bam	gs,s3,ncbi	s3.us-east-1,gs.US,ncbi.public	carcinoma (ductal_carcinoma)	primary	Caucasian	SRX5414876	Illumina HiSeq 2500	cell line	RNASeq-HCC1954_BREAST	PAIRED	cDNA	TRANSCRIPTOMIC	Homo sapiens	ILLUMINA	2019-03-27T00:00:00Z	HCC1954_BREAST	cell culture	female	SRP186687	breast
SRR8616175	82	RNA-Seq	GCA_000001405.13	202	16305331728	ATCC:HCC202	PRJNA523380	SAMN10988183	Human	8048711022	HCC202	BROAD INSTITUTE	public	bam,sra	gs,ncbi,s3	gs.US,s3.us-east-1,ncbi.public	carcinoma (ductal_carcinoma)	primary	Caucasian	SRX5414875	Illumina HiSeq 2500	cell line	RNASeq-HCC202_BREAST	PAIRED	cDNA	TRANSCRIPTOMIC	Homo sapiens	ILLUMINA	2019-03-27T00:00:00Z	HCC202_BREAST	cell culture	female	SRP186687	breast
SRR8616176	47	RNA-Seq	GCA_000001405.13	202	18549767666	DSMZ:HCC-15	PRJNA523380	SAMN10987789	Human	9207212808	HCC-15	BROAD INSTITUTE	public	sra,bam	ncbi,s3,gs	gs.US,ncbi.public,s3.us-east-1	carcinoma (squamous_cell_carcinoma)	primary	African_american	SRX5414874	Illumina HiSeq 2500	cell line	RNASeq-HCC15_LUNG	PAIRED	cDNA	TRANSCRIPTOMIC	Homo sapiens	ILLUMINA	2019-03-27T00:00:00Z	HCC15_LUNG	cell culture	male	SRP186687	lung
SRR8616177	60	RNA-Seq	GCA_000001405.13	202	26808904498	NIBRI	PRJNA523380	SAMN10988428	Human	14925066347	HCC1806	BROAD INSTITUTE	public	sra,bam	s3,gs,ncbi	ncbi.public,gs.US,s3.us-east-1	carcinoma (ductal_carcinoma\, squamous_cell_carcinoma)	primary	African_american	SRX5414873	Illumina HiSeq 2500	cell line	RNASeq-HCC1806_BREAST	PAIRED	cDNA	TRANSCRIPTOMIC	Homo sapiens	ILLUMINA	2019-03-27T00:00:00Z	HCC1806_BREAST	cell culture	female	SRP186687	breast
SRR8616178	69	RNA-Seq	GCA_000001405.13	202	17618862382	KCLB:HCC-1833	PRJNA523380	SAMN10988044	Human	9873110551	HCC-1833	BROAD INSTITUTE	public	bam,sra	s3,ncbi,gs	gs.US,ncbi.public,s3.us-east-1	carcinoma (adenocarcinoma)	primary	African_american	SRX5414872	Illumina HiSeq 2500	cell line	RNASeq-HCC1833_LUNG	PAIRED	cDNA	TRANSCRIPTOMIC	Homo sapiens	ILLUMINA	2019-03-27T00:00:00Z	HCC1833_LUNG	cell culture	female	SRP186687	lung
SRR8616179	24	RNA-Seq	GCA_000001405.13	202	18651137528	ATCC:HCC1937	PRJNA523380	SAMN10987920	Human	9194471664	HCC1937	BROAD INSTITUTE	public	sra,bam	ncbi,s3,gs	gs.US,s3.us-east-1,ncbi.public	carcinoma (ductal_carcinoma)	primary	Caucasian	SRX5414871	Illumina HiSeq 2500	cell line	RNASeq-HCC1937_BREAST	PAIRED	cDNA	TRANSCRIPTOMIC	Homo sapiens	ILLUMINA	2019-03-27T00:00:00Z	HCC1937_BREAST	cell culture	female	SRP186687	breast
SRR8616180	32	RNA-Seq	GCA_000001405.13	202	25516582632	ATCC:HCC1500	PRJNA523380	SAMN10988466	Human	14371130828	HCC1500	BROAD INSTITUTE	public	bam,sra	gs,ncbi,s3	gs.US,ncbi.public,s3.us-east-1	carcinoma (ductal_carcinoma)	primary	African_american	SRX5414870	Illumina HiSeq 2500	cell line	RNASeq-HCC1500_BREAST	PAIRED	cDNA	TRANSCRIPTOMIC	Homo sapiens	ILLUMINA	2019-03-27T00:00:00Z	HCC1500_BREAST	cell culture	female	SRP186687	breast
SRR8616181	70	RNA-Seq	GCA_000001405.13	202	19024780160	NA	PRJNA523380	SAMN10987921	Human	10633606586	HCC1569	BROAD INSTITUTE	public	sra,bam	s3,gs,ncbi	ncbi.public,s3.us-east-1,gs.US	carcinoma (metaplastic_carcinoma)	primary	African_american	SRX5414869	Illumina HiSeq 2500	cell line	RNASeq-HCC1569_BREAST	PAIRED	cDNA	TRANSCRIPTOMIC	Homo sapiens	ILLUMINA	2019-03-27T00:00:00Z	HCC1569_BREAST	cell culture	female	SRP186687	breast
SRR8616182	63	RNA-Seq	GCA_000001405.13	202	20472993304	KCLB:HCC-1588	PRJNA523380	SAMN10987742	Human	11502719881	HCC-1588	BROAD INSTITUTE	public	bam,sra	ncbi,gs,s3	s3.us-east-1,gs.US,ncbi.public	carcinoma (squamous_cell_carcinoma)	primary	Caucasian	SRX5414868	Illumina HiSeq 2500	cell line	RNASeq-HCC1588_LUNG	PAIRED	cDNA	TRANSCRIPTOMIC	Homo sapiens	ILLUMINA	2019-03-27T00:00:00Z	HCC1588_LUNG	cell culture	female	SRP186687	lung
SRR8616183	44	RNA-Seq	GCA_000001405.13	202	20437398682	ATCC:HCC1599	PRJNA523380	SAMN10988467	Human	11519423301	HCC1599	BROAD INSTITUTE	public	sra,bam	ncbi,s3,gs	ncbi.public,gs.US,s3.us-east-1	carcinoma (ductal_carcinoma)	primary	Caucasian	SRX5414867	Illumina HiSeq 2500	cell line	RNASeq-HCC1599_BREAST	PAIRED	cDNA	TRANSCRIPTOMIC	Homo sapiens	ILLUMINA	2019-03-27T00:00:00Z	HCC1599_BREAST	cell culture	female	SRP186687	breast
SRR8616184	NA	RNA-Seq	GCA_000001405.13	202	29142503438	RIKEN:Sq-1	PRJNA523380	SAMN10988374	Human	14454382887	Sq-1	BROAD INSTITUTE	public	sra,bam	gs,ncbi,s3	gs.US,ncbi.public,s3.us-east-1	carcinoma (squamous_cell_carcinoma)	primary	Asian	SRX5414866	Illumina HiSeq 2500	cell line	RNASeq-SQ1_LUNG	PAIRED	cDNA	TRANSCRIPTOMIC	Homo sapiens	ILLUMINA	2019-03-27T00:00:00Z	SQ1_LUNG	cell culture	NA	SRP186687	lung
SRR8616185	56	RNA-Seq	GCA_000001405.13	202	21314065956	NIBRI	PRJNA523380	SAMN10988310	Human	11391132353	LoVo	BROAD INSTITUTE	public	bam,sra	gs,ncbi,s3	ncbi.public,s3.us-east-1,gs.US	carcinoma (adenocarcinoma)	metastasis	Caucasian	SRX5414865	Illumina HiSeq 2500	cell line	RNASeq-LOVO_LARGE_INTESTINE	PAIRED	cDNA	TRANSCRIPTOMIC	Homo sapiens	ILLUMINA	2019-03-27T00:00:00Z	LOVO_LARGE_INTESTINE	cell culture	male	SRP186687	large_intestine
SRR8616186	58	RNA-Seq	GCA_000001405.13	202	17513951258	NCI/DCTD	PRJNA523380	SAMN10988372	Human	8700760847	LOX IMVI	BROAD INSTITUTE	public	bam,sra	gs,s3,ncbi	s3.us-east-1,ncbi.public,gs.US	malignant_melanoma	primary	Caucasian	SRX5414864	Illumina HiSeq 2500	cell line	RNASeq-LOXIMVI_SKIN	PAIRED	cDNA	TRANSCRIPTOMIC	Homo sapiens	ILLUMINA	2019-03-27T00:00:00Z	LOXIMVI_SKIN	cell culture	male	SRP186687	skin
SRR8616187	NA	RNA-Seq	GCA_000001405.13	202	24070128302	ATCC:NCI-H1563	PRJNA523380	SAMN10987885	Human	12668375728	NCI-H1563	BROAD INSTITUTE	public	sra,bam	gs,ncbi,s3	s3.us-east-1,gs.US,ncbi.public	carcinoma (adenocarcinoma)	primary	Caucasian	SRX5414863	Illumina HiSeq 2500	cell line	RNASeq-NCIH1563_LUNG	PAIRED	cDNA	TRANSCRIPTOMIC	Homo sapiens	ILLUMINA	2019-03-27T00:00:00Z	NCIH1563_LUNG	cell culture	male	SRP186687	lung
SRR8616188	59	RNA-Seq	GCA_000001405.13	202	16387165362	ATCC:NCI-H146	PRJNA523380	SAMN10988324	Human	8093112266	NCI-H146	BROAD INSTITUTE	public	sra,bam	s3,gs,ncbi	gs.US,s3.us-east-1,ncbi.public	carcinoma (small_cell_carcinoma)	metastasis	Caucasian	SRX5414862	Illumina HiSeq 2500	cell line	RNASeq-NCIH146_LUNG	PAIRED	cDNA	TRANSCRIPTOMIC	Homo sapiens	ILLUMINA	2019-03-27T00:00:00Z	NCIH146_LUNG	cell culture	male	SRP186687	lung
SRR8616189	35	RNA-Seq	GCA_000001405.13	202	19163373168	ATCC:NCI-H1573	PRJNA523380	SAMN10987661	Human	10132171063	NCI-H1573	BROAD INSTITUTE	public	bam,sra	ncbi,s3,gs	ncbi.public,s3.us-east-1,gs.US	carcinoma (adenocarcinoma)	metastasis	Caucasian	SRX5414861	Illumina HiSeq 2500	cell line	RNASeq-NCIH1573_LUNG	PAIRED	cDNA	TRANSCRIPTOMIC	Homo sapiens	ILLUMINA	2019-03-27T00:00:00Z	NCIH1573_LUNG	cell culture	female	SRP186687	lung
SRR8616190	48	RNA-Seq	GCA_000001405.13	202	17252355198	ATCC:NCI-H1568	PRJNA523380	SAMN10987877	Human	8609418789	NCI-H1568	BROAD INSTITUTE	public	bam,sra	gs,ncbi,s3	s3.us-east-1,gs.US,ncbi.public	carcinoma (non_small_cell_carcinoma)	metastasis	Caucasian	SRX5414860	Illumina HiSeq 2500	cell line	RNASeq-NCIH1568_LUNG	PAIRED	cDNA	TRANSCRIPTOMIC	Homo sapiens	ILLUMINA	2019-03-27T00:00:00Z	NCIH1568_LUNG	cell culture	female	SRP186687	lung
SRR8616191	55	RNA-Seq	GCA_000001405.13	202	14925497402	ATCC:NCI-H1618	PRJNA523380	SAMN10988122	Human	7442312508	NCI-H1618	BROAD INSTITUTE	public	sra,bam	s3,gs,ncbi	s3.us-east-1,gs.US,ncbi.public	carcinoma (small_cell_carcinoma)	metastasis	Caucasian	SRX5414859	Illumina HiSeq 2500	cell line	RNASeq-NCIH1618_LUNG	PAIRED	cDNA	TRANSCRIPTOMIC	Homo sapiens	ILLUMINA	2019-03-27T00:00:00Z	NCIH1618_LUNG	cell culture	female	SRP186687	lung
SRR8616192	44	RNA-Seq	GCA_000001405.13	202	16102499488	ATCC:NCI-H1581	PRJNA523380	SAMN10988311	Human	8076800382	NCI-H1581	BROAD INSTITUTE	public	sra,bam	s3,gs,ncbi	ncbi.public,s3.us-east-1,gs.US	carcinoma (large_cell_carcinoma)	primary	Caucasian	SRX5414858	Illumina HiSeq 2500	cell line	RNASeq-NCIH1581_LUNG	PAIRED	cDNA	TRANSCRIPTOMIC	Homo sapiens	ILLUMINA	2019-03-27T00:00:00Z	NCIH1581_LUNG	cell culture	male	SRP186687	lung
SRR8616193	NA	RNA-Seq	GCA_000001405.13	202	21719583986	ATCC:CA46	PRJNA523380	SAMN10987878	Human	12130841516	CA46	BROAD INSTITUTE	public	sra,bam	s3,ncbi,gs	ncbi.public,gs.US,s3.us-east-1	lymphoid_neoplasm (Burkitt_lymphoma)	metastasis	Asian	SRX5415209	Illumina HiSeq 2500	cell line	RNASeq-CA46_HAEMATOPOIETIC_AND_LYMPHOID_TISSUE	PAIRED	cDNA	TRANSCRIPTOMIC	Homo sapiens	ILLUMINA	2019-03-27T00:00:00Z	CA46_HAEMATOPOIETIC_AND_LYMPHOID_TISSUE	cell culture	male	SRP186687	haematopoietic_and_lymphoid_tissue
SRR8616194	NA	RNA-Seq	GCA_000001405.13	202	16727160450	NA	PRJNA523380	SAMN10989600	Human	8923019492	CACO2;CACO2;CaCo-2	BROAD INSTITUTE	public	bam,sra	ncbi,gs,s3	gs.US,ncbi.public,s3.us-east-1	NA	NA	NA	SRX5415208	Illumina HiSeq 2500	cell line	RNASeq-CACO2_LARGE_INTESTINE	PAIRED	cDNA	TRANSCRIPTOMIC	Homo sapiens	ILLUMINA	2019-03-27T00:00:00Z	CACO2_LARGE_INTESTINE	cell culture	NA	SRP186687	large_intestine
SRR8616195	60	RNA-Seq	GCA_000001405.13	202	16170449460	NIBRI	PRJNA523380	SAMN10988308	Human	8663310938	BT-474	BROAD INSTITUTE	public	sra,bam	gs,ncbi,s3	ncbi.public,gs.US,s3.us-east-1	carcinoma (ductal_carcinoma)	primary	Caucasian	SRX5415207	Illumina HiSeq 2500	cell line	RNASeq-BT474_BREAST	PAIRED	cDNA	TRANSCRIPTOMIC	Homo sapiens	ILLUMINA	2019-03-27T00:00:00Z	BT474_BREAST	cell culture	female	SRP186687	breast
SRR8616196	23	RNA-Seq	GCA_000001405.13	202	20052414356	ATCC:BT-483	PRJNA523380	SAMN10988523	Human	11311525131	BT-483	BROAD INSTITUTE	public	bam,sra	s3,gs,ncbi	ncbi.public,gs.US,s3.us-east-1	carcinoma (ductal_carcinoma\, medullary)	primary	Caucasian	SRX5415206	Illumina HiSeq 2500	cell line	RNASeq-BT483_BREAST	PAIRED	cDNA	TRANSCRIPTOMIC	Homo sapiens	ILLUMINA	2019-03-27T00:00:00Z	BT483_BREAST	cell culture	female	SRP186687	breast
SRR8616197	72	RNA-Seq	GCA_000001405.13	202	23540323308	ATCC:BT-549	PRJNA523380	SAMN10988343	Human	11549532475	BT-549	BROAD INSTITUTE	public	bam,sra	ncbi,gs,s3	ncbi.public,s3.us-east-1,gs.US	carcinoma (ductal_carcinoma\, papillary)	primary	Caucasian	SRX5415205	Illumina HiSeq 2500	cell line	RNASeq-BT549_BREAST	PAIRED	cDNA	TRANSCRIPTOMIC	Homo sapiens	ILLUMINA	2019-03-27T00:00:00Z	BT549_BREAST	cell culture	female	SRP186687	breast
SRR8616198	45	RNA-Seq	GCA_000001405.13	202	19812735296	DSMZ:BV-173	PRJNA523380	SAMN10988488	Human	11211731888	BV-173	BROAD INSTITUTE	public	sra,bam	s3,gs,ncbi	s3.us-east-1,gs.US,ncbi.public	haematopoietic_neoplasm (blast_phase_chronic_myeloid_leukaemia)	primary	Caucasian	SRX5415204	Illumina HiSeq 2500	cell line	RNASeq-BV173_HAEMATOPOIETIC_AND_LYMPHOID_TISSUE	PAIRED	cDNA	TRANSCRIPTOMIC	Homo sapiens	ILLUMINA	2019-03-27T00:00:00Z	BV173_HAEMATOPOIETIC_AND_LYMPHOID_TISSUE	cell culture	male	SRP186687	haematopoietic_and_lymphoid_tissue
SRR8616199	61	RNA-Seq	GCA_000001405.13	202	19174587198	NIBRI	PRJNA523380	SAMN10987955	Human	10316726420	BxPC-3	BROAD INSTITUTE	public	bam,sra	ncbi,gs,s3	s3.us-east-1,ncbi.public,gs.US	carcinoma (ductal_carcinoma)	primary	Caucasian	SRX5415203	Illumina HiSeq 2500	cell line	RNASeq-BXPC3_PANCREAS	PAIRED	cDNA	TRANSCRIPTOMIC	Homo sapiens	ILLUMINA	2019-03-27T00:00:00Z	BXPC3_PANCREAS	cell culture	female	SRP186687	pancreas
SRR8616200	72	RNA-Seq	GCA_000001405.13	202	17692319076	ATCC:C2BBe1	PRJNA523380	SAMN10987952	Human	8778965510	C2BBe1	BROAD INSTITUTE	public	bam,sra	ncbi,gs,s3	gs.US,ncbi.public,s3.us-east-1	carcinoma (adenocarcinoma)	primary	Caucasian	SRX5415202	Illumina HiSeq 2500	cell line	RNASeq-C2BBE1_LARGE_INTESTINE	PAIRED	cDNA	TRANSCRIPTOMIC	Homo sapiens	ILLUMINA	2019-03-27T00:00:00Z	C2BBE1_LARGE_INTESTINE	cell culture	male	SRP186687	large_intestine
SRR8616201	53	RNA-Seq	GCA_000001405.13	202	17253365198	ATCC:C32	PRJNA523380	SAMN10988316	Human	9157396706	C32	BROAD INSTITUTE	public	bam,sra	gs,ncbi,s3	s3.us-east-1,ncbi.public,gs.US	malignant_melanoma	primary	Caucasian	SRX5415201	Illumina HiSeq 2500	cell line	RNASeq-C32_SKIN	PAIRED	cDNA	TRANSCRIPTOMIC	Homo sapiens	ILLUMINA	2019-03-27T00:00:00Z	C32_SKIN	cell culture	male	SRP186687	skin
SRR8616202	NA	RNA-Seq	GCA_000001405.13	202	10470607986	NA	PRJNA523380	SAMN10989599	Human	4849371632	C8166	BROAD INSTITUTE	public	sra,bam	s3,ncbi,gs	ncbi.public,s3.us-east-1,gs.US	NA	NA	NA	SRX5415200	Illumina HiSeq 2500	cell line	RNASeq-C8166_HAEMATOPOIETIC_AND_LYMPHOID_TISSUE	PAIRED	cDNA	TRANSCRIPTOMIC	Homo sapiens	ILLUMINA	2019-03-27T00:00:00Z	C8166_HAEMATOPOIETIC_AND_LYMPHOID_TISSUE	cell culture	NA	SRP186687	haematopoietic_and_lymphoid_tissue
SRR8616203	50	RNA-Seq	GCA_000001405.13	202	12225966978	ATCC:Hs 172.T	PRJNA523380	SAMN10988444	Human	5921791487	Hs 172.T	BROAD INSTITUTE	public	bam,sra	ncbi,gs,s3	s3.us-east-1,ncbi.public,gs.US	carcinoma	primary	Caucasian	SRX5415199	Illumina HiSeq 2500	cell line	RNASeq-HS172T_FIBROBLAST	PAIRED	cDNA	TRANSCRIPTOMIC	Homo sapiens	ILLUMINA	2019-03-27T00:00:00Z	HS172T_FIBROBLAST	cell culture	male	SRP186687	urinary_tract
SRR8616204	65	RNA-Seq	GCA_000001405.13	202	20310402494	ATCC:Hs 229.T	PRJNA523380	SAMN10988156	Human	9965364802	Hs 229.T	BROAD INSTITUTE	public	sra,bam	ncbi,s3,gs	ncbi.public,gs.US,s3.us-east-1	carcinoma (adenocarcinoma)	primary	Caucasian	SRX5415198	Illumina HiSeq 2500	cell line	RNASeq-HS229T_FIBROBLAST	PAIRED	cDNA	TRANSCRIPTOMIC	Homo sapiens	ILLUMINA	2019-03-27T00:00:00Z	HS229T_FIBROBLAST	cell culture	male	SRP186687	lung
SRR8616205	NA	RNA-Seq	GCA_000001405.13	202	17240763630	Garraway Lab	PRJNA523380	SAMN10989587	Human	9157032297	HOP-62	BROAD INSTITUTE	public	bam,sra	gs,ncbi,s3	ncbi.public,gs.US,s3.us-east-1	carcinoma (adenocarcinoma)	primary	Caucasian	SRX5415197	Illumina HiSeq 2500	cell line	RNASeq-HOP62_LUNG	PAIRED	cDNA	TRANSCRIPTOMIC	Homo sapiens	ILLUMINA	2019-03-27T00:00:00Z	HOP62_LUNG	cell culture	NA	SRP186687	lung
SRR8616206	NA	RNA-Seq	GCA_000001405.13	202	17165291986	Garraway Lab	PRJNA523380	SAMN10989594	Human	8428513779	HOP-92	BROAD INSTITUTE	public	sra,bam	ncbi,s3,gs	ncbi.public,s3.us-east-1,gs.US	carcinoma (large_cell_carcinoma)	primary	Caucasian	SRX5415196	Illumina HiSeq 2500	cell line	RNASeq-HOP92_LUNG	PAIRED	cDNA	TRANSCRIPTOMIC	Homo sapiens	ILLUMINA	2019-03-27T00:00:00Z	HOP92_LUNG	cell culture	NA	SRP186687	lung
SRR8616207	NA	RNA-Seq	GCA_000001405.13	202	16796953672	NA	PRJNA523380	SAMN10988390	Human	9009731017	HMEL	BROAD INSTITUTE	public	bam,sra	s3,ncbi,gs	gs.US,ncbi.public,s3.us-east-1	other (immortalized_epithelial)	NA	African_american	SRX5415195	Illumina HiSeq 2500	cell line	RNASeq-HMEL_BREAST	PAIRED	cDNA	TRANSCRIPTOMIC	Homo sapiens	ILLUMINA	2019-03-27T00:00:00Z	HMEL_BREAST	cell culture	NA	SRP186687	breast
SRR8616208	NA	RNA-Seq	GCA_000001405.13	202	19329652700	NA	PRJNA523380	SAMN10989583	Human	10312809368	HNT-34	BROAD INSTITUTE	public	bam,sra	ncbi,s3,gs	gs.US,s3.us-east-1,ncbi.public	NA	NA	NA	SRX5415194	Illumina HiSeq 2500	cell line	RNASeq-HNT34_HAEMATOPOIETIC_AND_LYMPHOID_TISSUE	PAIRED	cDNA	TRANSCRIPTOMIC	Homo sapiens	ILLUMINA	2019-03-27T00:00:00Z	HNT34_HAEMATOPOIETIC_AND_LYMPHOID_TISSUE	cell culture	NA	SRP186687	haematopoietic_and_lymphoid_tissue
SRR8616209	44	RNA-Seq	GCA_000001405.13	202	21937680558	ATCC:HPAF-II	PRJNA523380	SAMN10987875	Human	11667127635	HPAF-II	BROAD INSTITUTE	public	bam,sra	gs,ncbi,s3	gs.US,ncbi.public,s3.us-east-1	carcinoma (ductal_carcinoma)	metastasis	Caucasian	SRX5415193	Illumina HiSeq 2500	cell line	RNASeq-HPAFII_PANCREAS	PAIRED	cDNA	TRANSCRIPTOMIC	Homo sapiens	ILLUMINA	2019-03-27T00:00:00Z	HPAFII_PANCREAS	cell culture	male	SRP186687	pancreas
SRR8616210	14	RNA-Seq	GCA_000001405.13	202	21409816380	DSMZ:HPB-ALL	PRJNA523380	SAMN10988462	Human	10530848616	HPB-ALL	BROAD INSTITUTE	public	bam,sra	gs,ncbi,s3	gs.US,ncbi.public,s3.us-east-1	lymphoid_neoplasm (acute_lymphoblastic_T_cell_leukaemia)	primary	Asian	SRX5415192	Illumina HiSeq 2500	cell line	RNASeq-HPBALL_HAEMATOPOIETIC_AND_LYMPHOID_TISSUE	PAIRED	cDNA	TRANSCRIPTOMIC	Homo sapiens	ILLUMINA	2019-03-27T00:00:00Z	HPBALL_HAEMATOPOIETIC_AND_LYMPHOID_TISSUE	cell culture	male	SRP186687	haematopoietic_and_lymphoid_tissue
SRR8616211	13	RNA-Seq	GCA_000001405.13	202	17467028678	GNF	PRJNA523380	SAMN10987602	Human	8545445484	HOS	BROAD INSTITUTE	public	sra,bam	gs,ncbi,s3	s3.us-east-1,gs.US,ncbi.public	osteosarcoma	primary	Caucasian	SRX5415191	Illumina HiSeq 2500	cell line	RNASeq-HOS_BONE	PAIRED	cDNA	TRANSCRIPTOMIC	Homo sapiens	ILLUMINA	2019-03-27T00:00:00Z	HOS_BONE	cell culture	female	SRP186687	bone
SRR8616212	64	RNA-Seq	GCA_000001405.13	202	16478032234	ATCC:HPAC	PRJNA523380	SAMN10987698	Human	8746438887	HPAC	BROAD INSTITUTE	public	sra,bam	ncbi,s3,gs	s3.us-east-1,ncbi.public,gs.US	carcinoma (ductal_carcinoma)	primary	Caucasian	SRX5415190	Illumina HiSeq 2500	cell line	RNASeq-HPAC_PANCREAS	PAIRED	cDNA	TRANSCRIPTOMIC	Homo sapiens	ILLUMINA	2019-03-27T00:00:00Z	HPAC_PANCREAS	cell culture	female	SRP186687	pancreas
SRR8616213	NA	RNA-Seq	GCA_000001405.13	202	18674012008	NA	PRJNA523380	SAMN10988395	Human	9971797726	EWS502	BROAD INSTITUTE	public	bam,sra	s3,gs,ncbi	ncbi.public,s3.us-east-1,gs.US	Ewings_sarcoma-peripheral_primitive_neuroectodermal_tumour	NA	Caucasian	SRX5415189	Illumina HiSeq 2500	cell line	RNASeq-EWS502_BONE	PAIRED	cDNA	TRANSCRIPTOMIC	Homo sapiens	ILLUMINA	2019-03-27T00:00:00Z	EWS502_BONE	cell culture	NA	SRP186687	bone
SRR8616214	NA	RNA-Seq	GCA_000001405.13	202	16144849798	NA	PRJNA523380	SAMN10988420	Human	8651355286	EW8	BROAD INSTITUTE	public	bam,sra	s3,gs,ncbi	gs.US,s3.us-east-1,ncbi.public	Ewings_sarcoma-peripheral_primitive_neuroectodermal_tumour	NA	Caucasian	SRX5415188	Illumina HiSeq 2500	cell line	RNASeq-EW8_BONE	PAIRED	cDNA	TRANSCRIPTOMIC	Homo sapiens	ILLUMINA	2019-03-27T00:00:00Z	EW8_BONE	cell culture	NA	SRP186687	bone
SRR8616215	56	RNA-Seq	GCA_000001405.13	202	14494665338	NIBRI	PRJNA523380	SAMN10987898	Human	7290085250	FaDu	BROAD INSTITUTE	public	sra,bam	ncbi,gs,s3	gs.US,ncbi.public,s3.us-east-1	carcinoma (squamous_cell_carcinoma)	primary	Caucasian	SRX5415187	Illumina HiSeq 2500	cell line	RNASeq-FADU_UPPER_AERODIGESTIVE_TRACT	PAIRED	cDNA	TRANSCRIPTOMIC	Homo sapiens	ILLUMINA	2019-03-27T00:00:00Z	FADU_UPPER_AERODIGESTIVE_TRACT	cell culture	male	SRP186687	upper_aerodigestive_tract
SRR8616216	68	RNA-Seq	GCA_000001405.13	202	18237398906	DSMZ:F-36P	PRJNA523380	SAMN10989568	Human	9735101934	F-36P	BROAD INSTITUTE	public	sra,bam	s3,gs,ncbi	ncbi.public,s3.us-east-1,gs.US	haematopoietic_neoplasm (acute_myeloid_leukaemia\, M6)	metastasis	Asian	SRX5415186	Illumina HiSeq 2500	cell line	RNASeq-F36P_HAEMATOPOIETIC_AND_LYMPHOID_TISSUE	PAIRED	cDNA	TRANSCRIPTOMIC	Homo sapiens	ILLUMINA	2019-03-27T00:00:00Z	F36P_HAEMATOPOIETIC_AND_LYMPHOID_TISSUE	cell culture	male	SRP186687	haematopoietic_and_lymphoid_tissue
SRR8616217	57	RNA-Seq	GCA_000001405.13	202	25384979834	DSMZ:EPLC-272H	PRJNA523380	SAMN10987954	Human	12742773067	EPLC-272H	BROAD INSTITUTE	public	sra,bam	ncbi,s3,gs	s3.us-east-1,ncbi.public,gs.US	carcinoma (squamous_cell_carcinoma)	primary	Caucasian	SRX5415185	Illumina HiSeq 2500	cell line	RNASeq-EPLC272H_LUNG	PAIRED	cDNA	TRANSCRIPTOMIC	Homo sapiens	ILLUMINA	2019-03-27T00:00:00Z	EPLC272H_LUNG	cell culture	male	SRP186687	lung
SRR8616218	33	RNA-Seq	GCA_000001405.13	202	26505460098	DSMZ:EOL-1	PRJNA523380	SAMN10988490	Human	14924496419	EOL-1	BROAD INSTITUTE	public	bam,sra	ncbi,s3,gs	s3.us-east-1,gs.US,ncbi.public	haematopoietic_neoplasm (acute_myeloid_leukaemia\, M5)	primary	Caucasian	SRX5415184	Illumina HiSeq 2500	cell line	RNASeq-EOL1_HAEMATOPOIETIC_AND_LYMPHOID_TISSUE	PAIRED	cDNA	TRANSCRIPTOMIC	Homo sapiens	ILLUMINA	2019-03-27T00:00:00Z	EOL1_HAEMATOPOIETIC_AND_LYMPHOID_TISSUE	cell culture	male	SRP186687	haematopoietic_and_lymphoid_tissue
SRR8616219	76	RNA-Seq	GCA_000001405.13	202	17324421930	NA	PRJNA523380	SAMN10988289	Human	8602957005	ESS-1	BROAD INSTITUTE	public	bam,sra	s3,ncbi,gs	s3.us-east-1,gs.US,ncbi.public	carcinoma (carcinosarcoma-malignant_mesodermal_mixed_tumour)	primary	Caucasian	SRX5415183	Illumina HiSeq 2500	cell line	RNASeq-ESS1_ENDOMETRIUM	PAIRED	cDNA	TRANSCRIPTOMIC	Homo sapiens	ILLUMINA	2019-03-27T00:00:00Z	ESS1_ENDOMETRIUM	cell culture	female	SRP186687	endometrium
SRR8616220	47	RNA-Seq	GCA_000001405.13	202	21163489702	ATCC:ES-2	PRJNA523380	SAMN10988319	Human	11631683377	ES-2	BROAD INSTITUTE	public	bam,sra	ncbi,s3,gs	ncbi.public,s3.us-east-1,gs.US	carcinoma (clear_cell_carcinoma)	primary	Caucasian	SRX5415182	Illumina HiSeq 2500	cell line	RNASeq-ES2_OVARY	PAIRED	cDNA	TRANSCRIPTOMIC	Homo sapiens	ILLUMINA	2019-03-27T00:00:00Z	ES2_OVARY	cell culture	female	SRP186687	ovary
SRR8618300	NA	RNA-Seq	GCA_000001405.13	198	7981472612	DSMZ:VM-CUB1	PRJNA523380	SAMN10988492	Human	3734214672	VM-CUB1	BROAD INSTITUTE	public	sra,bam	ncbi,s3,gs	gs.US,ncbi.public,s3.us-east-1	carcinoma (transitional_cell_carcinoma)	primary	Caucasian	SRX5417216	Illumina HiSeq 2500	cell line	RNASeq-VMCUB1_URINARY_TRACT	PAIRED	cDNA	TRANSCRIPTOMIC	Homo sapiens	ILLUMINA	2019-03-27T00:00:00Z	VMCUB1_URINARY_TRACT	cell culture	male	SRP186687	urinary_tract
SRR8618301	63	RNA-Seq	GCA_000001405.13	202	12039337966	ATCC:ZR-75-1	PRJNA523380	SAMN10988134	Human	5730856855	ZR-75-1	BROAD INSTITUTE	public	bam,sra	ncbi,gs,s3	gs.US,ncbi.public,s3.us-east-1	carcinoma (ductal_carcinoma)	metastasis	Caucasian	SRX5417215	Illumina HiSeq 2500	cell line	RNASeq-ZR751_BREAST	PAIRED	cDNA	TRANSCRIPTOMIC	Homo sapiens	ILLUMINA	2019-03-27T00:00:00Z	ZR751_BREAST	cell culture	female	SRP186687	breast
SRR8618302	NA	RNA-Seq	GCA_000001405.13	202	13775598464	GNF	PRJNA523380	SAMN10987974	Human	6645802365	WM-983B	BROAD INSTITUTE	public	sra,bam	gs,ncbi,s3	gs.US,s3.us-east-1,ncbi.public	malignant_melanoma	primary	Caucasian	SRX5417214	Illumina HiSeq 2500	cell line	RNASeq-WM983B_SKIN	PAIRED	cDNA	TRANSCRIPTOMIC	Homo sapiens	ILLUMINA	2019-03-27T00:00:00Z	WM983B_SKIN	cell culture	NA	SRP186687	skin
SRR8618303	NA	RNA-Seq	GCA_000001405.13	202	11509818398	GNF	PRJNA523380	SAMN10987992	Human	5545350448	WM-88	BROAD INSTITUTE	public	sra,bam	s3,gs,ncbi	s3.us-east-1,gs.US,ncbi.public	malignant_melanoma	primary	Caucasian	SRX5417213	Illumina HiSeq 2500	cell line	RNASeq-WM88_SKIN	PAIRED	cDNA	TRANSCRIPTOMIC	Homo sapiens	ILLUMINA	2019-03-27T00:00:00Z	WM88_SKIN	cell culture	NA	SRP186687	skin
SRR8618304	47	RNA-Seq	GCA_000001405.13	202	16492482506	GNF	PRJNA523380	SAMN10988534	Human	8291017371	ZR-75-30	BROAD INSTITUTE	public	sra,bam	ncbi,gs,s3	ncbi.public,s3.us-east-1,gs.US	carcinoma (ductal_carcinoma)	metastasis	African_american	SRX5417212	Illumina HiSeq 2500	cell line	RNASeq-ZR7530_BREAST	PAIRED	cDNA	TRANSCRIPTOMIC	Homo sapiens	ILLUMINA	2019-03-27T00:00:00Z	ZR7530_BREAST	cell culture	female	SRP186687	breast
SRR8618305	59	RNA-Seq	GCA_000001405.13	202	27508630276	ATCC:VCaP	PRJNA523380	SAMN10988209	Human	13991231805	VCaP	BROAD INSTITUTE	public	sra,bam	ncbi,gs,s3	s3.us-east-1,ncbi.public,gs.US	carcinoma (adenocarcinoma)	metastasis	Caucasian	SRX5417211	Illumina HiSeq 2500	cell line	RNASeq-VCAP_PROSTATE	PAIRED	cDNA	TRANSCRIPTOMIC	Homo sapiens	ILLUMINA	2019-03-27T00:00:00Z	VCAP_PROSTATE	cell culture	male	SRP186687	prostate
SRR8618306	43	RNA-Seq	GCA_000001405.13	202	12849129908	DSMZ:YAPC	PRJNA523380	SAMN10988032	Human	6177272611	YAPC	BROAD INSTITUTE	public	sra,bam	s3,ncbi,gs	gs.US,s3.us-east-1,ncbi.public	carcinoma	metastasis	Asian	SRX5417210	Illumina HiSeq 2500	cell line	RNASeq-YAPC_PANCREAS	PAIRED	cDNA	TRANSCRIPTOMIC	Homo sapiens	ILLUMINA	2019-03-27T00:00:00Z	YAPC_PANCREAS	cell culture	male	SRP186687	pancreas
SRR8618307	41	RNA-Seq	GCA_000001405.13	202	10002189580	DSMZ:WSU-DLCL2	PRJNA523380	SAMN10989570	Human	4696713405	WSU-DLCL2	BROAD INSTITUTE	public	bam,sra	ncbi,s3,gs	s3.us-east-1,gs.US,ncbi.public	lymphoid_neoplasm (diffuse_large_B_cell_lymphoma)	metastasis	Caucasian	SRX5417209	Illumina HiSeq 2500	cell line	RNASeq-WSUDLCL2_HAEMATOPOIETIC_AND_LYMPHOID_TISSUE	PAIRED	cDNA	TRANSCRIPTOMIC	Homo sapiens	ILLUMINA	2019-03-27T00:00:00Z	WSUDLCL2_HAEMATOPOIETIC_AND_LYMPHOID_TISSUE	cell culture	male	SRP186687	haematopoietic_and_lymphoid_tissue
SRR8618308	39	RNA-Seq	GCA_000001405.13	198	9297528906	KCLB:YD-15	PRJNA523380	SAMN10987726	Human	4372185733	YD-15	BROAD INSTITUTE	public	sra,bam	gs,s3,ncbi	s3.us-east-1,ncbi.public,gs.US	carcinoma (mucoepidermoid_carcinoma)	primary	Asian	SRX5417208	Illumina HiSeq 2500	cell line	RNASeq-YD15_SALIVARY_GLAND	PAIRED	cDNA	TRANSCRIPTOMIC	Homo sapiens	ILLUMINA	2019-03-27T00:00:00Z	YD15_SALIVARY_GLAND	cell culture	male	SRP186687	salivary_gland
SRR8618309	67	RNA-Seq	GCA_000001405.13	202	10874760698	KCLB:YD-10B	PRJNA523380	SAMN10987734	Human	5272969612	YD-10B	BROAD INSTITUTE	public	bam,sra	gs,s3,ncbi	gs.US,ncbi.public,s3.us-east-1	carcinoma (squamous_cell_carcinoma)	primary	Asian	SRX5417207	Illumina HiSeq 2500	cell line	RNASeq-YD10B_UPPER_AERODIGESTIVE_TRACT	PAIRED	cDNA	TRANSCRIPTOMIC	Homo sapiens	ILLUMINA	2019-03-27T00:00:00Z	YD10B_UPPER_AERODIGESTIVE_TRACT	cell culture	male	SRP186687	upper_aerodigestive_tract
SRR8618310	46	RNA-Seq	GCA_000001405.13	202	13642447134	KCLB:YD-8	PRJNA523380	SAMN10988082	Human	6742274731	YD-8	BROAD INSTITUTE	public	sra,bam	ncbi,gs,s3	s3.us-east-1,ncbi.public,gs.US	carcinoma (squamous_cell_carcinoma)	primary	Asian	SRX5417206	Illumina HiSeq 2500	cell line	RNASeq-YD8_UPPER_AERODIGESTIVE_TRACT	PAIRED	cDNA	TRANSCRIPTOMIC	Homo sapiens	ILLUMINA	2019-03-27T00:00:00Z	YD8_UPPER_AERODIGESTIVE_TRACT	cell culture	female	SRP186687	upper_aerodigestive_tract
SRR8618311	67	RNA-Seq	GCA_000001405.13	198	9500491828	KCLB:YD-38	PRJNA523380	SAMN10988077	Human	4495457134	YD-38	BROAD INSTITUTE	public	sra,bam	gs,s3,ncbi	ncbi.public,s3.us-east-1,gs.US	carcinoma (squamous_cell_carcinoma)	primary	Asian	SRX5417205	Illumina HiSeq 2500	cell line	RNASeq-YD38_UPPER_AERODIGESTIVE_TRACT	PAIRED	cDNA	TRANSCRIPTOMIC	Homo sapiens	ILLUMINA	2019-03-27T00:00:00Z	YD38_UPPER_AERODIGESTIVE_TRACT	cell culture	male	SRP186687	upper_aerodigestive_tract
SRR8618312	NA	RNA-Seq	GCA_000001405.13	202	15490302734	GNF	PRJNA523380	SAMN10988288	Human	7730136450	YKG1	BROAD INSTITUTE	public	bam,sra	s3,ncbi,gs	ncbi.public,gs.US,s3.us-east-1	glioma (astrocytoma_Grade_IV\, glioblastoma_multiforme)	primary	Asian	SRX5417204	Illumina HiSeq 2500	cell line	RNASeq-YKG1_CENTRAL_NERVOUS_SYSTEM	PAIRED	cDNA	TRANSCRIPTOMIC	Homo sapiens	ILLUMINA	2019-03-27T00:00:00Z	YKG1_CENTRAL_NERVOUS_SYSTEM	cell culture	female	SRP186687	central_nervous_system
SRR8618313	40	RNA-Seq	GCA_000001405.13	202	9557985520	HSSRB	PRJNA523380	SAMN10987935	Human	4531611361	YH-13	BROAD INSTITUTE	public	sra,bam	s3,ncbi,gs	s3.us-east-1,ncbi.public,gs.US	glioma (astrocytoma_Grade_IV\, glioblastoma_multiforme)	primary	Asian	SRX5417203	Illumina HiSeq 2500	cell line	RNASeq-YH13_CENTRAL_NERVOUS_SYSTEM	PAIRED	cDNA	TRANSCRIPTOMIC	Homo sapiens	ILLUMINA	2019-03-27T00:00:00Z	YH13_CENTRAL_NERVOUS_SYSTEM	cell culture	male	SRP186687	central_nervous_system
SRR8618314	58	RNA-Seq	GCA_000001405.13	202	9467302872	ATCC:WM-266-4	PRJNA523380	SAMN10988367	Human	4431507310	WM-266-4	BROAD INSTITUTE	public	sra,bam	gs,s3,ncbi	ncbi.public,gs.US,s3.us-east-1	malignant_melanoma	metastasis	Caucasian	SRX5417202	Illumina HiSeq 2500	cell line	RNASeq-WM2664_SKIN	PAIRED	cDNA	TRANSCRIPTOMIC	Homo sapiens	ILLUMINA	2019-03-27T00:00:00Z	WM2664_SKIN	cell culture	female	SRP186687	skin
SRR8618315	NA	RNA-Seq	GCA_000001405.13	202	15732031690	HSRRB	PRJNA523380	SAMN10988252	Human	7711539104	VMRC-RCZ	BROAD INSTITUTE	public	bam,sra	s3,ncbi,gs	ncbi.public,gs.US,s3.us-east-1	carcinoma (renal_cell_carcinoma)	primary	Caucasian	SRX5417201	Illumina HiSeq 2500	cell line	RNASeq-VMRCRCZ_KIDNEY	PAIRED	cDNA	TRANSCRIPTOMIC	Homo sapiens	ILLUMINA	2019-03-27T00:00:00Z	VMRCRCZ_KIDNEY	cell culture	NA	SRP186687	kidney
SRR8618316	NA	RNA-Seq	GCA_000001405.13	202	21457782088	WISTAR	PRJNA523380	SAMN10987990	Human	10730015318	WM1799	BROAD INSTITUTE	public	bam,sra	gs,s3,ncbi	s3.us-east-1,ncbi.public,gs.US	malignant_melanoma	primary	Caucasian	SRX5417200	Illumina HiSeq 2500	cell line	RNASeq-WM1799_SKIN	PAIRED	cDNA	TRANSCRIPTOMIC	Homo sapiens	ILLUMINA	2019-03-27T00:00:00Z	WM1799_SKIN	cell culture	NA	SRP186687	skin
SRR8618317	NA	RNA-Seq	GCA_000001405.13	202	10605259772	NA	PRJNA523380	SAMN10987862	Human	5087008340	VMRC-RCW	BROAD INSTITUTE	public	bam,sra	ncbi,gs,s3	s3.us-east-1,ncbi.public,gs.US	carcinoma	primary	Caucasian	SRX5417199	Illumina HiSeq 2500	cell line	RNASeq-VMRCRCW_KIDNEY	PAIRED	cDNA	TRANSCRIPTOMIC	Homo sapiens	ILLUMINA	2019-03-27T00:00:00Z	VMRCRCW_KIDNEY	cell culture	male	SRP186687	kidney
SRR8618318	59	RNA-Seq	GCA_000001405.13	202	19341981366	NA	PRJNA523380	SAMN10987773	Human	9583445609	WM-115	BROAD INSTITUTE	public	sra,bam	gs,ncbi,s3	gs.US,ncbi.public,s3.us-east-1	malignant_melanoma	primary	Caucasian	SRX5417198	Illumina HiSeq 2500	cell line	RNASeq-WM115_SKIN	PAIRED	cDNA	TRANSCRIPTOMIC	Homo sapiens	ILLUMINA	2019-03-27T00:00:00Z	WM115_SKIN	cell culture	female	SRP186687	skin
SRR8618319	NA	RNA-Seq	GCA_000001405.13	202	18326067816	WISTAR	PRJNA523380	SAMN10987987	Human	9011741343	WM-793	BROAD INSTITUTE	public	bam,sra	s3,gs,ncbi	ncbi.public,gs.US,s3.us-east-1	malignant_melanoma	primary	Caucasian	SRX5417197	Illumina HiSeq 2500	cell line	RNASeq-WM793_SKIN	PAIRED	cDNA	TRANSCRIPTOMIC	Homo sapiens	ILLUMINA	2019-03-27T00:00:00Z	WM793_SKIN	cell culture	NA	SRP186687	skin
SRR8615280	74	RNA-Seq	GCA_000001405.13	202	16713103876	DSMZ:HDLM-2	PRJNA523380	SAMN10988513	Human	7636670706	HDLM-2	BROAD INSTITUTE	public	bam,sra	s3,ncbi,gs	ncbi.public,gs.US,s3.us-east-1	lymphoid_neoplasm (Hodgkin_lymphoma)	metastasis	Caucasian	SRX5414473	Illumina HiSeq 2500	cell line	RNASeq-HDLM2_HAEMATOPOIETIC_AND_LYMPHOID_TISSUE	PAIRED	cDNA	TRANSCRIPTOMIC	Homo sapiens	ILLUMINA	2019-03-27T00:00:00Z	HDLM2_HAEMATOPOIETIC_AND_LYMPHOID_TISSUE	cell culture	male	SRP186687	haematopoietic_and_lymphoid_tissue
SRR8615292	46	RNA-Seq	GCA_000001405.13	202	24186584736	NIBRI	PRJNA523380	SAMN10988213	Human	13419881688	EFM-192A	BROAD INSTITUTE	public	sra,bam	gs,s3,ncbi	s3.us-east-1,gs.US,ncbi.public	carcinoma	metastasis	Caucasian	SRX5414461	Illumina HiSeq 2500	cell line	RNASeq-EFM192A_BREAST	PAIRED	cDNA	TRANSCRIPTOMIC	Homo sapiens	ILLUMINA	2019-03-27T00:00:00Z	EFM192A_BREAST	cell culture	female	SRP186687	breast
SRR8615293	5	RNA-Seq	GCA_000001405.13	202	23899716860	DSMZ:EM-2	PRJNA523380	SAMN10988561	Human	13323259630	EM-2	BROAD INSTITUTE	public	sra,bam	ncbi,s3,gs	ncbi.public,s3.us-east-1,gs.US	haematopoietic_neoplasm (blast_phase_chronic_myeloid_leukaemia)	primary	Caucasian	SRX5414460	Illumina HiSeq 2500	cell line	RNASeq-EM2_HAEMATOPOIETIC_AND_LYMPHOID_TISSUE	PAIRED	cDNA	TRANSCRIPTOMIC	Homo sapiens	ILLUMINA	2019-03-27T00:00:00Z	EM2_HAEMATOPOIETIC_AND_LYMPHOID_TISSUE	cell culture	female	SRP186687	haematopoietic_and_lymphoid_tissue
SRR8615300	69	RNA-Seq	GCA_000001405.13	202	12874566152	ATCC:DU 145	PRJNA523380	SAMN10988253	Human	6457973317	DU 145	BROAD INSTITUTE	public	sra,bam	s3,gs,ncbi	s3.us-east-1,gs.US,ncbi.public	carcinoma	metastasis	Caucasian	SRX5414453	Illumina HiSeq 2500	cell line	RNASeq-DU145_PROSTATE	PAIRED	cDNA	TRANSCRIPTOMIC	Homo sapiens	ILLUMINA	2019-03-27T00:00:00Z	DU145_PROSTATE	cell culture	male	SRP186687	prostate
SRR8615303	6	RNA-Seq	GCA_000001405.13	202	19076573970	DSMZ:PF-382	PRJNA523380	SAMN10988497	Human	10304979056	PF-382	BROAD INSTITUTE	public	bam,sra	gs,ncbi,s3	gs.US,ncbi.public,s3.us-east-1	lymphoid_neoplasm (acute_lymphoblastic_T_cell_leukaemia)	metastasis	Caucasian	SRX5414450	Illumina HiSeq 2500	cell line	RNASeq-PF382_HAEMATOPOIETIC_AND_LYMPHOID_TISSUE	PAIRED	cDNA	TRANSCRIPTOMIC	Homo sapiens	ILLUMINA	2019-03-27T00:00:00Z	PF382_HAEMATOPOIETIC_AND_LYMPHOID_TISSUE	cell culture	female	SRP186687	haematopoietic_and_lymphoid_tissue
SRR8615305	57	RNA-Seq	GCA_000001405.13	202	21418469252	ECACC:PE/CA-PJ49	PRJNA523380	SAMN10988008	Human	11490019970	PE/CA-PJ49	BROAD INSTITUTE	public	bam,sra	gs,ncbi,s3	ncbi.public,s3.us-east-1,gs.US	carcinoma (squamous_cell_carcinoma)	primary	Caucasian	SRX5414448	Illumina HiSeq 2500	cell line	RNASeq-PECAPJ49_UPPER_AERODIGESTIVE_TRACT	PAIRED	cDNA	TRANSCRIPTOMIC	Homo sapiens	ILLUMINA	2019-03-27T00:00:00Z	PECAPJ49_UPPER_AERODIGESTIVE_TRACT	cell culture	male	SRP186687	upper_aerodigestive_tract
SRR8615314	3	RNA-Seq	GCA_000001405.13	202	21172102982	DSMZ:NALM-1	PRJNA523380	SAMN10988498	Human	11180555889	NALM-1	BROAD INSTITUTE	public	bam,sra	s3,gs,ncbi	ncbi.public,s3.us-east-1,gs.US	haematopoietic_neoplasm (blast_phase_chronic_myeloid_leukaemia)	primary	African_american	SRX5414439	Illumina HiSeq 2500	cell line	RNASeq-NALM1_HAEMATOPOIETIC_AND_LYMPHOID_TISSUE	PAIRED	cDNA	TRANSCRIPTOMIC	Homo sapiens	ILLUMINA	2019-03-27T00:00:00Z	NALM1_HAEMATOPOIETIC_AND_LYMPHOID_TISSUE	cell culture	female	SRP186687	haematopoietic_and_lymphoid_tissue
SRR8615328	7	RNA-Seq	GCA_000001405.13	202	15281912666	GNF	PRJNA523380	SAMN10988148	Human	7484447620	Hs 840.T	BROAD INSTITUTE	public	sra,bam	s3,gs,ncbi	gs.US,ncbi.public,s3.us-east-1	other (papilloma)	benign_neoplasia	Caucasian	SRX5414425	Illumina HiSeq 2500	cell line	RNASeq-HS840T_FIBROBLAST	PAIRED	cDNA	TRANSCRIPTOMIC	Homo sapiens	ILLUMINA	2019-03-27T00:00:00Z	HS840T_FIBROBLAST	cell culture	male	SRP186687	upper_aerodigestive_tract
SRR8615331	67	RNA-Seq	GCA_000001405.13	202	20836565428	ATCC:NCI-H1092	PRJNA523380	SAMN10987995	Human	10341656297	NCI-H1092	BROAD INSTITUTE	public	sra,bam	ncbi,gs,s3	ncbi.public,gs.US,s3.us-east-1	carcinoma (small_cell_carcinoma)	metastasis	Caucasian	SRX5414422	Illumina HiSeq 2500	cell line	RNASeq-NCIH1092_LUNG	PAIRED	cDNA	TRANSCRIPTOMIC	Homo sapiens	ILLUMINA	2019-03-27T00:00:00Z	NCIH1092_LUNG	cell culture	male	SRP186687	lung
SRR8615332	NA	RNA-Seq	GCA_000001405.13	202	17079575710	NA	PRJNA523380	SAMN10988421	Human	9153060566	UOK101	BROAD INSTITUTE	public	bam,sra	gs,ncbi,s3	s3.us-east-1,ncbi.public,gs.US	carcinoma (clear_cell_renal_cell_carcinoma)	NA	Caucasian	SRX5414421	Illumina HiSeq 2500	cell line	RNASeq-UOK101_KIDNEY	PAIRED	cDNA	TRANSCRIPTOMIC	Homo sapiens	ILLUMINA	2019-03-27T00:00:00Z	UOK101_KIDNEY	cell culture	female	SRP186687	kidney
SRR8615334	NA	RNA-Seq	GCA_000001405.13	202	19922584512	ATCC:UM-UC-3	PRJNA523380	SAMN10987601	Human	9869297742	UM-UC-3	BROAD INSTITUTE	public	bam,sra	s3,ncbi,gs	ncbi.public,s3.us-east-1,gs.US	carcinoma (transitional_cell_carcinoma)	primary	Caucasian	SRX5414419	Illumina HiSeq 2500	cell line	RNASeq-UMUC3_URINARY_TRACT	PAIRED	cDNA	TRANSCRIPTOMIC	Homo sapiens	ILLUMINA	2019-03-27T00:00:00Z	UMUC3_URINARY_TRACT	cell culture	male	SRP186687	urinary_tract
SRR8615344	2	RNA-Seq	GCA_000001405.13	202	19586514284	NA	PRJNA523380	SAMN10988531	Human	9788454663	NB-1	BROAD INSTITUTE	public	sra,bam	s3,ncbi,gs	s3.us-east-1,ncbi.public,gs.US	neuroblastoma	metastasis	Asian	SRX5414409	Illumina HiSeq 2500	cell line	RNASeq-NB1_AUTONOMIC_GANGLIA	PAIRED	cDNA	TRANSCRIPTOMIC	Homo sapiens	ILLUMINA	2019-03-27T00:00:00Z	NB1_AUTONOMIC_GANGLIA	cell culture	male	SRP186687	autonomic_ganglia
SRR8615386	29	RNA-Seq	GCA_000001405.13	202	19530334852	NIBRI	PRJNA523380	SAMN10987909	Human	11026353757	GCT	BROAD INSTITUTE	public	bam,sra	gs,ncbi,s3	s3.us-east-1,ncbi.public,gs.US	malignant_fibrous_histiocytoma-pleomorphic_sarcoma	metastasis	Caucasian	SRX5414367	Illumina HiSeq 2500	cell line	RNASeq-GCT_SOFT_TISSUE	PAIRED	cDNA	TRANSCRIPTOMIC	Homo sapiens	ILLUMINA	2019-03-27T00:00:00Z	GCT_SOFT_TISSUE	cell culture	male	SRP186687	soft_tissue
SRR8615389	NA	RNA-Seq	GCA_000001405.13	202	17040334584	RIKEN:GSU	PRJNA523380	SAMN10987761	Human	8557778105	GSU	BROAD INSTITUTE	public	sra,bam	ncbi,gs,s3	ncbi.public,gs.US,s3.us-east-1	carcinoma (adenocarcinoma)	metastasis	Asian	SRX5414364	Illumina HiSeq 2500	cell line	RNASeq-GSU_STOMACH	PAIRED	cDNA	TRANSCRIPTOMIC	Homo sapiens	ILLUMINA	2019-03-27T00:00:00Z	GSU_STOMACH	cell culture	NA	SRP186687	stomach
SRR8615400	NA	RNA-Seq	GCA_000001405.13	202	16583580870	NA	PRJNA523380	SAMN10988417	Human	8833610571	LN-340	BROAD INSTITUTE	public	bam,sra	gs,s3,ncbi	ncbi.public,gs.US,s3.us-east-1	glioma (astrocytoma_Grade_IV)	NA	Caucasian	SRX5414353	Illumina HiSeq 2500	cell line	RNASeq-LN340_CENTRAL_NERVOUS_SYSTEM	PAIRED	cDNA	TRANSCRIPTOMIC	Homo sapiens	ILLUMINA	2019-03-27T00:00:00Z	LN340_CENTRAL_NERVOUS_SYSTEM	cell culture	male	SRP186687	central_nervous_system
SRR8615401	63	RNA-Seq	GCA_000001405.13	202	15120271660	DSMZ:LXF-289	PRJNA523380	SAMN10988494	Human	7096190572	LXF-289	BROAD INSTITUTE	public	bam,sra	gs,ncbi,s3	ncbi.public,s3.us-east-1,gs.US	carcinoma (adenocarcinoma)	primary	Caucasian	SRX5414352	Illumina HiSeq 2500	cell line	RNASeq-LXF289_LUNG	PAIRED	cDNA	TRANSCRIPTOMIC	Homo sapiens	ILLUMINA	2019-03-27T00:00:00Z	LXF289_LUNG	cell culture	male	SRP186687	lung
SRR8615414	56	RNA-Seq	GCA_000001405.13	202	16855743550	ATCC:Hs 294T	PRJNA523380	SAMN10988350	Human	8269952603	Hs 294T	BROAD INSTITUTE	public	bam,sra	gs,ncbi,s3	ncbi.public,s3.us-east-1,gs.US	malignant_melanoma	metastasis	Caucasian	SRX5414339	Illumina HiSeq 2500	cell line	RNASeq-HS294T_SKIN	PAIRED	cDNA	TRANSCRIPTOMIC	Homo sapiens	ILLUMINA	2019-03-27T00:00:00Z	HS294T_SKIN	cell culture	male	SRP186687	skin
SRR8615417	46	RNA-Seq	GCA_000001405.13	202	18947093384	NIBRI	PRJNA523380	SAMN10987994	Human	9354382551	Hs 255.T	BROAD INSTITUTE	public	sra,bam	s3,gs,ncbi	ncbi.public,gs.US,s3.us-east-1	carcinoma (adenocarcinoma)	primary	Caucasian	SRX5414336	Illumina HiSeq 2500	cell line	RNASeq-HS255T_FIBROBLAST	PAIRED	cDNA	TRANSCRIPTOMIC	Homo sapiens	ILLUMINA	2019-03-27T00:00:00Z	HS255T_FIBROBLAST	cell culture	female	SRP186687	large_intestine
SRR8615418	44	RNA-Seq	GCA_000001405.13	202	17995434822	ATCC:Hs 606.T	PRJNA523380	SAMN10988335	Human	8843159993	Hs 606.T	BROAD INSTITUTE	public	bam,sra	ncbi,gs,s3	s3.us-east-1,ncbi.public,gs.US	carcinoma	primary	Caucasian	SRX5414335	Illumina HiSeq 2500	cell line	RNASeq-HS606T_FIBROBLAST	PAIRED	cDNA	TRANSCRIPTOMIC	Homo sapiens	ILLUMINA	2019-03-27T00:00:00Z	HS606T_FIBROBLAST	cell culture	female	SRP186687	breast
SRR8615424	16	RNA-Seq	GCA_000001405.13	202	17930413850	NA	PRJNA523380	SAMN10988167	Human	8765207455	Hs 616.T	BROAD INSTITUTE	public	bam,sra	ncbi,s3,gs	s3.us-east-1,gs.US,ncbi.public	lymphoid_neoplasm (Hodgkin_lymphoma)	primary	Caucasian	SRX5414329	Illumina HiSeq 2500	cell line	RNASeq-HS616T_FIBROBLAST	PAIRED	cDNA	TRANSCRIPTOMIC	Homo sapiens	ILLUMINA	2019-03-27T00:00:00Z	HS616T_FIBROBLAST	cell culture	male	SRP186687	haematopoietic_and_lymphoid_tissue
SRR8615425	62	RNA-Seq	GCA_000001405.13	202	18106803886	ECAAC	PRJNA523380	SAMN10987871	Human	9084204831	COR-L23	BROAD INSTITUTE	public	bam,sra	s3,gs,ncbi	ncbi.public,s3.us-east-1,gs.US	carcinoma (large_cell_carcinoma)	metastasis	Caucasian	SRX5414328	Illumina HiSeq 2500	cell line	RNASeq-CORL23_LUNG	PAIRED	cDNA	TRANSCRIPTOMIC	Homo sapiens	ILLUMINA	2019-03-27T00:00:00Z	CORL23_LUNG	cell culture	male	SRP186687	lung
SRR8615436	65	RNA-Seq	GCA_000001405.13	202	16149362882	ATCC:Panc 03.27	PRJNA523380	SAMN10988317	Human	8113516068	Panc 03.27	BROAD INSTITUTE	public	bam,sra	ncbi,s3,gs	ncbi.public,gs.US,s3.us-east-1	carcinoma (ductal_carcinoma)	primary	Caucasian	SRX5414317	Illumina HiSeq 2500	cell line	RNASeq-PANC0327_PANCREAS	PAIRED	cDNA	TRANSCRIPTOMIC	Homo sapiens	ILLUMINA	2019-03-27T00:00:00Z	PANC0327_PANCREAS	cell culture	female	SRP186687	pancreas
SRR8615455	NA	RNA-Seq	GCA_000001405.13	202	18151223686	ATCC:HCC4006	PRJNA523380	SAMN10988526	Human	8893294548	HCC4006	BROAD INSTITUTE	public	bam,sra	s3,gs,ncbi	gs.US,ncbi.public,s3.us-east-1	carcinoma (adenocarcinoma)	metastasis	Caucasian	SRX5414298	Illumina HiSeq 2500	cell line	RNASeq-HCC4006_LUNG	PAIRED	cDNA	TRANSCRIPTOMIC	Homo sapiens	ILLUMINA	2019-03-27T00:00:00Z	HCC4006_LUNG	cell culture	male	SRP186687	lung
SRR8615463	14	RNA-Seq	GCA_000001405.13	202	10789977460	ATCC:TE 441.T	PRJNA523380	SAMN10988530	Human	5149520998	TE 441.T	BROAD INSTITUTE	public	sra,bam	ncbi,gs,s3	s3.us-east-1,ncbi.public,gs.US	rhabdomyosarcoma	primary	African_american	SRX5414290	Illumina HiSeq 2500	cell line	RNASeq-TE441T_SOFT_TISSUE	PAIRED	cDNA	TRANSCRIPTOMIC	Homo sapiens	ILLUMINA	2019-03-27T00:00:00Z	TE441T_SOFT_TISSUE	cell culture	female	SRP186687	soft_tissue
SRR8615468	1.67	RNA-Seq	GCA_000001405.13	202	20902267140	GNF	PRJNA523380	SAMN10988150	Human	10449552475	TE 617.T	BROAD INSTITUTE	public	sra,bam	gs,s3,ncbi	gs.US,ncbi.public,s3.us-east-1	rhabdomyosarcoma	primary	Caucasian	SRX5414285	Illumina HiSeq 2500	cell line	RNASeq-TE617T_SOFT_TISSUE	PAIRED	cDNA	TRANSCRIPTOMIC	Homo sapiens	ILLUMINA	2019-03-27T00:00:00Z	TE617T_SOFT_TISSUE	cell culture	female	SRP186687	soft_tissue
SRR8615472	57	RNA-Seq	GCA_000001405.13	202	26673244732	KCLB:SNU-886	PRJNA523380	SAMN10988057	Human	13352908138	SNU-886	BROAD INSTITUTE	public	sra,bam	ncbi,s3,gs	gs.US,ncbi.public,s3.us-east-1	carcinoma (hepatocellular_carcinoma)	primary	Asian	SRX5414281	Illumina HiSeq 2500	cell line	RNASeq-SNU886_LIVER	PAIRED	cDNA	TRANSCRIPTOMIC	Homo sapiens	ILLUMINA	2019-03-27T00:00:00Z	SNU886_LIVER	cell culture	male	SRP186687	liver
SRR8615478	55	RNA-Seq	GCA_000001405.13	202	22962422720	KCLB:SNU-8	PRJNA523380	SAMN10988094	Human	12388136047	SNU-8	BROAD INSTITUTE	public	sra,bam	s3,ncbi,gs	ncbi.public,gs.US,s3.us-east-1	carcinoma (adenocarcinoma)	primary	Asian	SRX5414275	Illumina HiSeq 2500	cell line	RNASeq-SNU8_OVARY	PAIRED	cDNA	TRANSCRIPTOMIC	Homo sapiens	ILLUMINA	2019-03-27T00:00:00Z	SNU8_OVARY	cell culture	female	SRP186687	ovary
SRR8615496	NA	RNA-Seq	GCA_000001405.13	202	17308177494	NA	PRJNA523380	SAMN10989585	Human	9285947673	SKNO-1	BROAD INSTITUTE	public	sra,bam	s3,gs,ncbi	ncbi.public,gs.US,s3.us-east-1	haematopoietic_neoplasm (acute_myeloid_leukaemia)	NA	Asian	SRX5414257	Illumina HiSeq 2500	cell line	RNASeq-SKNO1_HAEMATOPOIETIC_AND_LYMPHOID_TISSUE	PAIRED	cDNA	TRANSCRIPTOMIC	Homo sapiens	ILLUMINA	2019-03-27T00:00:00Z	SKNO1_HAEMATOPOIETIC_AND_LYMPHOID_TISSUE	cell culture	NA	SRP186687	haematopoietic_and_lymphoid_tissue
SRR8615497	14	RNA-Seq	GCA_000001405.13	202	21584705758	ATCC:SK-N-MC	PRJNA523380	SAMN10987896	Human	11599077139	SK-N-MC	BROAD INSTITUTE	public	bam,sra	gs,ncbi,s3	s3.us-east-1,gs.US,ncbi.public	Ewings_sarcoma-peripheral_primitive_neuroectodermal_tumour	metastasis	Caucasian	SRX5414256	Illumina HiSeq 2500	cell line	RNASeq-SKNMC_BONE	PAIRED	cDNA	TRANSCRIPTOMIC	Homo sapiens	ILLUMINA	2019-03-27T00:00:00Z	SKNMC_BONE	cell culture	female	SRP186687	bone
SRR8615509	27	RNA-Seq	GCA_000001405.13	202	20421075264	DSMZ:OCI-LY-19	PRJNA523380	SAMN10988474	Human	10851370590	OCI-LY-19	BROAD INSTITUTE	public	sra,bam	gs,s3,ncbi	ncbi.public,gs.US,s3.us-east-1	lymphoid_neoplasm (diffuse_large_B_cell_lymphoma)	primary	Caucasian	SRX5414244	Illumina HiSeq 2500	cell line	RNASeq-OCILY19_HAEMATOPOIETIC_AND_LYMPHOID_TISSUE	PAIRED	cDNA	TRANSCRIPTOMIC	Homo sapiens	ILLUMINA	2019-03-27T00:00:00Z	OCILY19_HAEMATOPOIETIC_AND_LYMPHOID_TISSUE	cell culture	female	SRP186687	haematopoietic_and_lymphoid_tissue
SRR8615510	77	RNA-Seq	GCA_000001405.13	202	17605214858	DSMZ:OCI-AML5	PRJNA523380	SAMN10988502	Human	8840019091	OCI-AML5	BROAD INSTITUTE	public	sra,bam	ncbi,gs,s3	gs.US,ncbi.public,s3.us-east-1	haematopoietic_neoplasm (acute_myeloid_leukaemia\, M4)	primary	Caucasian	SRX5414243	Illumina HiSeq 2500	cell line	RNASeq-OCIAML5_HAEMATOPOIETIC_AND_LYMPHOID_TISSUE	PAIRED	cDNA	TRANSCRIPTOMIC	Homo sapiens	ILLUMINA	2019-03-27T00:00:00Z	OCIAML5_HAEMATOPOIETIC_AND_LYMPHOID_TISSUE	cell culture	male	SRP186687	haematopoietic_and_lymphoid_tissue
SRR8615512	65	RNA-Seq	GCA_000001405.13	202	18580886978	DSMZ:OCI-AML2	PRJNA523380	SAMN10988499	Human	9894008135	OCI-AML2	BROAD INSTITUTE	public	sra,bam	s3,gs,ncbi	ncbi.public,gs.US,s3.us-east-1	haematopoietic_neoplasm (acute_myeloid_leukaemia\, M4)	primary	Caucasian	SRX5414241	Illumina HiSeq 2500	cell line	RNASeq-OCIAML2_HAEMATOPOIETIC_AND_LYMPHOID_TISSUE	PAIRED	cDNA	TRANSCRIPTOMIC	Homo sapiens	ILLUMINA	2019-03-27T00:00:00Z	OCIAML2_HAEMATOPOIETIC_AND_LYMPHOID_TISSUE	cell culture	male	SRP186687	haematopoietic_and_lymphoid_tissue
SRR8615517	50	RNA-Seq	GCA_000001405.13	202	23964865496	NIBRI	PRJNA523380	SAMN10987950	Human	12757303516	MJ	BROAD INSTITUTE	public	bam,sra	ncbi,gs,s3	gs.US,ncbi.public,s3.us-east-1	lymphoid_neoplasm (mycosis_fungoides-Sezary_syndrome)	primary	Caucasian	SRX5414236	Illumina HiSeq 2500	cell line	RNASeq-MJ_HAEMATOPOIETIC_AND_LYMPHOID_TISSUE	PAIRED	cDNA	TRANSCRIPTOMIC	Homo sapiens	ILLUMINA	2019-03-27T00:00:00Z	MJ_HAEMATOPOIETIC_AND_LYMPHOID_TISSUE	cell culture	male	SRP186687	haematopoietic_and_lymphoid_tissue
SRR8615520	64	RNA-Seq	GCA_000001405.13	202	23732755376	GNF	PRJNA523380	SAMN10988480	Human	12478064726	Mino	BROAD INSTITUTE	public	sra,bam	gs,ncbi,s3	gs.US,ncbi.public,s3.us-east-1	lymphoid_neoplasm (mantle_cell_lymphoma)	primary	Caucasian	SRX5414233	Illumina HiSeq 2500	cell line	RNASeq-MINO_HAEMATOPOIETIC_AND_LYMPHOID_TISSUE	PAIRED	cDNA	TRANSCRIPTOMIC	Homo sapiens	ILLUMINA	2019-03-27T00:00:00Z	MINO_HAEMATOPOIETIC_AND_LYMPHOID_TISSUE	cell culture	male	SRP186687	haematopoietic_and_lymphoid_tissue
SRR8615522	4	RNA-Seq	GCA_000001405.13	202	20956381324	DSMZ:MHH-NB-11	PRJNA523380	SAMN10988427	Human	11071908304	MHH-NB-11	BROAD INSTITUTE	public	bam,sra	ncbi,gs,s3	ncbi.public,gs.US,s3.us-east-1	neuroblastoma	metastasis	Caucasian	SRX5414231	Illumina HiSeq 2500	cell line	RNASeq-MHHNB11_AUTONOMIC_GANGLIA	PAIRED	cDNA	TRANSCRIPTOMIC	Homo sapiens	ILLUMINA	2019-03-27T00:00:00Z	MHHNB11_AUTONOMIC_GANGLIA	cell culture	male	SRP186687	autonomic_ganglia
SRR8615523	11	RNA-Seq	GCA_000001405.13	202	20201491972	DSMZ:MHH-CALL-3	PRJNA523380	SAMN10988500	Human	10699619397	MHH-CALL-3	BROAD INSTITUTE	public	sra,bam	ncbi,s3,gs	s3.us-east-1,gs.US,ncbi.public	lymphoid_neoplasm (acute_lymphoblastic_B_cell_leukaemia)	primary	Caucasian	SRX5414230	Illumina HiSeq 2500	cell line	RNASeq-MHHCALL3_HAEMATOPOIETIC_AND_LYMPHOID_TISSUE	PAIRED	cDNA	TRANSCRIPTOMIC	Homo sapiens	ILLUMINA	2019-03-27T00:00:00Z	MHHCALL3_HAEMATOPOIETIC_AND_LYMPHOID_TISSUE	cell culture	female	SRP186687	haematopoietic_and_lymphoid_tissue
SRR8615527	76	RNA-Seq	GCA_000001405.13	202	9953194076	DSMZ:CAL-78	PRJNA523380	SAMN10988508	Human	4754864411	CAL-78	BROAD INSTITUTE	public	sra,bam	gs,ncbi,s3	ncbi.public,gs.US,s3.us-east-1	chondrosarcoma (dedifferentiated)	primary	Caucasian	SRX5414226	Illumina HiSeq 2500	cell line	RNASeq-CAL78_BONE	PAIRED	cDNA	TRANSCRIPTOMIC	Homo sapiens	ILLUMINA	2019-03-27T00:00:00Z	CAL78_BONE	cell culture	male	SRP186687	bone
SRR8615531	61	RNA-Seq	GCA_000001405.13	202	23749669442	ATCC:Calu-6	PRJNA523380	SAMN10987791	Human	13306495478	Calu-6	BROAD INSTITUTE	public	sra,bam	gs,s3,ncbi	s3.us-east-1,gs.US,ncbi.public	carcinoma (undifferentiated_carcinoma)	primary	Caucasian	SRX5414222	Illumina HiSeq 2500	cell line	RNASeq-CALU6_LUNG	PAIRED	cDNA	TRANSCRIPTOMIC	Homo sapiens	ILLUMINA	2019-03-27T00:00:00Z	CALU6_LUNG	cell culture	female	SRP186687	lung
SRR8615534	25	RNA-Seq	GCA_000001405.13	202	20116266556	NIBRI	PRJNA523380	SAMN10988517	Human	11250690457	Calu-3	BROAD INSTITUTE	public	bam,sra	ncbi,s3,gs	ncbi.public,s3.us-east-1,gs.US	carcinoma (adenocarcinoma)	metastasis	Caucasian	SRX5414219	Illumina HiSeq 2500	cell line	RNASeq-CALU3_LUNG	PAIRED	cDNA	TRANSCRIPTOMIC	Homo sapiens	ILLUMINA	2019-03-27T00:00:00Z	CALU3_LUNG	cell culture	male	SRP186687	lung
SRR8615570	62	RNA-Seq	GCA_000001405.13	202	22811399036	KCLB:SNU-1066	PRJNA523380	SAMN10987965	Human	12260929874	SNU-1066	BROAD INSTITUTE	public	sra,bam	s3,gs,ncbi	gs.US,s3.us-east-1,ncbi.public	carcinoma (squamous_cell_carcinoma)	primary	Asian	SRX5414830	Illumina HiSeq 2500	cell line	RNASeq-SNU1066_UPPER_AERODIGESTIVE_TRACT	PAIRED	cDNA	TRANSCRIPTOMIC	Homo sapiens	ILLUMINA	2019-03-27T00:00:00Z	SNU1066_UPPER_AERODIGESTIVE_TRACT	cell culture	male	SRP186687	upper_aerodigestive_tract
SRR8615592	19	RNA-Seq	GCA_000001405.13	202	21783230954	NIBRI	PRJNA523380	SAMN10987904	Human	11723123756	RD-ES	BROAD INSTITUTE	public	bam,sra	gs,ncbi,s3	s3.us-east-1,ncbi.public,gs.US	Ewings_sarcoma-peripheral_primitive_neuroectodermal_tumour	primary	Caucasian	SRX5414808	Illumina HiSeq 2500	cell line	RNASeq-RDES_BONE	PAIRED	cDNA	TRANSCRIPTOMIC	Homo sapiens	ILLUMINA	2019-03-27T00:00:00Z	RDES_BONE	cell culture	male	SRP186687	bone
SRR8615595	7	RNA-Seq	GCA_000001405.13	202	25215147324	ATCC:RD	PRJNA523380	SAMN10988441	Human	13558563740	RD	BROAD INSTITUTE	public	sra,bam	ncbi,s3,gs	ncbi.public,gs.US,s3.us-east-1	rhabdomyosarcoma (embryonal)	primary	Caucasian	SRX5414805	Illumina HiSeq 2500	cell line	RNASeq-RD_SOFT_TISSUE	PAIRED	cDNA	TRANSCRIPTOMIC	Homo sapiens	ILLUMINA	2019-03-27T00:00:00Z	RD_SOFT_TISSUE	cell culture	female	SRP186687	soft_tissue
SRR8615603	62	RNA-Seq	GCA_000001405.13	202	23456505226	ATCC:NCI-H1944	PRJNA523380	SAMN10988538	Human	12368317900	NCI-H1944	BROAD INSTITUTE	public	bam,sra	gs,ncbi,s3	ncbi.public,gs.US,s3.us-east-1	carcinoma (non_small_cell_carcinoma)	metastasis	Caucasian	SRX5414797	Illumina HiSeq 2500	cell line	RNASeq-NCIH1944_LUNG	PAIRED	cDNA	TRANSCRIPTOMIC	Homo sapiens	ILLUMINA	2019-03-27T00:00:00Z	NCIH1944_LUNG	cell culture	female	SRP186687	lung
SRR8615605	58	RNA-Seq	GCA_000001405.13	202	19163890086	GNF	PRJNA523380	SAMN10988338	Human	10138175536	NCI-H2106	BROAD INSTITUTE	public	bam,sra	gs,s3,ncbi	ncbi.public,s3.us-east-1,gs.US	carcinoma (non_small_cell_carcinoma)	metastasis	Caucasian	SRX5414795	Illumina HiSeq 2500	cell line	RNASeq-NCIH2106_LUNG	PAIRED	cDNA	TRANSCRIPTOMIC	Homo sapiens	ILLUMINA	2019-03-27T00:00:00Z	NCIH2106_LUNG	cell culture	male	SRP186687	lung
SRR8615608	NA	RNA-Seq	GCA_000001405.13	202	23257836610	ATCC:NCI-H1838	PRJNA523380	SAMN10988157	Human	12256581918	NCI-H1838	BROAD INSTITUTE	public	bam,sra	s3,gs,ncbi	gs.US,s3.us-east-1,ncbi.public	carcinoma (non_small_cell_carcinoma)	primary	Caucasian	SRX5414792	Illumina HiSeq 2500	cell line	RNASeq-NCIH1838_LUNG	PAIRED	cDNA	TRANSCRIPTOMIC	Homo sapiens	ILLUMINA	2019-03-27T00:00:00Z	NCIH1838_LUNG	cell culture	female	SRP186687	lung
SRR8615611	52	RNA-Seq	GCA_000001405.13	202	22624886174	ATCC:NCI-H1793	PRJNA523380	SAMN10987890	Human	11879920173	NCI-H1793	BROAD INSTITUTE	public	bam,sra	gs,ncbi,s3	gs.US,ncbi.public,s3.us-east-1	carcinoma (non_small_cell_carcinoma)	primary	Caucasian	SRX5414789	Illumina HiSeq 2500	cell line	RNASeq-NCIH1793_LUNG	PAIRED	cDNA	TRANSCRIPTOMIC	Homo sapiens	ILLUMINA	2019-03-27T00:00:00Z	NCIH1793_LUNG	cell culture	female	SRP186687	lung
SRR8615613	61	RNA-Seq	GCA_000001405.13	202	20780847970	ATCC:NCI-H1915	PRJNA523380	SAMN10987732	Human	10988709086	NCI-H1915	BROAD INSTITUTE	public	sra,bam	gs,s3,ncbi	ncbi.public,s3.us-east-1,gs.US	carcinoma (large_cell_carcinoma)	metastasis	Caucasian	SRX5414787	Illumina HiSeq 2500	cell line	RNASeq-NCIH1915_LUNG	PAIRED	cDNA	TRANSCRIPTOMIC	Homo sapiens	ILLUMINA	2019-03-27T00:00:00Z	NCIH1915_LUNG	cell culture	female	SRP186687	lung
SRR8615617	45	RNA-Seq	GCA_000001405.13	202	23284495560	ATCC:COLO 829	PRJNA523380	SAMN10988208	Human	12977917873	COLO 829	BROAD INSTITUTE	public	bam,sra	ncbi,s3,gs	ncbi.public,s3.us-east-1,gs.US	malignant_melanoma	primary	Caucasian	SRX5414783	Illumina HiSeq 2500	cell line	RNASeq-COLO829_SKIN	PAIRED	cDNA	TRANSCRIPTOMIC	Homo sapiens	ILLUMINA	2019-03-27T00:00:00Z	COLO829_SKIN	cell culture	male	SRP186687	skin
SRR8615622	NA	RNA-Seq	GCA_000001405.13	202	16649139162	HSSRB	PRJNA523380	SAMN10987959	Human	8177579696	HEC-251	BROAD INSTITUTE	public	sra,bam	s3,ncbi,gs	s3.us-east-1,gs.US,ncbi.public	carcinoma (adenocarcinoma)	primary	Asian	SRX5414778	Illumina HiSeq 2500	cell line	RNASeq-HEC251_ENDOMETRIUM	PAIRED	cDNA	TRANSCRIPTOMIC	Homo sapiens	ILLUMINA	2019-03-27T00:00:00Z	HEC251_ENDOMETRIUM	cell culture	female	SRP186687	endometrium
SRR8615623	NA	RNA-Seq	GCA_000001405.13	202	18693644590	HSSRB	PRJNA523380	SAMN10987845	Human	9167194467	HEC-265	BROAD INSTITUTE	public	sra,bam	ncbi,s3,gs	ncbi.public,s3.us-east-1,gs.US	carcinoma (adenocarcinoma)	primary	Asian	SRX5414777	Illumina HiSeq 2500	cell line	RNASeq-HEC265_ENDOMETRIUM	PAIRED	cDNA	TRANSCRIPTOMIC	Homo sapiens	ILLUMINA	2019-03-27T00:00:00Z	HEC265_ENDOMETRIUM	cell culture	female	SRP186687	endometrium
SRR8615624	63	RNA-Seq	GCA_000001405.13	202	25794951762	Riken	PRJNA523380	SAMN10987760	Human	14330934780	ECC12	BROAD INSTITUTE	public	bam,sra	s3,ncbi,gs	ncbi.public,s3.us-east-1,gs.US	carcinoma (small_cell_adenocarcinoma)	metastasis	Asian	SRX5414776	Illumina HiSeq 2500	cell line	RNASeq-ECC12_STOMACH	PAIRED	cDNA	TRANSCRIPTOMIC	Homo sapiens	ILLUMINA	2019-03-27T00:00:00Z	ECC12_STOMACH	cell culture	male	SRP186687	stomach
SRR8615626	NA	RNA-Seq	GCA_000001405.13	202	17409579474	HSSRB	PRJNA523380	SAMN10987852	Human	8627551335	HEC-6	BROAD INSTITUTE	public	sra,bam	ncbi,s3,gs	s3.us-east-1,ncbi.public,gs.US	carcinoma (adenocarcinoma)	primary	Asian	SRX5414774	Illumina HiSeq 2500	cell line	RNASeq-HEC6_ENDOMETRIUM	PAIRED	cDNA	TRANSCRIPTOMIC	Homo sapiens	ILLUMINA	2019-03-27T00:00:00Z	HEC6_ENDOMETRIUM	cell culture	female	SRP186687	endometrium
SRR8615637	43	RNA-Seq	GCA_000001405.13	202	20013802258	GNF	PRJNA523380	SAMN10988063	Human	10697669847	A2058	BROAD INSTITUTE	public	sra,bam	gs,s3,ncbi	ncbi.public,s3.us-east-1,gs.US	malignant_melanoma	metastasis	Caucasian	SRX5414763	Illumina HiSeq 2500	cell line	RNASeq-A2058_SKIN	PAIRED	cDNA	TRANSCRIPTOMIC	Homo sapiens	ILLUMINA	2019-03-27T00:00:00Z	A2058_SKIN	cell culture	male	SRP186687	skin
SRR8615638	1	RNA-Seq	GCA_000001405.13	202	14372207080	NIBRI	PRJNA523380	SAMN10987802	Human	7669655686	A-204	BROAD INSTITUTE	public	sra,bam	s3,gs,ncbi	ncbi.public,s3.us-east-1,gs.US	rhabdoid_tumour	primary	Caucasian	SRX5414762	Illumina HiSeq 2500	cell line	RNASeq-A204_SOFT_TISSUE	PAIRED	cDNA	TRANSCRIPTOMIC	Homo sapiens	ILLUMINA	2019-03-27T00:00:00Z	A204_SOFT_TISSUE	cell culture	female	SRP186687	soft_tissue
SRR8615643	63	RNA-Seq	GCA_000001405.13	202	16528716862	ATCC:769-P	PRJNA523380	SAMN10988198	Human	8272823684	769-P	BROAD INSTITUTE	public	sra,bam	gs,s3,ncbi	s3.us-east-1,ncbi.public,gs.US	carcinoma (clear_cell_renal_cell_carcinoma)	primary	Caucasian	SRX5414757	Illumina HiSeq 2500	cell line	RNASeq-769P_KIDNEY	PAIRED	cDNA	TRANSCRIPTOMIC	Homo sapiens	ILLUMINA	2019-03-27T00:00:00Z	769P_KIDNEY	cell culture	female	SRP186687	kidney
SRR8615653	52	RNA-Seq	GCA_000001405.13	202	17946667982	KCLB:SNU-503	PRJNA523380	SAMN10988087	Human	9674877203	SNU-503	BROAD INSTITUTE	public	sra,bam	s3,ncbi,gs	ncbi.public,gs.US,s3.us-east-1	carcinoma	primary	Asian	SRX5414747	Illumina HiSeq 2500	cell line	RNASeq-SNU503_LARGE_INTESTINE	PAIRED	cDNA	TRANSCRIPTOMIC	Homo sapiens	ILLUMINA	2019-03-27T00:00:00Z	SNU503_LARGE_INTESTINE	cell culture	male	SRP186687	large_intestine
SRR8615677	43	RNA-Seq	GCA_000001405.13	202	20512487738	NIBRI	PRJNA523380	SAMN10987910	Human	11046885181	SK-BR-3	BROAD INSTITUTE	public	bam,sra	gs,s3,ncbi	s3.us-east-1,gs.US,ncbi.public	carcinoma	metastasis	Caucasian	SRX5414723	Illumina HiSeq 2500	cell line	RNASeq-SKBR3_BREAST	PAIRED	cDNA	TRANSCRIPTOMIC	Homo sapiens	ILLUMINA	2019-03-27T00:00:00Z	SKBR3_BREAST	cell culture	female	SRP186687	breast
SRR8615679	18	RNA-Seq	GCA_000001405.13	202	21552245368	NIBRI	PRJNA523380	SAMN10987953	Human	11566701719	SK-ES-1	BROAD INSTITUTE	public	bam,sra	gs,ncbi,s3	gs.US,s3.us-east-1,ncbi.public	Ewings_sarcoma-peripheral_primitive_neuroectodermal_tumour	primary	Caucasian	SRX5414721	Illumina HiSeq 2500	cell line	RNASeq-SKES1_BONE	PAIRED	cDNA	TRANSCRIPTOMIC	Homo sapiens	ILLUMINA	2019-03-27T00:00:00Z	SKES1_BONE	cell culture	male	SRP186687	bone
SRR8615680	65	RNA-Seq	GCA_000001405.13	202	16321026724	ATCC:SK-CO-1	PRJNA523380	SAMN10988030	Human	8180488765	SK-CO-1	BROAD INSTITUTE	public	sra,bam	gs,ncbi,s3	ncbi.public,gs.US,s3.us-east-1	carcinoma (adenocarcinoma)	primary	Caucasian	SRX5414720	Illumina HiSeq 2500	cell line	RNASeq-SKCO1_LARGE_INTESTINE	PAIRED	cDNA	TRANSCRIPTOMIC	Homo sapiens	ILLUMINA	2019-03-27T00:00:00Z	SKCO1_LARGE_INTESTINE	cell culture	male	SRP186687	large_intestine
SRR8615683	20	RNA-Seq	GCA_000001405.13	202	12330773668	DSMZ:L-540	PRJNA523380	SAMN10988507	Human	5847748931	L-540	BROAD INSTITUTE	public	bam,sra	gs,s3,ncbi	ncbi.public,s3.us-east-1,gs.US	lymphoid_neoplasm (Hodgkin_lymphoma)	metastasis	Caucasian	SRX5414717	Illumina HiSeq 2500	cell line	RNASeq-L540_HAEMATOPOIETIC_AND_LYMPHOID_TISSUE	PAIRED	cDNA	TRANSCRIPTOMIC	Homo sapiens	ILLUMINA	2019-03-27T00:00:00Z	L540_HAEMATOPOIETIC_AND_LYMPHOID_TISSUE	cell culture	female	SRP186687	haematopoietic_and_lymphoid_tissue
SRR8615685	56	RNA-Seq	GCA_000001405.13	202	22443572388	NIBRI	PRJNA523380	SAMN10987682	Human	11856835365	PANC-1	BROAD INSTITUTE	public	bam,sra	ncbi,gs,s3	ncbi.public,s3.us-east-1,gs.US	carcinoma (ductal_carcinoma)	primary	Caucasian	SRX5414715	Illumina HiSeq 2500	cell line	RNASeq-PANC1_PANCREAS	PAIRED	cDNA	TRANSCRIPTOMIC	Homo sapiens	ILLUMINA	2019-03-27T00:00:00Z	PANC1_PANCREAS	cell culture	male	SRP186687	pancreas
SRR8615689	NA	RNA-Seq	GCA_000001405.13	202	15971054452	NA	PRJNA523380	SAMN10988405	Human	8520638128	U-178	BROAD INSTITUTE	public	sra,bam	s3,gs,ncbi	gs.US,s3.us-east-1,ncbi.public	glioma (astrocytoma_Grade_IV\, glioblastoma_multiforme)	NA	Caucasian	SRX5414711	Illumina HiSeq 2500	cell line	RNASeq-U178_CENTRAL_NERVOUS_SYSTEM	PAIRED	cDNA	TRANSCRIPTOMIC	Homo sapiens	ILLUMINA	2019-03-27T00:00:00Z	U178_CENTRAL_NERVOUS_SYSTEM	cell culture	male	SRP186687	central_nervous_system
SRR8615693	NA	RNA-Seq	GCA_000001405.13	202	16226883816	NA	PRJNA523380	SAMN10988401	Human	8695057390	U343	BROAD INSTITUTE	public	bam,sra	s3,gs,ncbi	ncbi.public,s3.us-east-1,gs.US	glioma (astrocytoma_Grade_III)	NA	Caucasian	SRX5414707	Illumina HiSeq 2500	cell line	RNASeq-U343_CENTRAL_NERVOUS_SYSTEM	PAIRED	cDNA	TRANSCRIPTOMIC	Homo sapiens	ILLUMINA	2019-03-27T00:00:00Z	U343_CENTRAL_NERVOUS_SYSTEM	cell culture	NA	SRP186687	central_nervous_system
SRR8615702	55	RNA-Seq	GCA_000001405.13	202	15970205244	HSSRB	PRJNA523380	SAMN10987822	Human	8520433271	KNS-60	BROAD INSTITUTE	public	sra,bam	s3,gs,ncbi	gs.US,ncbi.public,s3.us-east-1	glioma (astrocytoma_Grade_IV\, glioblastoma_multiforme)	primary	Asian	SRX5414698	Illumina HiSeq 2500	cell line	RNASeq-KNS60_CENTRAL_NERVOUS_SYSTEM	PAIRED	cDNA	TRANSCRIPTOMIC	Homo sapiens	ILLUMINA	2019-03-27T00:00:00Z	KNS60_CENTRAL_NERVOUS_SYSTEM	cell culture	male	SRP186687	central_nervous_system
SRR8615705	77	RNA-Seq	GCA_000001405.13	202	16702797028	DSMZ:KARPAS-620	PRJNA523380	SAMN10989552	Human	8334552477	KARPAS-620	BROAD INSTITUTE	public	bam,sra	ncbi,gs,s3	ncbi.public,gs.US,s3.us-east-1	lymphoid_neoplasm (plasma_cell_myeloma)	primary	Caucasian	SRX5414695	Illumina HiSeq 2500	cell line	RNASeq-KARPAS620_HAEMATOPOIETIC_AND_LYMPHOID_TISSUE	PAIRED	cDNA	TRANSCRIPTOMIC	Homo sapiens	ILLUMINA	2019-03-27T00:00:00Z	KARPAS620_HAEMATOPOIETIC_AND_LYMPHOID_TISSUE	cell culture	female	SRP186687	haematopoietic_and_lymphoid_tissue
SRR8615706	0.25	RNA-Seq	GCA_000001405.13	202	13825453074	DSMZ:KOPN-8	PRJNA523380	SAMN10988515	Human	6532935022	KOPN-8	BROAD INSTITUTE	public	sra,bam	ncbi,s3,gs	ncbi.public,s3.us-east-1,gs.US	lymphoid_neoplasm (acute_lymphoblastic_B_cell_leukaemia)	primary	Asian	SRX5414694	Illumina HiSeq 2500	cell line	RNASeq-KOPN8_HAEMATOPOIETIC_AND_LYMPHOID_TISSUE	PAIRED	cDNA	TRANSCRIPTOMIC	Homo sapiens	ILLUMINA	2019-03-27T00:00:00Z	KOPN8_HAEMATOPOIETIC_AND_LYMPHOID_TISSUE	cell culture	female	SRP186687	haematopoietic_and_lymphoid_tissue
SRR8615716	NA	RNA-Seq	GCA_000001405.13	202	13393322756	Acd Lab	PRJNA523380	SAMN10988224	Human	6292537862	K029AX	BROAD INSTITUTE	public	sra,bam	gs,ncbi,s3	s3.us-east-1,ncbi.public,gs.US	malignant_melanoma	primary	Caucasian	SRX5414684	Illumina HiSeq 2500	cell line	RNASeq-K029AX_SKIN	PAIRED	cDNA	TRANSCRIPTOMIC	Homo sapiens	ILLUMINA	2019-03-27T00:00:00Z	K029AX_SKIN	cell culture	NA	SRP186687	skin
SRR8615717	53	RNA-Seq	GCA_000001405.13	202	17449225610	ATCC:K-562	PRJNA523380	SAMN10988357	Human	8611235057	K-562	BROAD INSTITUTE	public	sra,bam	s3,gs,ncbi	s3.us-east-1,gs.US,ncbi.public	haematopoietic_neoplasm (blast_phase_chronic_myeloid_leukaemia\, Ph_positive)	metastasis	Caucasian	SRX5414683	Illumina HiSeq 2500	cell line	RNASeq-K562_HAEMATOPOIETIC_AND_LYMPHOID_TISSUE	PAIRED	cDNA	TRANSCRIPTOMIC	Homo sapiens	ILLUMINA	2019-03-27T00:00:00Z	K562_HAEMATOPOIETIC_AND_LYMPHOID_TISSUE	cell culture	female	SRP186687	haematopoietic_and_lymphoid_tissue
SRR8615720	NA	RNA-Seq	GCA_000001405.13	202	16796295960	RIKEN:TUHR14TKB	PRJNA523380	SAMN10987725	Human	8223043325	TUHR14TKB	BROAD INSTITUTE	public	sra,bam	s3,ncbi,gs	gs.US,ncbi.public,s3.us-east-1	carcinoma	primary	Asian	SRX5414680	Illumina HiSeq 2500	cell line	RNASeq-TUHR14TKB_KIDNEY	PAIRED	cDNA	TRANSCRIPTOMIC	Homo sapiens	ILLUMINA	2019-03-27T00:00:00Z	TUHR14TKB_KIDNEY	cell culture	NA	SRP186687	kidney
SRR8615722	17	RNA-Seq	GCA_000001405.13	202	21686220858	DSMZ:RH-30	PRJNA523380	SAMN10988045	Human	11638539659	RH-30	BROAD INSTITUTE	public	bam,sra	gs,ncbi,s3	ncbi.public,gs.US,s3.us-east-1	rhabdomyosarcoma (alveolar)	metastasis	Caucasian	SRX5414678	Illumina HiSeq 2500	cell line	RNASeq-RH30_SOFT_TISSUE	PAIRED	cDNA	TRANSCRIPTOMIC	Homo sapiens	ILLUMINA	2019-03-27T00:00:00Z	RH30_SOFT_TISSUE	cell culture	male	SRP186687	soft_tissue
SRR8615724	NA	RNA-Seq	GCA_000001405.13	202	17103986804	NA	PRJNA523380	SAMN10989625	Human	9114723408	TTC709	BROAD INSTITUTE	public	sra,bam	gs,s3,ncbi	gs.US,ncbi.public,s3.us-east-1	NA	NA	NA	SRX5414676	Illumina HiSeq 2500	cell line	RNASeq-TTC709_SOFT_TISSUE	PAIRED	cDNA	TRANSCRIPTOMIC	Homo sapiens	ILLUMINA	2019-03-27T00:00:00Z	TTC709_SOFT_TISSUE	cell culture	NA	SRP186687	soft_tissue
SRR8615727	NA	RNA-Seq	GCA_000001405.13	202	16105512318	HSSRB	PRJNA523380	SAMN10988191	Human	8097377537	NA	BROAD INSTITUTE	public	sra,bam	ncbi,gs,s3	s3.us-east-1,ncbi.public,gs.US	NA	NA	NA	SRX5414673	Illumina HiSeq 2500	cell line	RNASeq-TT_OESOPHAGUS	PAIRED	cDNA	TRANSCRIPTOMIC	Homo sapiens	ILLUMINA	2019-03-27T00:00:00Z	TT_OESOPHAGUS	cell culture	NA	SRP186687	NA
SRR8615729	62	RNA-Seq	GCA_000001405.13	202	15601367384	NA	PRJNA523380	SAMN10988233	Human	7862586021	TOV-21G	BROAD INSTITUTE	public	sra,bam	ncbi,s3,gs	gs.US,s3.us-east-1,ncbi.public	carcinoma (clear_cell_carcinoma)	primary	Caucasian	SRX5414671	Illumina HiSeq 2500	cell line	RNASeq-TOV21G_OVARY	PAIRED	cDNA	TRANSCRIPTOMIC	Homo sapiens	ILLUMINA	2019-03-27T00:00:00Z	TOV21G_OVARY	cell culture	female	SRP186687	ovary
SRR8615731	NA	RNA-Seq	GCA_000001405.13	202	12864390604	NA	PRJNA523380	SAMN10989626	Human	5875817821	TTC1240	BROAD INSTITUTE	public	sra,bam	ncbi,gs,s3	ncbi.public,s3.us-east-1,gs.US	NA	NA	NA	SRX5414669	Illumina HiSeq 2500	cell line	RNASeq-TTC1240_SOFT_TISSUE	PAIRED	cDNA	TRANSCRIPTOMIC	Homo sapiens	ILLUMINA	2019-03-27T00:00:00Z	TTC1240_SOFT_TISSUE	cell culture	NA	SRP186687	soft_tissue
SRR8615732	35	RNA-Seq	GCA_000001405.13	202	14605672620	HSSRB	PRJNA523380	SAMN10988051	Human	7824010122	GB-1	BROAD INSTITUTE	public	bam,sra	gs,ncbi,s3	gs.US,s3.us-east-1,ncbi.public	glioma (astrocytoma_Grade_IV\, glioblastoma_multiforme)	primary	Asian	SRX5414668	Illumina HiSeq 2500	cell line	RNASeq-GB1_CENTRAL_NERVOUS_SYSTEM	PAIRED	cDNA	TRANSCRIPTOMIC	Homo sapiens	ILLUMINA	2019-03-27T00:00:00Z	GB1_CENTRAL_NERVOUS_SYSTEM	cell culture	male	SRP186687	central_nervous_system
SRR8615736	65	RNA-Seq	GCA_000001405.13	202	15333134614	NIBRI	PRJNA523380	SAMN10988241	Human	8145500259	FU-OV-1	BROAD INSTITUTE	public	sra,bam	ncbi,s3,gs	gs.US,ncbi.public,s3.us-east-1	carcinoma (serous_carcinoma)	primary	Asian	SRX5414664	Illumina HiSeq 2500	cell line	RNASeq-FUOV1_OVARY	PAIRED	cDNA	TRANSCRIPTOMIC	Homo sapiens	ILLUMINA	2019-03-27T00:00:00Z	FUOV1_OVARY	cell culture	female	SRP186687	ovary
SRR8615742	42	RNA-Seq	GCA_000001405.13	202	19705757510	DSMZ:GAMG	PRJNA523380	SAMN10988278	Human	10420383373	GAMG	BROAD INSTITUTE	public	sra,bam	gs,s3,ncbi	ncbi.public,gs.US,s3.us-east-1	glioma	primary	Caucasian	SRX5414658	Illumina HiSeq 2500	cell line	RNASeq-GAMG_CENTRAL_NERVOUS_SYSTEM	PAIRED	cDNA	TRANSCRIPTOMIC	Homo sapiens	ILLUMINA	2019-03-27T00:00:00Z	GAMG_CENTRAL_NERVOUS_SYSTEM	cell culture	female	SRP186687	central_nervous_system
SRR8615744	NA	RNA-Seq	GCA_000001405.13	202	15297831882	RIKEN:SH-10-TC	PRJNA523380	SAMN10987814	Human	7881180964	SH-10-TC	BROAD INSTITUTE	public	bam,sra	ncbi,s3,gs	s3.us-east-1,ncbi.public,gs.US	carcinoma	primary	Asian	SRX5414656	Illumina HiSeq 2500	cell line	RNASeq-SH10TC_STOMACH	PAIRED	cDNA	TRANSCRIPTOMIC	Homo sapiens	ILLUMINA	2019-03-27T00:00:00Z	SH10TC_STOMACH	cell culture	NA	SRP186687	stomach
SRR8615753	40	RNA-Seq	GCA_000001405.13	202	15633627188	NIBRI	PRJNA523380	SAMN10988314	Human	7209048709	OVKATE	BROAD INSTITUTE	public	bam,sra	gs,s3,ncbi	gs.US,s3.us-east-1,ncbi.public	carcinoma (adenocarcinoma)	primary	Asian	SRX5414647	Illumina HiSeq 2500	cell line	RNASeq-OVKATE_OVARY	PAIRED	cDNA	TRANSCRIPTOMIC	Homo sapiens	ILLUMINA	2019-03-27T00:00:00Z	OVKATE_OVARY	cell culture	female	SRP186687	ovary
SRR8615754	37	RNA-Seq	GCA_000001405.13	202	17033467998	NIBRI	PRJNA523380	SAMN10988180	Human	8519487535	U-937	BROAD INSTITUTE	public	bam,sra	ncbi,gs,s3	ncbi.public,s3.us-east-1,gs.US	lymphoid_neoplasm (diffuse_large_B_cell_lymphoma)	metastasis	Caucasian	SRX5414646	Illumina HiSeq 2500	cell line	RNASeq-U937_HAEMATOPOIETIC_AND_LYMPHOID_TISSUE	PAIRED	cDNA	TRANSCRIPTOMIC	Homo sapiens	ILLUMINA	2019-03-27T00:00:00Z	U937_HAEMATOPOIETIC_AND_LYMPHOID_TISSUE	cell culture	male	SRP186687	haematopoietic_and_lymphoid_tissue
SRR8615755	47	RNA-Seq	GCA_000001405.13	202	14010720202	NA	PRJNA523380	SAMN10988465	Human	6626177459	MDA-MB-134-VI	BROAD INSTITUTE	public	sra,bam	s3,ncbi,gs	s3.us-east-1,gs.US,ncbi.public	carcinoma (ductal_carcinoma)	metastasis	Caucasian	SRX5414645	Illumina HiSeq 2500	cell line	RNASeq-MDAMB134VI_BREAST	PAIRED	cDNA	TRANSCRIPTOMIC	Homo sapiens	ILLUMINA	2019-03-27T00:00:00Z	MDAMB134VI_BREAST	cell culture	female	SRP186687	breast
SRR8615759	43	RNA-Seq	GCA_000001405.13	202	15750040596	NIBRI	PRJNA523380	SAMN10988242	Human	7409167661	Malme-3M	BROAD INSTITUTE	public	bam,sra	s3,ncbi,gs	gs.US,ncbi.public,s3.us-east-1	malignant_melanoma	metastasis	Caucasian	SRX5414641	Illumina HiSeq 2500	cell line	RNASeq-MALME3M_SKIN	PAIRED	cDNA	TRANSCRIPTOMIC	Homo sapiens	ILLUMINA	2019-03-27T00:00:00Z	MALME3M_SKIN	cell culture	male	SRP186687	skin
SRR8615761	33	RNA-Seq	GCA_000001405.13	202	14446811134	ATCC:M059K	PRJNA523380	SAMN10987790	Human	6785112345	M059K	BROAD INSTITUTE	public	bam,sra	ncbi,s3,gs	ncbi.public,gs.US,s3.us-east-1	glioma (astrocytoma_Grade_IV\, glioblastoma_multiforme)	primary	Caucasian	SRX5414639	Illumina HiSeq 2500	cell line	RNASeq-M059K_CENTRAL_NERVOUS_SYSTEM	PAIRED	cDNA	TRANSCRIPTOMIC	Homo sapiens	ILLUMINA	2019-03-27T00:00:00Z	M059K_CENTRAL_NERVOUS_SYSTEM	cell culture	male	SRP186687	central_nervous_system
SRR8615774	43	RNA-Seq	GCA_000001405.13	202	19345831890	ATCC:AU565	PRJNA523380	SAMN10987882	Human	9677405895	AU565	BROAD INSTITUTE	public	bam,sra	ncbi,gs,s3	ncbi.public,s3.us-east-1,gs.US	carcinoma	metastasis	Caucasian	SRX5414626	Illumina HiSeq 2500	cell line	RNASeq-AU565_BREAST	PAIRED	cDNA	TRANSCRIPTOMIC	Homo sapiens	ILLUMINA	2019-03-27T00:00:00Z	AU565_BREAST	cell culture	female	SRP186687	breast
SRR8615776	63	RNA-Seq	GCA_000001405.13	202	25282341210	DSMZ:BHT-101	PRJNA523380	SAMN10988574	Human	14212346483	BHT-101	BROAD INSTITUTE	public	bam,sra	gs,s3,ncbi	gs.US,s3.us-east-1,ncbi.public	carcinoma (anaplastic_carcinoma)	metastasis	Caucasian	SRX5414624	Illumina HiSeq 2500	cell line	RNASeq-BHT101_THYROID	PAIRED	cDNA	TRANSCRIPTOMIC	Homo sapiens	ILLUMINA	2019-03-27T00:00:00Z	BHT101_THYROID	cell culture	female	SRP186687	thyroid
SRR8615777	52	RNA-Seq	GCA_000001405.13	202	19583498222	DSMZ:BHY	PRJNA523380	SAMN10987691	Human	11159181238	BHY	BROAD INSTITUTE	public	bam,sra	gs,s3,ncbi	gs.US,ncbi.public,s3.us-east-1	carcinoma (squamous_cell_carcinoma)	primary	Asian	SRX5414623	Illumina HiSeq 2500	cell line	RNASeq-BHY_UPPER_AERODIGESTIVE_TRACT	PAIRED	cDNA	TRANSCRIPTOMIC	Homo sapiens	ILLUMINA	2019-03-27T00:00:00Z	BHY_UPPER_AERODIGESTIVE_TRACT	cell culture	male	SRP186687	upper_aerodigestive_tract
SRR8615779	70	RNA-Seq	GCA_000001405.13	202	15214526476	ATCC:Hs 698.T	PRJNA523380	SAMN10988478	Human	7434918590	Hs 698.T	BROAD INSTITUTE	public	sra,bam	ncbi,s3,gs	gs.US,s3.us-east-1,ncbi.public	carcinoma (adenocarcinoma)	metastasis	Caucasian	SRX5414621	Illumina HiSeq 2500	cell line	RNASeq-HS698T_FIBROBLAST	PAIRED	cDNA	TRANSCRIPTOMIC	Homo sapiens	ILLUMINA	2019-03-27T00:00:00Z	HS698T_FIBROBLAST	cell culture	male	SRP186687	large_intestine
SRR8615780	16	RNA-Seq	GCA_000001405.13	202	19094826286	GNF	PRJNA523380	SAMN10987681	Human	9410530314	Hs 706.T	BROAD INSTITUTE	public	sra,bam	ncbi,gs,s3	ncbi.public,gs.US,s3.us-east-1	giant_cell_tumour	primary	Caucasian	SRX5414620	Illumina HiSeq 2500	cell line	RNASeq-HS706T_BONE	PAIRED	cDNA	TRANSCRIPTOMIC	Homo sapiens	ILLUMINA	2019-03-27T00:00:00Z	HS706T_BONE	cell culture	female	SRP186687	bone
SRR8615785	69	RNA-Seq	GCA_000001405.13	202	16931206508	NA	PRJNA523380	SAMN10988159	Human	8304812665	Hs 688(A).T	BROAD INSTITUTE	public	sra,bam	s3,ncbi,gs	ncbi.public,gs.US,s3.us-east-1	malignant_melanoma	primary	Caucasian	SRX5414615	Illumina HiSeq 2500	cell line	RNASeq-HS688AT_FIBROBLAST	PAIRED	cDNA	TRANSCRIPTOMIC	Homo sapiens	ILLUMINA	2019-03-27T00:00:00Z	HS688AT_FIBROBLAST	cell culture	male	SRP186687	skin
SRR8615788	69	RNA-Seq	GCA_000001405.13	202	17375583682	GNF	PRJNA523380	SAMN10988282	Human	8680918508	COLO 741	BROAD INSTITUTE	public	sra,bam	ncbi,gs,s3	ncbi.public,s3.us-east-1,gs.US	malignant_melanoma	metastasis	Caucasian	SRX5414612	Illumina HiSeq 2500	cell line	RNASeq-COLO741_SKIN	PAIRED	cDNA	TRANSCRIPTOMIC	Homo sapiens	ILLUMINA	2019-03-27T00:00:00Z	COLO741_SKIN	cell culture	female	SRP186687	skin
SRR8615794	NA	RNA-Seq	GCA_000001405.13	202	16162308860	NA	PRJNA523380	SAMN10989610	Human	8588228623	NCI-H2077;NCI-H1581	BROAD INSTITUTE	public	bam,sra	s3,ncbi,gs	ncbi.public,gs.US,s3.us-east-1	NA	NA	NA	SRX5414606	Illumina HiSeq 2500	cell line	RNASeq-NCIH2077_LUNG	PAIRED	cDNA	TRANSCRIPTOMIC	Homo sapiens	ILLUMINA	2019-03-27T00:00:00Z	NCIH2077_LUNG	cell culture	NA	SRP186687	lung
SRR8615797	74	RNA-Seq	GCA_000001405.13	202	20869139544	HSRRB	PRJNA523380	SAMN10988238	Human	11207116304	RERF-LC-Sq1	BROAD INSTITUTE	public	bam,sra	ncbi,s3,gs	s3.us-east-1,gs.US,ncbi.public	carcinoma (squamous_cell_carcinoma)	primary	Asian	SRX5414603	Illumina HiSeq 2500	cell line	RNASeq-RERFLCSQ1_LUNG	PAIRED	cDNA	TRANSCRIPTOMIC	Homo sapiens	ILLUMINA	2019-03-27T00:00:00Z	RERFLCSQ1_LUNG	cell culture	female	SRP186687	lung
SRR8615798	60	RNA-Seq	GCA_000001405.13	202	17948269236	GNF	PRJNA523380	SAMN10988279	Human	8881419202	NCI-H522	BROAD INSTITUTE	public	bam,sra	gs,s3,ncbi	s3.us-east-1,ncbi.public,gs.US	carcinoma (non_small_cell_carcinoma)	primary	Caucasian	SRX5414602	Illumina HiSeq 2500	cell line	RNASeq-NCIH522_LUNG	PAIRED	cDNA	TRANSCRIPTOMIC	Homo sapiens	ILLUMINA	2019-03-27T00:00:00Z	NCIH522_LUNG	cell culture	male	SRP186687	lung
SRR8615805	NA	RNA-Seq	GCA_000001405.13	202	22055642296	ATCC:NCI-H358	PRJNA523380	SAMN10987886	Human	11609043486	NCI-H358	BROAD INSTITUTE	public	bam,sra	ncbi,gs,s3	s3.us-east-1,ncbi.public,gs.US	carcinoma (bronchioloalveolar_adenocarcinoma)	primary	Caucasian	SRX5414595	Illumina HiSeq 2500	cell line	RNASeq-NCIH358_LUNG	PAIRED	cDNA	TRANSCRIPTOMIC	Homo sapiens	ILLUMINA	2019-03-27T00:00:00Z	NCIH358_LUNG	cell culture	male	SRP186687	lung
SRR8615811	61	RNA-Seq	GCA_000001405.13	202	19129933482	ATCC:NCI-H446	PRJNA523380	SAMN10988349	Human	9558894894	NCI-H446	BROAD INSTITUTE	public	bam,sra	gs,s3,ncbi	ncbi.public,s3.us-east-1,gs.US	carcinoma (small_cell_carcinoma)	metastasis	Caucasian	SRX5414589	Illumina HiSeq 2500	cell line	RNASeq-NCIH446_LUNG	PAIRED	cDNA	TRANSCRIPTOMIC	Homo sapiens	ILLUMINA	2019-03-27T00:00:00Z	NCIH446_LUNG	cell culture	male	SRP186687	lung
SRR8615824	47	RNA-Seq	GCA_000001405.13	202	24697111860	KCLB:HCC-1195	PRJNA523380	SAMN10988074	Human	13853187286	HCC-1195	BROAD INSTITUTE	public	sra,bam	gs,ncbi,s3	s3.us-east-1,gs.US,ncbi.public	carcinoma (mixed_adenosquamous_carcinoma)	primary	African_american	SRX5414576	Illumina HiSeq 2500	cell line	RNASeq-HCC1195_LUNG	PAIRED	cDNA	TRANSCRIPTOMIC	Homo sapiens	ILLUMINA	2019-03-27T00:00:00Z	HCC1195_LUNG	cell culture	male	SRP186687	lung
SRR8615830	61	RNA-Seq	GCA_000001405.13	202	15976724794	ATCC:T98G	PRJNA523380	SAMN10988244	Human	8034375316	T98G	BROAD INSTITUTE	public	bam,sra	ncbi,s3,gs	ncbi.public,s3.us-east-1,gs.US	glioma (astrocytoma_Grade_IV\, glioblastoma_multiforme)	primary	Caucasian	SRX5414570	Illumina HiSeq 2500	cell line	RNASeq-T98G_CENTRAL_NERVOUS_SYSTEM	PAIRED	cDNA	TRANSCRIPTOMIC	Homo sapiens	ILLUMINA	2019-03-27T00:00:00Z	T98G_CENTRAL_NERVOUS_SYSTEM	cell culture	male	SRP186687	central_nervous_system
SRR8615831	28	RNA-Seq	GCA_000001405.13	202	14339254416	NIBRI	PRJNA523380	SAMN10987755	Human	6940259377	TALL-1	BROAD INSTITUTE	public	bam,sra	s3,gs,ncbi	gs.US,ncbi.public,s3.us-east-1	lymphoid_neoplasm (acute_lymphoblastic_T_cell_leukaemia)	primary	NA	SRX5414569	Illumina HiSeq 2500	cell line	RNASeq-TALL1_HAEMATOPOIETIC_AND_LYMPHOID_TISSUE	PAIRED	cDNA	TRANSCRIPTOMIC	Homo sapiens	ILLUMINA	2019-03-27T00:00:00Z	TALL1_HAEMATOPOIETIC_AND_LYMPHOID_TISSUE	cell culture	male	SRP186687	haematopoietic_and_lymphoid_tissue
SRR8615837	NA	RNA-Seq	GCA_000001405.13	202	17200911252	NA	PRJNA523380	SAMN10988402	Human	9235771099	LN-215	BROAD INSTITUTE	public	sra,bam	s3,ncbi,gs	gs.US,s3.us-east-1,ncbi.public	glioma (astrocytoma_Grade_IV)	NA	Caucasian	SRX5414563	Illumina HiSeq 2500	cell line	RNASeq-LN215_CENTRAL_NERVOUS_SYSTEM	PAIRED	cDNA	TRANSCRIPTOMIC	Homo sapiens	ILLUMINA	2019-03-27T00:00:00Z	LN215_CENTRAL_NERVOUS_SYSTEM	cell culture	NA	SRP186687	central_nervous_system
SRR8615850	53	RNA-Seq	GCA_000001405.13	202	16319897948	NIBRI	PRJNA523380	SAMN10987600	Human	8005949868	HuT 78	BROAD INSTITUTE	public	sra,bam	s3,gs,ncbi	s3.us-east-1,ncbi.public,gs.US	lymphoid_neoplasm (mycosis_fungoides-Sezary_syndrome)	primary	Caucasian	SRX5414550	Illumina HiSeq 2500	cell line	RNASeq-HUT78_HAEMATOPOIETIC_AND_LYMPHOID_TISSUE	PAIRED	cDNA	TRANSCRIPTOMIC	Homo sapiens	ILLUMINA	2019-03-27T00:00:00Z	HUT78_HAEMATOPOIETIC_AND_LYMPHOID_TISSUE	cell culture	male	SRP186687	haematopoietic_and_lymphoid_tissue
SRR8615852	NA	RNA-Seq	GCA_000001405.13	202	19868104506	Garraway Lab	PRJNA523380	SAMN10989593	Human	10676760329	SNB75	BROAD INSTITUTE	public	bam,sra	gs,s3,ncbi	gs.US,s3.us-east-1,ncbi.public	glioma	primary	Caucasian	SRX5414548	Illumina HiSeq 2500	cell line	RNASeq-SNB75_CENTRAL_NERVOUS_SYSTEM	PAIRED	cDNA	TRANSCRIPTOMIC	Homo sapiens	ILLUMINA	2019-03-27T00:00:00Z	SNB75_CENTRAL_NERVOUS_SYSTEM	cell culture	NA	SRP186687	central_nervous_system
SRR8615853	53	RNA-Seq	GCA_000001405.13	202	16496135474	NA	PRJNA523380	SAMN10987793	Human	8280809991	SW 900	BROAD INSTITUTE	public	sra,bam	gs,s3,ncbi	ncbi.public,s3.us-east-1,gs.US	carcinoma (squamous_cell_carcinoma)	primary	Caucasian	SRX5414547	Illumina HiSeq 2500	cell line	RNASeq-SW900_LUNG	PAIRED	cDNA	TRANSCRIPTOMIC	Homo sapiens	ILLUMINA	2019-03-27T00:00:00Z	SW900_LUNG	cell culture	male	SRP186687	lung
SRR8615854	53	RNA-Seq	GCA_000001405.13	202	11305187954	ATCC:SW837	PRJNA523380	SAMN10987996	Human	5415882763	SW837	BROAD INSTITUTE	public	sra,bam	s3,gs,ncbi	ncbi.public,gs.US,s3.us-east-1	carcinoma (adenocarcinoma)	primary	Caucasian	SRX5414546	Illumina HiSeq 2500	cell line	RNASeq-SW837_LARGE_INTESTINE	PAIRED	cDNA	TRANSCRIPTOMIC	Homo sapiens	ILLUMINA	2019-03-27T00:00:00Z	SW837_LARGE_INTESTINE	cell culture	male	SRP186687	large_intestine
SRR8615858	81	RNA-Seq	GCA_000001405.13	202	17361721028	ATCC:T24	PRJNA523380	SAMN10987918	Human	8686260713	T24	BROAD INSTITUTE	public	bam,sra	gs,s3,ncbi	ncbi.public,s3.us-east-1,gs.US	carcinoma (transitional_cell_carcinoma)	primary	Caucasian	SRX5414542	Illumina HiSeq 2500	cell line	RNASeq-T24_URINARY_TRACT	PAIRED	cDNA	TRANSCRIPTOMIC	Homo sapiens	ILLUMINA	2019-03-27T00:00:00Z	T24_URINARY_TRACT	cell culture	female	SRP186687	urinary_tract
SRR8615869	42	RNA-Seq	GCA_000001405.13	202	19410740550	ECACC:FTC-133	PRJNA523380	SAMN10987983	Human	10804387665	FTC-133	BROAD INSTITUTE	public	bam,sra	ncbi,gs,s3	gs.US,ncbi.public,s3.us-east-1	carcinoma (follicular_carcinoma)	metastasis	Caucasian	SRX5415180	Illumina HiSeq 2500	cell line	RNASeq-FTC133_THYROID	PAIRED	cDNA	TRANSCRIPTOMIC	Homo sapiens	ILLUMINA	2019-03-27T00:00:00Z	FTC133_THYROID	cell culture	male	SRP186687	thyroid
SRR8615873	78	RNA-Seq	GCA_000001405.13	202	15091312132	ECACC:OV7	PRJNA523380	SAMN10988013	Human	7553881380	OV7	BROAD INSTITUTE	public	bam,sra	ncbi,gs,s3	gs.US,ncbi.public,s3.us-east-1	carcinoma	primary	Caucasian	SRX5415177	Illumina HiSeq 2500	cell line	RNASeq-OV7_OVARY	PAIRED	cDNA	TRANSCRIPTOMIC	Homo sapiens	ILLUMINA	2019-03-27T00:00:00Z	OV7_OVARY	cell culture	female	SRP186687	ovary
SRR8615880	NA	RNA-Seq	GCA_000001405.13	202	23411998364	Riken	PRJNA523380	SAMN10987740	Human	12334487549	OVK18	BROAD INSTITUTE	public	bam,sra	ncbi,s3,gs	ncbi.public,s3.us-east-1,gs.US	carcinoma (endometrioid_carcinoma)	primary	Asian	SRX5415170	Illumina HiSeq 2500	cell line	RNASeq-OVK18_OVARY	PAIRED	cDNA	TRANSCRIPTOMIC	Homo sapiens	ILLUMINA	2019-03-27T00:00:00Z	OVK18_OVARY	cell culture	female	SRP186687	ovary
SRR8615894	NA	RNA-Seq	GCA_000001405.13	202	8673458628	RIKEN:TUHR4TKB	PRJNA523380	SAMN10987695	Human	4094100671	TUHR4TKB	BROAD INSTITUTE	public	bam,sra	gs,s3,ncbi	ncbi.public,gs.US,s3.us-east-1	carcinoma	primary	Asian	SRX5415156	Illumina HiSeq 2500	cell line	RNASeq-TUHR4TKB_KIDNEY	PAIRED	cDNA	TRANSCRIPTOMIC	Homo sapiens	ILLUMINA	2019-03-27T00:00:00Z	TUHR4TKB_KIDNEY	cell culture	NA	SRP186687	kidney
SRR8615899	49	RNA-Seq	GCA_000001405.13	202	16630993704	ATCC:NCI-H1339	PRJNA523380	SAMN10987986	Human	8336180759	NCI-H1339	BROAD INSTITUTE	public	sra,bam	s3,ncbi,gs	s3.us-east-1,ncbi.public,gs.US	carcinoma (small_cell_carcinoma)	metastasis	African_american	SRX5415151	Illumina HiSeq 2500	cell line	RNASeq-NCIH1339_LUNG	PAIRED	cDNA	TRANSCRIPTOMIC	Homo sapiens	ILLUMINA	2019-03-27T00:00:00Z	NCIH1339_LUNG	cell culture	female	SRP186687	lung
SRR8615900	52	RNA-Seq	GCA_000001405.13	202	16559005550	DSMZ:HCC-33	PRJNA523380	SAMN10987702	Human	8198611263	HCC-33	BROAD INSTITUTE	public	sra,bam	ncbi,gs,s3	gs.US,s3.us-east-1,ncbi.public	carcinoma (small_cell_carcinoma)	metastasis	Caucasian	SRX5415150	Illumina HiSeq 2500	cell line	RNASeq-HCC33_LUNG	PAIRED	cDNA	TRANSCRIPTOMIC	Homo sapiens	ILLUMINA	2019-03-27T00:00:00Z	HCC33_LUNG	cell culture	male	SRP186687	lung
SRR8615905	53	RNA-Seq	GCA_000001405.13	202	22435790742	ATCC:NCI-H1355	PRJNA523380	SAMN10987956	Human	11857468690	NCI-H1355	BROAD INSTITUTE	public	bam,sra	gs,s3,ncbi	s3.us-east-1,gs.US,ncbi.public	carcinoma (adenocarcinoma)	metastasis	Caucasian	SRX5415145	Illumina HiSeq 2500	cell line	RNASeq-NCIH1355_LUNG	PAIRED	cDNA	TRANSCRIPTOMIC	Homo sapiens	ILLUMINA	2019-03-27T00:00:00Z	NCIH1355_LUNG	cell culture	male	SRP186687	lung
SRR8615914	53	RNA-Seq	GCA_000001405.13	202	14974838932	NIBRI	PRJNA523380	SAMN10987656	Human	7071573348	JHH-7	BROAD INSTITUTE	public	bam,sra	ncbi,s3,gs	s3.us-east-1,ncbi.public,gs.US	carcinoma (hepatocellular_carcinoma)	primary	Asian	SRX5415136	Illumina HiSeq 2500	cell line	RNASeq-JHH7_LIVER	PAIRED	cDNA	TRANSCRIPTOMIC	Homo sapiens	ILLUMINA	2019-03-27T00:00:00Z	JHH7_LIVER	cell culture	male	SRP186687	liver
SRR8615917	NA	RNA-Seq	GCA_000001405.13	202	14866763478	RIKEN:JHOM-2B	PRJNA523380	SAMN10987763	Human	7017167529	JHOM-2B	BROAD INSTITUTE	public	bam,sra	ncbi,gs,s3	ncbi.public,gs.US,s3.us-east-1	carcinoma (adenocarcinoma)	primary	Asian	SRX5415133	Illumina HiSeq 2500	cell line	RNASeq-JHOM2B_OVARY	PAIRED	cDNA	TRANSCRIPTOMIC	Homo sapiens	ILLUMINA	2019-03-27T00:00:00Z	JHOM2B_OVARY	cell culture	female	SRP186687	ovary
SRR8615926	8	RNA-Seq	GCA_000001405.13	202	17108212644	NIBRI	PRJNA523380	SAMN10987655	Human	8442275664	SUP-T1	BROAD INSTITUTE	public	sra,bam	s3,gs,ncbi	s3.us-east-1,ncbi.public,gs.US	lymphoid_neoplasm (acute_lymphoblastic_T_cell_leukaemia)	metastasis	Caucasian	SRX5415124	Illumina HiSeq 2500	cell line	RNASeq-SUPT1_HAEMATOPOIETIC_AND_LYMPHOID_TISSUE	PAIRED	cDNA	TRANSCRIPTOMIC	Homo sapiens	ILLUMINA	2019-03-27T00:00:00Z	SUPT1_HAEMATOPOIETIC_AND_LYMPHOID_TISSUE	cell culture	male	SRP186687	haematopoietic_and_lymphoid_tissue
SRR8615935	56	RNA-Seq	GCA_000001405.13	202	17110555642	KCLB:SNU-175	PRJNA523380	SAMN10988067	Human	8598498804	SNU-175	BROAD INSTITUTE	public	bam,sra	ncbi,s3,gs	gs.US,ncbi.public,s3.us-east-1	carcinoma	primary	Asian	SRX5415115	Illumina HiSeq 2500	cell line	RNASeq-SNU175_LARGE_INTESTINE	PAIRED	cDNA	TRANSCRIPTOMIC	Homo sapiens	ILLUMINA	2019-03-27T00:00:00Z	SNU175_LARGE_INTESTINE	cell culture	female	SRP186687	large_intestine
SRR8615977	69	RNA-Seq	GCA_000001405.13	202	17718935202	ATCC:NCI-H889	PRJNA523380	SAMN10988219	Human	9416161973	NCI-H889	BROAD INSTITUTE	public	sra,bam	s3,ncbi,gs	ncbi.public,gs.US,s3.us-east-1	carcinoma (small_cell_carcinoma)	metastasis	Caucasian	SRX5415073	Illumina HiSeq 2500	cell line	RNASeq-NCIH889_LUNG	PAIRED	cDNA	TRANSCRIPTOMIC	Homo sapiens	ILLUMINA	2019-03-27T00:00:00Z	NCIH889_LUNG	cell culture	female	SRP186687	lung
SRR8615980	50	RNA-Seq	GCA_000001405.13	202	15925857356	ATCC:NCI-H1792	PRJNA523380	SAMN10987908	Human	8520229888	NCI-H1792	BROAD INSTITUTE	public	bam,sra	ncbi,gs,s3	ncbi.public,gs.US,s3.us-east-1	carcinoma (adenocarcinoma)	metastasis	Caucasian	SRX5415070	Illumina HiSeq 2500	cell line	RNASeq-NCIH1792_LUNG	PAIRED	cDNA	TRANSCRIPTOMIC	Homo sapiens	ILLUMINA	2019-03-27T00:00:00Z	NCIH1792_LUNG	cell culture	male	SRP186687	lung
SRR8616009	62	RNA-Seq	GCA_000001405.13	202	12928315726	DSMZ:DM-3	PRJNA523380	SAMN10988453	Human	6202030264	DM-3	BROAD INSTITUTE	public	bam,sra	gs,ncbi,s3	s3.us-east-1,ncbi.public,gs.US	mesothelioma	metastasis	Caucasian	SRX5415041	Illumina HiSeq 2500	cell line	RNASeq-DM3_FIBROBLAST	PAIRED	cDNA	TRANSCRIPTOMIC	Homo sapiens	ILLUMINA	2019-03-27T00:00:00Z	DM3_FIBROBLAST	cell culture	male	SRP186687	pleura
SRR8616076	50	RNA-Seq	GCA_000001405.13	202	15626713738	DSMZ:KPL-1	PRJNA523380	SAMN10987693	Human	7378395568	KPL-1	BROAD INSTITUTE	public	sra,bam	ncbi,s3,gs	gs.US,s3.us-east-1,ncbi.public	carcinoma (ductal_carcinoma)	metastasis	Caucasian	SRX5414974	Illumina HiSeq 2500	cell line	RNASeq-KPL1_BREAST	PAIRED	cDNA	TRANSCRIPTOMIC	Homo sapiens	ILLUMINA	2019-03-27T00:00:00Z	KPL1_BREAST	cell culture	female	SRP186687	breast
SRR8616078	NA	RNA-Seq	GCA_000001405.13	202	12134430678	HSSRB	PRJNA523380	SAMN10987720	Human	5741039098	KP-N-RT-BM-1	BROAD INSTITUTE	public	sra,bam	gs,s3,ncbi	ncbi.public,s3.us-east-1,gs.US	neuroblastoma	metastasis	Asian	SRX5414972	Illumina HiSeq 2500	cell line	RNASeq-KPNRTBM1_AUTONOMIC_GANGLIA	PAIRED	cDNA	TRANSCRIPTOMIC	Homo sapiens	ILLUMINA	2019-03-27T00:00:00Z	KPNRTBM1_AUTONOMIC_GANGLIA	cell culture	NA	SRP186687	autonomic_ganglia
SRR8616084	NA	RNA-Seq	GCA_000001405.13	202	23840691450	ATCC:Toledo	PRJNA523380	SAMN10987633	Human	11820580807	Toledo	BROAD INSTITUTE	public	sra,bam	gs,s3,ncbi	s3.us-east-1,ncbi.public,gs.US	lymphoid_neoplasm (diffuse_large_B_cell_lymphoma)	primary	Caucasian	SRX5414966	Illumina HiSeq 2500	cell line	RNASeq-TOLEDO_HAEMATOPOIETIC_AND_LYMPHOID_TISSUE	PAIRED	cDNA	TRANSCRIPTOMIC	Homo sapiens	ILLUMINA	2019-03-27T00:00:00Z	TOLEDO_HAEMATOPOIETIC_AND_LYMPHOID_TISSUE	cell culture	female	SRP186687	haematopoietic_and_lymphoid_tissue
SRR8615874	64	RNA-Seq	GCA_000001405.13	202	16284953564	NIBRI	PRJNA523380	SAMN10987765	Human	8158752416	OV-90	BROAD INSTITUTE	public	bam,sra	s3,gs,ncbi	s3.us-east-1,gs.US,ncbi.public	carcinoma (mixed_carcinoma)	metastasis	Caucasian	SRX5415176	Illumina HiSeq 2500	cell line	RNASeq-OV90_OVARY	PAIRED	cDNA	TRANSCRIPTOMIC	Homo sapiens	ILLUMINA	2019-03-27T00:00:00Z	OV90_OVARY	cell culture	female	SRP186687	ovary
SRR8615224	NA	RNA-Seq	GCA_000001405.13	202	17142079964	NA	PRJNA523380	SAMN10989617	Human	9255135797	OCI-MY7	BROAD INSTITUTE	public	bam,sra	gs,ncbi,s3	gs.US,ncbi.public,s3.us-east-1	NA	NA	NA	SRX5414529	Illumina HiSeq 2500	cell line	RNASeq-OCIMY7_HAEMATOPOIETIC_AND_LYMPHOID_TISSUE	PAIRED	cDNA	TRANSCRIPTOMIC	Homo sapiens	ILLUMINA	2019-03-27T00:00:00Z	OCIMY7_HAEMATOPOIETIC_AND_LYMPHOID_TISSUE	cell culture	NA	SRP186687	haematopoietic_and_lymphoid_tissue
SRR8615245	69	RNA-Seq	GCA_000001405.13	202	18404540372	ATCC:SW 1271	PRJNA523380	SAMN10987907	Human	9213617117	SW 1271	BROAD INSTITUTE	public	bam,sra	gs,ncbi,s3	gs.US,ncbi.public,s3.us-east-1	carcinoma (small_cell_carcinoma)	primary	Caucasian	SRX5414508	Illumina HiSeq 2500	cell line	RNASeq-SW1271_LUNG	PAIRED	cDNA	TRANSCRIPTOMIC	Homo sapiens	ILLUMINA	2019-03-27T00:00:00Z	SW1271_LUNG	cell culture	male	SRP186687	lung
SRR8615259	NA	RNA-Seq	GCA_000001405.13	202	17272909506	NA	PRJNA523380	SAMN10989609	Human	9244899473	NCI-H2004 RT	BROAD INSTITUTE	public	bam,sra	gs,ncbi,s3	gs.US,ncbi.public,s3.us-east-1	NA	NA	NA	SRX5414494	Illumina HiSeq 2500	cell line	RNASeq-NCIH2004RT_SOFT_TISSUE	PAIRED	cDNA	TRANSCRIPTOMIC	Homo sapiens	ILLUMINA	2019-03-27T00:00:00Z	NCIH2004RT_SOFT_TISSUE	cell culture	NA	SRP186687	soft_tissue
SRR8615289	50	RNA-Seq	GCA_000001405.13	202	18050049764	DSMZ:EFM-19	PRJNA523380	SAMN10988267	Human	9671542852	EFM-19	BROAD INSTITUTE	public	bam,sra	gs,ncbi,s3	gs.US,ncbi.public,s3.us-east-1	carcinoma (ductal_carcinoma)	metastasis	Caucasian	SRX5414464	Illumina HiSeq 2500	cell line	RNASeq-EFM19_BREAST	PAIRED	cDNA	TRANSCRIPTOMIC	Homo sapiens	ILLUMINA	2019-03-27T00:00:00Z	EFM19_BREAST	cell culture	female	SRP186687	breast
SRR8615308	NA	RNA-Seq	GCA_000001405.13	202	19983963424	KCLB:SNU-245	PRJNA523380	SAMN10988083	Human	10753671373	SNU-245	BROAD INSTITUTE	public	bam,sra	gs,ncbi,s3	gs.US,ncbi.public,s3.us-east-1	carcinoma	primary	Asian	SRX5414445	Illumina HiSeq 2500	cell line	RNASeq-SNU245_BILIARY_TRACT	PAIRED	cDNA	TRANSCRIPTOMIC	Homo sapiens	ILLUMINA	2019-03-27T00:00:00Z	SNU245_BILIARY_TRACT	cell culture	NA	SRP186687	biliary_tract
SRR8615315	75	RNA-Seq	GCA_000001405.13	202	23335050100	DSMZ:CAL-54	PRJNA523380	SAMN10988487	Human	13026353144	CAL-54	BROAD INSTITUTE	public	bam,sra	gs,ncbi,s3	gs.US,ncbi.public,s3.us-east-1	carcinoma (renal_cell_carcinoma)	metastasis	Caucasian	SRX5414438	Illumina HiSeq 2500	cell line	RNASeq-CAL54_KIDNEY	PAIRED	cDNA	TRANSCRIPTOMIC	Homo sapiens	ILLUMINA	2019-03-27T00:00:00Z	CAL54_KIDNEY	cell culture	male	SRP186687	kidney
SRR8615351	64	RNA-Seq	GCA_000001405.13	202	17000838938	DSMZ:KMS-12-BM	PRJNA523380	SAMN10988243	Human	9046893634	KMS-12-BM	BROAD INSTITUTE	public	bam,sra	gs,ncbi,s3	gs.US,ncbi.public,s3.us-east-1	lymphoid_neoplasm (plasma_cell_myeloma)	primary	Asian	SRX5414402	Illumina HiSeq 2500	cell line	RNASeq-KMS12BM_HAEMATOPOIETIC_AND_LYMPHOID_TISSUE	PAIRED	cDNA	TRANSCRIPTOMIC	Homo sapiens	ILLUMINA	2019-03-27T00:00:00Z	KMS12BM_HAEMATOPOIETIC_AND_LYMPHOID_TISSUE	cell culture	female	SRP186687	haematopoietic_and_lymphoid_tissue
SRR8615361	7	RNA-Seq	GCA_000001405.13	202	17839967946	GNF	PRJNA523380	SAMN10988020	Human	8793297021	KASUMI-1	BROAD INSTITUTE	public	bam,sra	gs,ncbi,s3	gs.US,ncbi.public,s3.us-east-1	haematopoietic_neoplasm (acute_myeloid_leukaemia\, M2)	primary	Asian	SRX5414392	Illumina HiSeq 2500	cell line	RNASeq-KASUMI1_HAEMATOPOIETIC_AND_LYMPHOID_TISSUE	PAIRED	cDNA	TRANSCRIPTOMIC	Homo sapiens	ILLUMINA	2019-03-27T00:00:00Z	KASUMI1_HAEMATOPOIETIC_AND_LYMPHOID_TISSUE	cell culture	male	SRP186687	haematopoietic_and_lymphoid_tissue
SRR8615364	NA	RNA-Seq	GCA_000001405.13	202	11978868660	NA	PRJNA523380	SAMN10989606	Human	5477519675	KD	BROAD INSTITUTE	public	bam,sra	gs,ncbi,s3	gs.US,ncbi.public,s3.us-east-1	NA	NA	NA	SRX5414389	Illumina HiSeq 2500	cell line	RNASeq-KD_SOFT_TISSUE	PAIRED	cDNA	TRANSCRIPTOMIC	Homo sapiens	ILLUMINA	2019-03-27T00:00:00Z	KD_SOFT_TISSUE	cell culture	NA	SRP186687	soft_tissue
SRR8615365	32	RNA-Seq	GCA_000001405.13	202	13812705662	DSMZ:KCL-22	PRJNA523380	SAMN10988558	Human	6531111615	KCL-22	BROAD INSTITUTE	public	bam,sra	gs,ncbi,s3	gs.US,ncbi.public,s3.us-east-1	haematopoietic_neoplasm (blast_phase_chronic_myeloid_leukaemia)	metastasis	Asian	SRX5414388	Illumina HiSeq 2500	cell line	RNASeq-KCL22_HAEMATOPOIETIC_AND_LYMPHOID_TISSUE	PAIRED	cDNA	TRANSCRIPTOMIC	Homo sapiens	ILLUMINA	2019-03-27T00:00:00Z	KCL22_HAEMATOPOIETIC_AND_LYMPHOID_TISSUE	cell culture	female	SRP186687	haematopoietic_and_lymphoid_tissue
SRR8615372	11	RNA-Seq	GCA_000001405.13	202	24952661858	DSMZ:SR-786	PRJNA523380	SAMN10988434	Human	12238910696	SR-786	BROAD INSTITUTE	public	bam,sra	gs,ncbi,s3	gs.US,ncbi.public,s3.us-east-1	lymphoid_neoplasm (anaplastic_large_cell_lymphoma)	metastasis	Caucasian	SRX5414381	Illumina HiSeq 2500	cell line	RNASeq-SR786_HAEMATOPOIETIC_AND_LYMPHOID_TISSUE	PAIRED	cDNA	TRANSCRIPTOMIC	Homo sapiens	ILLUMINA	2019-03-27T00:00:00Z	SR786_HAEMATOPOIETIC_AND_LYMPHOID_TISSUE	cell culture	male	SRP186687	haematopoietic_and_lymphoid_tissue
SRR8615380	58	RNA-Seq	GCA_000001405.13	202	17927026714	DSMZ:GRANTA-519	PRJNA523380	SAMN10988429	Human	10097517810	GRANTA-519	BROAD INSTITUTE	public	bam,sra	gs,ncbi,s3	gs.US,ncbi.public,s3.us-east-1	lymphoid_neoplasm (mantle_cell_lymphoma)	primary	Caucasian	SRX5414373	Illumina HiSeq 2500	cell line	RNASeq-GRANTA519_HAEMATOPOIETIC_AND_LYMPHOID_TISSUE	PAIRED	cDNA	TRANSCRIPTOMIC	Homo sapiens	ILLUMINA	2019-03-27T00:00:00Z	GRANTA519_HAEMATOPOIETIC_AND_LYMPHOID_TISSUE	cell culture	female	SRP186687	haematopoietic_and_lymphoid_tissue
SRR8615383	49	RNA-Seq	GCA_000001405.13	202	19246942588	DSMZ:GMS-10	PRJNA523380	SAMN10988272	Human	10258733387	GMS-10	BROAD INSTITUTE	public	bam,sra	gs,ncbi,s3	gs.US,ncbi.public,s3.us-east-1	glioma (astrocytoma_Grade_IV\, glioblastoma_multiforme)	primary	Caucasian	SRX5414370	Illumina HiSeq 2500	cell line	RNASeq-GMS10_CENTRAL_NERVOUS_SYSTEM	PAIRED	cDNA	TRANSCRIPTOMIC	Homo sapiens	ILLUMINA	2019-03-27T00:00:00Z	GMS10_CENTRAL_NERVOUS_SYSTEM	cell culture	male	SRP186687	central_nervous_system
SRR8615406	NA	RNA-Seq	GCA_000001405.13	202	14275441606	RIKEN:ACC-MESO-1	PRJNA523380	SAMN10987705	Human	7140029928	ACC-MESO-1	BROAD INSTITUTE	public	bam,sra	gs,ncbi,s3	gs.US,ncbi.public,s3.us-east-1	mesothelioma	metastasis	Asian	SRX5414347	Illumina HiSeq 2500	cell line	RNASeq-ACCMESO1_PLEURA	PAIRED	cDNA	TRANSCRIPTOMIC	Homo sapiens	ILLUMINA	2019-03-27T00:00:00Z	ACCMESO1_PLEURA	cell culture	NA	SRP186687	pleura
SRR8615413	55	RNA-Seq	GCA_000001405.13	202	19065897058	ATCC:AN3 CA	PRJNA523380	SAMN10988375	Human	9598509831	AN3 CA	BROAD INSTITUTE	public	bam,sra	gs,ncbi,s3	gs.US,ncbi.public,s3.us-east-1	carcinoma (adenocarcinoma)	metastasis	Caucasian	SRX5414340	Illumina HiSeq 2500	cell line	RNASeq-AN3CA_ENDOMETRIUM	PAIRED	cDNA	TRANSCRIPTOMIC	Homo sapiens	ILLUMINA	2019-03-27T00:00:00Z	AN3CA_ENDOMETRIUM	cell culture	female	SRP186687	endometrium
SRR8615421	47	RNA-Seq	GCA_000001405.13	202	17038632936	GNF	PRJNA523380	SAMN10988552	Human	8362650752	Hs 343.T	BROAD INSTITUTE	public	bam,sra	gs,ncbi,s3	gs.US,ncbi.public,s3.us-east-1	carcinoma	primary	Caucasian	SRX5414332	Illumina HiSeq 2500	cell line	RNASeq-HS343T_FIBROBLAST	PAIRED	cDNA	TRANSCRIPTOMIC	Homo sapiens	ILLUMINA	2019-03-27T00:00:00Z	HS343T_FIBROBLAST	cell culture	female	SRP186687	breast
SRR8615427	64	RNA-Seq	GCA_000001405.13	202	21653014280	ECACC:COR-L95	PRJNA523380	SAMN10988007	Human	12094599413	COR-L95	BROAD INSTITUTE	public	bam,sra	gs,ncbi,s3	gs.US,ncbi.public,s3.us-east-1	carcinoma (small_cell_carcinoma)	primary	Caucasian	SRX5414326	Illumina HiSeq 2500	cell line	RNASeq-CORL95_LUNG	PAIRED	cDNA	TRANSCRIPTOMIC	Homo sapiens	ILLUMINA	2019-03-27T00:00:00Z	CORL95_LUNG	cell culture	male	SRP186687	lung
SRR8615444	NA	RNA-Seq	GCA_000001405.13	202	17923012772	NA	PRJNA523380	SAMN10989615	Human	9610745324	NHAHTDD	BROAD INSTITUTE	public	bam,sra	gs,ncbi,s3	gs.US,ncbi.public,s3.us-east-1	NA	NA	NA	SRX5414309	Illumina HiSeq 2500	cell line	RNASeq-NHAHTDD_CENTRAL_NERVOUS_SYSTEM	PAIRED	cDNA	TRANSCRIPTOMIC	Homo sapiens	ILLUMINA	2019-03-27T00:00:00Z	NHAHTDD_CENTRAL_NERVOUS_SYSTEM	cell culture	NA	SRP186687	central_nervous_system
SRR8615449	56	RNA-Seq	GCA_000001405.13	202	20683419936	NIBRI	PRJNA523380	SAMN10988111	Human	10896037326	NUGC-2	BROAD INSTITUTE	public	bam,sra	gs,ncbi,s3	gs.US,ncbi.public,s3.us-east-1	carcinoma (adenocarcinoma)	primary	Asian	SRX5414304	Illumina HiSeq 2500	cell line	RNASeq-NUGC2_STOMACH	PAIRED	cDNA	TRANSCRIPTOMIC	Homo sapiens	ILLUMINA	2019-03-27T00:00:00Z	NUGC2_STOMACH	cell culture	female	SRP186687	stomach
SRR8615451	NA	RNA-Seq	GCA_000001405.13	202	18376858898	NIBRI	PRJNA523380	SAMN10988141	Human	9017491743	HCC-56	BROAD INSTITUTE	public	bam,sra	gs,ncbi,s3	gs.US,ncbi.public,s3.us-east-1	carcinoma (adenocarcinoma)	primary	Asian	SRX5414302	Illumina HiSeq 2500	cell line	RNASeq-HCC56_LARGE_INTESTINE	PAIRED	cDNA	TRANSCRIPTOMIC	Homo sapiens	ILLUMINA	2019-03-27T00:00:00Z	HCC56_LARGE_INTESTINE	cell culture	NA	SRP186687	large_intestine
SRR8615482	77	RNA-Seq	GCA_000001405.13	202	15880071834	DSMZ:KYSE-70	PRJNA523380	SAMN10988277	Human	7483256225	KYSE-70	BROAD INSTITUTE	public	bam,sra	gs,ncbi,s3	gs.US,ncbi.public,s3.us-east-1	carcinoma (squamous_cell_carcinoma)	primary	Asian	SRX5414271	Illumina HiSeq 2500	cell line	RNASeq-KYSE70_OESOPHAGUS	PAIRED	cDNA	TRANSCRIPTOMIC	Homo sapiens	ILLUMINA	2019-03-27T00:00:00Z	KYSE70_OESOPHAGUS	cell culture	male	SRP186687	oesophagus
SRR8615491	NA	RNA-Seq	GCA_000001405.13	202	17334818466	NA	PRJNA523380	SAMN10988414	Human	9255831692	IOMM-Lee	BROAD INSTITUTE	public	bam,sra	gs,ncbi,s3	gs.US,ncbi.public,s3.us-east-1	meningioma	NA	Asian	SRX5414262	Illumina HiSeq 2500	cell line	RNASeq-IOMMLEE_CENTRAL_NERVOUS_SYSTEM	PAIRED	cDNA	TRANSCRIPTOMIC	Homo sapiens	ILLUMINA	2019-03-27T00:00:00Z	IOMMLEE_CENTRAL_NERVOUS_SYSTEM	cell culture	NA	SRP186687	central_nervous_system
SRR8615502	6	RNA-Seq	GCA_000001405.13	202	21223520062	ATCC:SK-N-AS	PRJNA523380	SAMN10987940	Human	11426798735	SK-N-AS	BROAD INSTITUTE	public	bam,sra	gs,ncbi,s3	gs.US,ncbi.public,s3.us-east-1	neuroblastoma	primary	Caucasian	SRX5414251	Illumina HiSeq 2500	cell line	RNASeq-SKNAS_AUTONOMIC_GANGLIA	PAIRED	cDNA	TRANSCRIPTOMIC	Homo sapiens	ILLUMINA	2019-03-27T00:00:00Z	SKNAS_AUTONOMIC_GANGLIA	cell culture	female	SRP186687	autonomic_ganglia
SRR8615504	82	RNA-Seq	GCA_000001405.13	198	10017528298	NIBRI	PRJNA523380	SAMN10988325	Human	4685215808	SW48	BROAD INSTITUTE	public	bam,sra	gs,ncbi,s3	gs.US,ncbi.public,s3.us-east-1	carcinoma (adenocarcinoma)	primary	Caucasian	SRX5414249	Illumina HiSeq 2500	cell line	RNASeq-SW48_LARGE_INTESTINE	PAIRED	cDNA	TRANSCRIPTOMIC	Homo sapiens	ILLUMINA	2019-03-27T00:00:00Z	SW48_LARGE_INTESTINE	cell culture	female	SRP186687	large_intestine
SRR8615548	NA	RNA-Seq	GCA_000001405.13	202	15399806936	NA	PRJNA523380	SAMN10988416	Human	8252159148	LNZ308	BROAD INSTITUTE	public	bam,sra	gs,ncbi,s3	gs.US,ncbi.public,s3.us-east-1	glioma (astrocytoma_Grade_IV)	NA	Caucasian	SRX5414852	Illumina HiSeq 2500	cell line	RNASeq-LNZ308_CENTRAL_NERVOUS_SYSTEM	PAIRED	cDNA	TRANSCRIPTOMIC	Homo sapiens	ILLUMINA	2019-03-27T00:00:00Z	LNZ308_CENTRAL_NERVOUS_SYSTEM	cell culture	female	SRP186687	central_nervous_system
SRR8615578	51	RNA-Seq	GCA_000001405.13	202	10801936870	ATCC:MDA-MB-468	PRJNA523380	SAMN10988340	Human	5115681324	MDA-MB-468	BROAD INSTITUTE	public	bam,sra	gs,ncbi,s3	gs.US,ncbi.public,s3.us-east-1	carcinoma	metastasis	African_american	SRX5414822	Illumina HiSeq 2500	cell line	RNASeq-MDAMB468_BREAST	PAIRED	cDNA	TRANSCRIPTOMIC	Homo sapiens	ILLUMINA	2019-03-27T00:00:00Z	MDAMB468_BREAST	cell culture	female	SRP186687	breast
SRR8615694	19	RNA-Seq	GCA_000001405.13	202	23189061266	PT-6ZZI	PRJNA523380	SAMN10989586	Human	12231679261	MOLT-3	BROAD INSTITUTE	public	bam,sra	gs,ncbi,s3	gs.US,ncbi.public,s3.us-east-1	lymphoid_neoplasm (acute_lymphoblastic_T_cell_leukaemia)	NA	Caucasian	SRX5414706	Illumina HiSeq 2500	cell line	RNASeq-MOLT3_HAEMATOPOIETIC_AND_LYMPHOID_TISSUE	PAIRED	cDNA	TRANSCRIPTOMIC	Homo sapiens	ILLUMINA	2019-03-27T00:00:00Z	MOLT3_HAEMATOPOIETIC_AND_LYMPHOID_TISSUE	cell culture	male	SRP186687	haematopoietic_and_lymphoid_tissue
SRR8615697	NA	RNA-Seq	GCA_000001405.13	202	10280274092	NA	PRJNA523380	SAMN10989608	Human	4665809071	MON	BROAD INSTITUTE	public	bam,sra	gs,ncbi,s3	gs.US,ncbi.public,s3.us-east-1	NA	NA	NA	SRX5414703	Illumina HiSeq 2500	cell line	RNASeq-MON_SOFT_TISSUE	PAIRED	cDNA	TRANSCRIPTOMIC	Homo sapiens	ILLUMINA	2019-03-27T00:00:00Z	MON_SOFT_TISSUE	cell culture	NA	SRP186687	soft_tissue
SRR8615701	29	RNA-Seq	GCA_000001405.13	202	10862899460	DSMZ:MUTZ-3	PRJNA523380	SAMN10989596	Human	5698635897	MUTZ-3	BROAD INSTITUTE	public	bam,sra	gs,ncbi,s3	gs.US,ncbi.public,s3.us-east-1	haematopoietic_neoplasm (acute_myeloid_leukaemia\, M4)	primary	Caucasian	SRX5414699	Illumina HiSeq 2500	cell line	RNASeq-MUTZ3_HAEMATOPOIETIC_AND_LYMPHOID_TISSUE	PAIRED	cDNA	TRANSCRIPTOMIC	Homo sapiens	ILLUMINA	2019-03-27T00:00:00Z	MUTZ3_HAEMATOPOIETIC_AND_LYMPHOID_TISSUE	cell culture	male	SRP186687	haematopoietic_and_lymphoid_tissue
SRR8615741	41	RNA-Seq	GCA_000001405.13	202	26605980550	ATCC:GA-10	PRJNA523380	SAMN10987941	Human	14886119669	GA-10	BROAD INSTITUTE	public	bam,sra	gs,ncbi,s3	gs.US,ncbi.public,s3.us-east-1	lymphoid_neoplasm (Burkitt_lymphoma)	primary	Caucasian	SRX5414659	Illumina HiSeq 2500	cell line	RNASeq-GA10_HAEMATOPOIETIC_AND_LYMPHOID_TISSUE	PAIRED	cDNA	TRANSCRIPTOMIC	Homo sapiens	ILLUMINA	2019-03-27T00:00:00Z	GA10_HAEMATOPOIETIC_AND_LYMPHOID_TISSUE	cell culture	male	SRP186687	haematopoietic_and_lymphoid_tissue
SRR8615782	60	RNA-Seq	GCA_000001405.13	202	17659311670	ATCC:Hs 618.T	PRJNA523380	SAMN10987679	Human	8702918565	Hs 618.T	BROAD INSTITUTE	public	bam,sra	gs,ncbi,s3	gs.US,ncbi.public,s3.us-east-1	carcinoma (adenocarcinoma)	primary	Caucasian	SRX5414618	Illumina HiSeq 2500	cell line	RNASeq-HS618T_FIBROBLAST	PAIRED	cDNA	TRANSCRIPTOMIC	Homo sapiens	ILLUMINA	2019-03-27T00:00:00Z	HS618T_FIBROBLAST	cell culture	female	SRP186687	lung
SRR8615783	NA	RNA-Seq	GCA_000001405.13	202	19953864010	NIBRI	PRJNA523380	SAMN10988123	Human	9757111040	Hs 675.T	BROAD INSTITUTE	public	bam,sra	gs,ncbi,s3	gs.US,ncbi.public,s3.us-east-1	carcinoma	primary	Caucasian	SRX5414617	Illumina HiSeq 2500	cell line	RNASeq-HS675T_FIBROBLAST	PAIRED	cDNA	TRANSCRIPTOMIC	Homo sapiens	ILLUMINA	2019-03-27T00:00:00Z	HS675T_FIBROBLAST	cell culture	male	SRP186687	large_intestine
SRR8615814	65	RNA-Seq	GCA_000001405.13	202	23051097892	ATCC:NCI-H2126	PRJNA523380	SAMN10988437	Human	12189452072	NCI-H2126	BROAD INSTITUTE	public	bam,sra	gs,ncbi,s3	gs.US,ncbi.public,s3.us-east-1	carcinoma (adenocarcinoma)	metastasis	Caucasian	SRX5414586	Illumina HiSeq 2500	cell line	RNASeq-NCIH2126_LUNG	PAIRED	cDNA	TRANSCRIPTOMIC	Homo sapiens	ILLUMINA	2019-03-27T00:00:00Z	NCIH2126_LUNG	cell culture	male	SRP186687	lung
SRR8615844	47	RNA-Seq	GCA_000001405.13	202	17236340234	NCI/DCTD	PRJNA523380	SAMN10988218	Human	9002859923	IGROV1	BROAD INSTITUTE	public	bam,sra	gs,ncbi,s3	gs.US,ncbi.public,s3.us-east-1	carcinoma (adenocarcinoma)	primary	Caucasian	SRX5414556	Illumina HiSeq 2500	cell line	RNASeq-IGROV1_OVARY	PAIRED	cDNA	TRANSCRIPTOMIC	Homo sapiens	ILLUMINA	2019-03-27T00:00:00Z	IGROV1_OVARY	cell culture	female	SRP186687	ovary
SRR8615860	NA	RNA-Seq	GCA_000001405.13	202	19786129876	NA	PRJNA523380	SAMN10988408	Human	10593221415	SK-RC-20	BROAD INSTITUTE	public	bam,sra	gs,ncbi,s3	gs.US,ncbi.public,s3.us-east-1	carcinoma (clear_cell_renal_cell_carcinoma)	NA	Caucasian	SRX5414540	Illumina HiSeq 2500	cell line	RNASeq-SKRC20_KIDNEY	PAIRED	cDNA	TRANSCRIPTOMIC	Homo sapiens	ILLUMINA	2019-03-27T00:00:00Z	SKRC20_KIDNEY	cell culture	NA	SRP186687	kidney
SRR8615940	11	RNA-Seq	GCA_000001405.13	202	22790709388	NIBRI	PRJNA523380	SAMN10987939	Human	12306163412	SK-N-FI	BROAD INSTITUTE	public	bam,sra	gs,ncbi,s3	gs.US,ncbi.public,s3.us-east-1	neuroblastoma	metastasis	Caucasian	SRX5415110	Illumina HiSeq 2500	cell line	RNASeq-SKNFI_AUTONOMIC_GANGLIA	PAIRED	cDNA	TRANSCRIPTOMIC	Homo sapiens	ILLUMINA	2019-03-27T00:00:00Z	SKNFI_AUTONOMIC_GANGLIA	cell culture	male	SRP186687	autonomic_ganglia
SRR8615941	60	RNA-Seq	GCA_000001405.13	202	17798150108	HSRRB	PRJNA523380	SAMN10987826	Human	9529879369	KMS-34	BROAD INSTITUTE	public	bam,sra	gs,ncbi,s3	gs.US,ncbi.public,s3.us-east-1	lymphoid_neoplasm (plasma_cell_myeloma)	primary	Asian	SRX5415109	Illumina HiSeq 2500	cell line	RNASeq-KMS34_HAEMATOPOIETIC_AND_LYMPHOID_TISSUE	PAIRED	cDNA	TRANSCRIPTOMIC	Homo sapiens	ILLUMINA	2019-03-27T00:00:00Z	KMS34_HAEMATOPOIETIC_AND_LYMPHOID_TISSUE	cell culture	female	SRP186687	haematopoietic_and_lymphoid_tissue
SRR8615957	6	RNA-Seq	GCA_000001405.13	202	23596638484	NIBRI	PRJNA523380	SAMN10987924	Human	13275173101	D283 Med	BROAD INSTITUTE	public	bam,sra	gs,ncbi,s3	gs.US,ncbi.public,s3.us-east-1	primitive_neuroectodermal_tumour-medulloblastoma	metastasis	Caucasian	SRX5415093	Illumina HiSeq 2500	cell line	RNASeq-D283MED_CENTRAL_NERVOUS_SYSTEM	PAIRED	cDNA	TRANSCRIPTOMIC	Homo sapiens	ILLUMINA	2019-03-27T00:00:00Z	D283MED_CENTRAL_NERVOUS_SYSTEM	cell culture	male	SRP186687	central_nervous_system
SRR8616003	44	RNA-Seq	GCA_000001405.13	202	18366064018	ATCC:DMS 153	PRJNA523380	SAMN10988118	Human	9062102940	DMS 153	BROAD INSTITUTE	public	bam,sra	gs,ncbi,s3	gs.US,ncbi.public,s3.us-east-1	carcinoma (small_cell_carcinoma)	metastasis	Caucasian	SRX5415047	Illumina HiSeq 2500	cell line	RNASeq-DMS153_LUNG	PAIRED	cDNA	TRANSCRIPTOMIC	Homo sapiens	ILLUMINA	2019-03-27T00:00:00Z	DMS153_LUNG	cell culture	male	SRP186687	lung
SRR8616016	52	RNA-Seq	GCA_000001405.13	202	15356913246	JCRB:A4/Fuk	PRJNA523380	SAMN10987839	Human	7757033187	A4/Fuk	BROAD INSTITUTE	public	bam,sra	gs,ncbi,s3	gs.US,ncbi.public,s3.us-east-1	lymphoid_neoplasm (diffuse_large_B_cell_lymphoma)	primary	Asian	SRX5415034	Illumina HiSeq 2500	cell line	RNASeq-A4FUK_HAEMATOPOIETIC_AND_LYMPHOID_TISSUE	PAIRED	cDNA	TRANSCRIPTOMIC	Homo sapiens	ILLUMINA	2019-03-27T00:00:00Z	A4FUK_HAEMATOPOIETIC_AND_LYMPHOID_TISSUE	cell culture	female	SRP186687	haematopoietic_and_lymphoid_tissue
SRR8616031	53	RNA-Seq	GCA_000001405.13	202	15398839154	KCLB:SNU-719	PRJNA523380	SAMN10988060	Human	8291390275	SNU-719	BROAD INSTITUTE	public	bam,sra	gs,ncbi,s3	gs.US,ncbi.public,s3.us-east-1	carcinoma	primary	Asian	SRX5415019	Illumina HiSeq 2500	cell line	RNASeq-SNU719_STOMACH	PAIRED	cDNA	TRANSCRIPTOMIC	Homo sapiens	ILLUMINA	2019-03-27T00:00:00Z	SNU719_STOMACH	cell culture	male	SRP186687	stomach
SRR8616096	46	RNA-Seq	GCA_000001405.13	202	17784911836	DSMZ:SCLC-21H	PRJNA523380	SAMN10988516	Human	8973902723	SCLC-21H	BROAD INSTITUTE	public	bam,sra	gs,ncbi,s3	gs.US,ncbi.public,s3.us-east-1	carcinoma (small_cell_carcinoma)	metastasis	Caucasian	SRX5414954	Illumina HiSeq 2500	cell line	RNASeq-SCLC21H_LUNG	PAIRED	cDNA	TRANSCRIPTOMIC	Homo sapiens	ILLUMINA	2019-03-27T00:00:00Z	SCLC21H_LUNG	cell culture	male	SRP186687	lung
SRR8616113	57	RNA-Seq	GCA_000001405.13	202	19132622506	NA	PRJNA523380	SAMN10987985	Human	9442799741	NCI-H2286	BROAD INSTITUTE	public	bam,sra	gs,ncbi,s3	gs.US,ncbi.public,s3.us-east-1	carcinoma (small_cell_carcinoma)	primary	Caucasian	SRX5414937	Illumina HiSeq 2500	cell line	RNASeq-NCIH2286_LUNG	PAIRED	cDNA	TRANSCRIPTOMIC	Homo sapiens	ILLUMINA	2019-03-27T00:00:00Z	NCIH2286_LUNG	cell culture	female	SRP186687	lung
SRR8615298	67	RNA-Seq	GCA_000001405.13	202	17484493396	ECACC:PE/CA-PJ41 (clone D2)	PRJNA523380	SAMN10988012	Human	9413258971	PE/CA-PJ41 (clone D2)	BROAD INSTITUTE	public	bam,sra	gs,ncbi,s3	gs.US,ncbi.public,s3.us-east-1	carcinoma (squamous_cell_carcinoma)	primary	Caucasian	SRX5414455	Illumina HiSeq 2500	cell line	RNASeq-PECAPJ41CLONED2_UPPER_AERODIGESTIVE_TRACT	PAIRED	cDNA	TRANSCRIPTOMIC	Homo sapiens	ILLUMINA	2019-03-27T00:00:00Z	PECAPJ41CLONED2_UPPER_AERODIGESTIVE_TRACT	cell culture	female	SRP186687	upper_aerodigestive_tract
SRR8615306	NA	RNA-Seq	GCA_000001405.13	202	20309579546	KCLB:SNU-308	PRJNA523380	SAMN10988081	Human	10953452293	SNU-308	BROAD INSTITUTE	public	bam,sra	gs,ncbi,s3	gs.US,ncbi.public,s3.us-east-1	carcinoma	primary	Asian	SRX5414447	Illumina HiSeq 2500	cell line	RNASeq-SNU308_BILIARY_TRACT	PAIRED	cDNA	TRANSCRIPTOMIC	Homo sapiens	ILLUMINA	2019-03-27T00:00:00Z	SNU308_BILIARY_TRACT	cell culture	NA	SRP186687	biliary_tract
SRR8615318	26	RNA-Seq	GCA_000001405.13	202	24132285924	DSMZ:NALM-19	PRJNA523380	SAMN10988461	Human	12702764030	NALM-19	BROAD INSTITUTE	public	bam,sra	gs,ncbi,s3	gs.US,ncbi.public,s3.us-east-1	lymphoid_neoplasm (acute_lymphoblastic_B_cell_leukaemia)	primary	Asian	SRX5414435	Illumina HiSeq 2500	cell line	RNASeq-NALM19_HAEMATOPOIETIC_AND_LYMPHOID_TISSUE	PAIRED	cDNA	TRANSCRIPTOMIC	Homo sapiens	ILLUMINA	2019-03-27T00:00:00Z	NALM19_HAEMATOPOIETIC_AND_LYMPHOID_TISSUE	cell culture	male	SRP186687	haematopoietic_and_lymphoid_tissue
SRR8615387	NA	RNA-Seq	GCA_000001405.13	202	14480478474	RIKEN:Li-7	PRJNA523380	SAMN10987749	Human	6839915678	Li-7	BROAD INSTITUTE	public	bam,sra	gs,ncbi,s3	gs.US,ncbi.public,s3.us-east-1	carcinoma (hepatocellular_carcinoma)	primary	Asian	SRX5414366	Illumina HiSeq 2500	cell line	RNASeq-LI7_LIVER	PAIRED	cDNA	TRANSCRIPTOMIC	Homo sapiens	ILLUMINA	2019-03-27T00:00:00Z	LI7_LIVER	cell culture	NA	SRP186687	liver
SRR8615555	54	RNA-Seq	GCA_000001405.13	202	13997023996	DSMZ:JL-1	PRJNA523380	SAMN10988459	Human	6629968232	JL-1	BROAD INSTITUTE	public	bam,sra	gs,ncbi,s3	gs.US,ncbi.public,s3.us-east-1	mesothelioma	primary	Caucasian	SRX5414845	Illumina HiSeq 2500	cell line	RNASeq-JL1_PLEURA	PAIRED	cDNA	TRANSCRIPTOMIC	Homo sapiens	ILLUMINA	2019-03-27T00:00:00Z	JL1_PLEURA	cell culture	male	SRP186687	pleura
SRR8615757	NA	RNA-Seq	GCA_000001405.13	202	12766895102	HSRRB	PRJNA523380	SAMN10988206	Human	6044064634	MCAS	BROAD INSTITUTE	public	bam,sra	gs,ncbi,s3	gs.US,ncbi.public,s3.us-east-1	carcinoma (adenocarcinoma)	primary	Asian	SRX5414643	Illumina HiSeq 2500	cell line	RNASeq-MCAS_OVARY	PAIRED	cDNA	TRANSCRIPTOMIC	Homo sapiens	ILLUMINA	2019-03-27T00:00:00Z	MCAS_OVARY	cell culture	female	SRP186687	ovary
SRR8615861	75	RNA-Seq	GCA_000001405.13	202	22255464534	ATCC:SK-UT-1	PRJNA523380	SAMN10987664	Human	11952884892	SK-UT-1	BROAD INSTITUTE	public	bam,sra	gs,ncbi,s3	gs.US,ncbi.public,s3.us-east-1	leiomyosarcoma	primary	Caucasian	SRX5414539	Illumina HiSeq 2500	cell line	RNASeq-SKUT1_SOFT_TISSUE	PAIRED	cDNA	TRANSCRIPTOMIC	Homo sapiens	ILLUMINA	2019-03-27T00:00:00Z	SKUT1_SOFT_TISSUE	cell culture	female	SRP186687	soft_tissue
SRR8615916	NA	RNA-Seq	GCA_000001405.13	202	19344694226	RIKEN:JHOM-1	PRJNA523380	SAMN10987700	Human	10328525768	JHOM-1	BROAD INSTITUTE	public	bam,sra	gs,ncbi,s3	gs.US,ncbi.public,s3.us-east-1	carcinoma (adenocarcinoma)	primary	Asian	SRX5415134	Illumina HiSeq 2500	cell line	RNASeq-JHOM1_OVARY	PAIRED	cDNA	TRANSCRIPTOMIC	Homo sapiens	ILLUMINA	2019-03-27T00:00:00Z	JHOM1_OVARY	cell culture	female	SRP186687	ovary
SRR8615225	38	RNA-Seq	GCA_000001405.13	202	16879950018	NIBRI	PRJNA523380	SAMN10987922	Human	8469592715	OCUM-1	BROAD INSTITUTE	public	bam,sra	gs,ncbi,s3	gs.US,ncbi.public,s3.us-east-1	carcinoma (diffuse_adenocarcinoma)	primary	Asian	SRX5414528	Illumina HiSeq 2500	cell line	RNASeq-OCUM1_STOMACH	PAIRED	cDNA	TRANSCRIPTOMIC	Homo sapiens	ILLUMINA	2019-03-27T00:00:00Z	OCUM1_STOMACH	cell culture	female	SRP186687	stomach
SRR8615242	57	RNA-Seq	GCA_000001405.13	202	16095791876	DSMZ:OCI-AML3	PRJNA523380	SAMN10988470	Human	8083824926	OCI-AML3	BROAD INSTITUTE	public	bam,sra	gs,ncbi,s3	gs.US,ncbi.public,s3.us-east-1	haematopoietic_neoplasm (acute_myeloid_leukaemia\, M4)	primary	Caucasian	SRX5414511	Illumina HiSeq 2500	cell line	RNASeq-OCIAML3_HAEMATOPOIETIC_AND_LYMPHOID_TISSUE	PAIRED	cDNA	TRANSCRIPTOMIC	Homo sapiens	ILLUMINA	2019-03-27T00:00:00Z	OCIAML3_HAEMATOPOIETIC_AND_LYMPHOID_TISSUE	cell culture	male	SRP186687	haematopoietic_and_lymphoid_tissue
SRR8615261	68	RNA-Seq	GCA_000001405.13	202	14773549164	ATCC:NCI-H196	PRJNA523380	SAMN10988217	Human	7310162965	NCI-H196	BROAD INSTITUTE	public	bam,sra	gs,ncbi,s3	gs.US,ncbi.public,s3.us-east-1	carcinoma (small_cell_carcinoma)	metastasis	Caucasian	SRX5414492	Illumina HiSeq 2500	cell line	RNASeq-NCIH196_LUNG	PAIRED	cDNA	TRANSCRIPTOMIC	Homo sapiens	ILLUMINA	2019-03-27T00:00:00Z	NCIH196_LUNG	cell culture	male	SRP186687	lung
SRR8615286	NA	RNA-Seq	GCA_000001405.13	202	17438898158	Garraway Lab	PRJNA523380	SAMN10989588	Human	9355627186	EKVX	BROAD INSTITUTE	public	bam,sra	gs,ncbi,s3	gs.US,ncbi.public,s3.us-east-1	carcinoma (adenocarcinoma)	primary	Caucasian	SRX5414467	Illumina HiSeq 2500	cell line	RNASeq-EKVX_LUNG	PAIRED	cDNA	TRANSCRIPTOMIC	Homo sapiens	ILLUMINA	2019-03-27T00:00:00Z	EKVX_LUNG	cell culture	NA	SRP186687	lung
SRR8615295	NA	RNA-Seq	GCA_000001405.13	202	24285466564	RIKEN:PK-45H	PRJNA523380	SAMN10988107	Human	13069685038	PK-45H	BROAD INSTITUTE	public	bam,sra	gs,ncbi,s3	gs.US,ncbi.public,s3.us-east-1	carcinoma	primary	Asian	SRX5414458	Illumina HiSeq 2500	cell line	RNASeq-PK45H_PANCREAS	PAIRED	cDNA	TRANSCRIPTOMIC	Homo sapiens	ILLUMINA	2019-03-27T00:00:00Z	PK45H_PANCREAS	cell culture	NA	SRP186687	pancreas
SRR8615304	4	RNA-Seq	GCA_000001405.13	202	20896584072	HSRRB	PRJNA523380	SAMN10988124	Human	11222831907	PEER	BROAD INSTITUTE	public	bam,sra	gs,ncbi,s3	gs.US,ncbi.public,s3.us-east-1	lymphoid_neoplasm (acute_lymphoblastic_T_cell_leukaemia)	primary	Caucasian	SRX5414449	Illumina HiSeq 2500	cell line	RNASeq-PEER_HAEMATOPOIETIC_AND_LYMPHOID_TISSUE	PAIRED	cDNA	TRANSCRIPTOMIC	Homo sapiens	ILLUMINA	2019-03-27T00:00:00Z	PEER_HAEMATOPOIETIC_AND_LYMPHOID_TISSUE	cell culture	female	SRP186687	haematopoietic_and_lymphoid_tissue
SRR8615307	62	RNA-Seq	GCA_000001405.13	202	17414934292	KCLB:SNU-283	PRJNA523380	SAMN10988079	Human	8055276789	SNU-283	BROAD INSTITUTE	public	bam,sra	gs,ncbi,s3	gs.US,ncbi.public,s3.us-east-1	carcinoma	primary	Asian	SRX5414446	Illumina HiSeq 2500	cell line	RNASeq-SNU283_LARGE_INTESTINE	PAIRED	cDNA	TRANSCRIPTOMIC	Homo sapiens	ILLUMINA	2019-03-27T00:00:00Z	SNU283_LARGE_INTESTINE	cell culture	female	SRP186687	large_intestine
SRR8615342	36	RNA-Seq	GCA_000001405.13	202	26780461282	RIKEN:NCC-StC-K140	PRJNA523380	SAMN10988058	Human	14117321087	NCC-StC-K140	BROAD INSTITUTE	public	bam,sra	gs,ncbi,s3	gs.US,ncbi.public,s3.us-east-1	carcinoma	primary	Asian	SRX5414411	Illumina HiSeq 2500	cell line	RNASeq-NCCSTCK140_STOMACH	PAIRED	cDNA	TRANSCRIPTOMIC	Homo sapiens	ILLUMINA	2019-03-27T00:00:00Z	NCCSTCK140_STOMACH	cell culture	female	SRP186687	stomach
SRR8615347	50	RNA-Seq	GCA_000001405.13	202	18894465920	NA	PRJNA523380	SAMN10987818	Human	10117616696	KMS-26	BROAD INSTITUTE	public	bam,sra	gs,ncbi,s3	gs.US,ncbi.public,s3.us-east-1	lymphoid_neoplasm (plasma_cell_myeloma)	primary	Asian	SRX5414406	Illumina HiSeq 2500	cell line	RNASeq-KMS26_HAEMATOPOIETIC_AND_LYMPHOID_TISSUE	PAIRED	cDNA	TRANSCRIPTOMIC	Homo sapiens	ILLUMINA	2019-03-27T00:00:00Z	KMS26_HAEMATOPOIETIC_AND_LYMPHOID_TISSUE	cell culture	male	SRP186687	haematopoietic_and_lymphoid_tissue
SRR8615370	77	RNA-Seq	GCA_000001405.13	202	20085339750	ATCC:Panc 05.04	PRJNA523380	SAMN10988160	Human	10597872172	Panc 05.04	BROAD INSTITUTE	public	bam,sra	gs,ncbi,s3	gs.US,ncbi.public,s3.us-east-1	carcinoma	primary	Caucasian	SRX5414383	Illumina HiSeq 2500	cell line	RNASeq-PANC0504_PANCREAS	PAIRED	cDNA	TRANSCRIPTOMIC	Homo sapiens	ILLUMINA	2019-03-27T00:00:00Z	PANC0504_PANCREAS	cell culture	female	SRP186687	pancreas
SRR8615409	13	RNA-Seq	GCA_000001405.13	202	14582632298	ATCC:AML-193	PRJNA523380	SAMN10987604	Human	7537259002	AML-193	BROAD INSTITUTE	public	bam,sra	gs,ncbi,s3	gs.US,ncbi.public,s3.us-east-1	haematopoietic_neoplasm (acute_myeloid_leukaemia\, M5)	primary	African_american	SRX5414344	Illumina HiSeq 2500	cell line	RNASeq-AML193_HAEMATOPOIETIC_AND_LYMPHOID_TISSUE	PAIRED	cDNA	TRANSCRIPTOMIC	Homo sapiens	ILLUMINA	2019-03-27T00:00:00Z	AML193_HAEMATOPOIETIC_AND_LYMPHOID_TISSUE	cell culture	female	SRP186687	haematopoietic_and_lymphoid_tissue
SRR8615435	16	RNA-Seq	GCA_000001405.13	202	19440246690	DSMZ:RPMI-8402	PRJNA523380	SAMN10988543	Human	10446672015	RPMI-8402	BROAD INSTITUTE	public	bam,sra	gs,ncbi,s3	gs.US,ncbi.public,s3.us-east-1	lymphoid_neoplasm (acute_lymphoblastic_T_cell_leukaemia)	primary	Caucasian	SRX5414318	Illumina HiSeq 2500	cell line	RNASeq-RPMI8402_HAEMATOPOIETIC_AND_LYMPHOID_TISSUE	PAIRED	cDNA	TRANSCRIPTOMIC	Homo sapiens	ILLUMINA	2019-03-27T00:00:00Z	RPMI8402_HAEMATOPOIETIC_AND_LYMPHOID_TISSUE	cell culture	female	SRP186687	haematopoietic_and_lymphoid_tissue
SRR8615445	60	RNA-Seq	GCA_000001405.13	202	16011844514	ATCC:NIH:OVCAR-3	PRJNA523380	SAMN10987888	Human	8301614042	NIH:OVCAR-3	BROAD INSTITUTE	public	bam,sra	gs,ncbi,s3	gs.US,ncbi.public,s3.us-east-1	carcinoma	metastasis	Caucasian	SRX5414308	Illumina HiSeq 2500	cell line	RNASeq-NIHOVCAR3_OVARY	PAIRED	cDNA	TRANSCRIPTOMIC	Homo sapiens	ILLUMINA	2019-03-27T00:00:00Z	NIHOVCAR3_OVARY	cell culture	female	SRP186687	ovary
SRR8615456	54	RNA-Seq	GCA_000001405.13	202	16029980882	DSMZ:HCC-44	PRJNA523380	SAMN10988276	Human	7952284672	HCC-44	BROAD INSTITUTE	public	bam,sra	gs,ncbi,s3	gs.US,ncbi.public,s3.us-east-1	carcinoma (adenocarcinoma)	primary	Caucasian	SRX5414297	Illumina HiSeq 2500	cell line	RNASeq-HCC44_LUNG	PAIRED	cDNA	TRANSCRIPTOMIC	Homo sapiens	ILLUMINA	2019-03-27T00:00:00Z	HCC44_LUNG	cell culture	female	SRP186687	lung
[truncated: 125 more rows]
